# Supplementary material for: Gene expression changes occurring at bolting time are associated with leaf senescence in Arabidopsis
Source: PubMed Central journal article supplement (PMC7649007; doi:10.1002/pld3.279), 2020-11-08

# AT1G01070

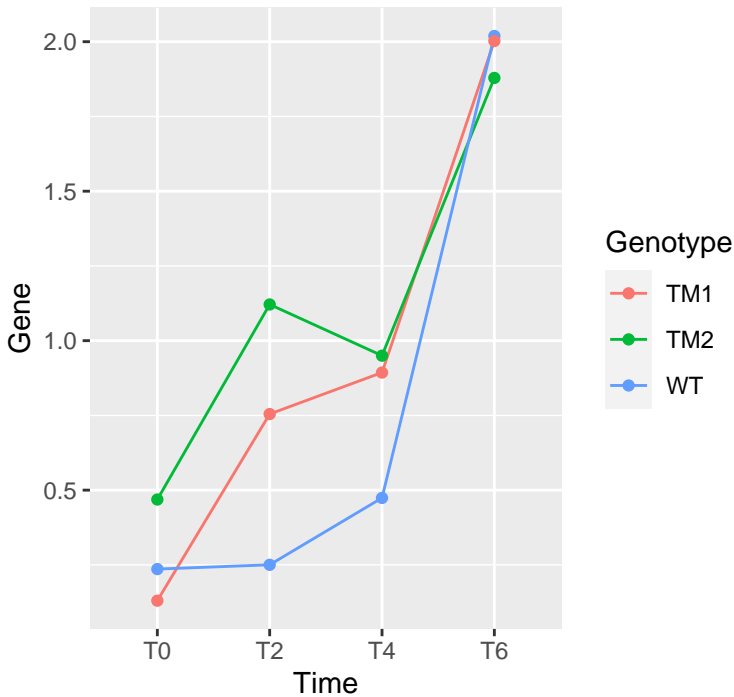

# AT1G01470

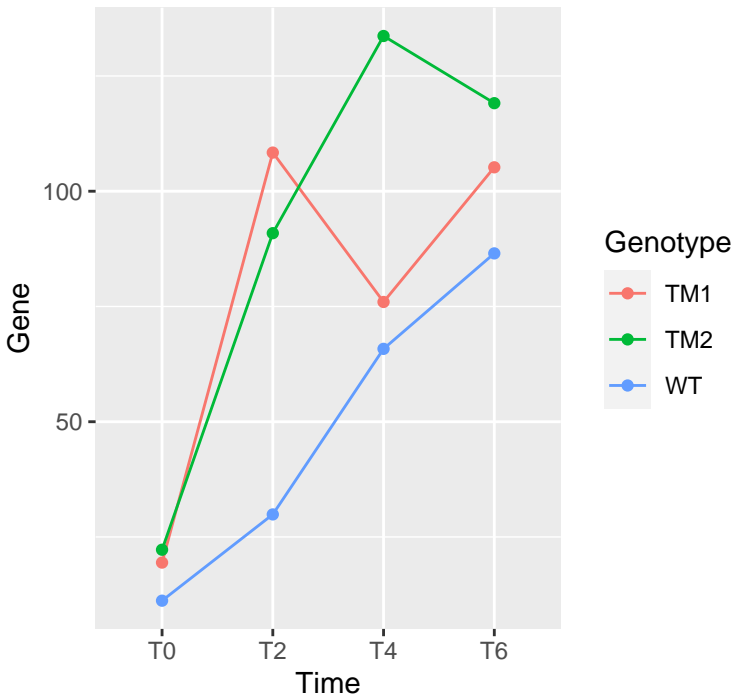

# AT1G01720

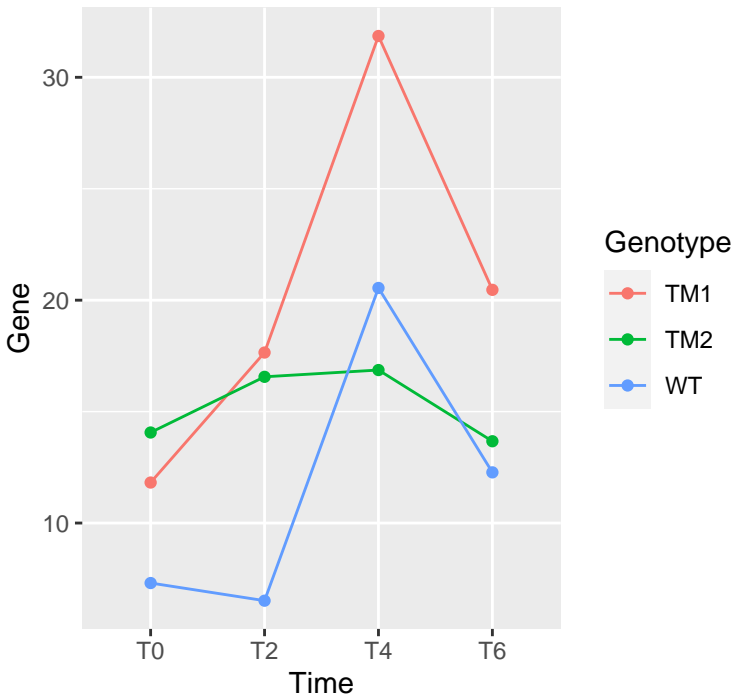

# AT1G02460

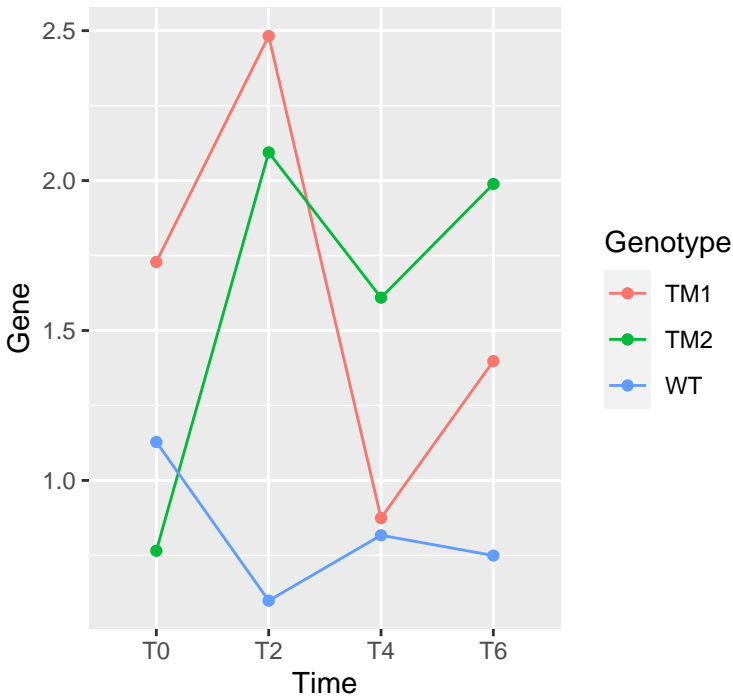

# AT1G02610

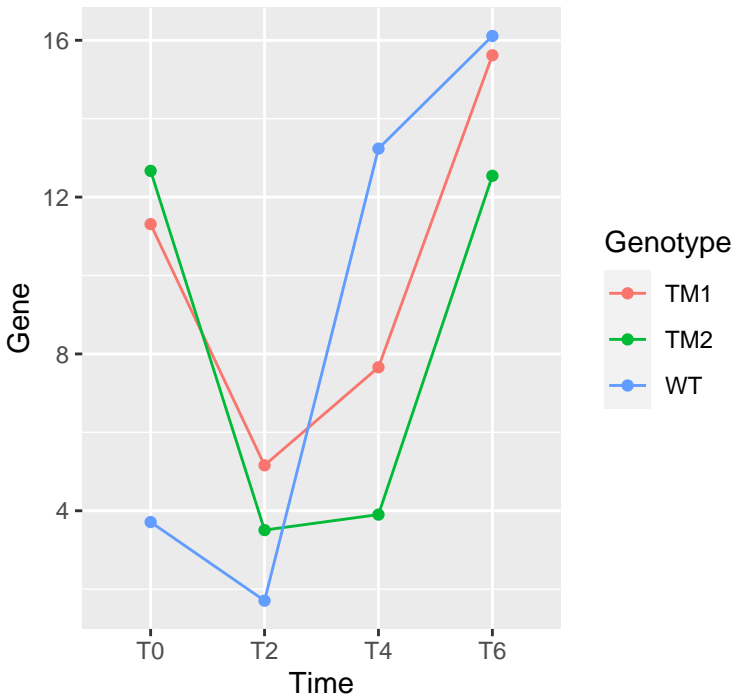

# AT1G02850

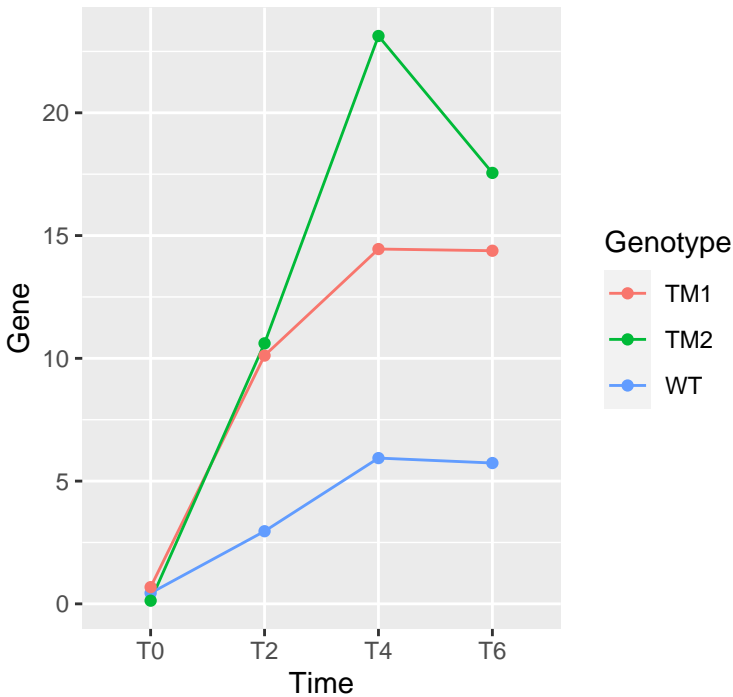

# AT1G03770

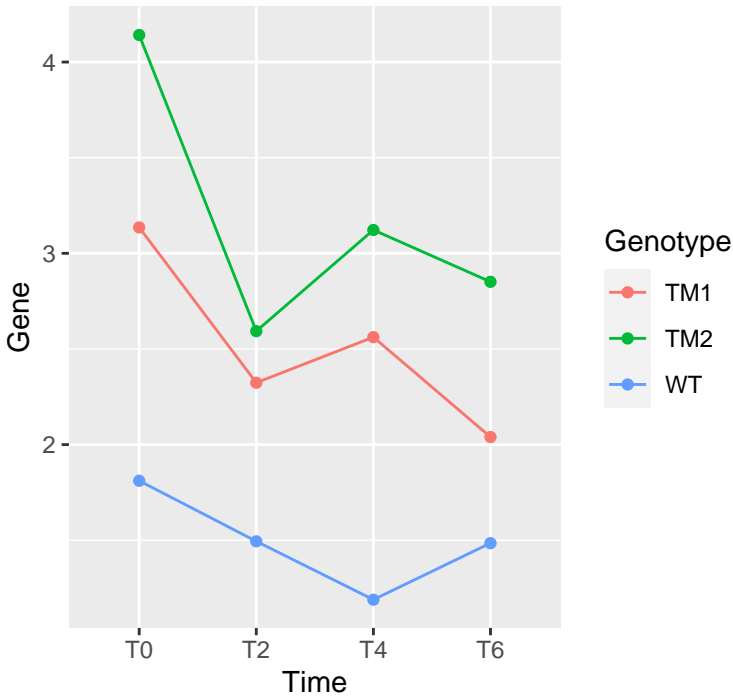

# AT1G03870

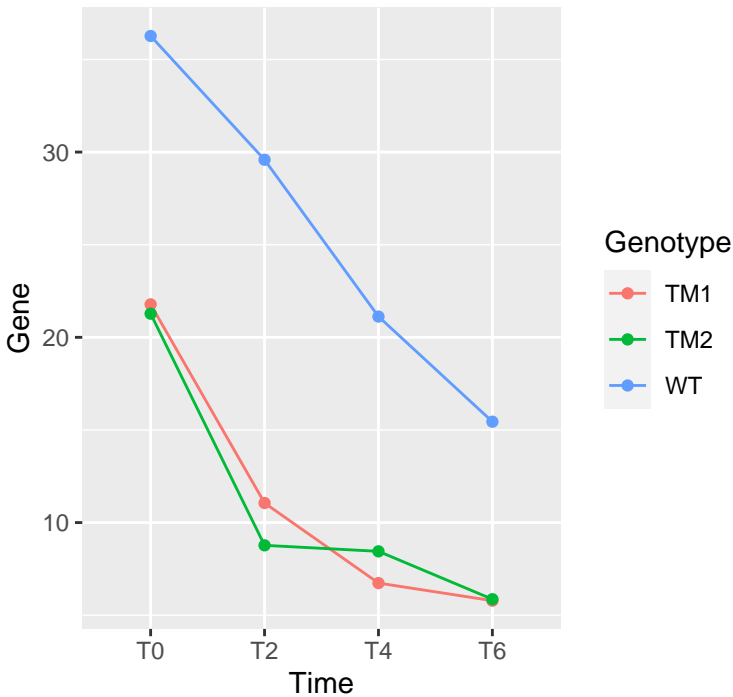



# AT1G04040

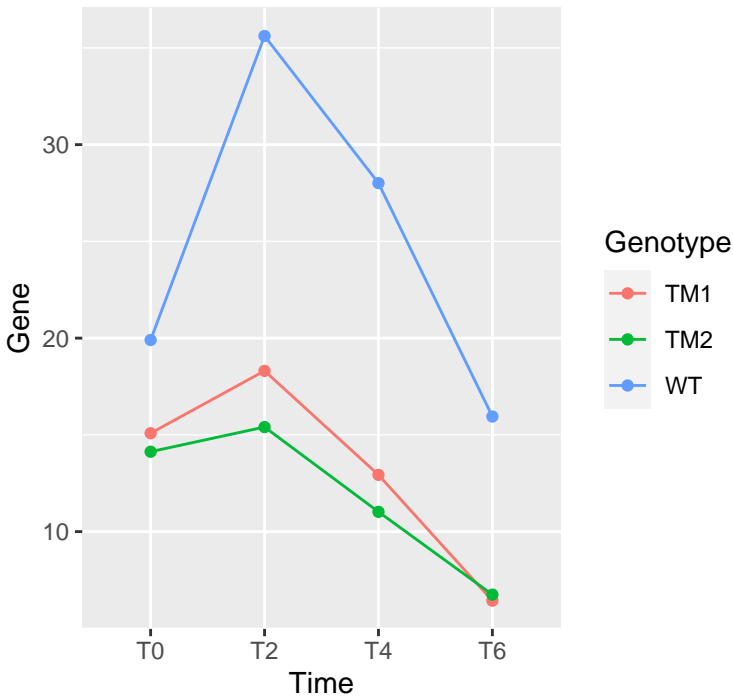

# AT1G04680

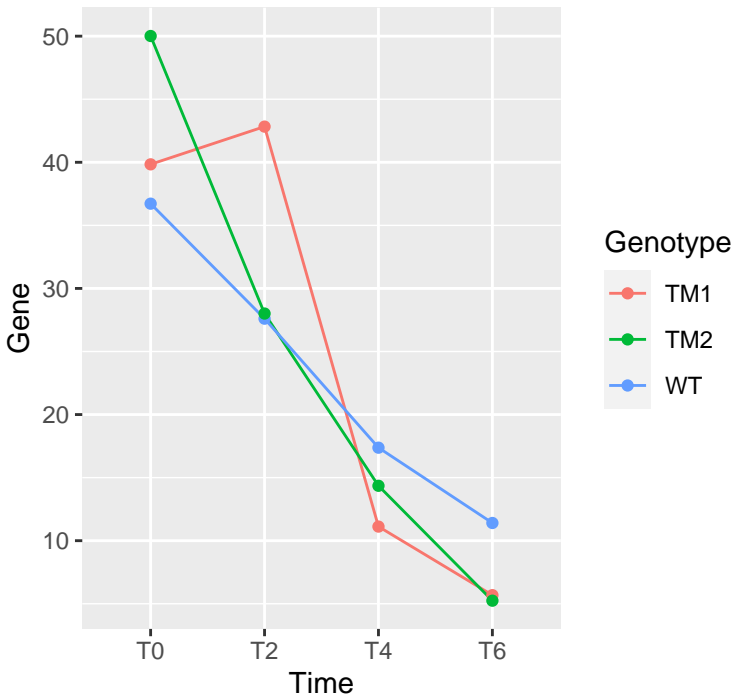

# AT1G05300

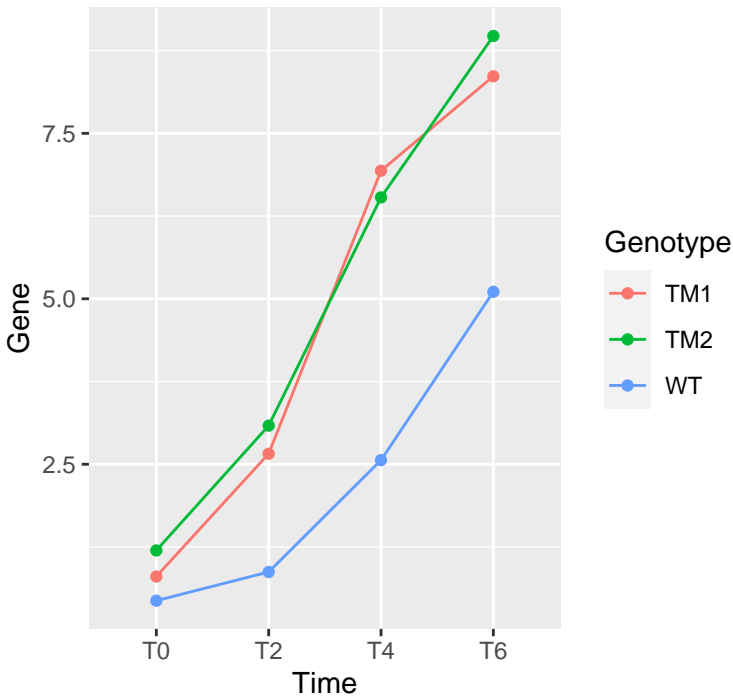

# AT1G07150

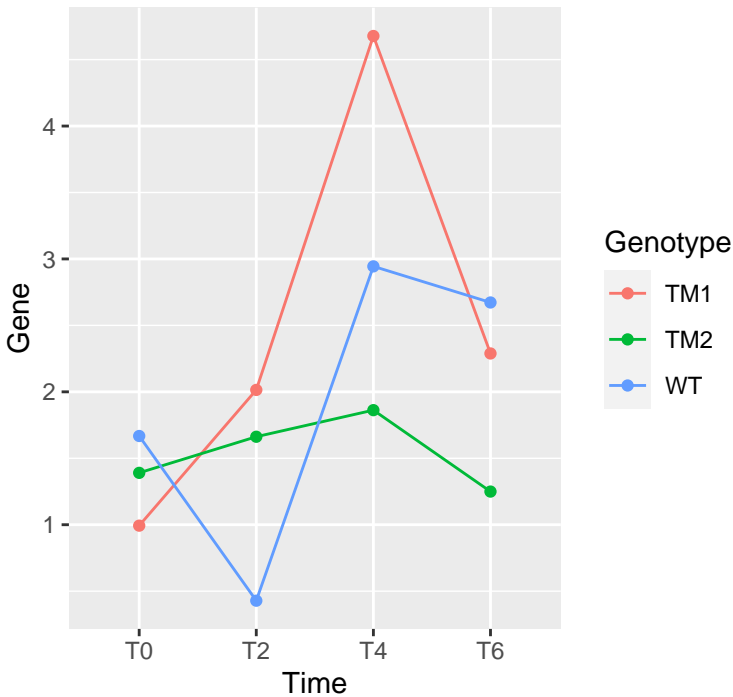

# AT1G07430

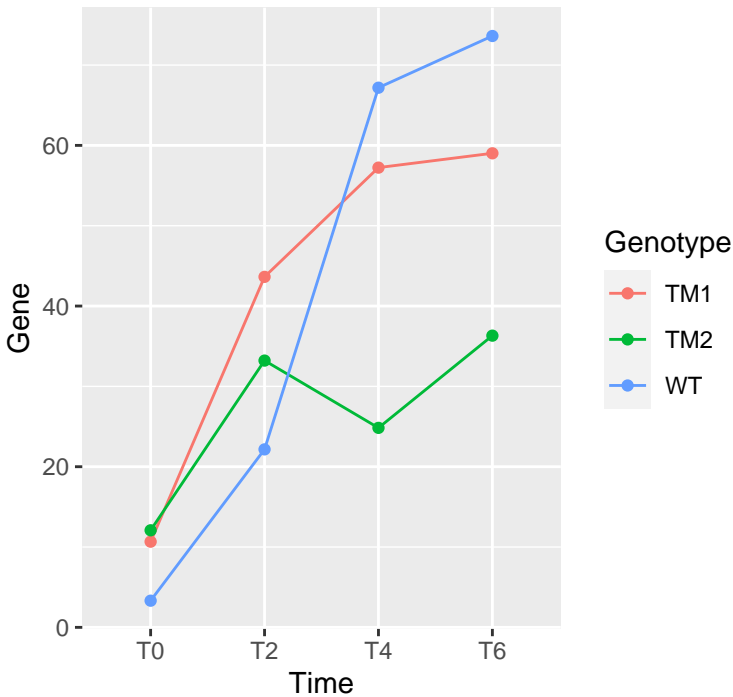

# AT1G07610

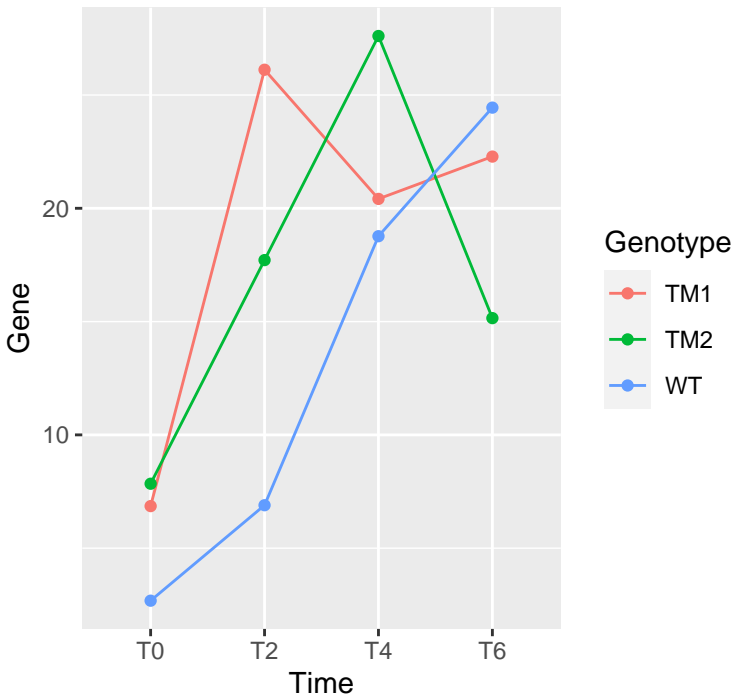

# AT1G07900

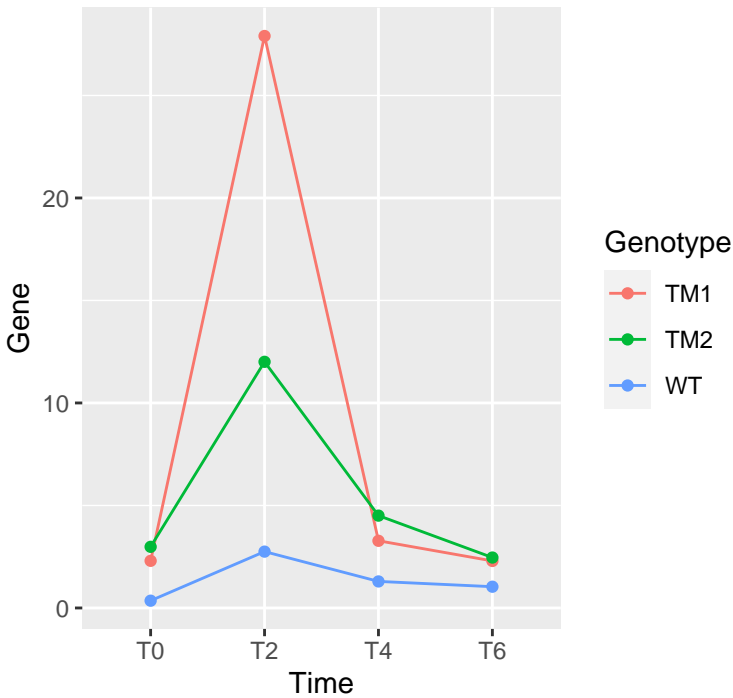

# AT1G08050

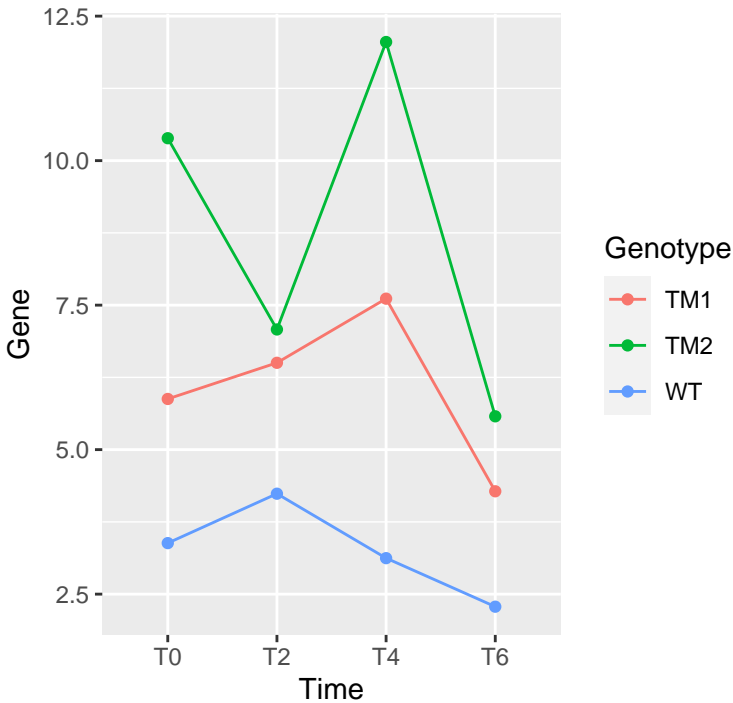



# AT1G08230

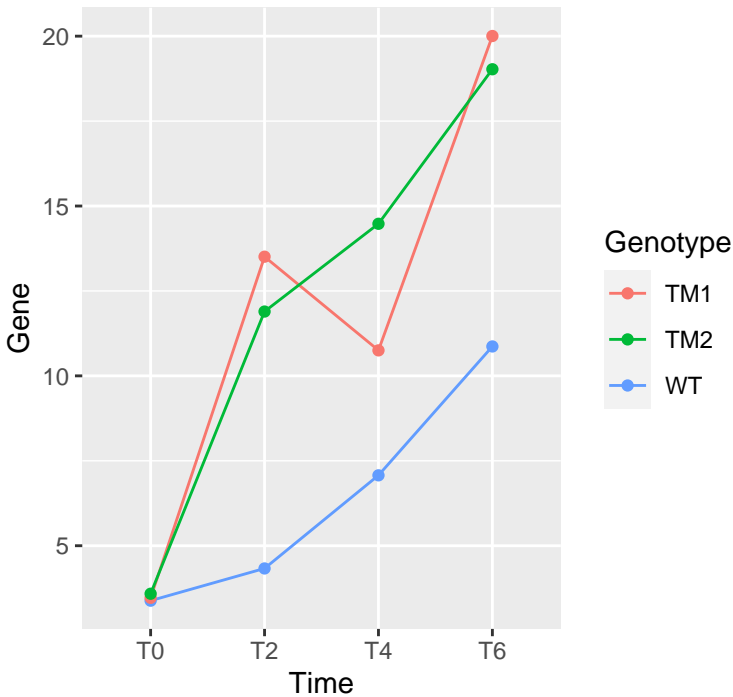

# AT1G08560

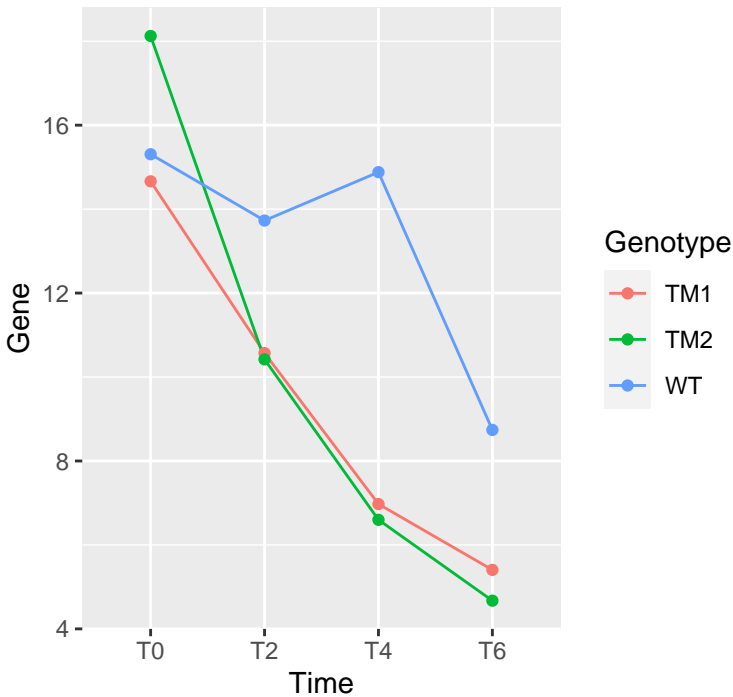

# AT1G08940

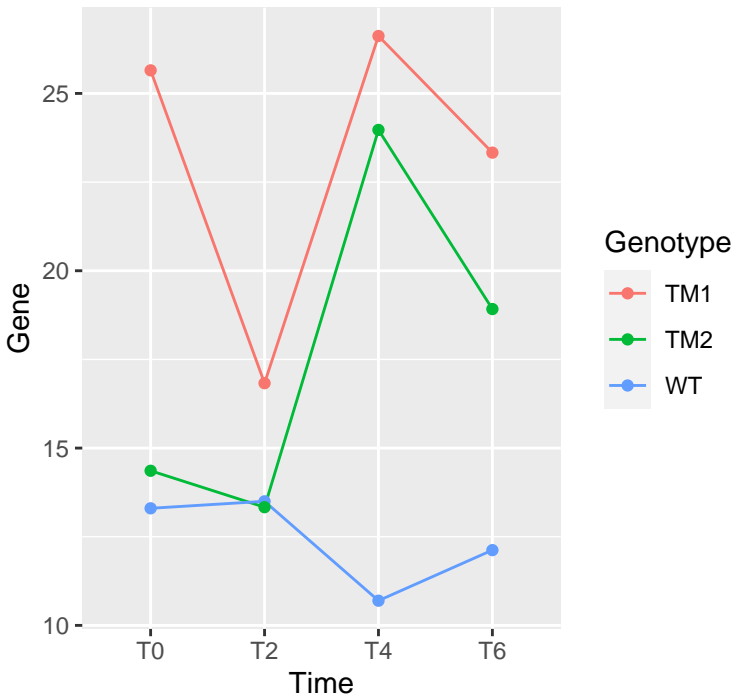

# AT1G09140

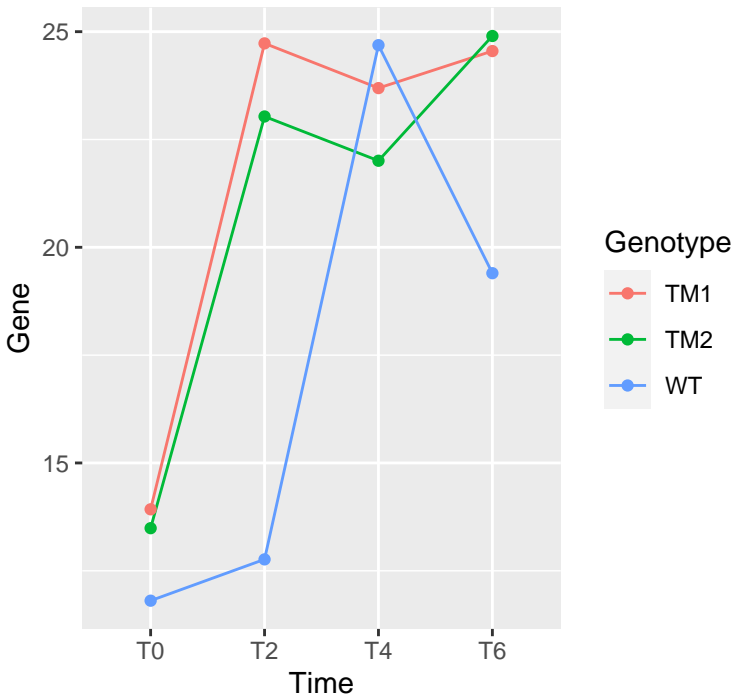

# AT1G09932

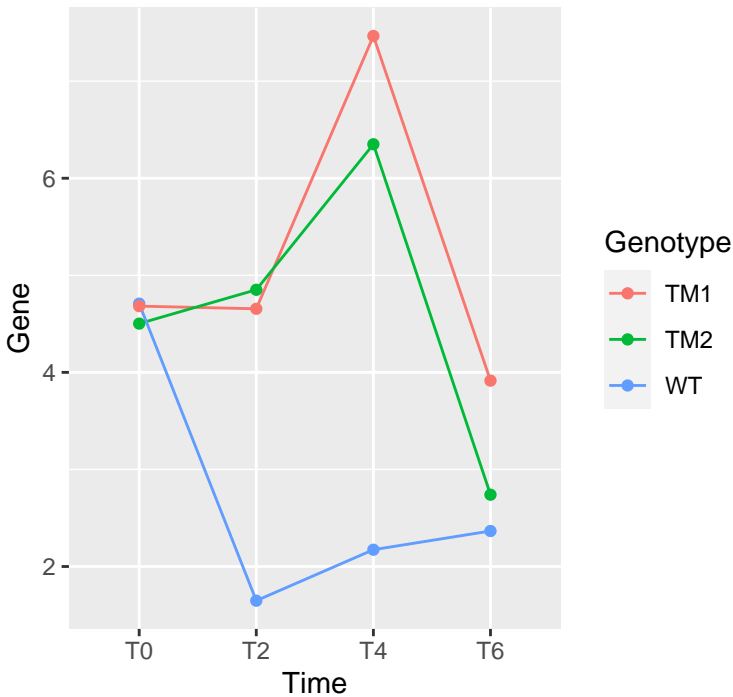

# AT1G12760

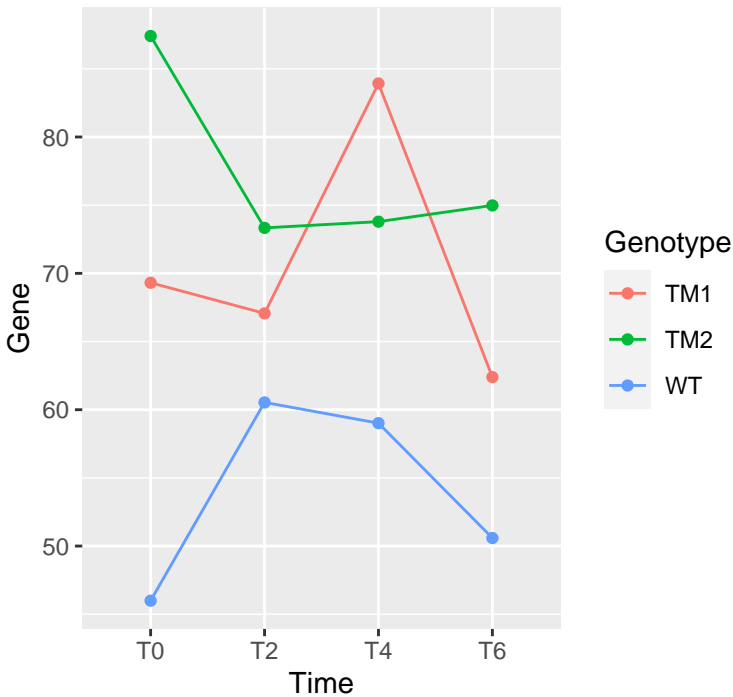

# AT1G13930

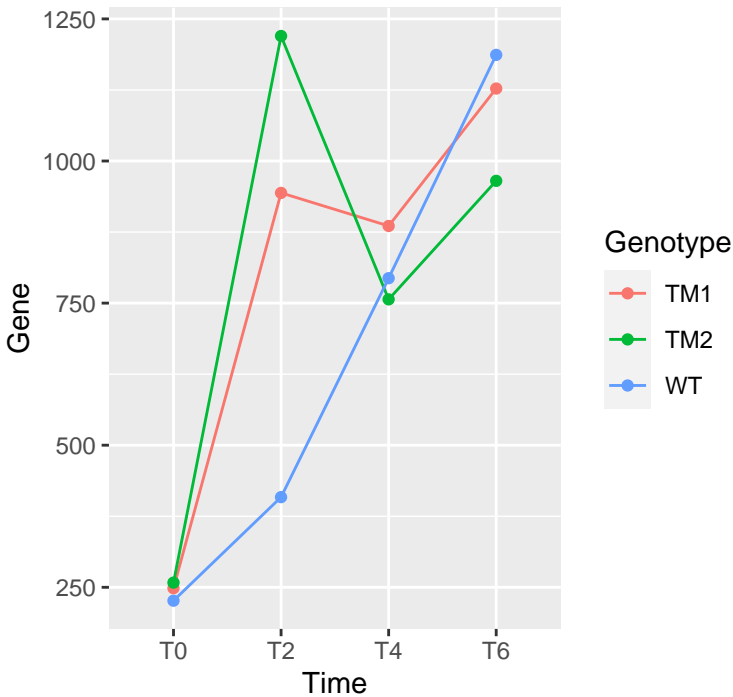

# AT1G14200

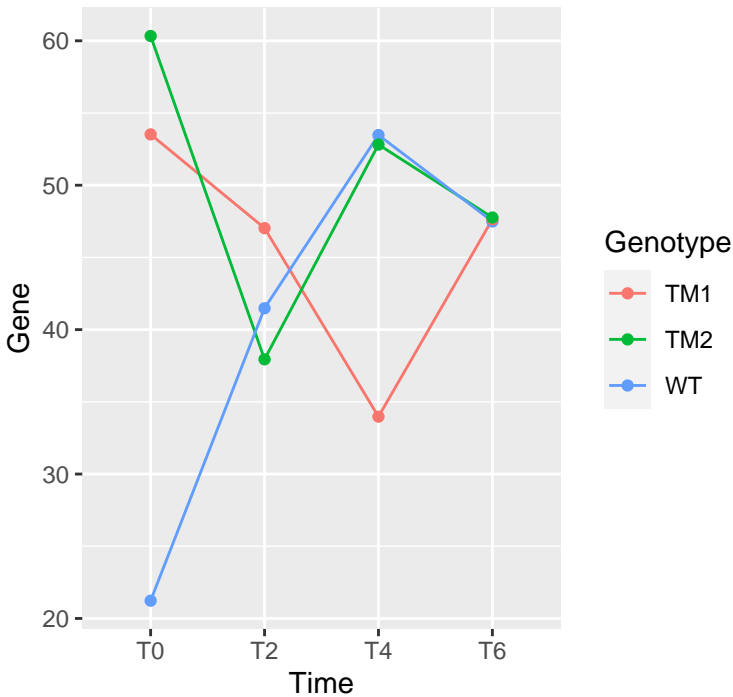



# AT1G14250

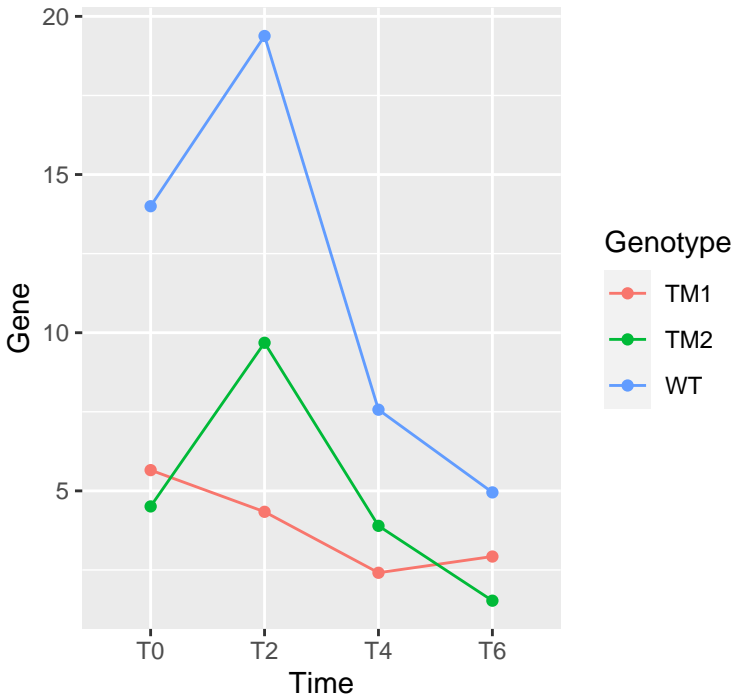

# AT1G14870

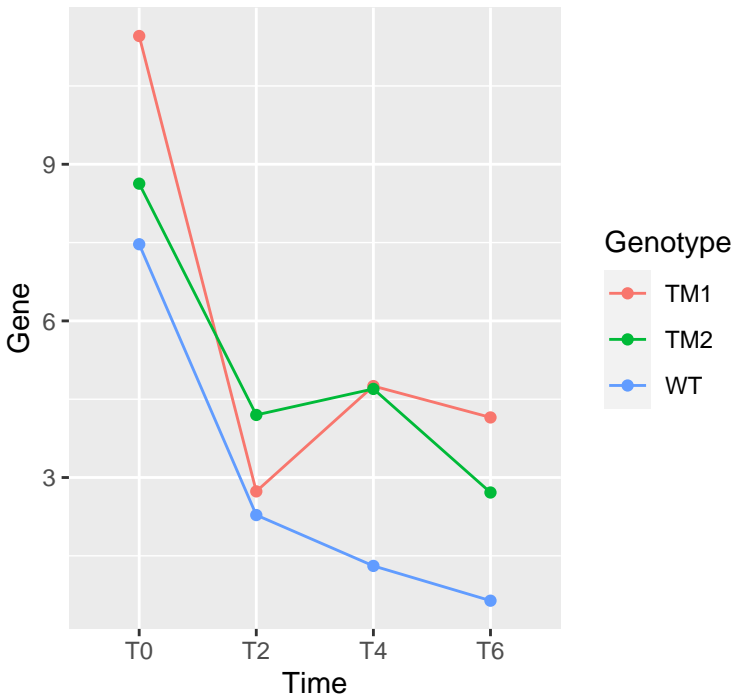

# AT1G15570

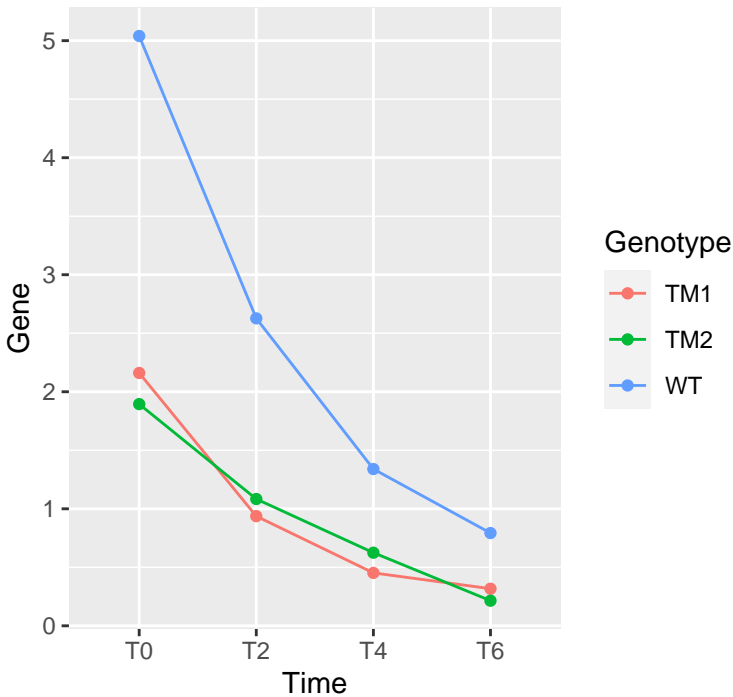

# AT1G15670

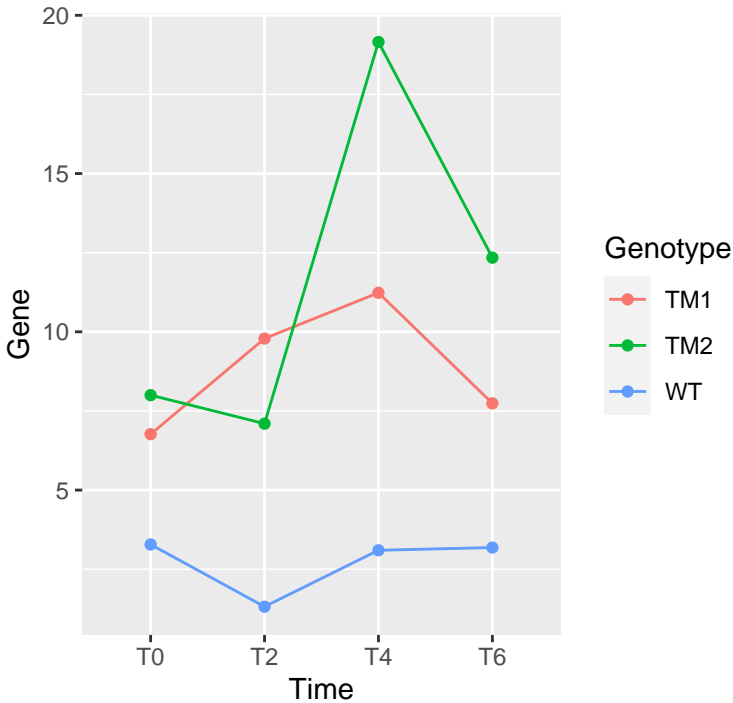

# AT1G16510

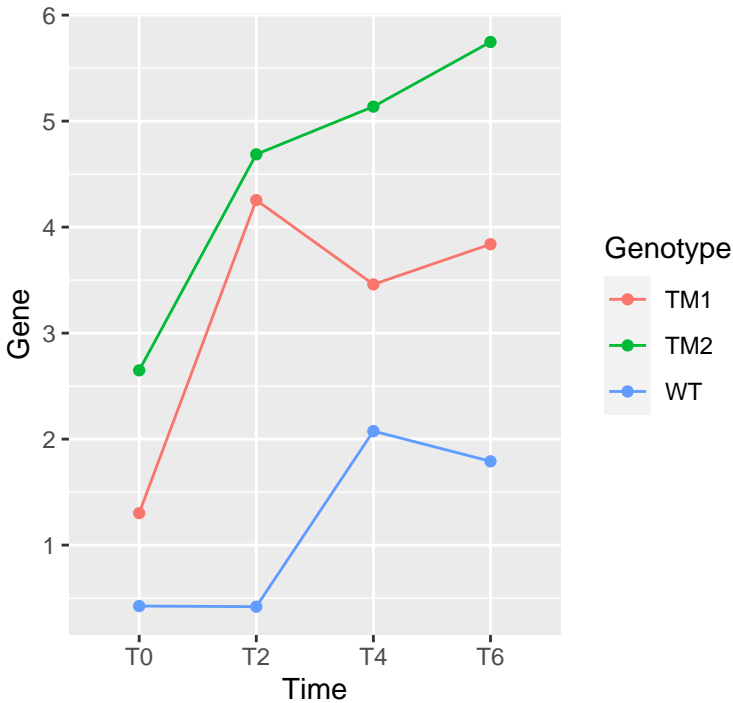

# AT1G17140

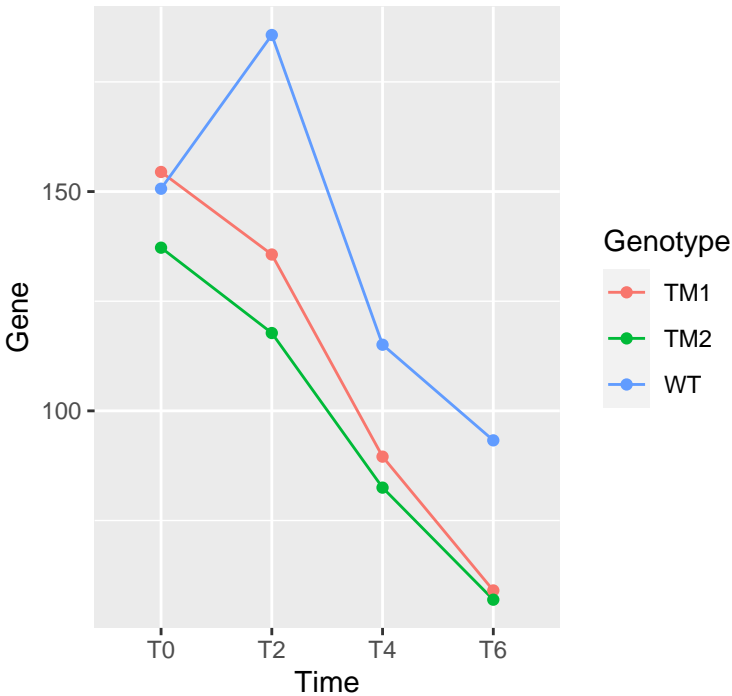

# AT1G17170

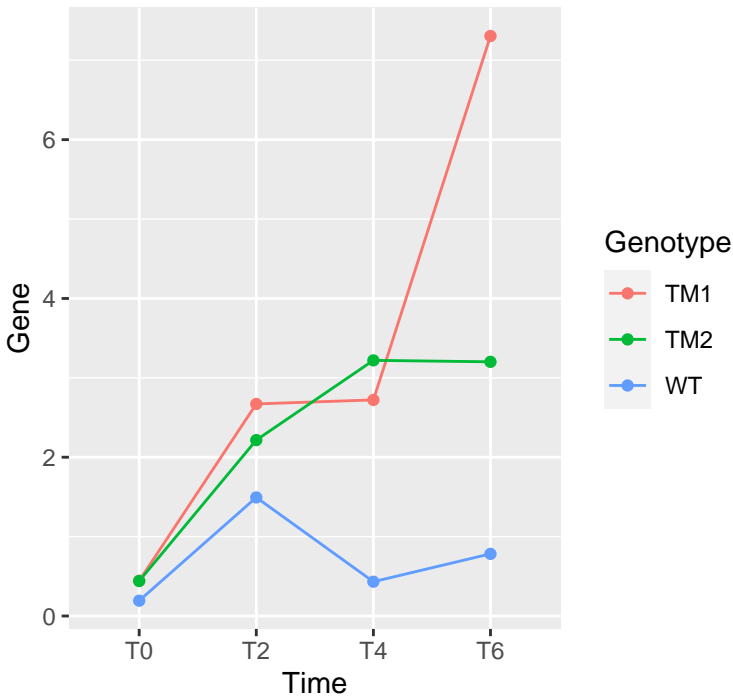

# AT1G18990

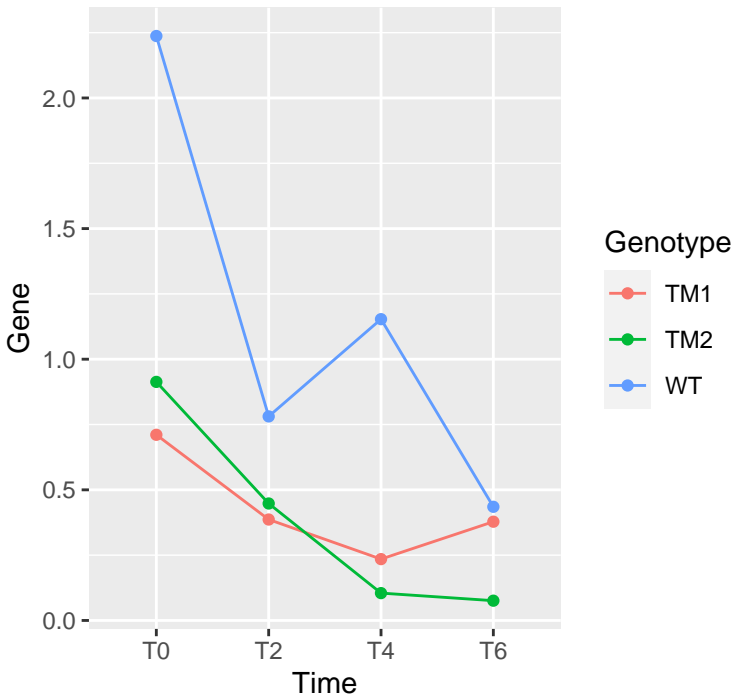



# AT1G19350

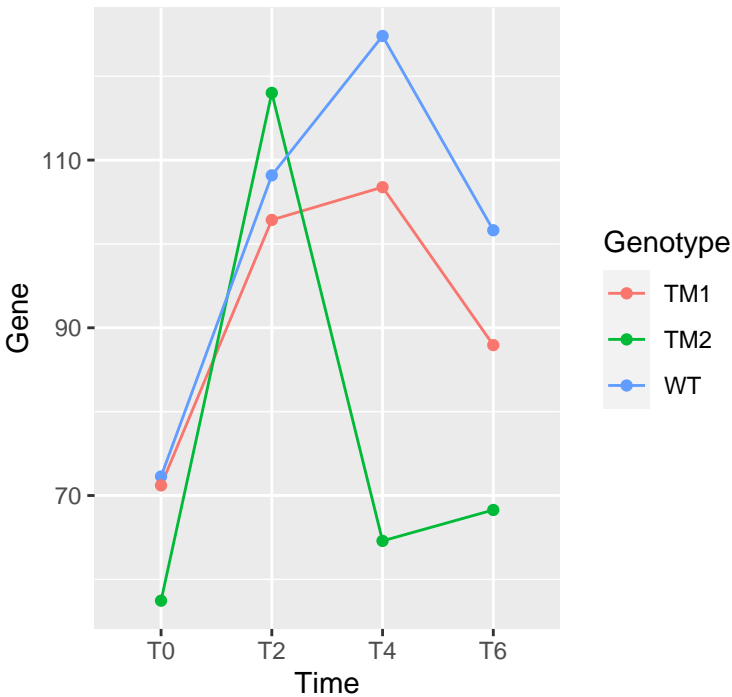

# AT1G20190

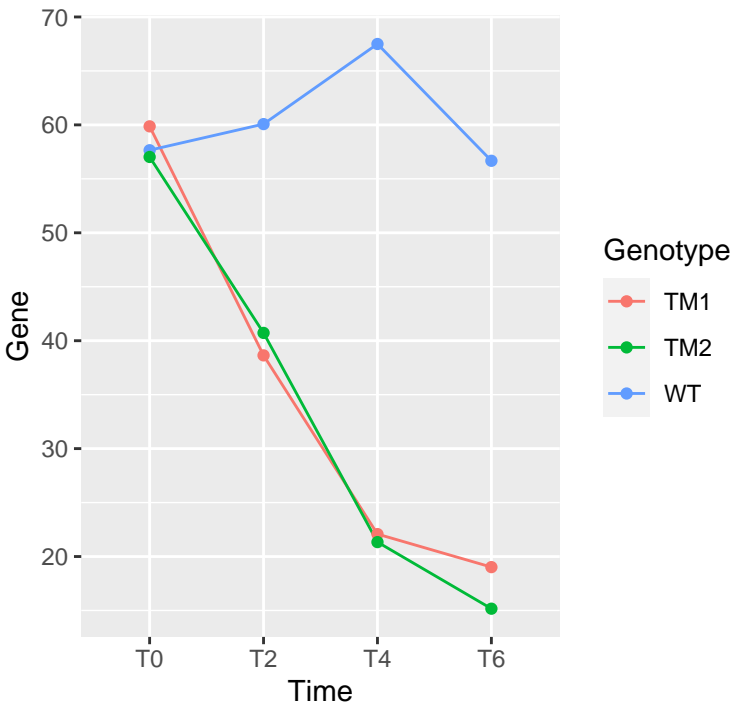

# AT1G20350

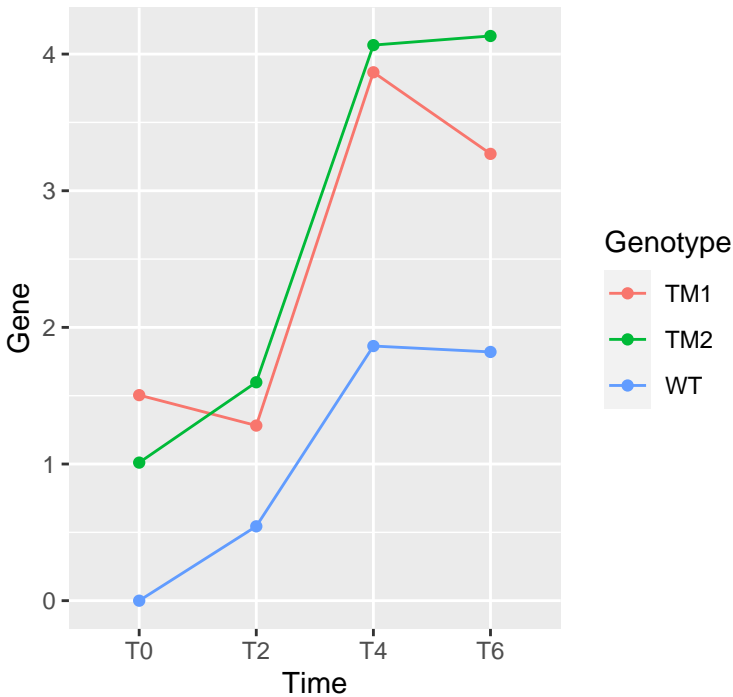

# AT1G20440

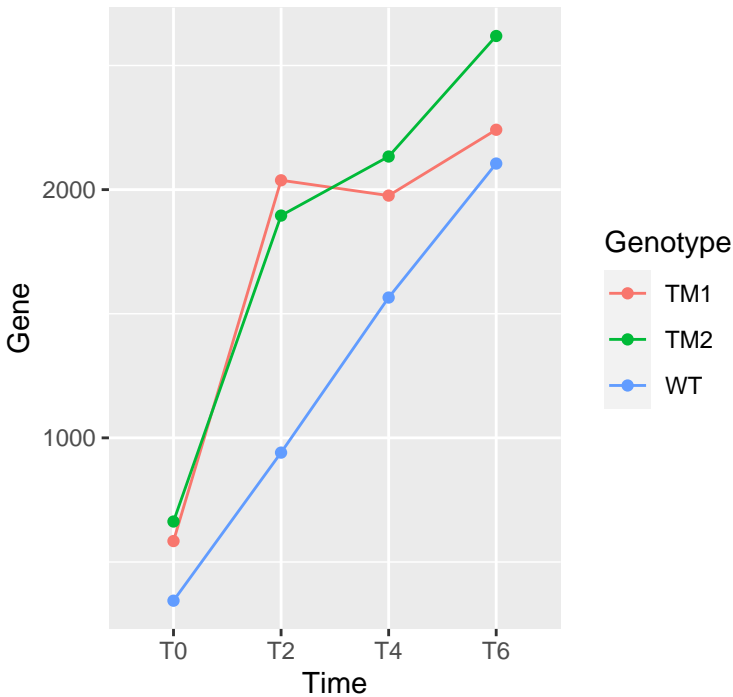

# AT1G21140

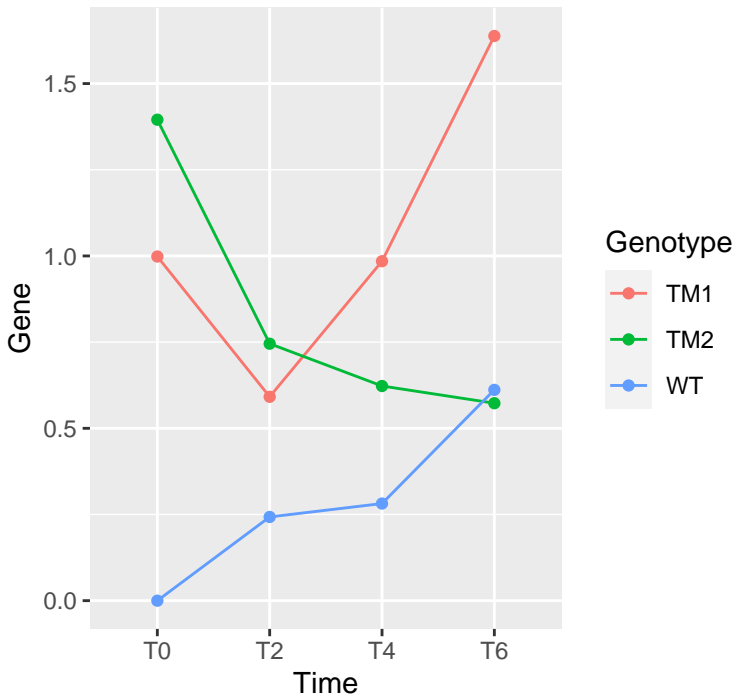

# AT1G21410

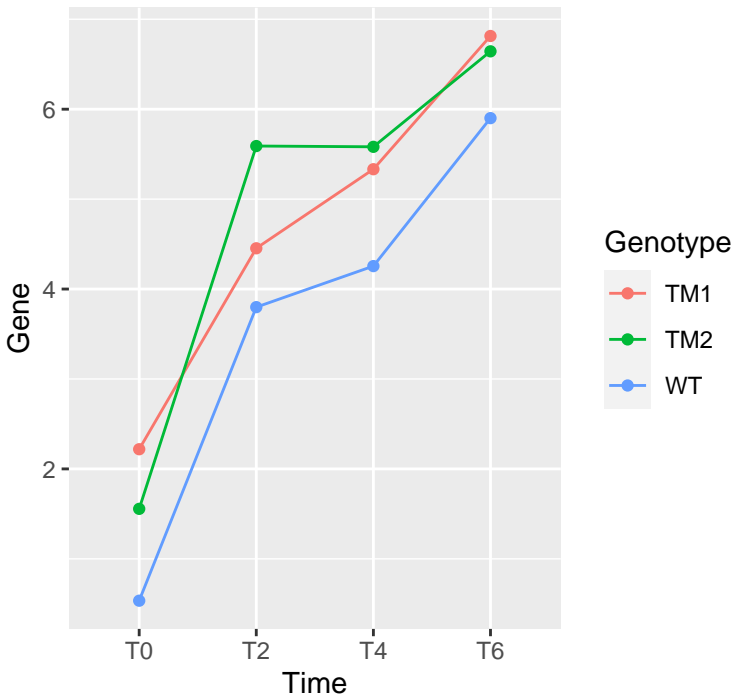

# AT1G22180

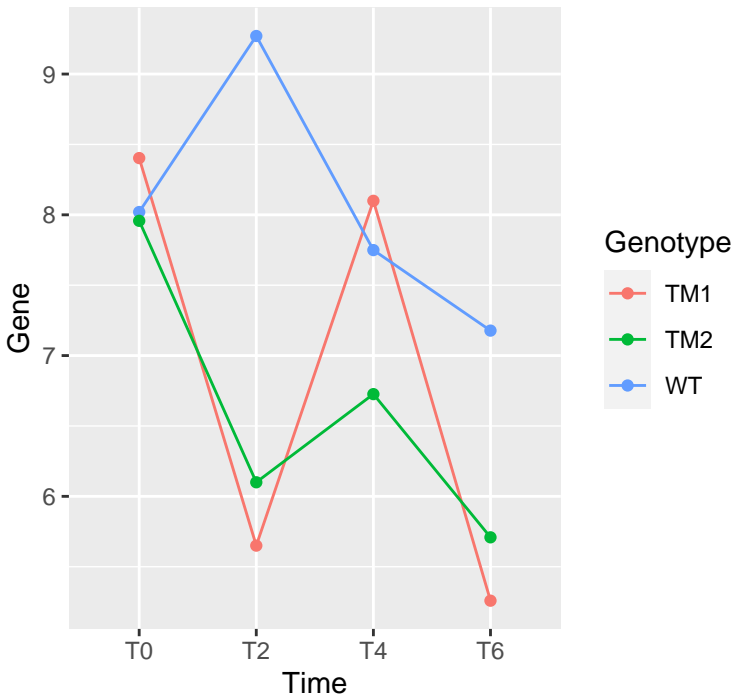

# AT1G22250

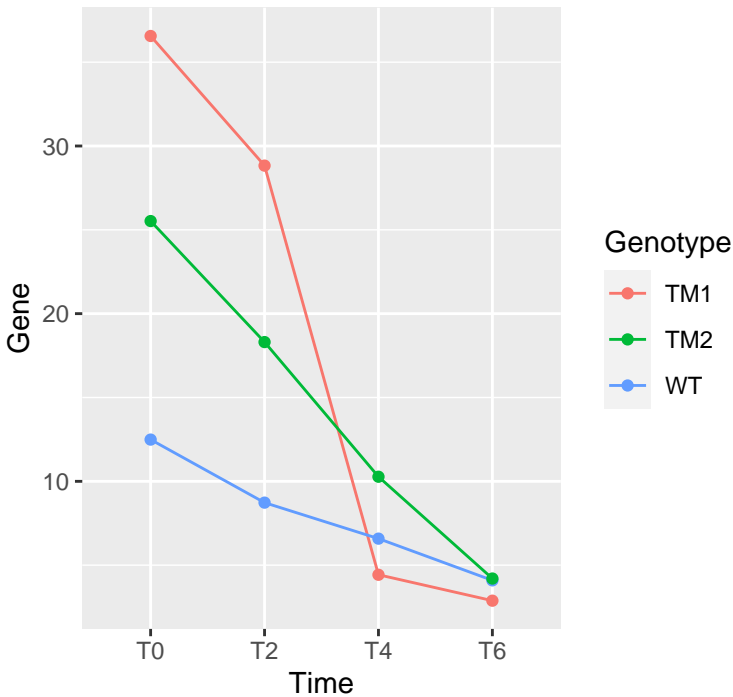



# AT1G23050

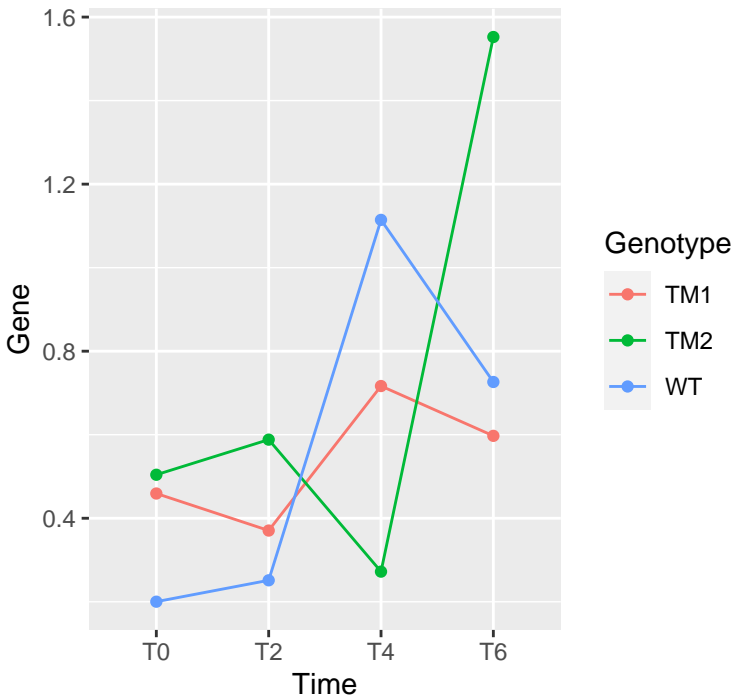

# AT1G24290

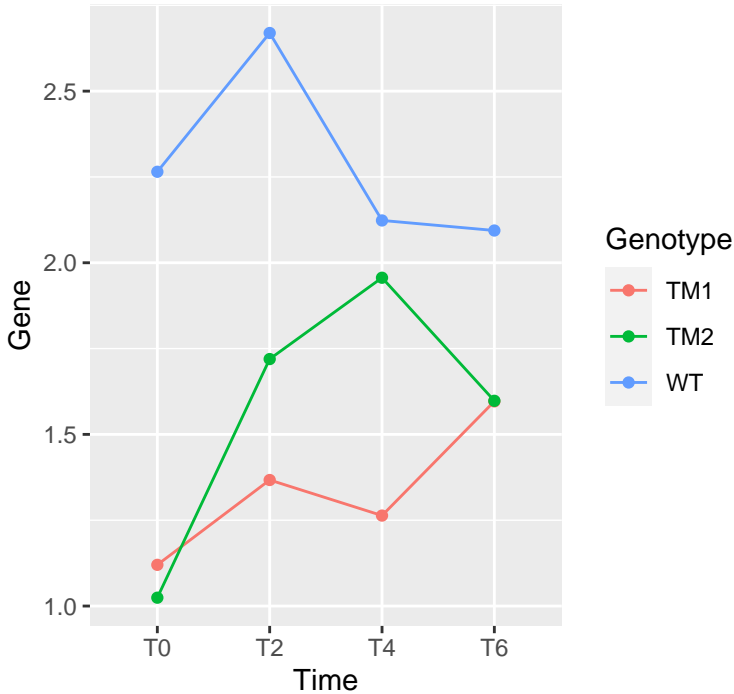

# AT1G25275

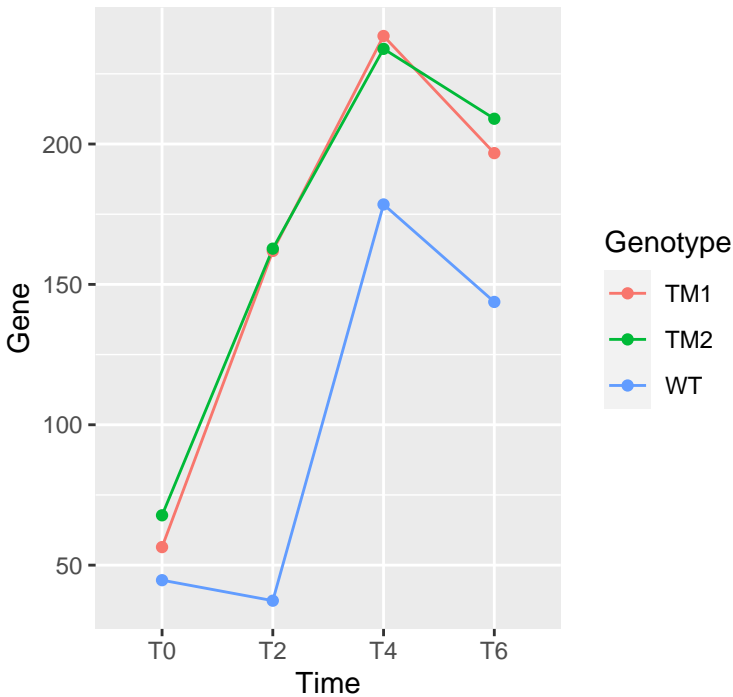

# AT1G25500

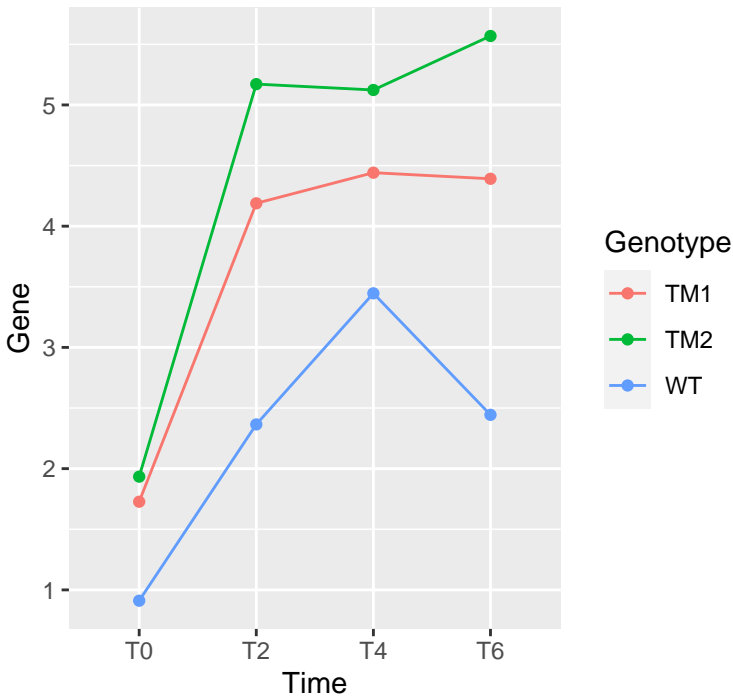

# AT1G26290

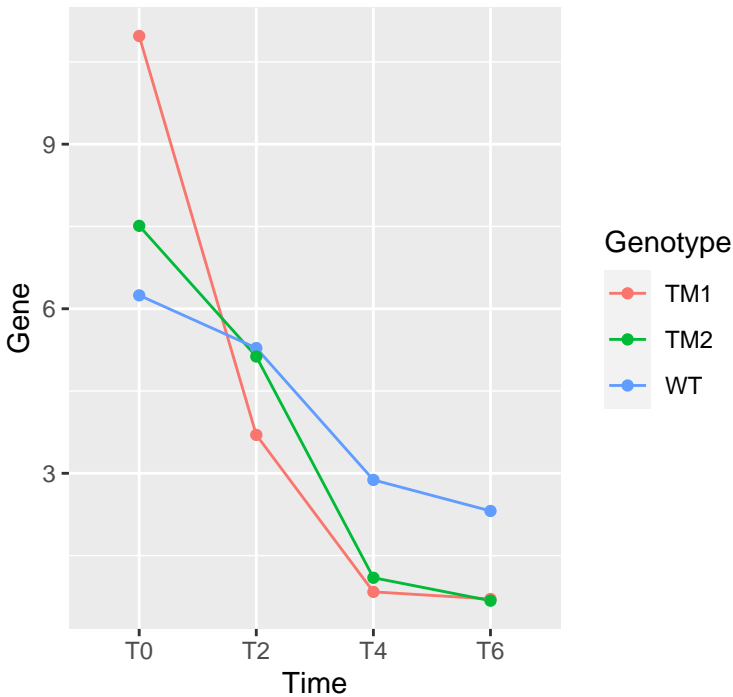

# AT1G26380

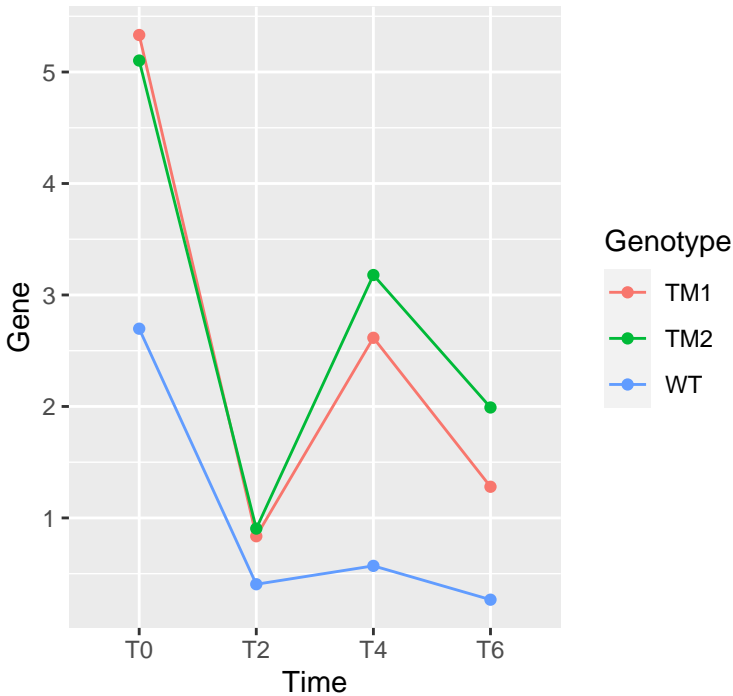

# AT1G26770

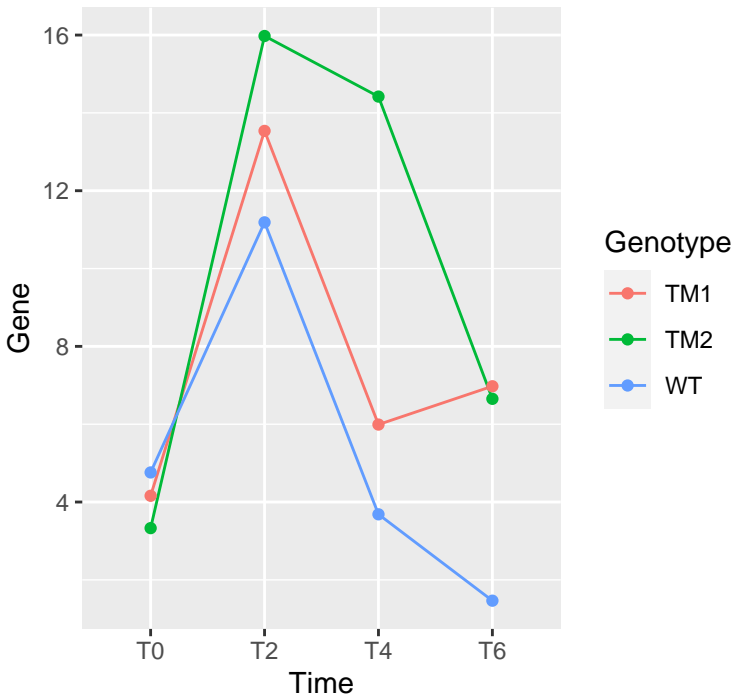

# AT1G27290

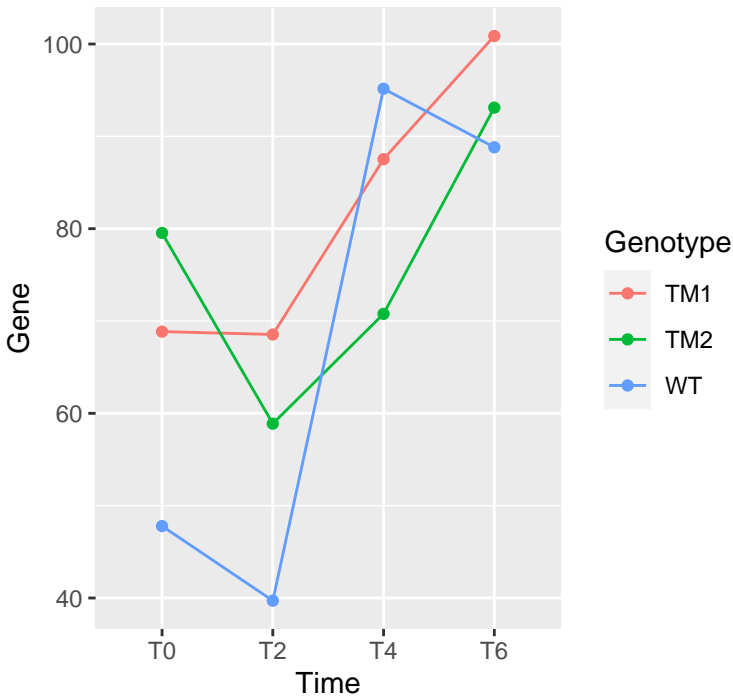



# AT1G28010

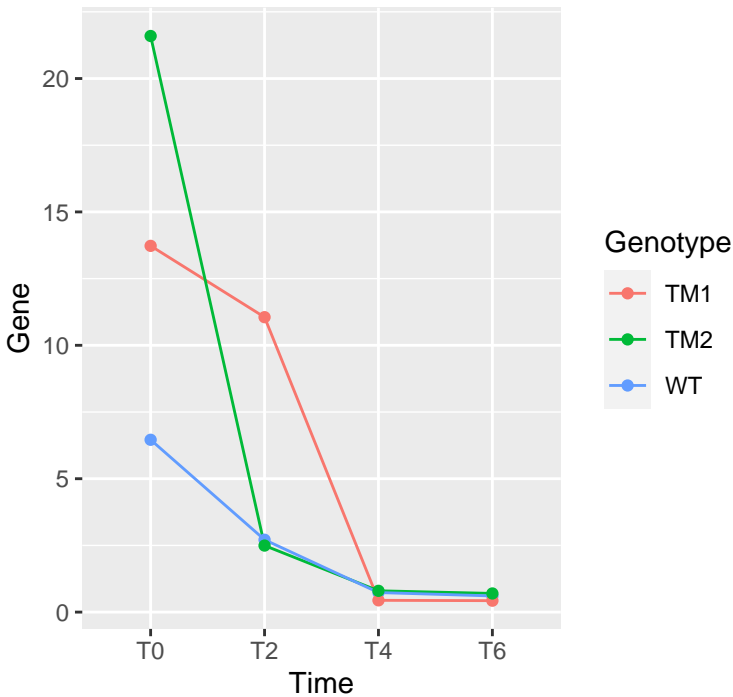

# AT1G28600

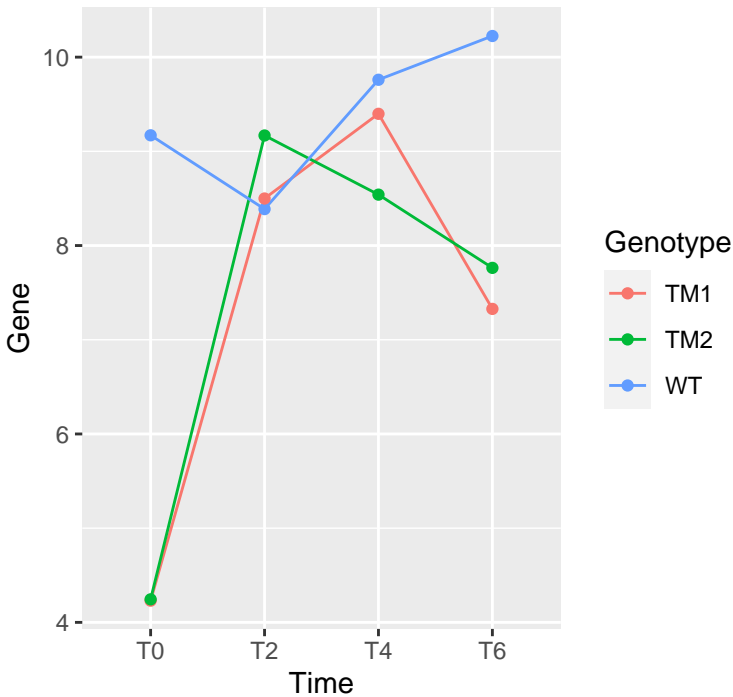

# AT1G29050

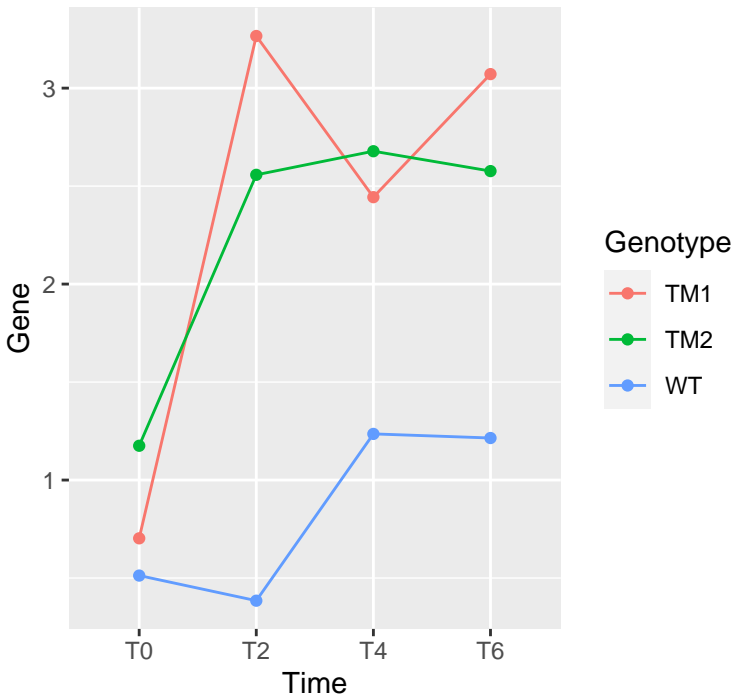

# AT1G29470

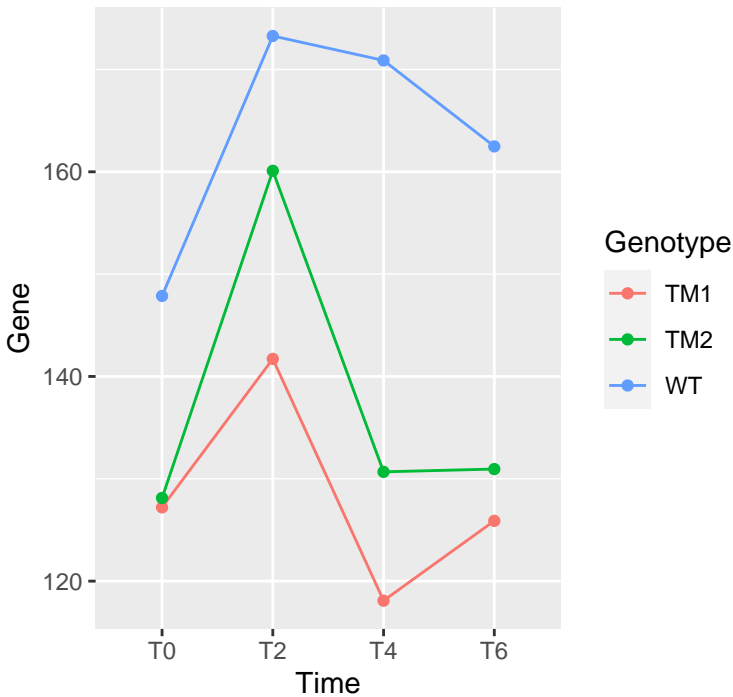

# AT1G29660

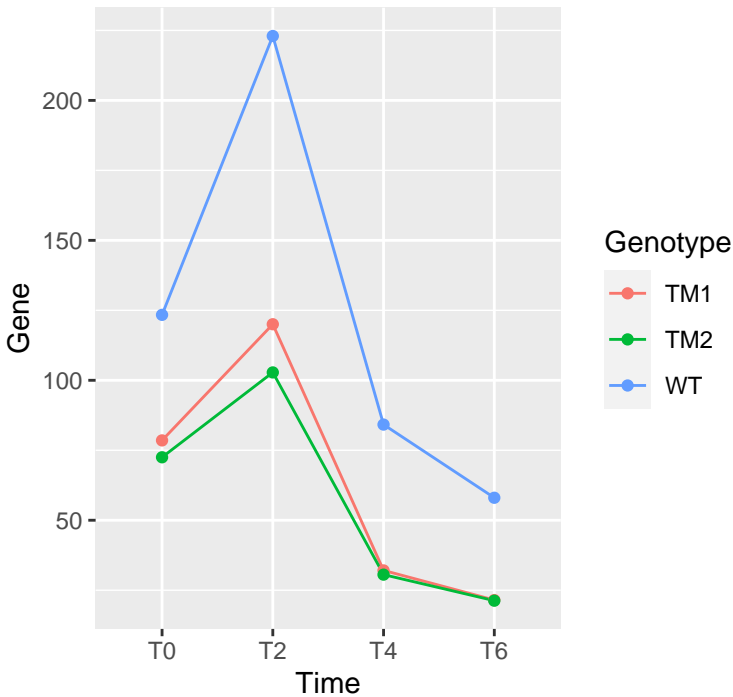

# AT1G30250

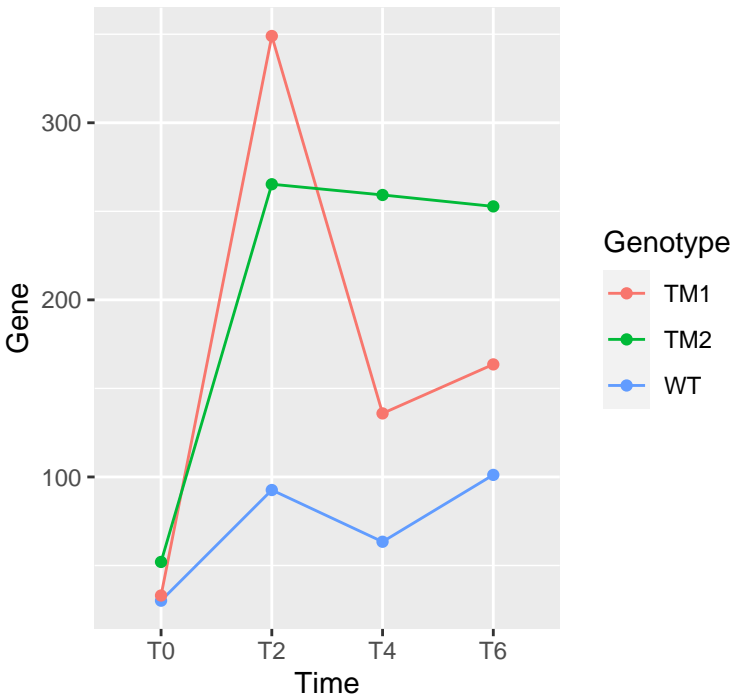

# AT1G30320

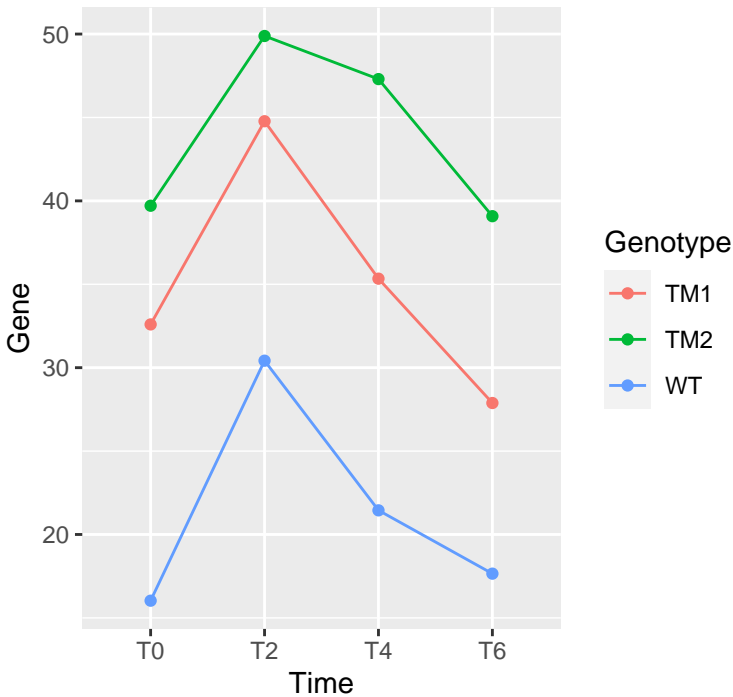

# AT1G30700

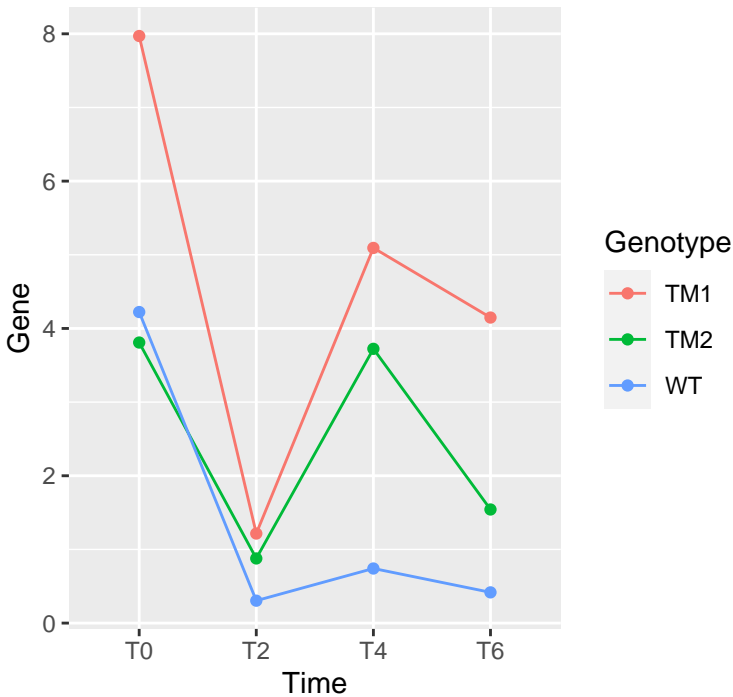



# AT1G33110

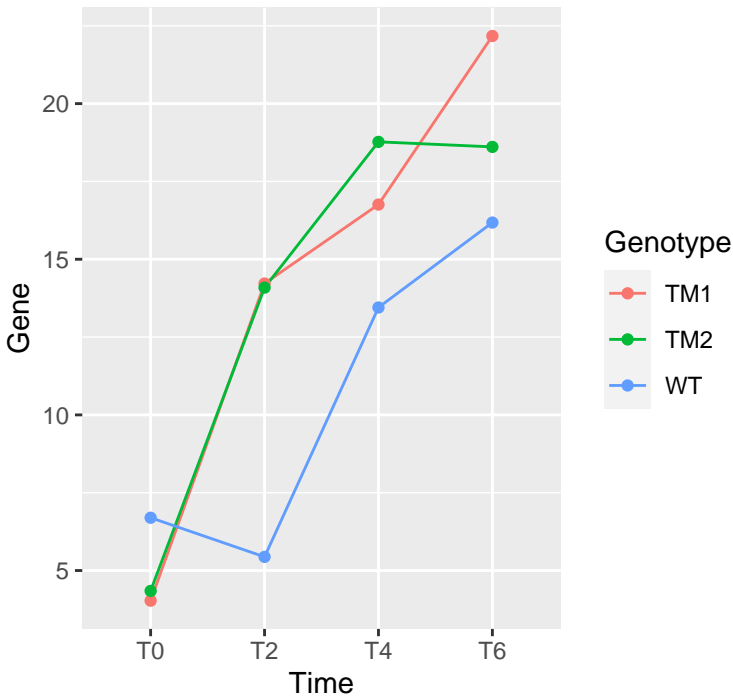

# AT1G33260

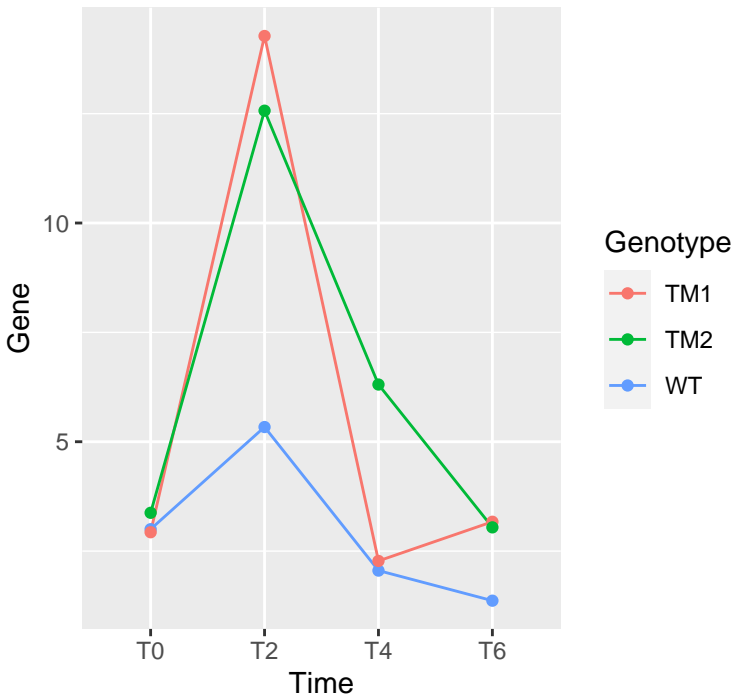

# AT1G37130

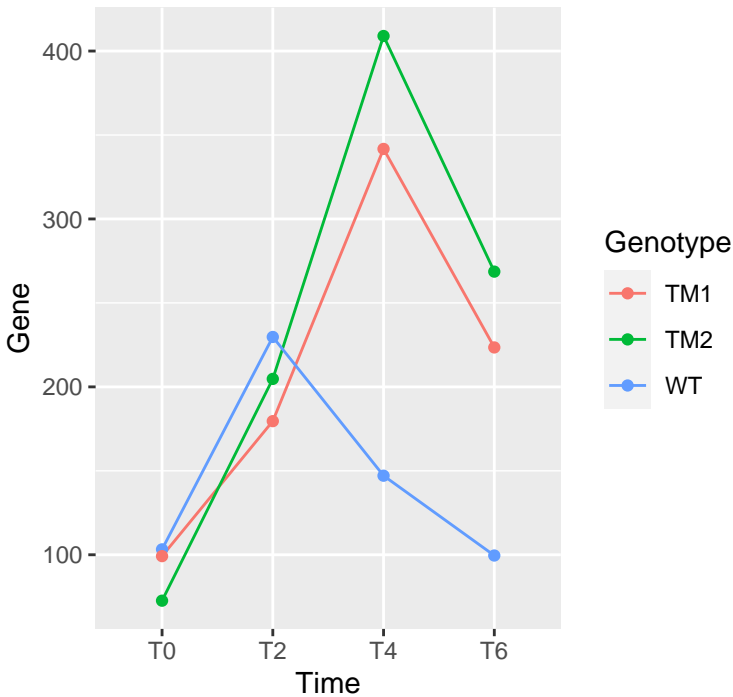

# AT1G41830

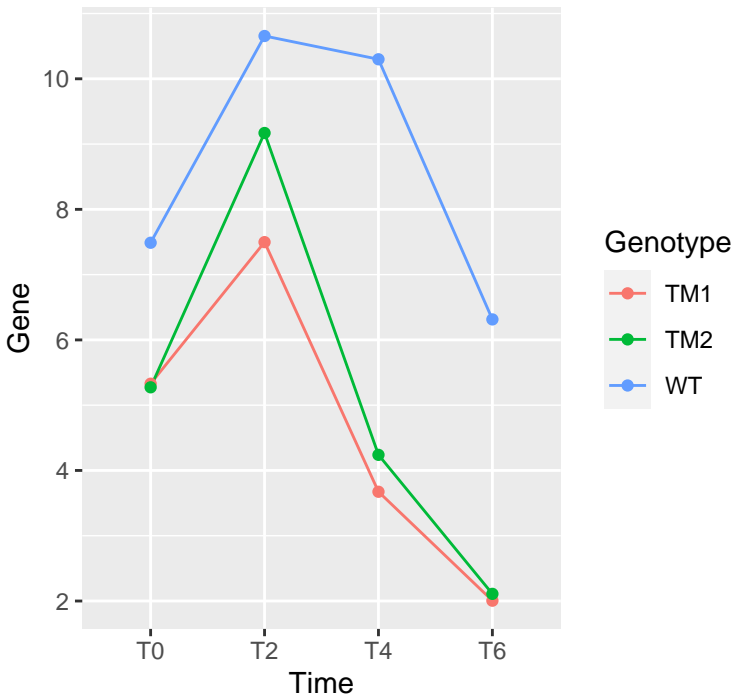

# AT1G45130

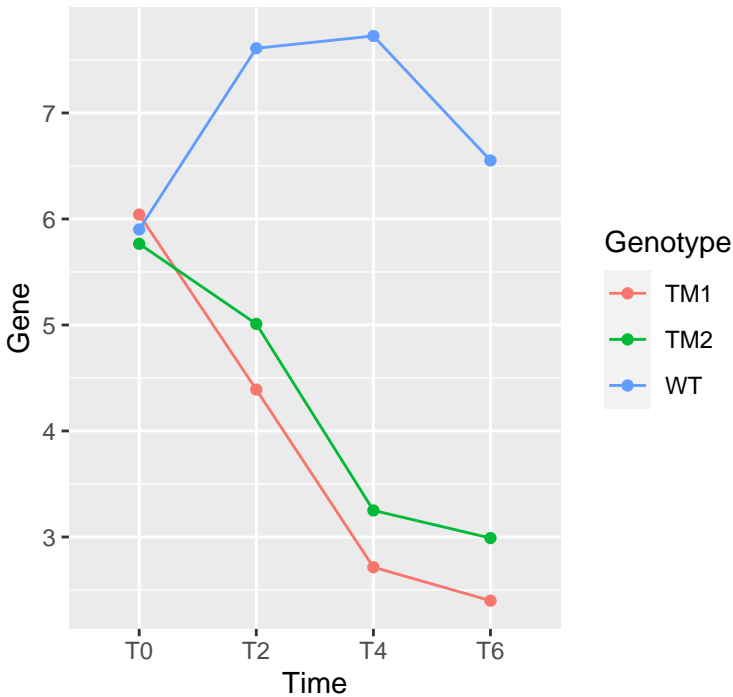

# AT1G47960

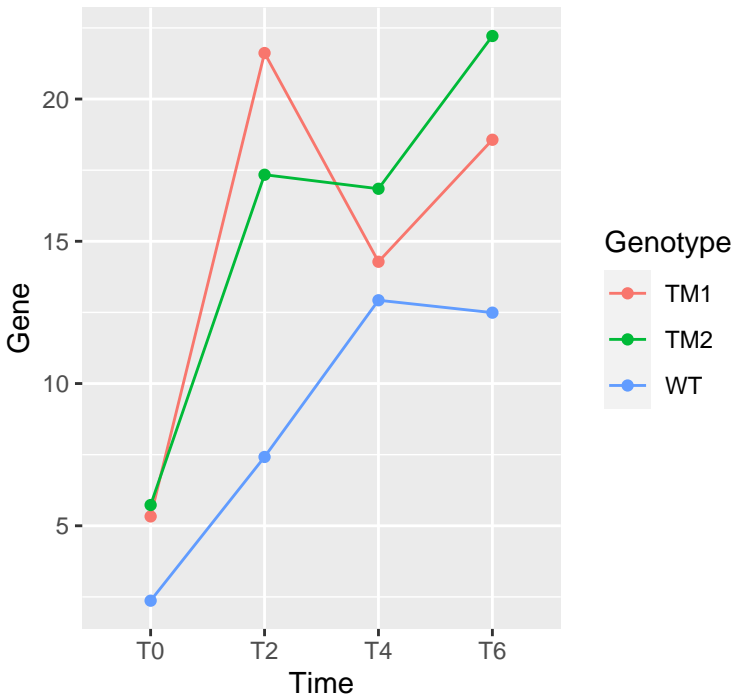

# AT1G48480

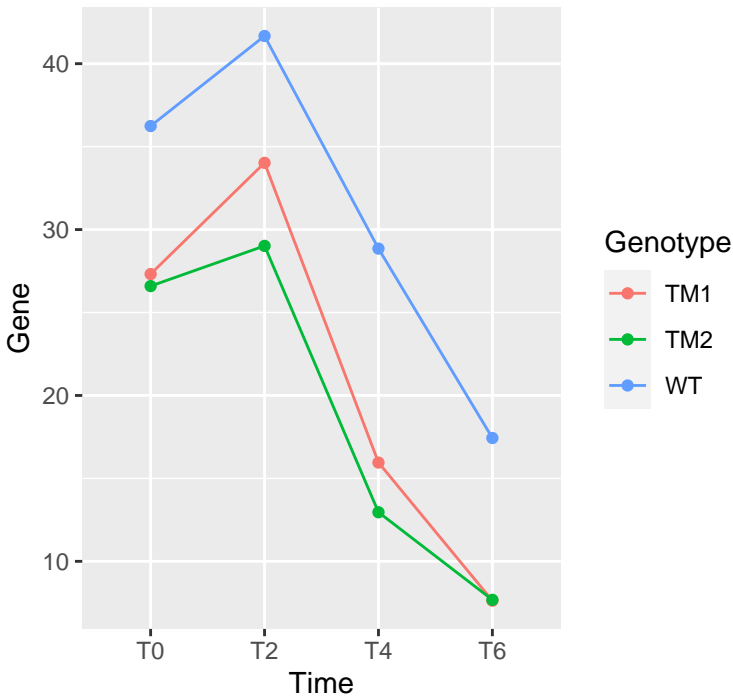

# AT1G49310

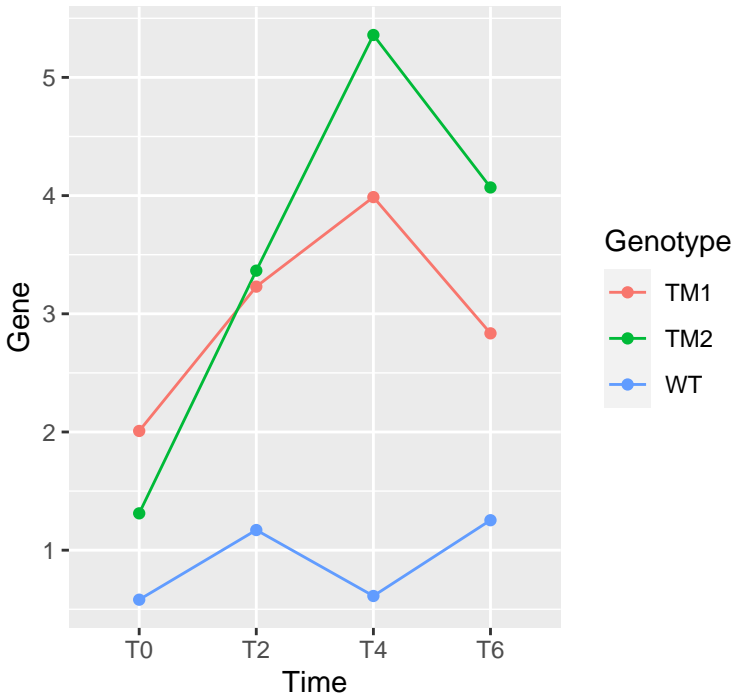



# AT1G49450

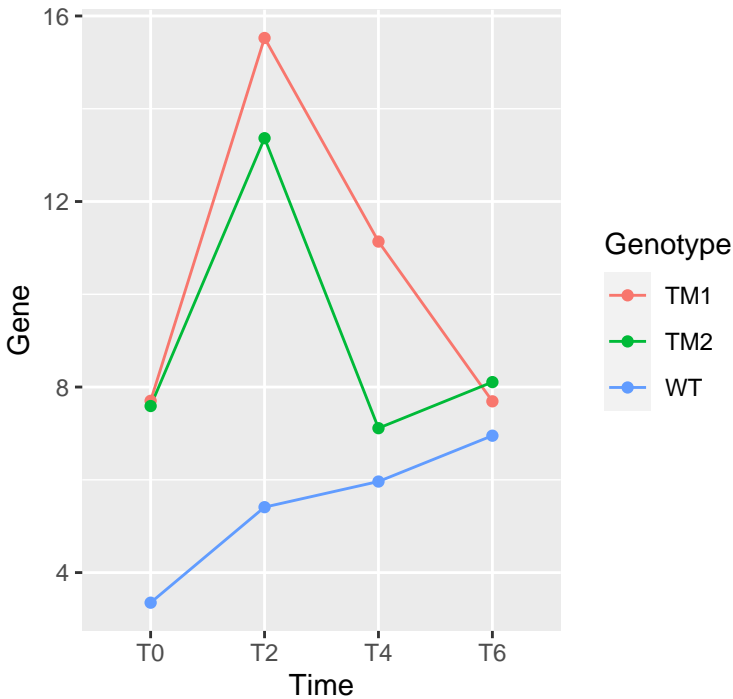

# AT1G49470

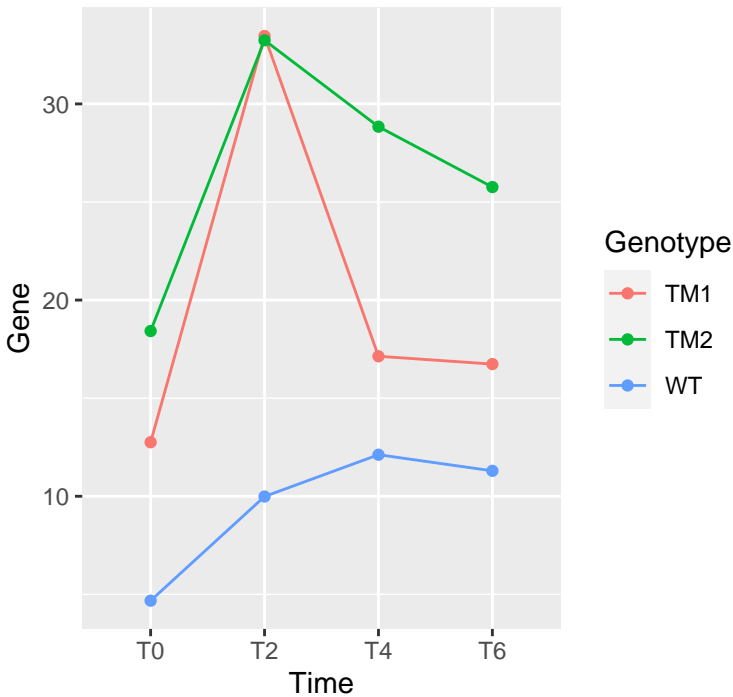

# AT1G51200

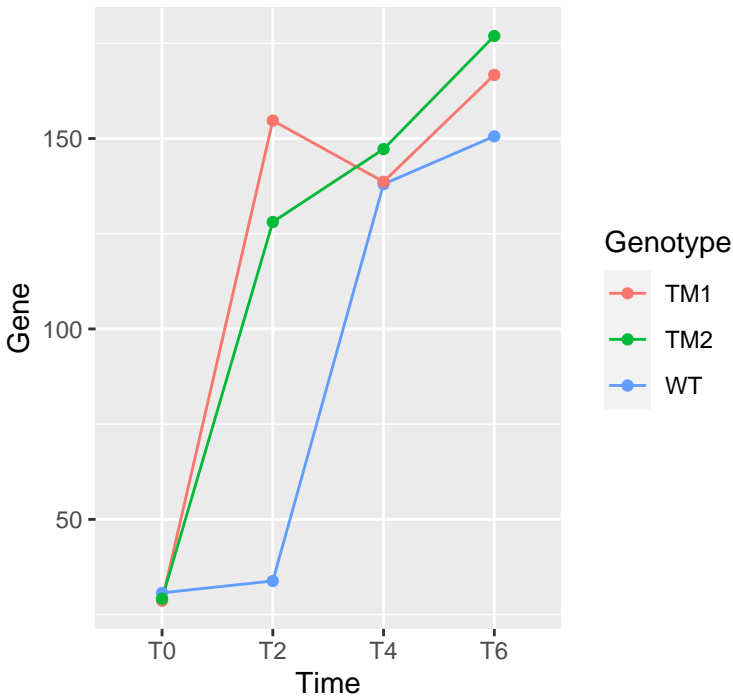

# AT1G51340

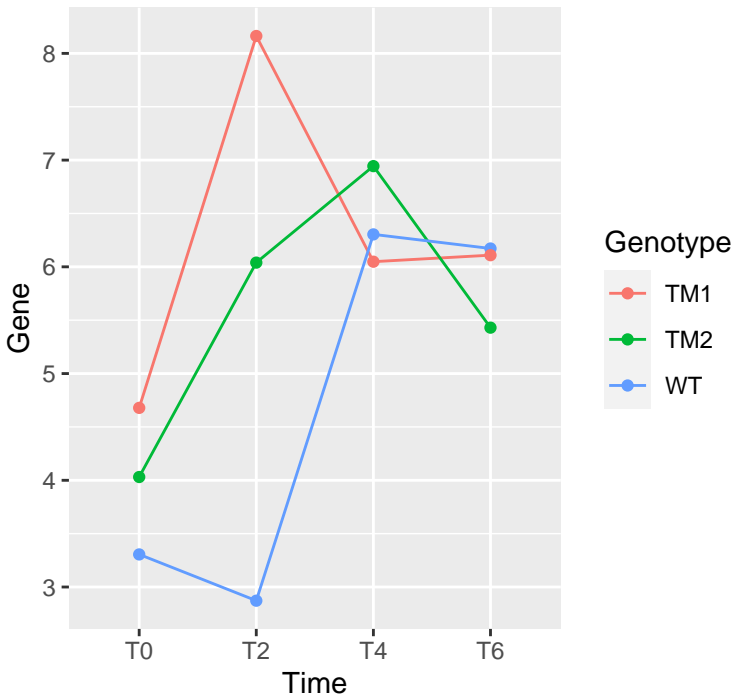

# AT1G51800

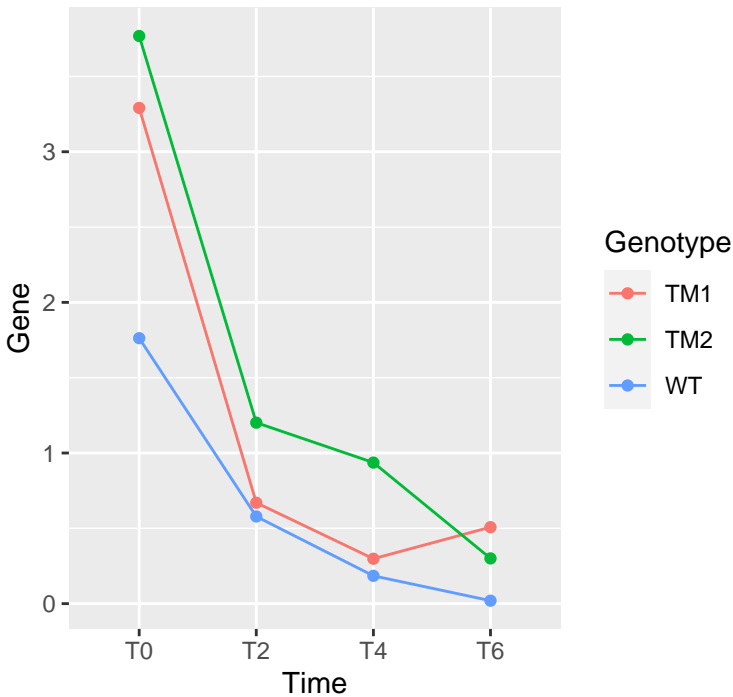

# AT1G52890

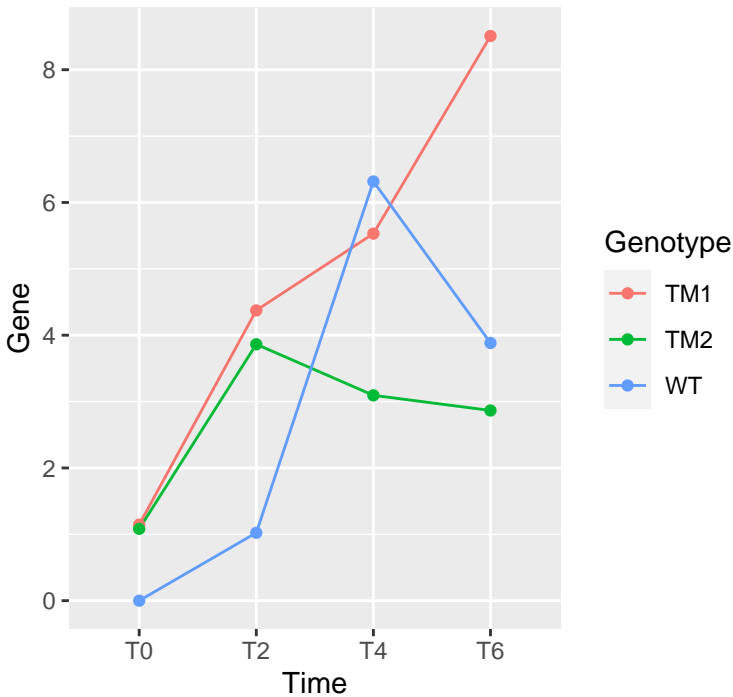

# AT1G53030

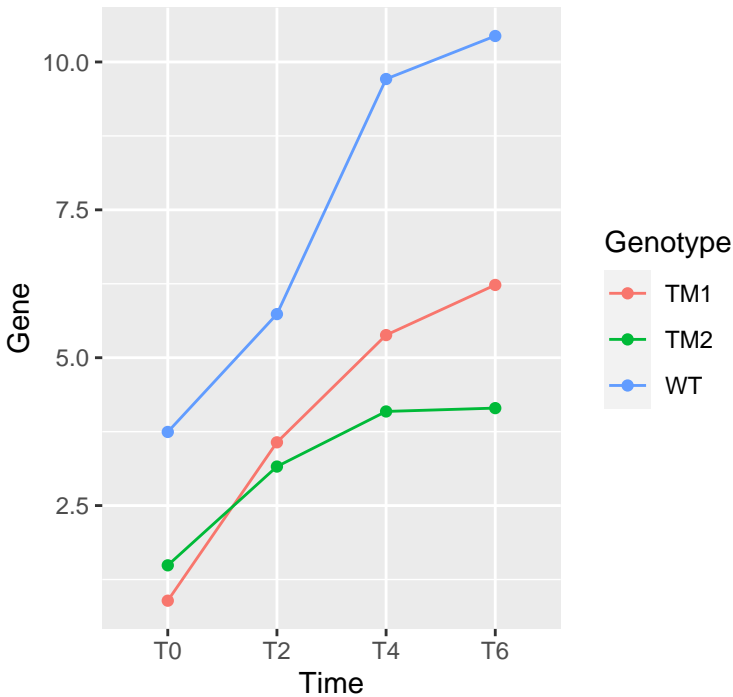

# AT1G54100

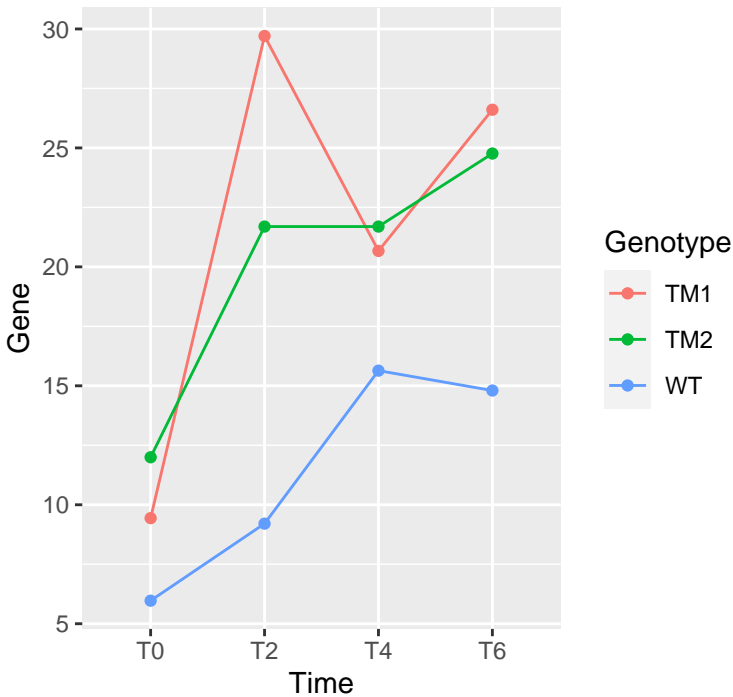



# AT1G54210

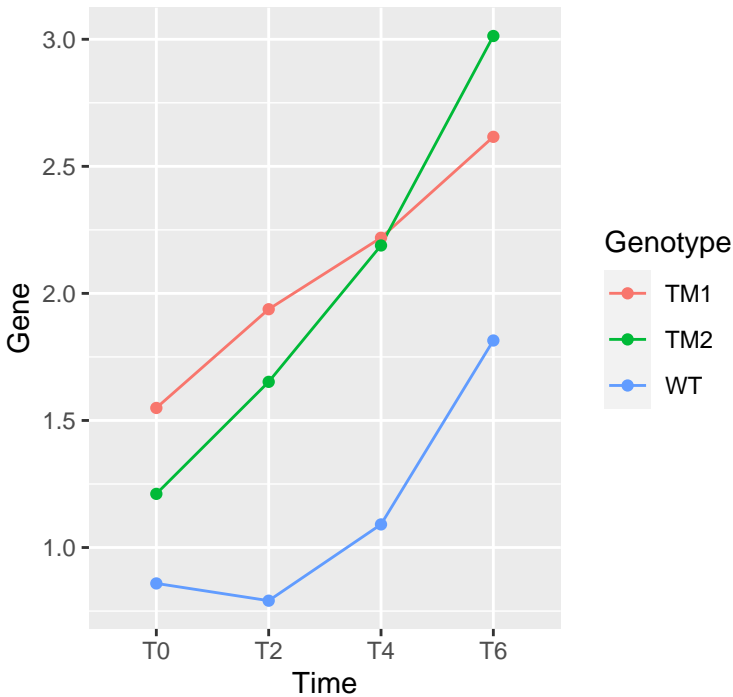

# AT1G54575

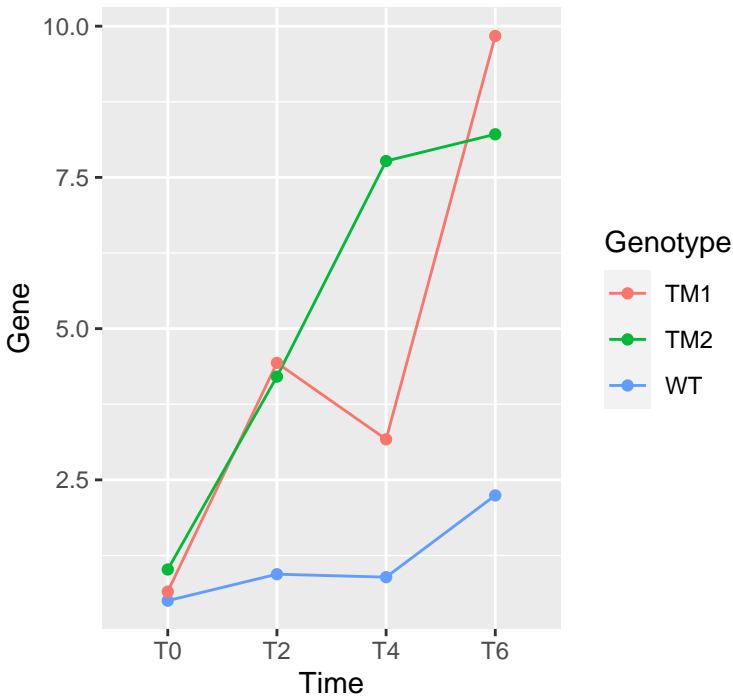

# AT1G54820

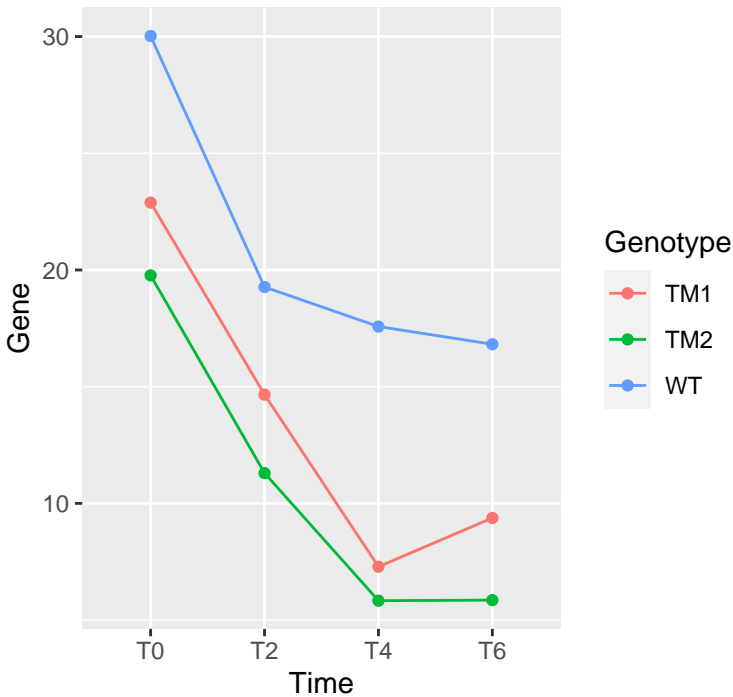

# AT1G55265

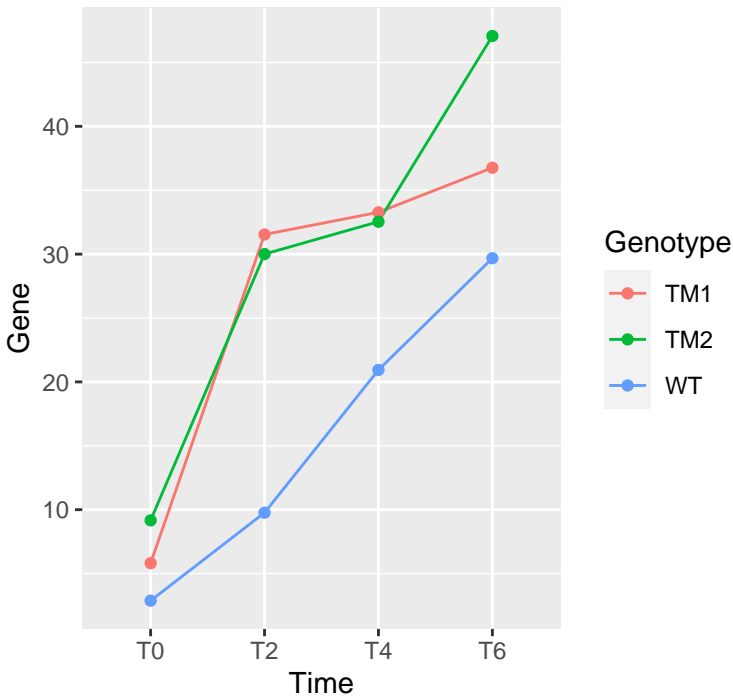

# AT1G56600

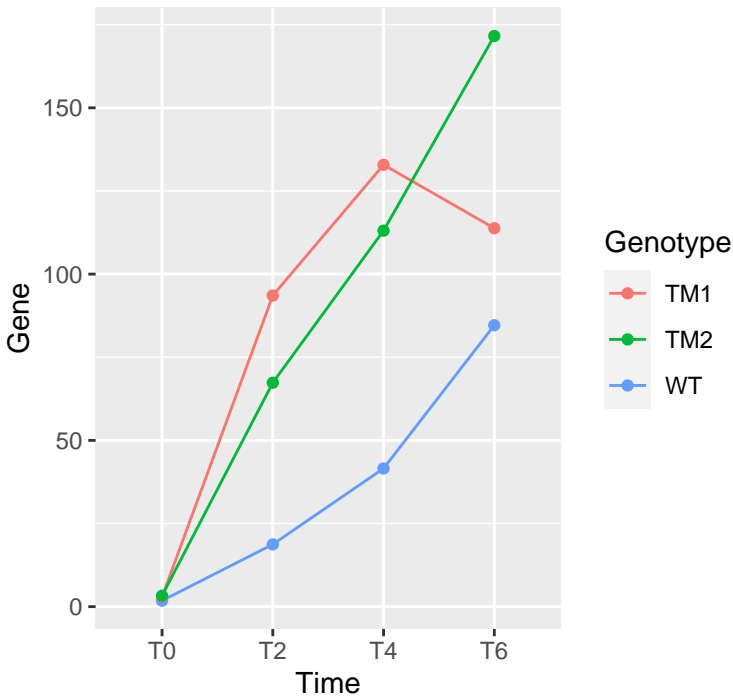

# AT1G56610

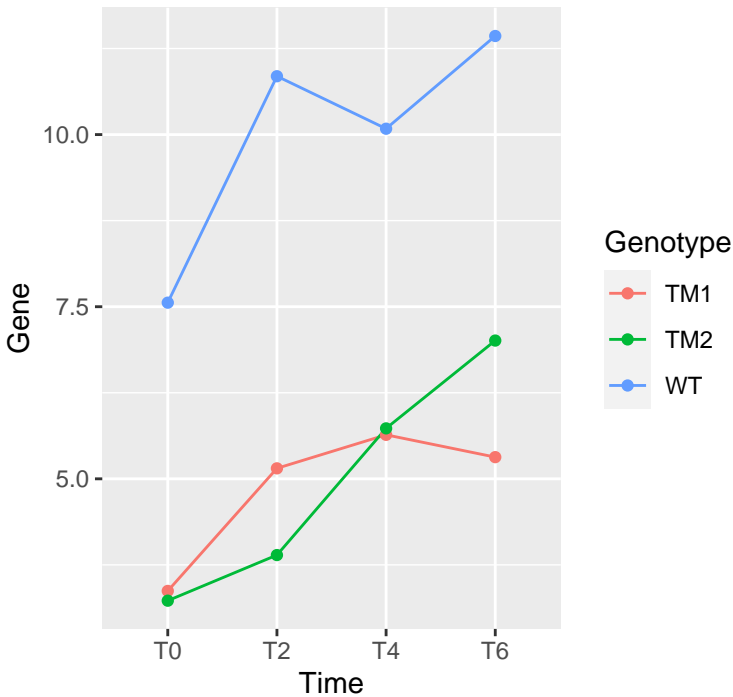

# AT1G58225

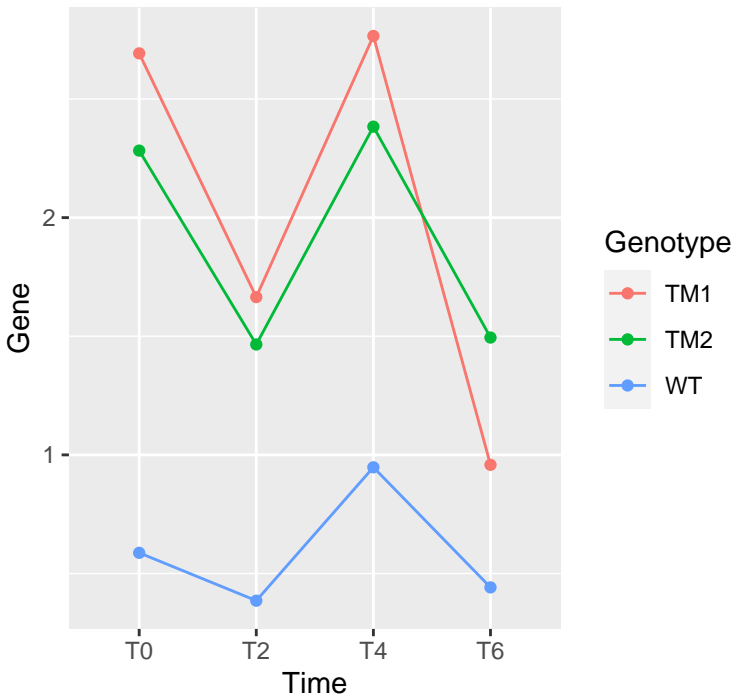

# AT1G58270

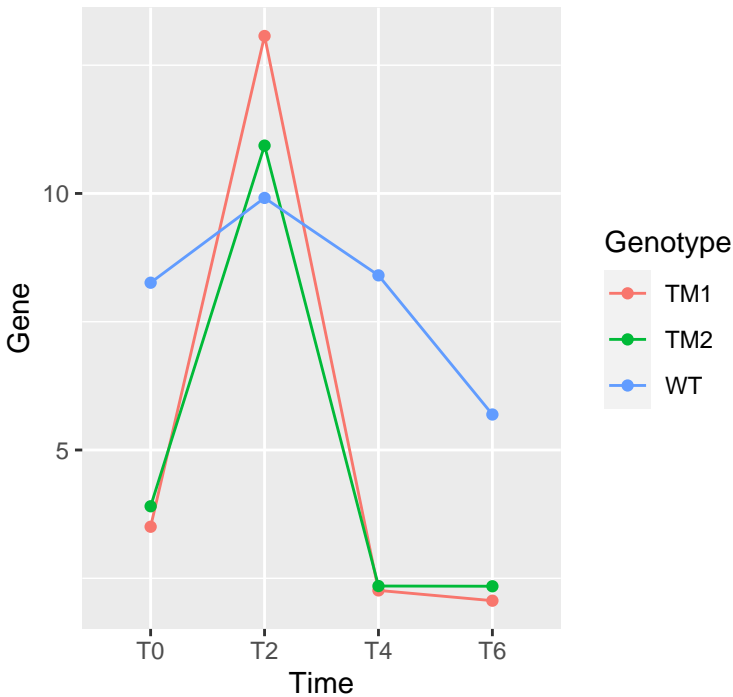



# AT1G60590

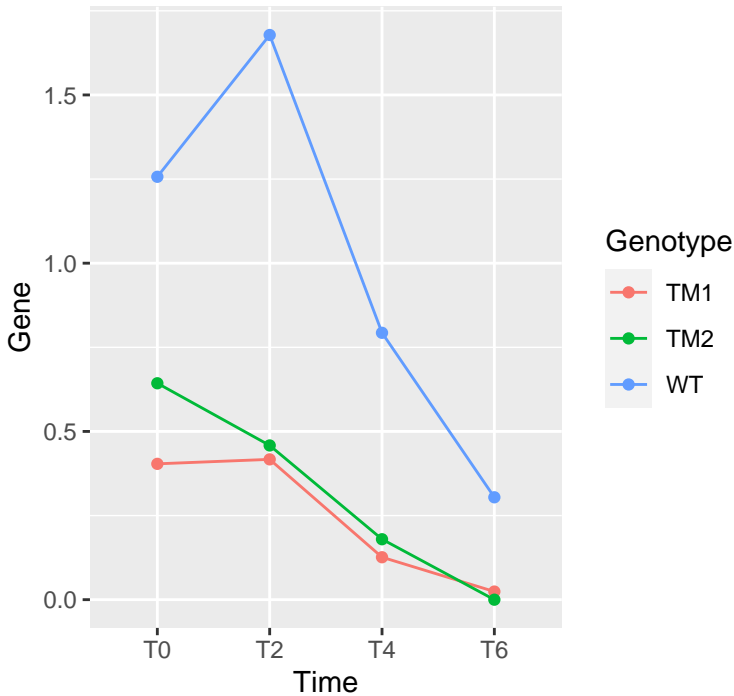

# AT1G61660

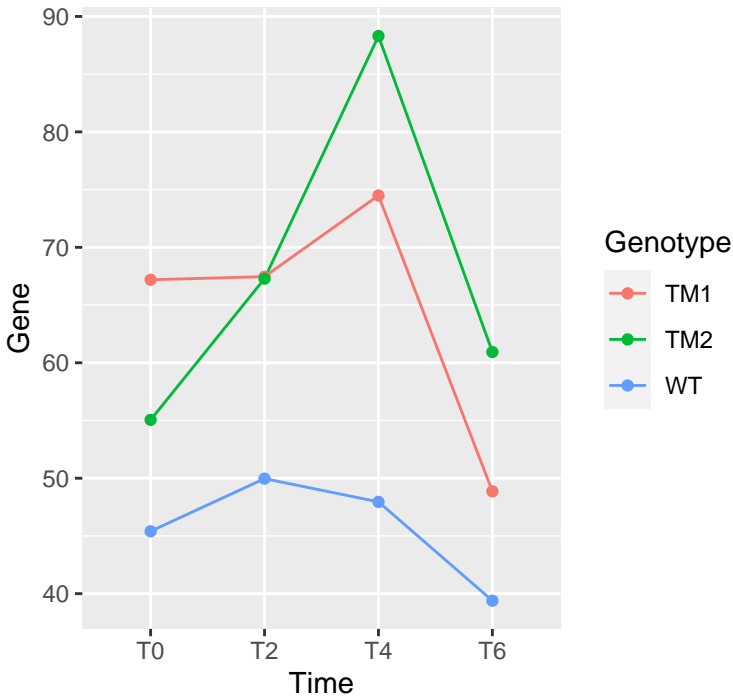

# AT1G62040

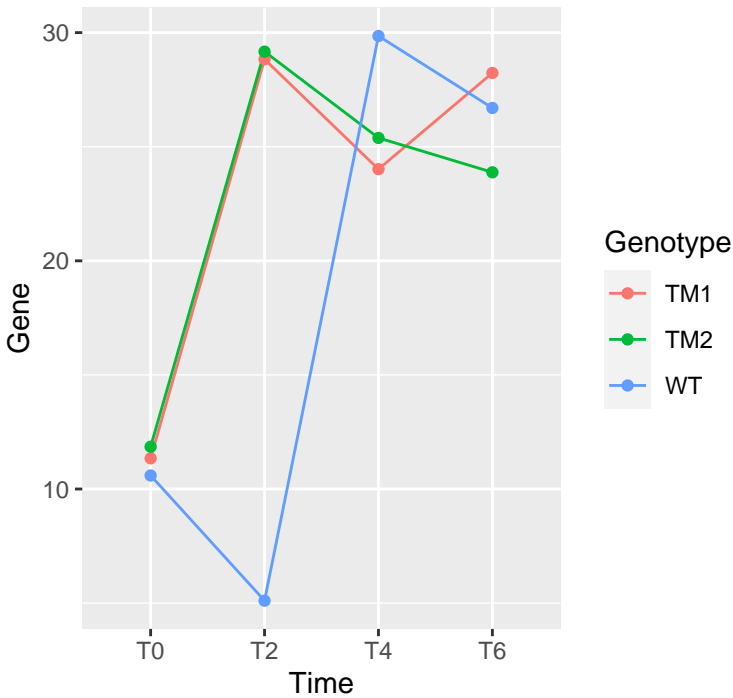

# AT1G62570

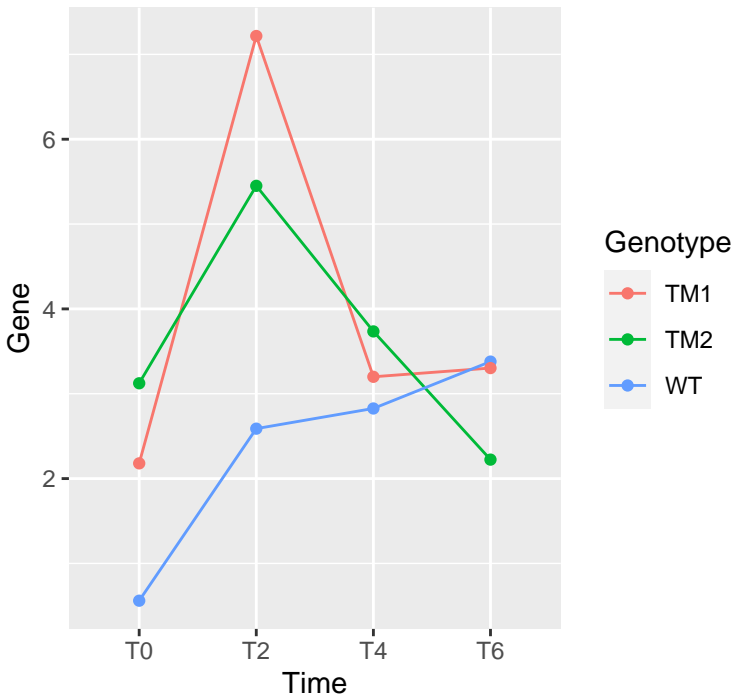

# AT1G63720

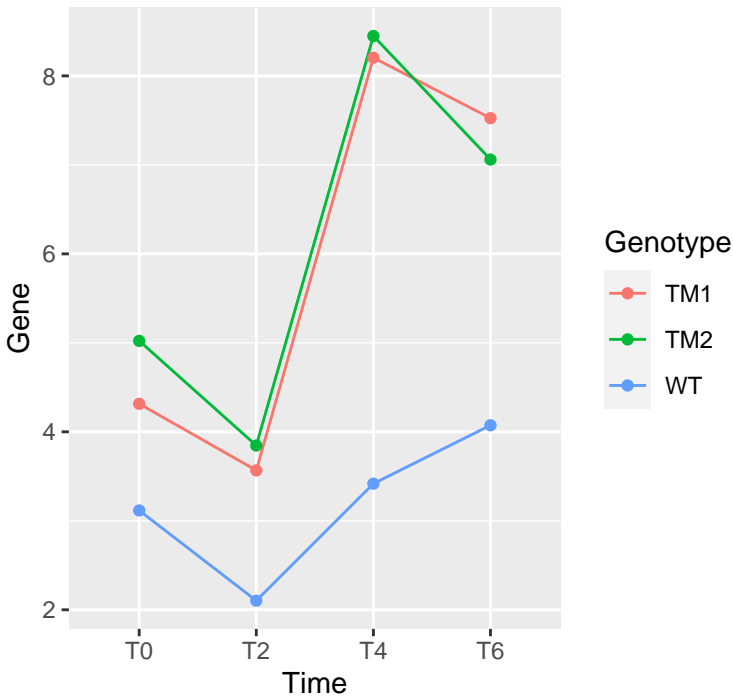

# AT1G64390

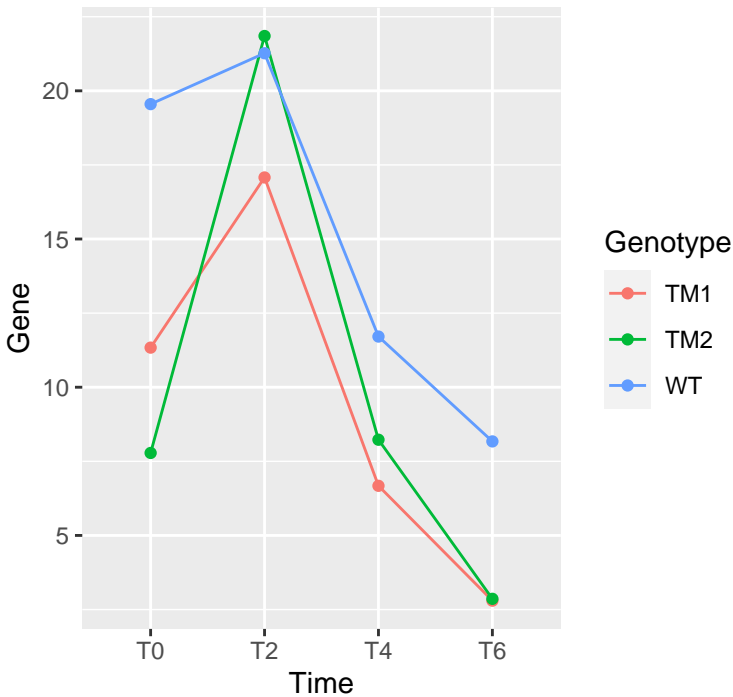

# AT1G64640

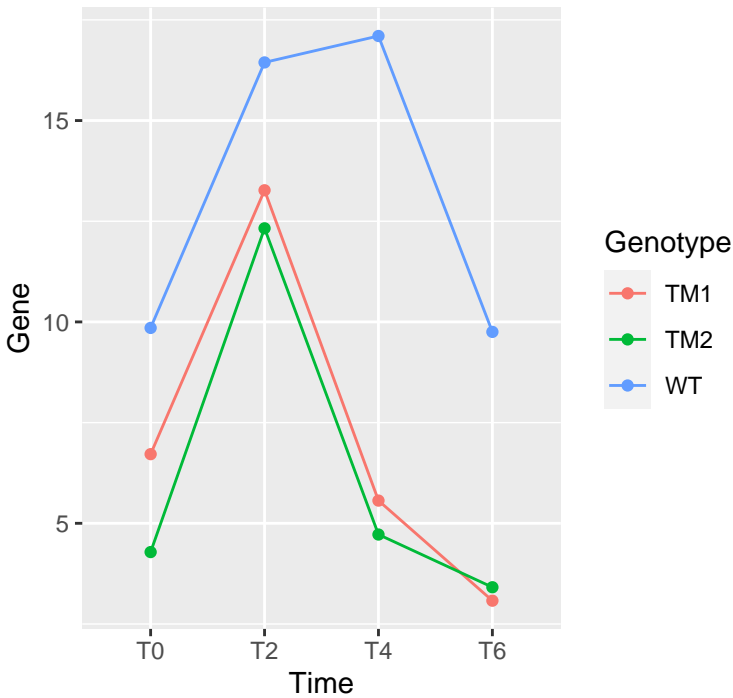

# AT1G64670

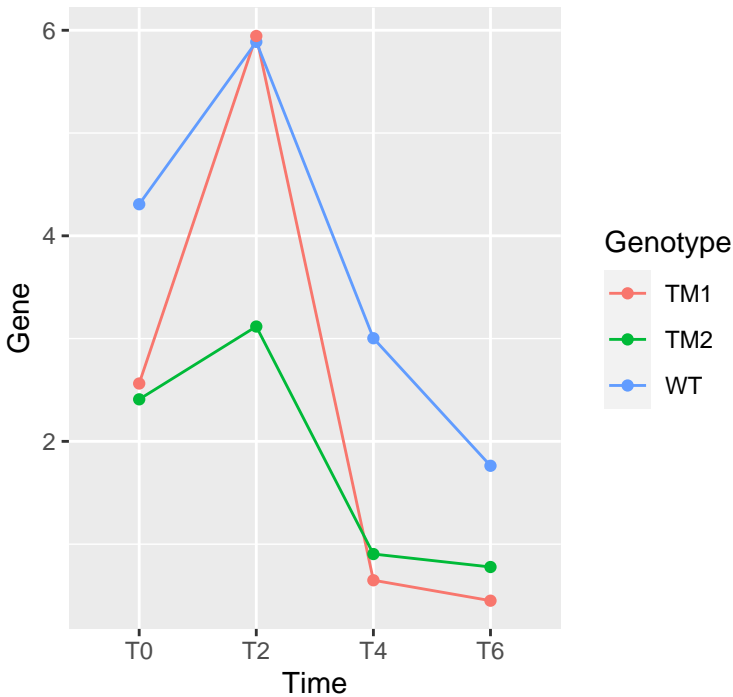



# AT1G64780

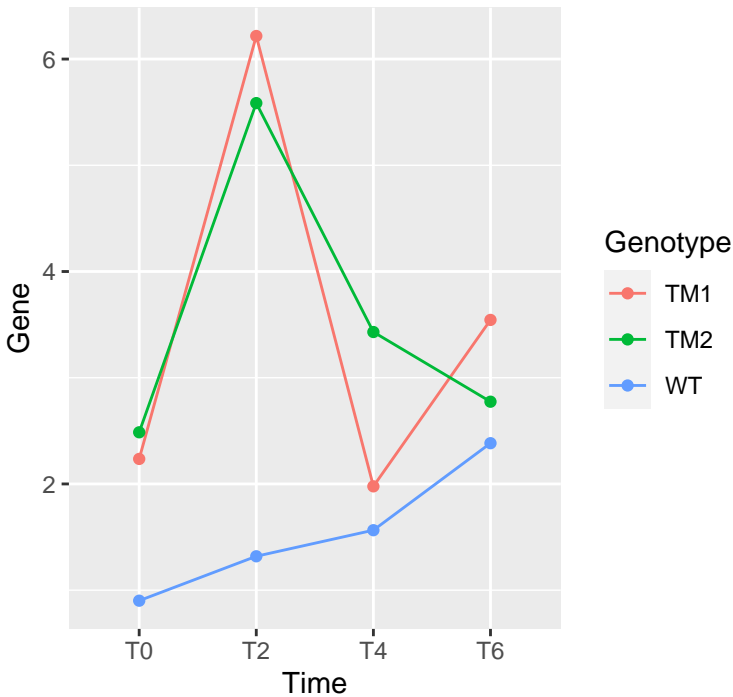

# AT1G64790

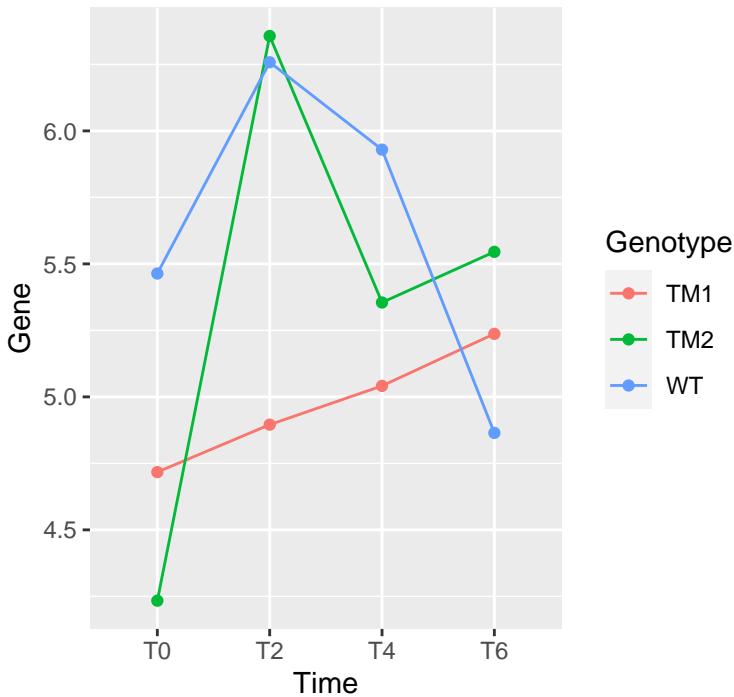

# AT1G65480

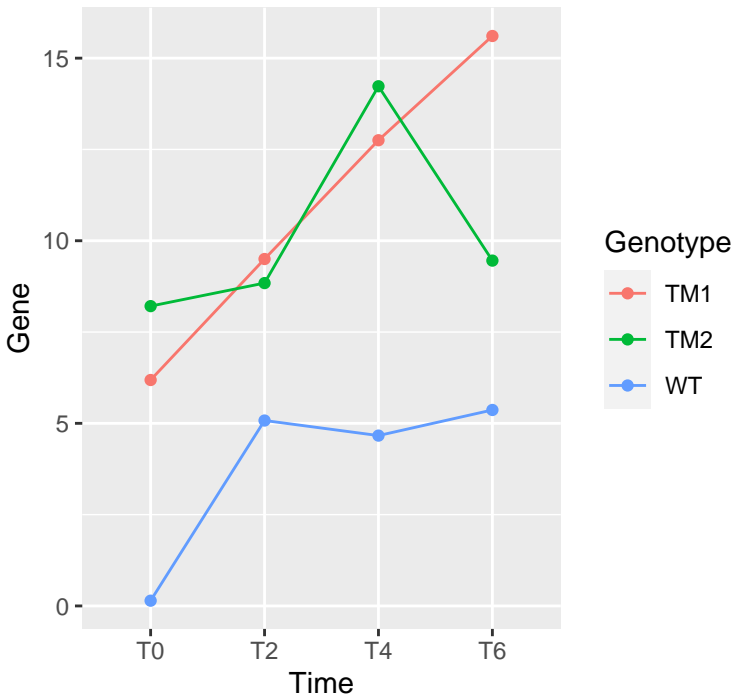

# AT1G65690

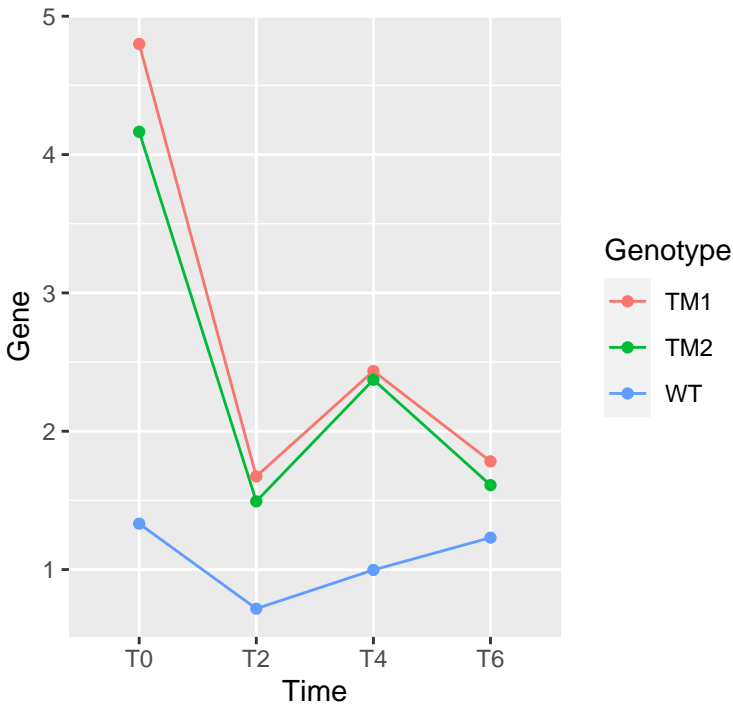

# AT1G66540

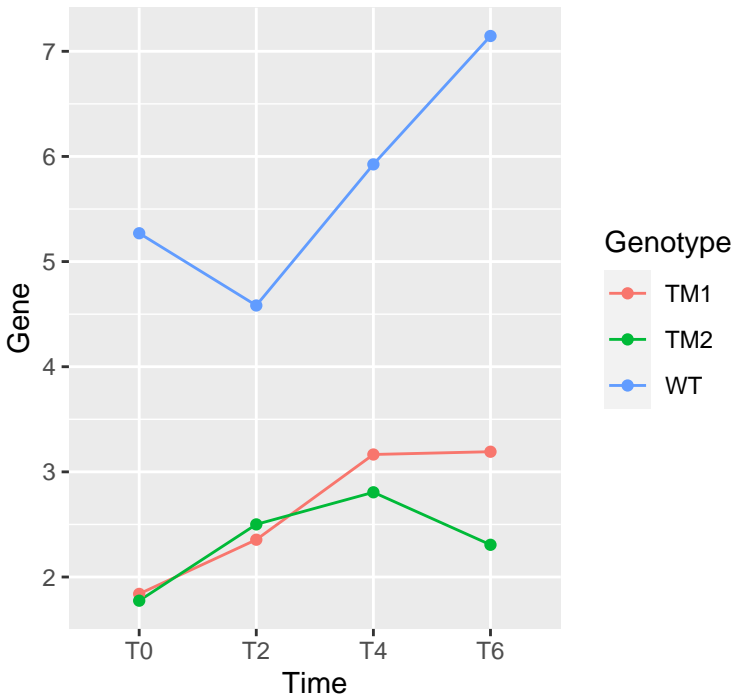

# AT1G66920

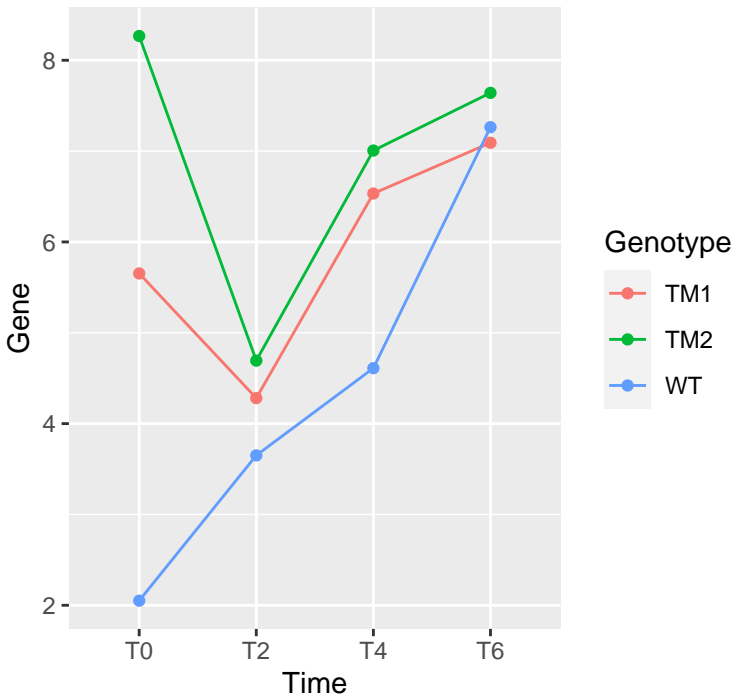

# AT1G67500

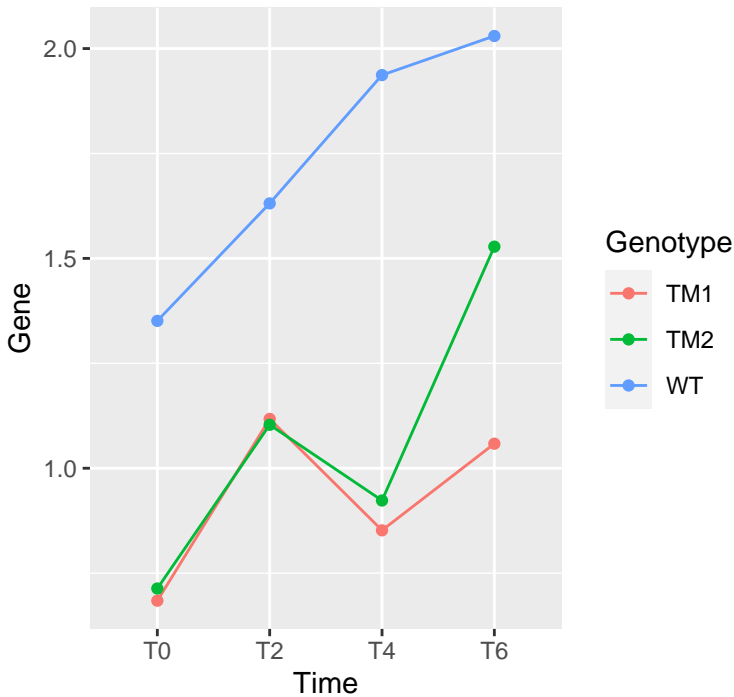

# AT1G67750

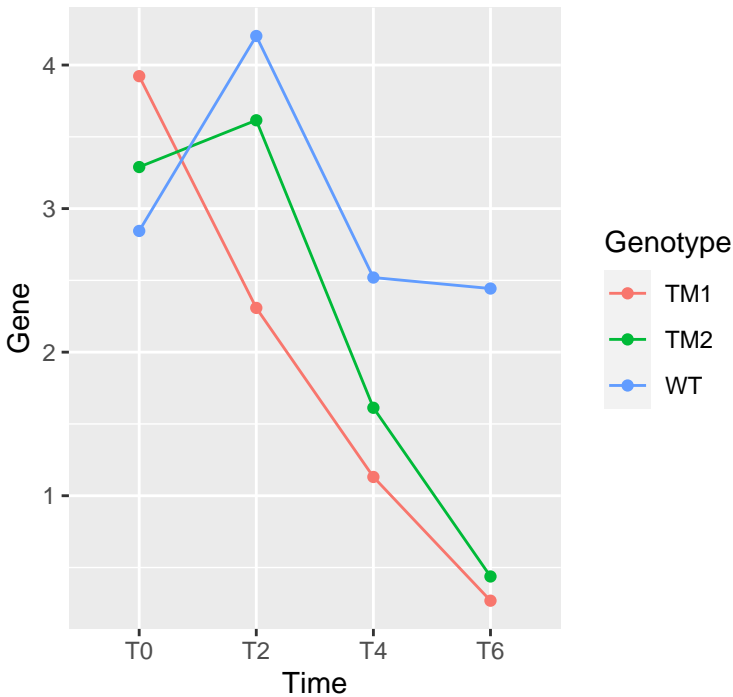



# AT1G67810

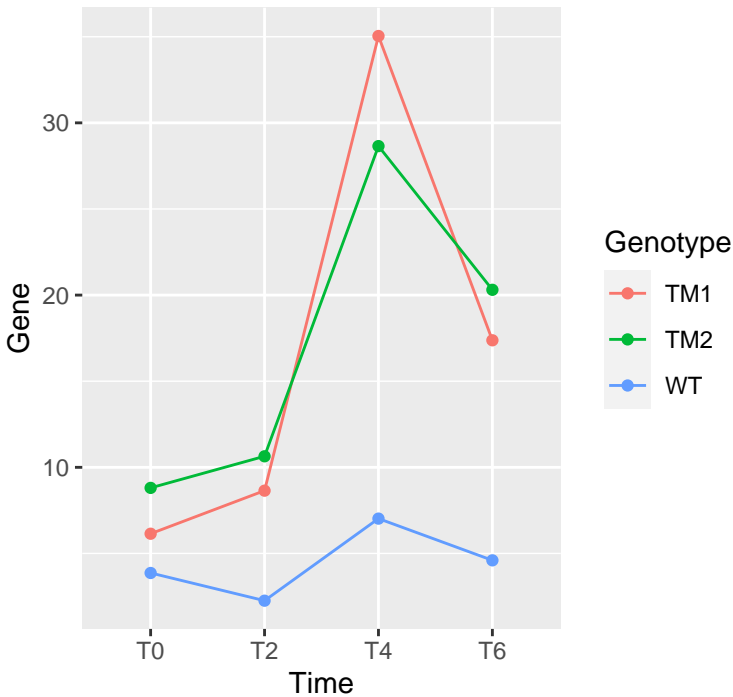

# AT1G67865

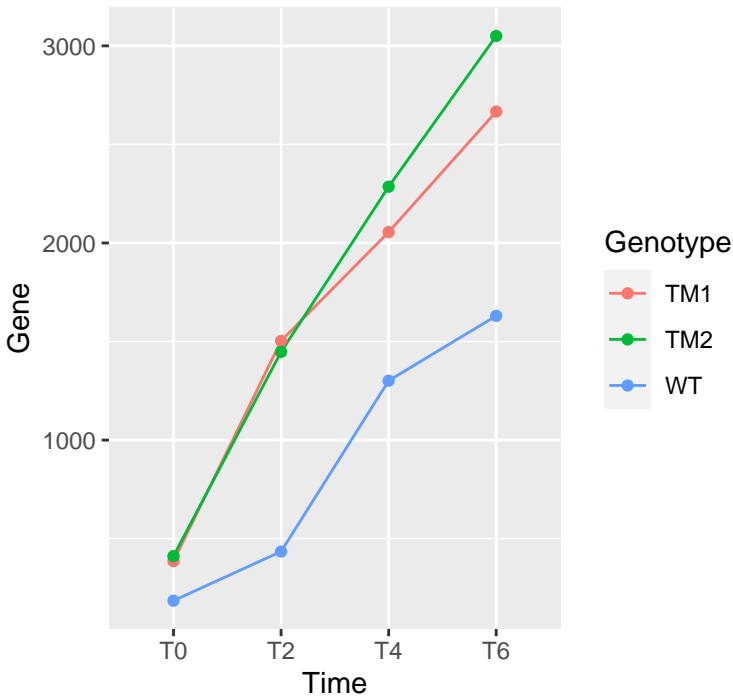

# AT1G68530

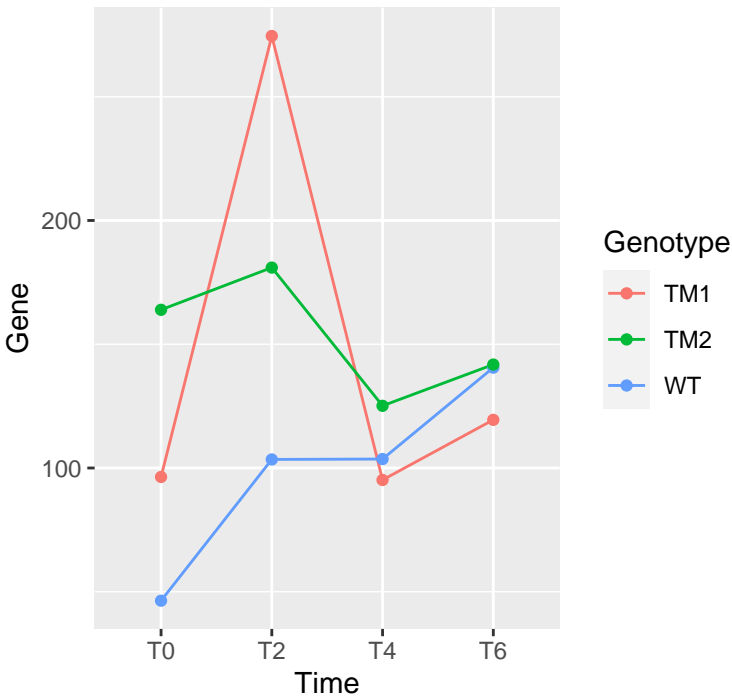

# AT1G68570

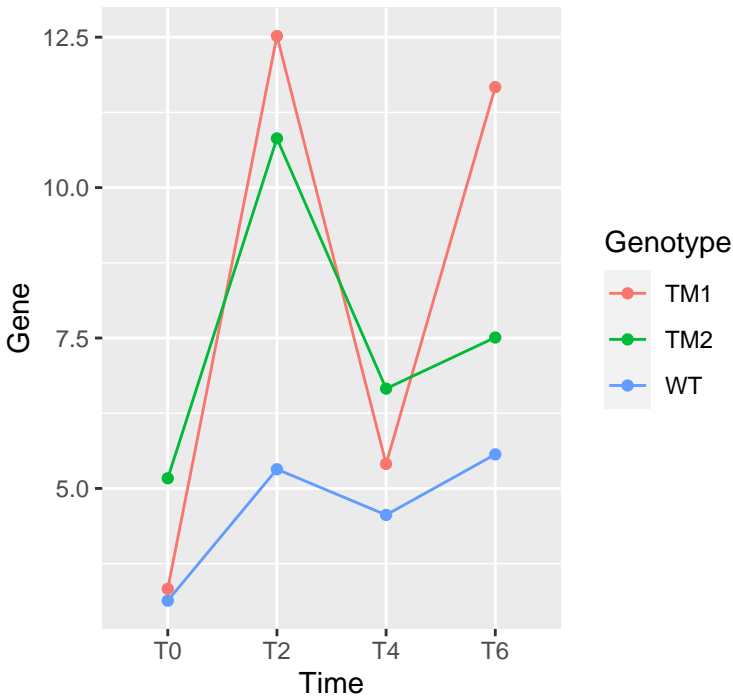

# AT1G69040

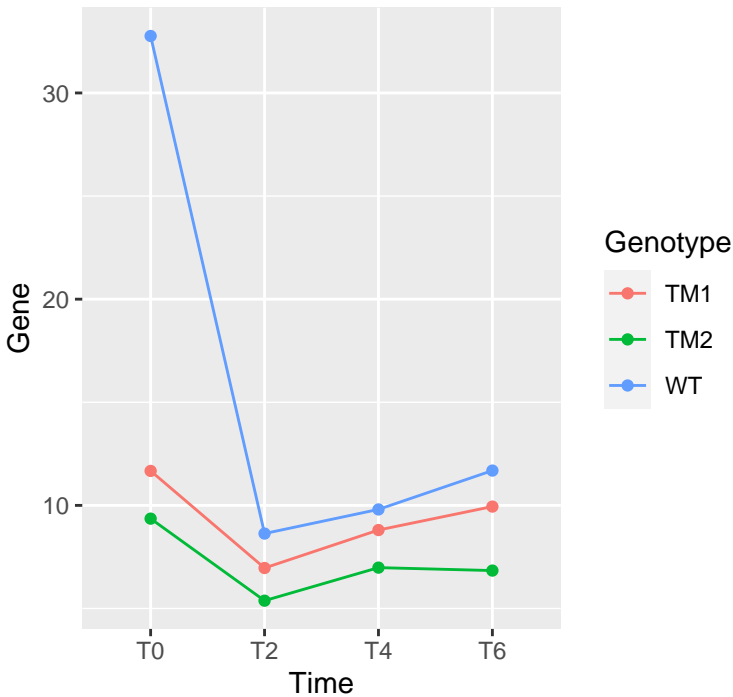

# AT1G69260

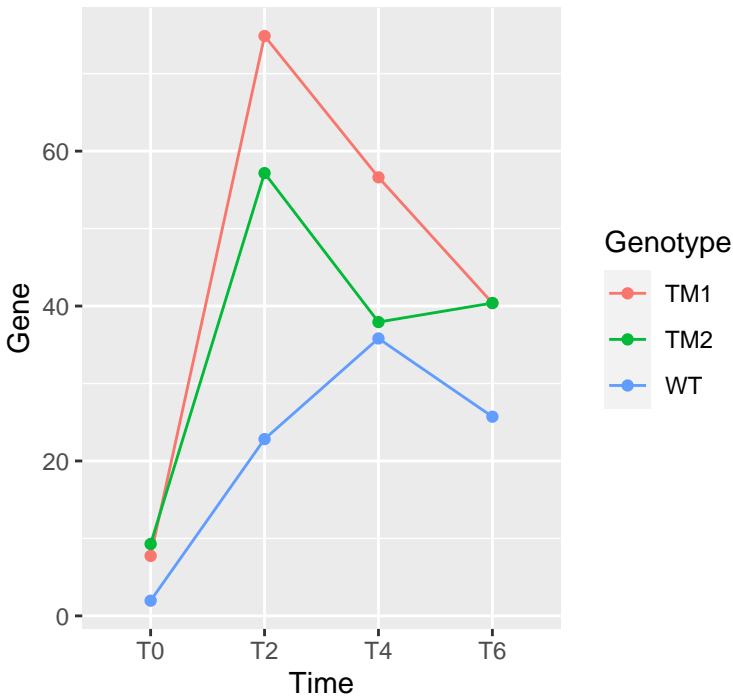

# AT1G69310

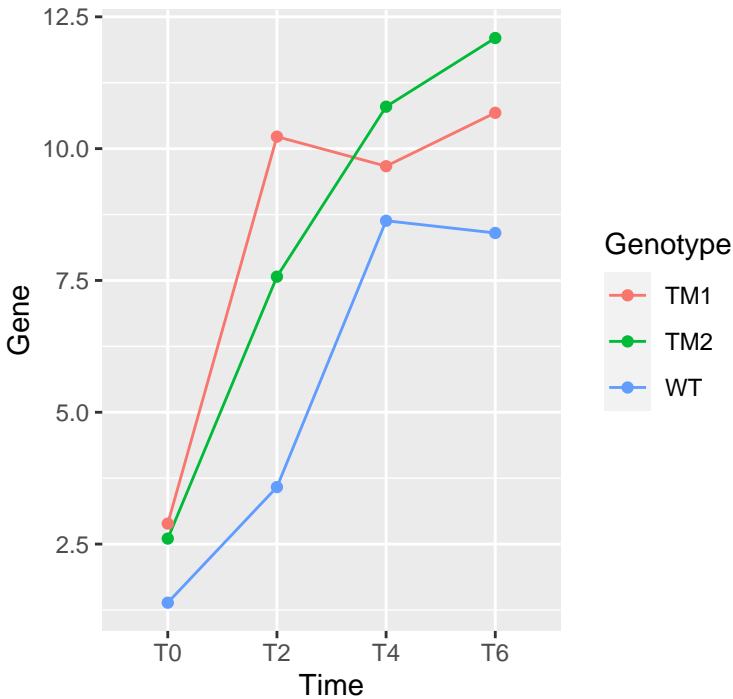

# AT1G69410

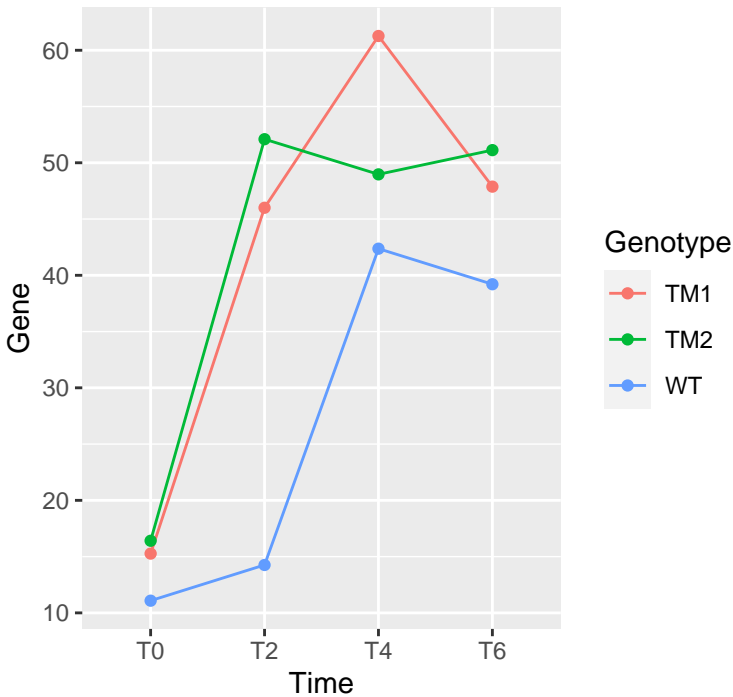



# AT1G69490

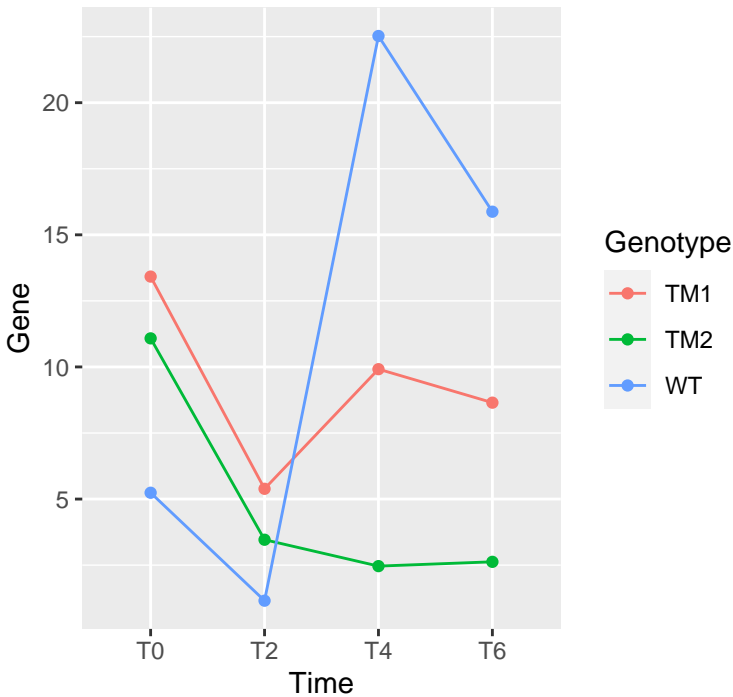

# AT1G70140

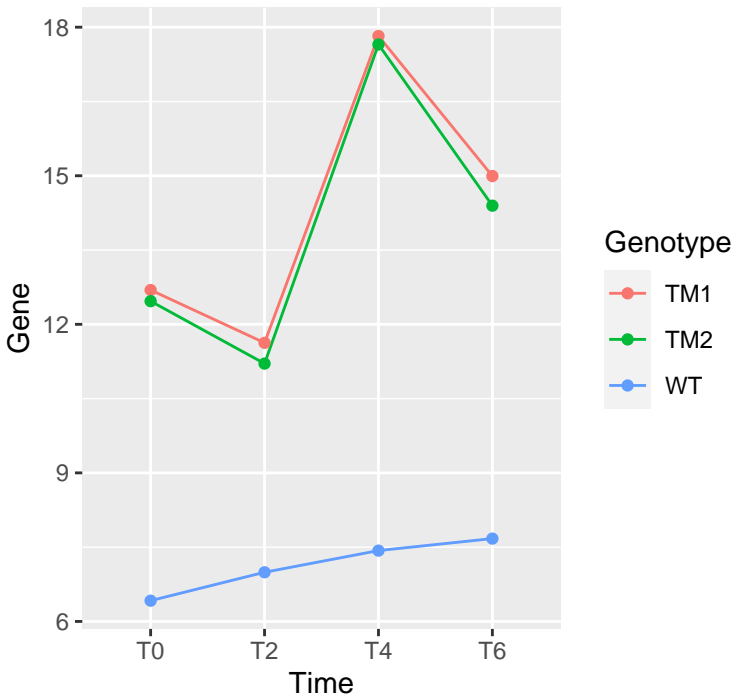

# AT1G70210

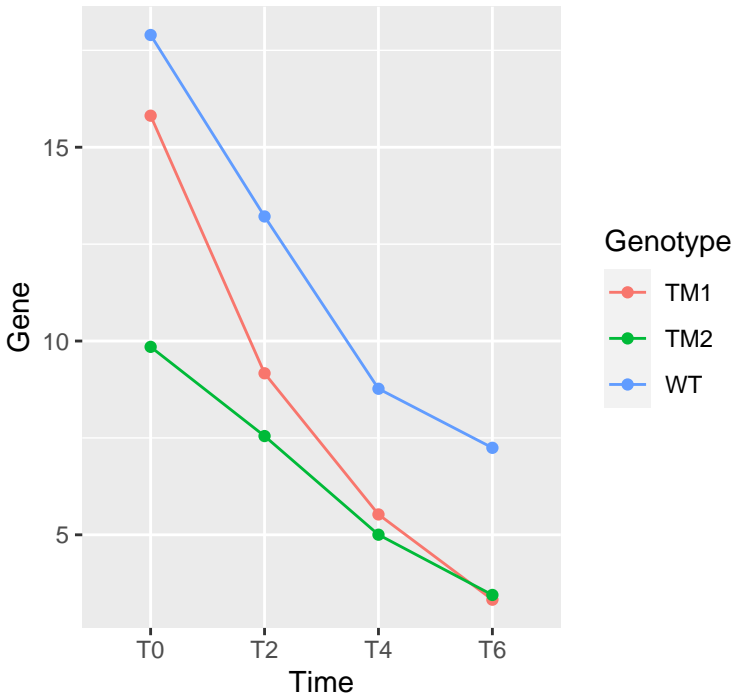

# AT1G70895

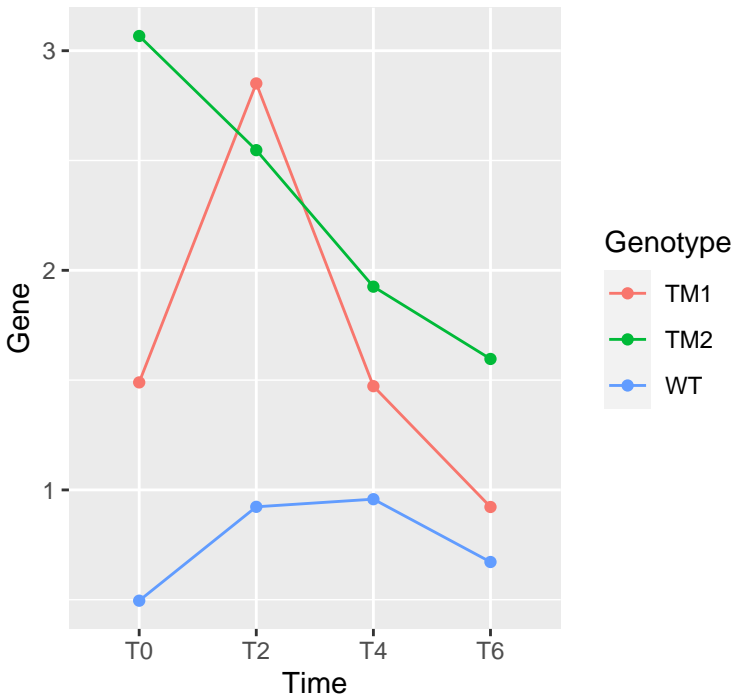

# AT1G71130

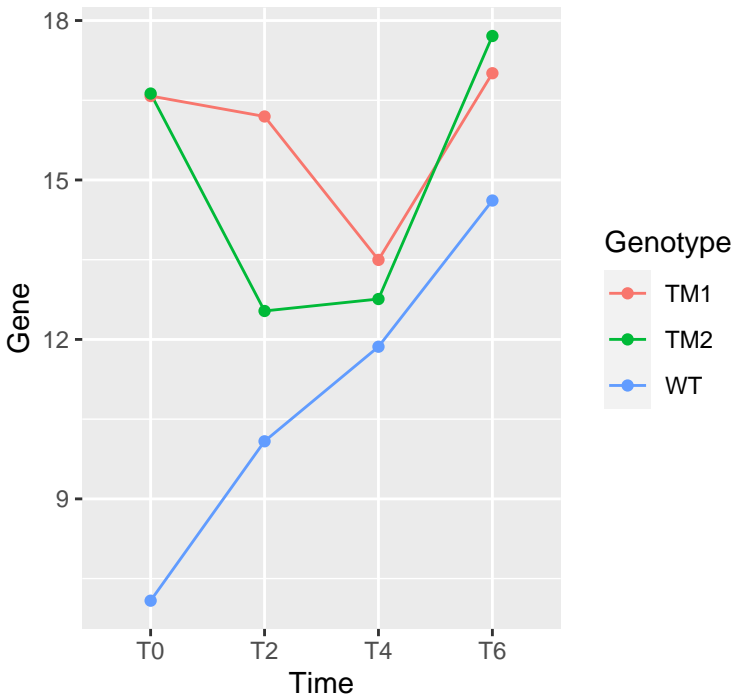

# AT1G71697

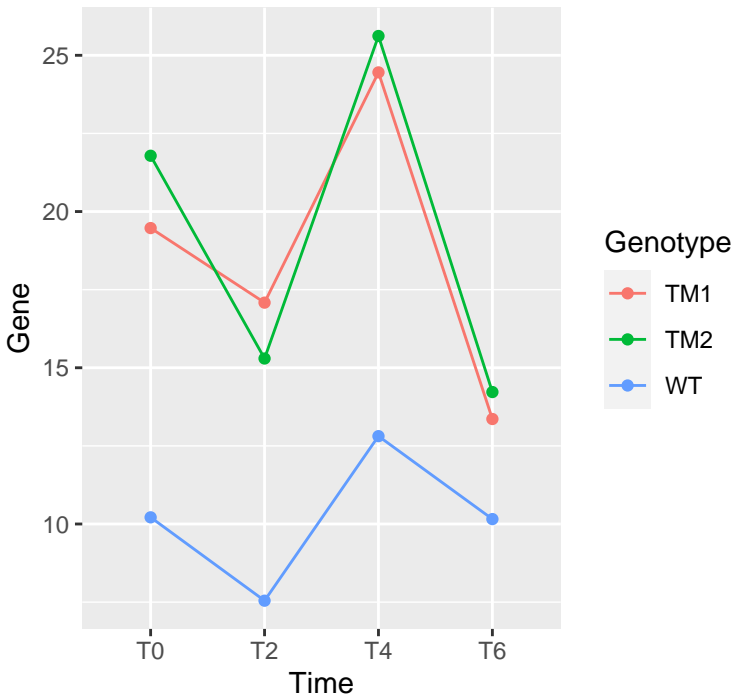

# AT1G72520

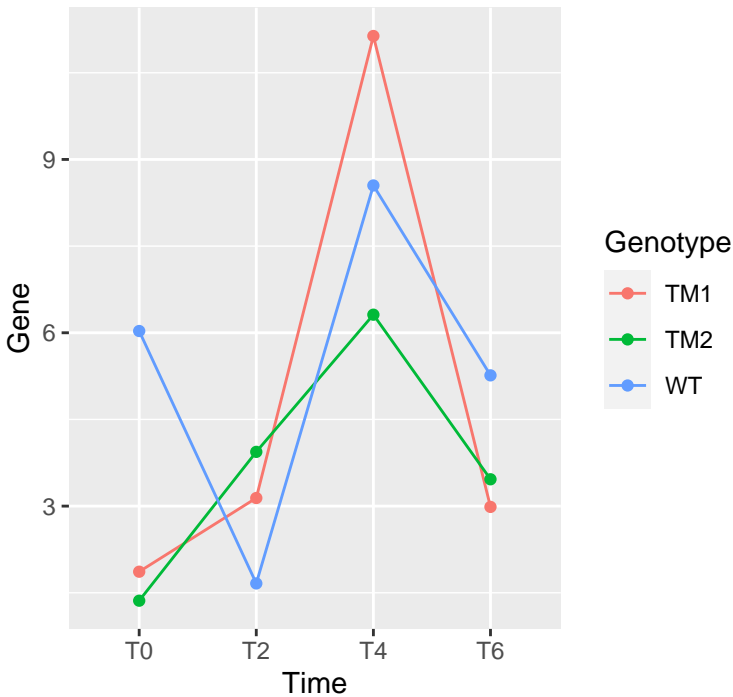

# AT1G72800

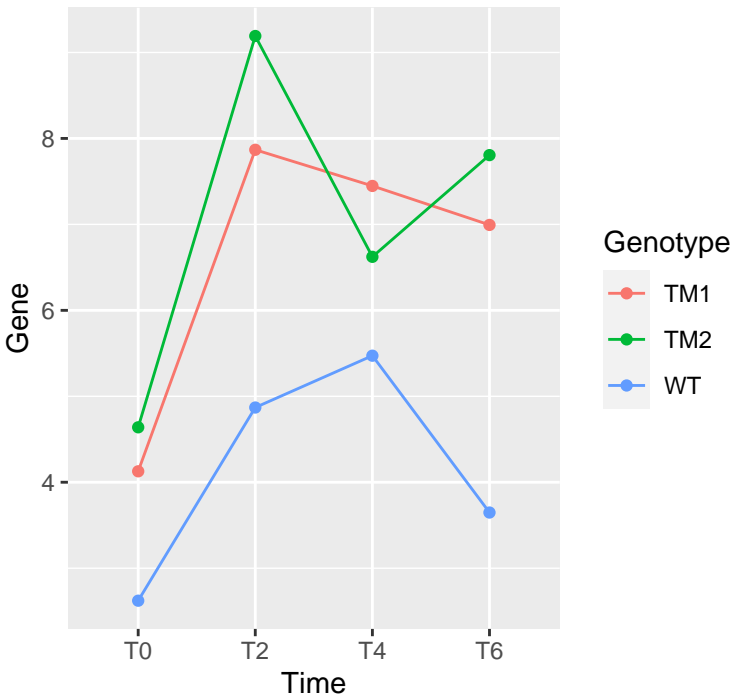



# AT1G73680

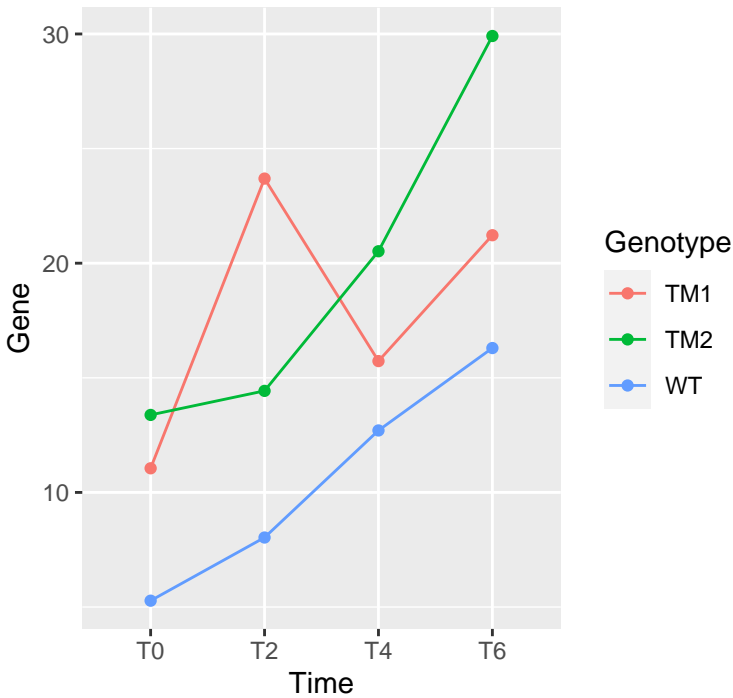

# AT1G73810

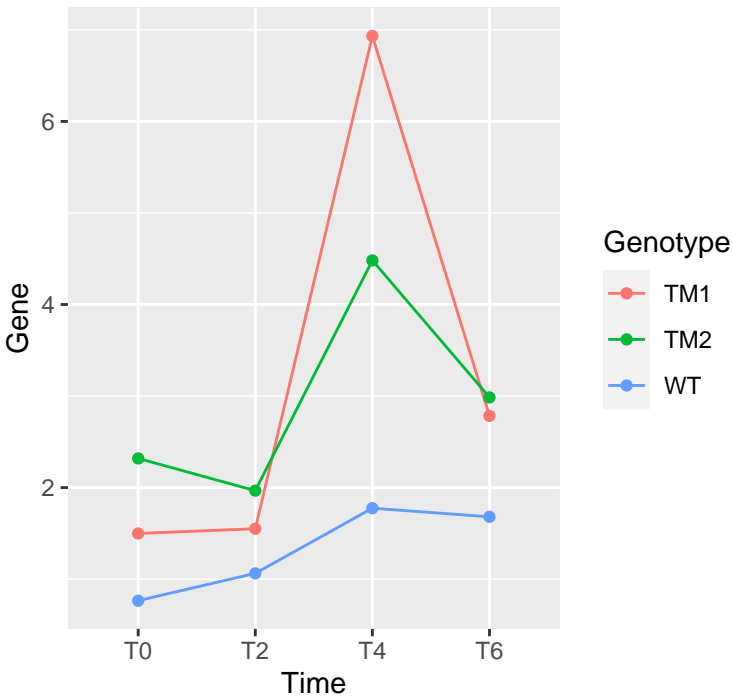

# AT1G74070

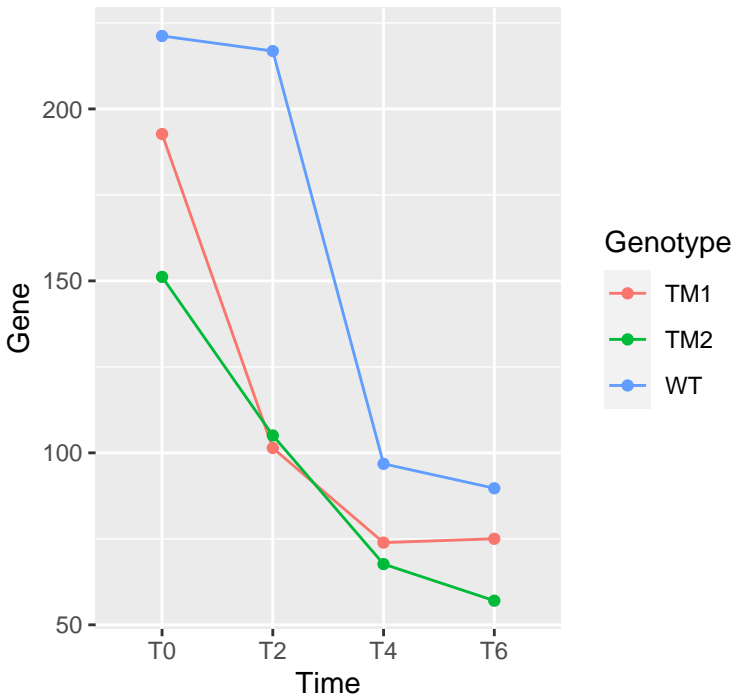

# AT1G74930

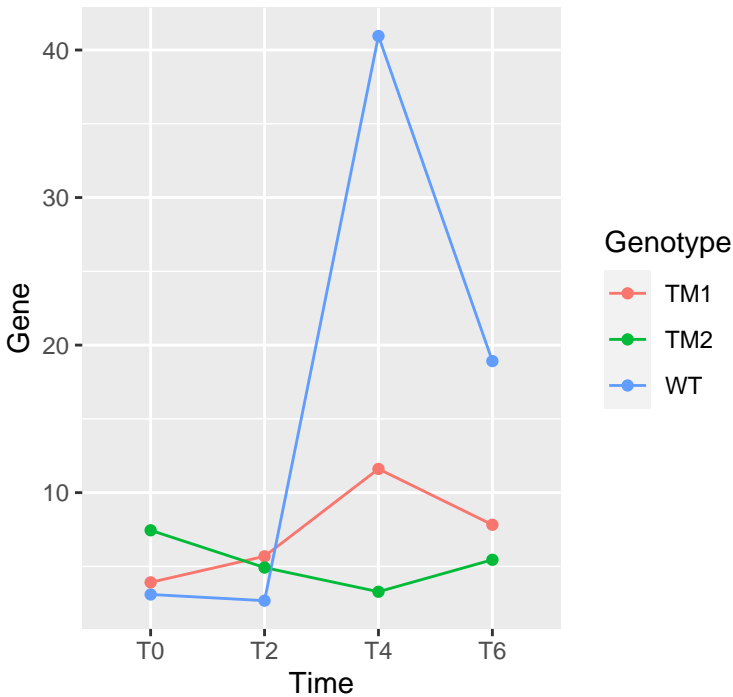

# AT1G76980

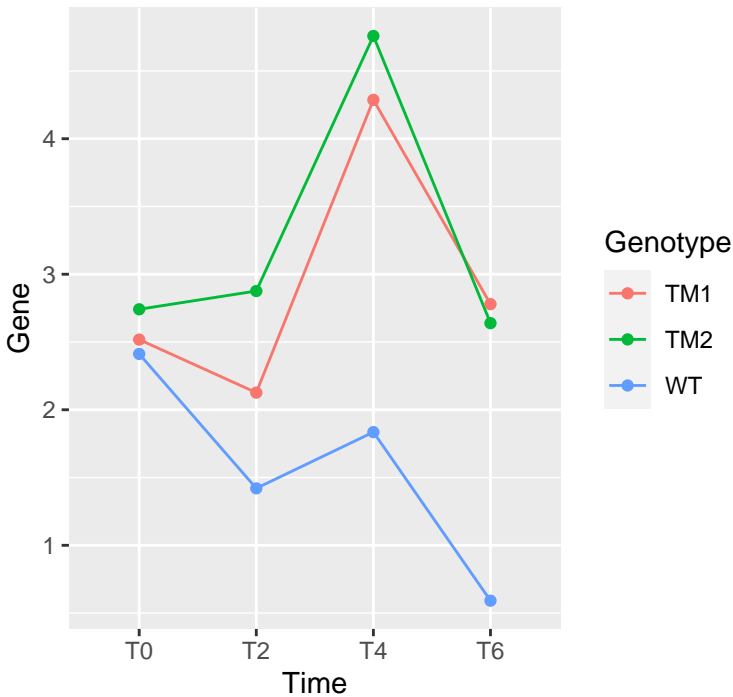

# AT1G77450

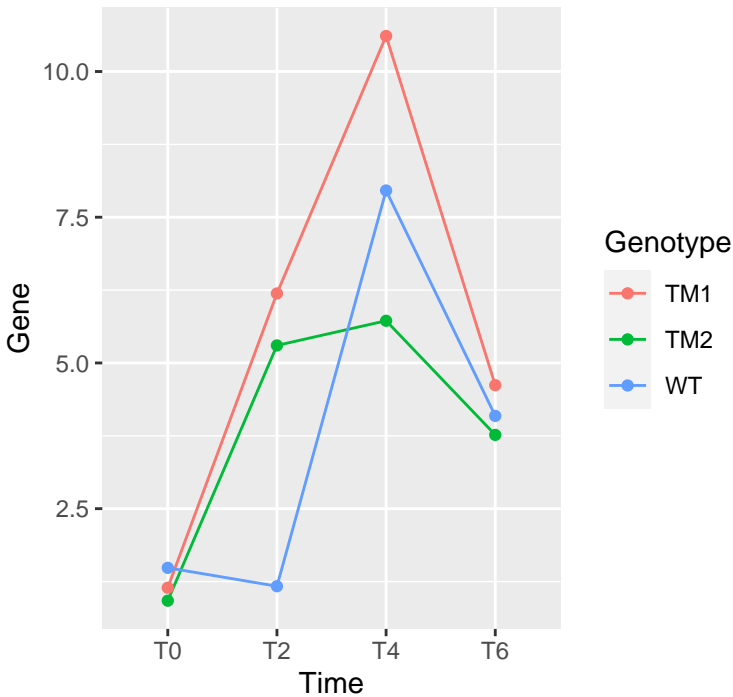

# AT1G77760

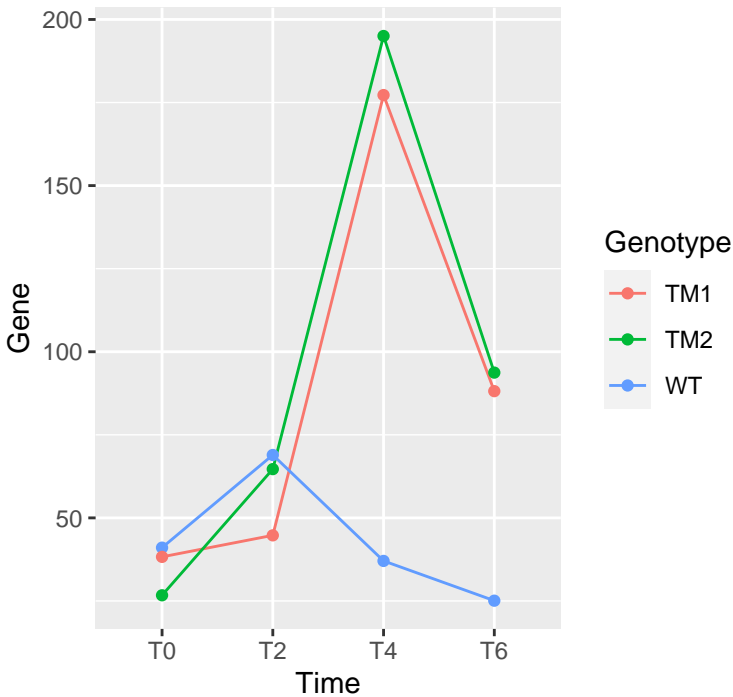

# AT1G78070

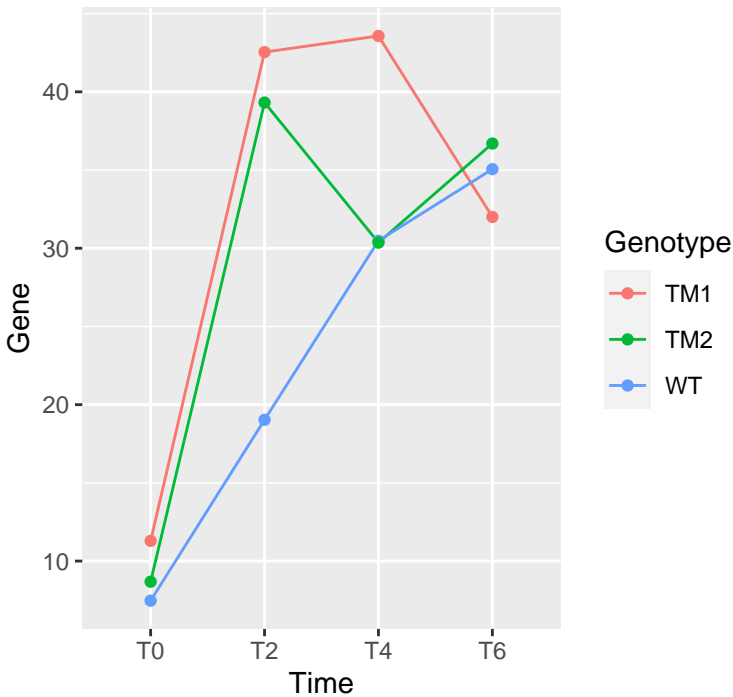



# AT1G80130

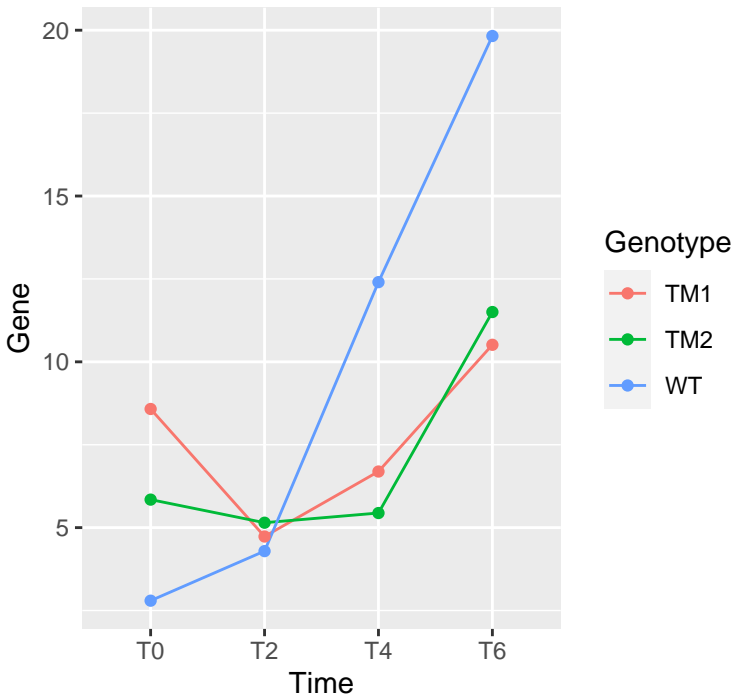

# AT1G80760

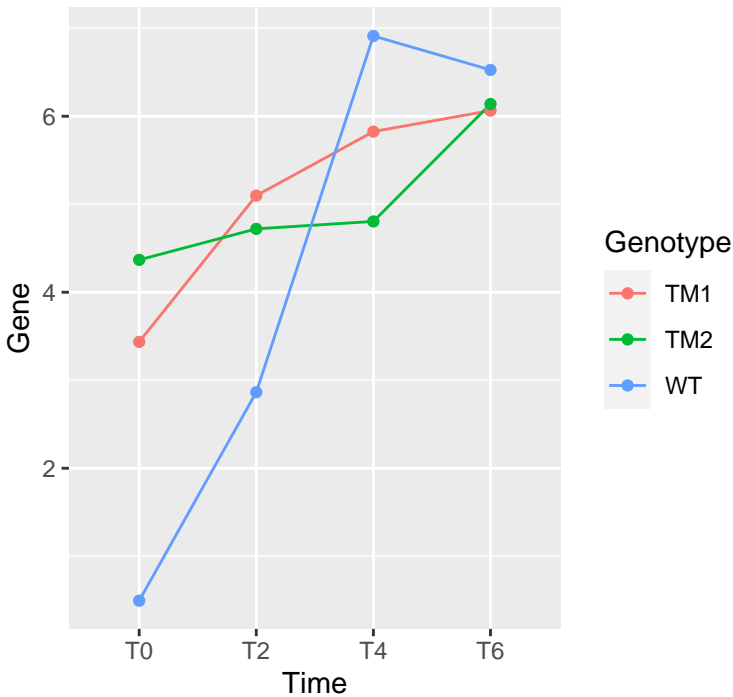

# AT1G80830

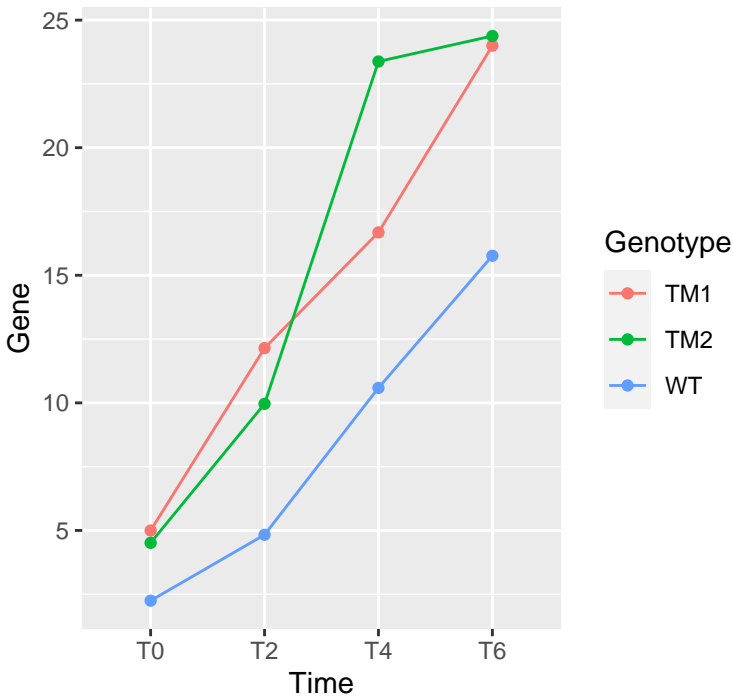

# AT2G01830

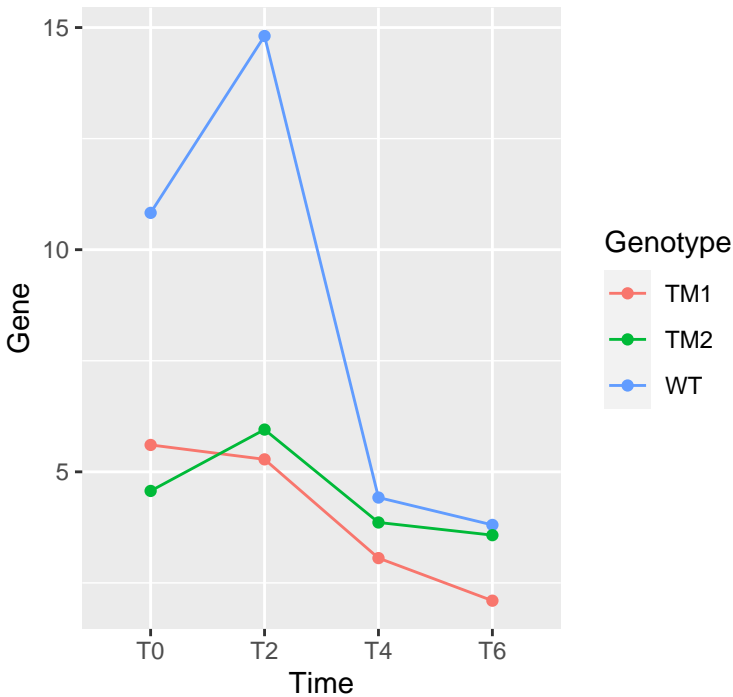

# AT2G04495

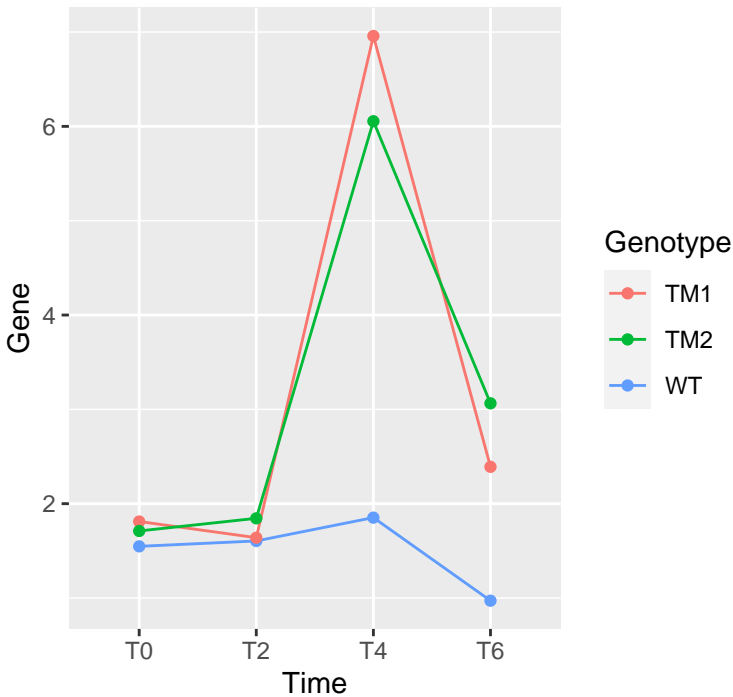

# AT2G13610

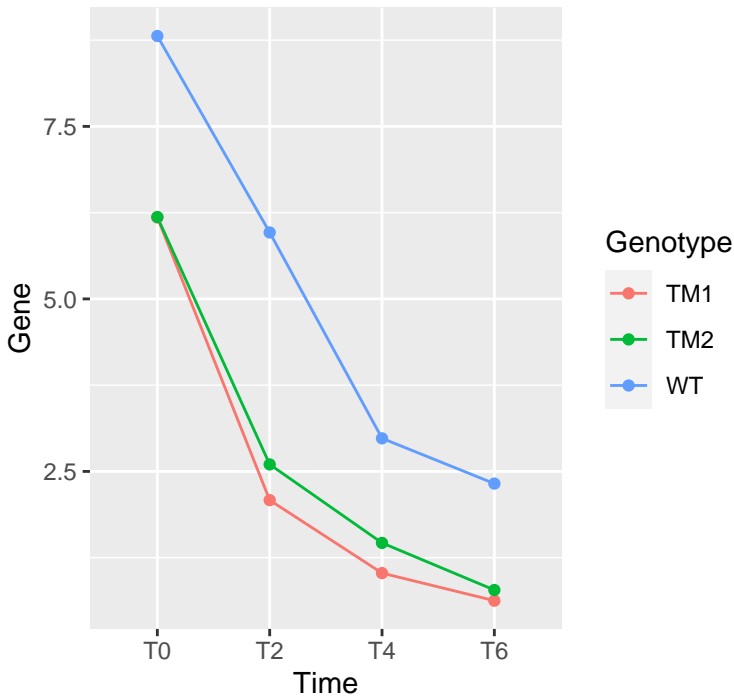

# AT2G14247

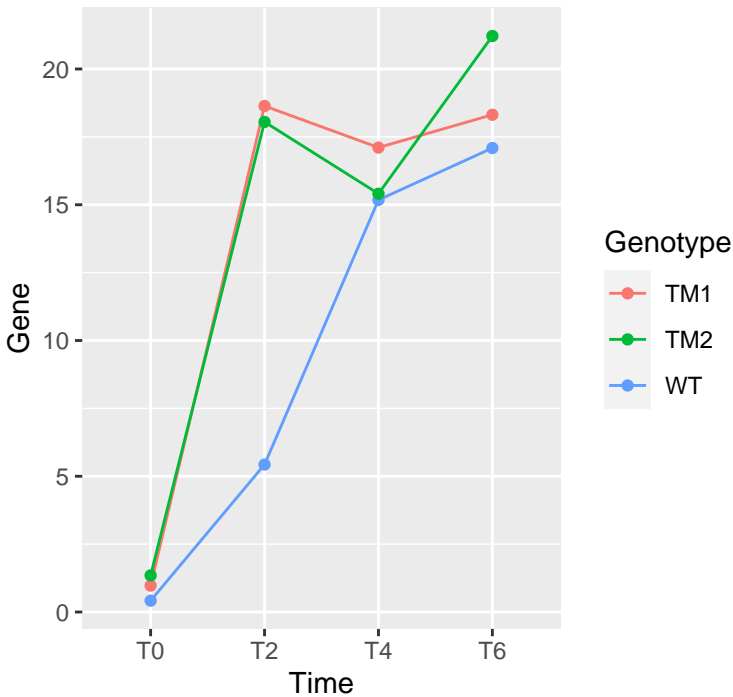

# AT2G15280

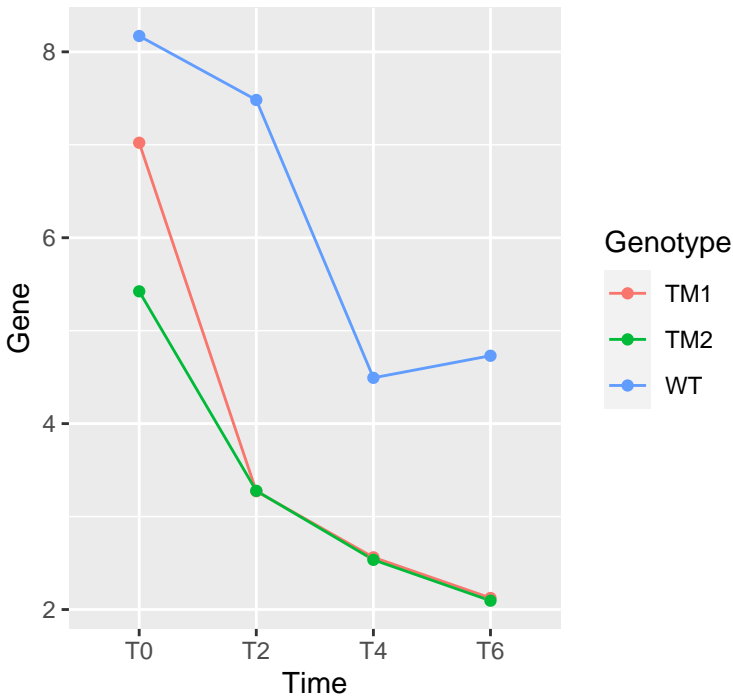



# AT2G18196

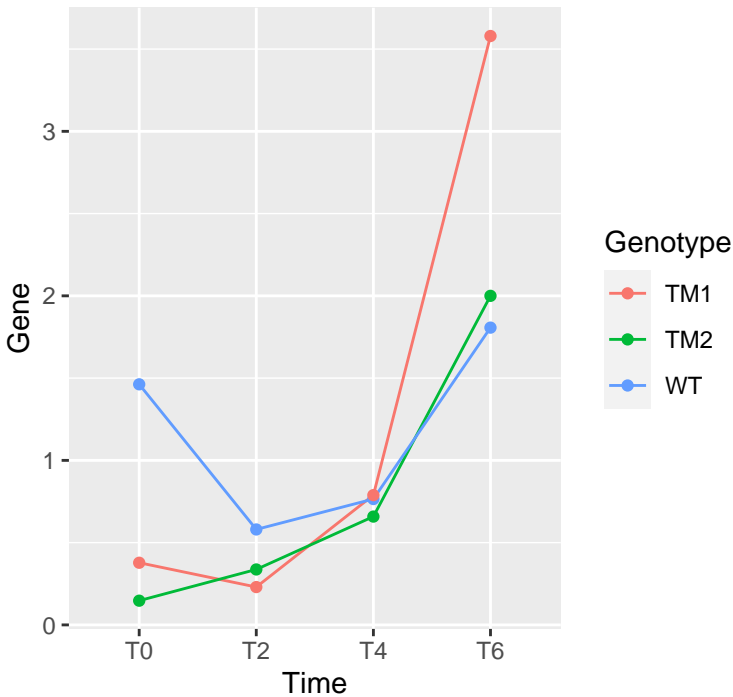

# AT2G20980

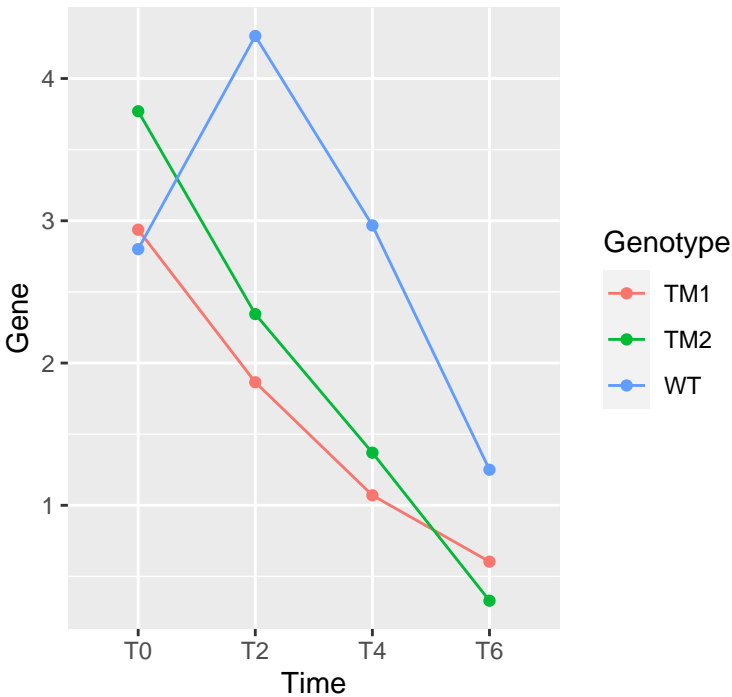

# AT2G21185

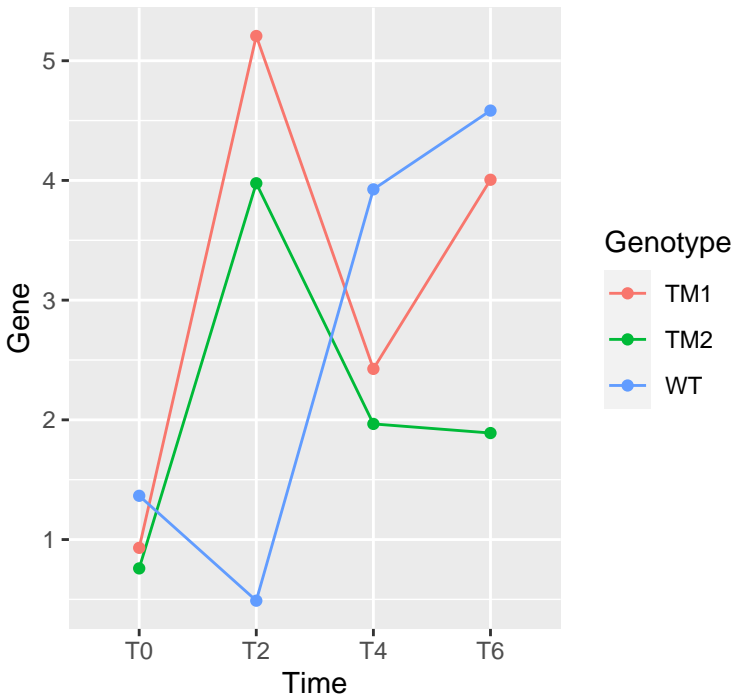

# AT2G21650

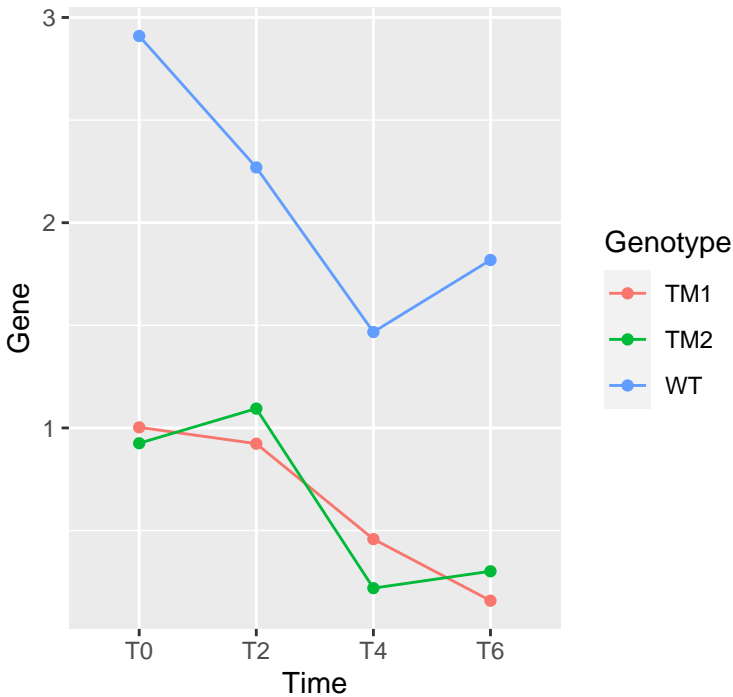

# AT2G22170

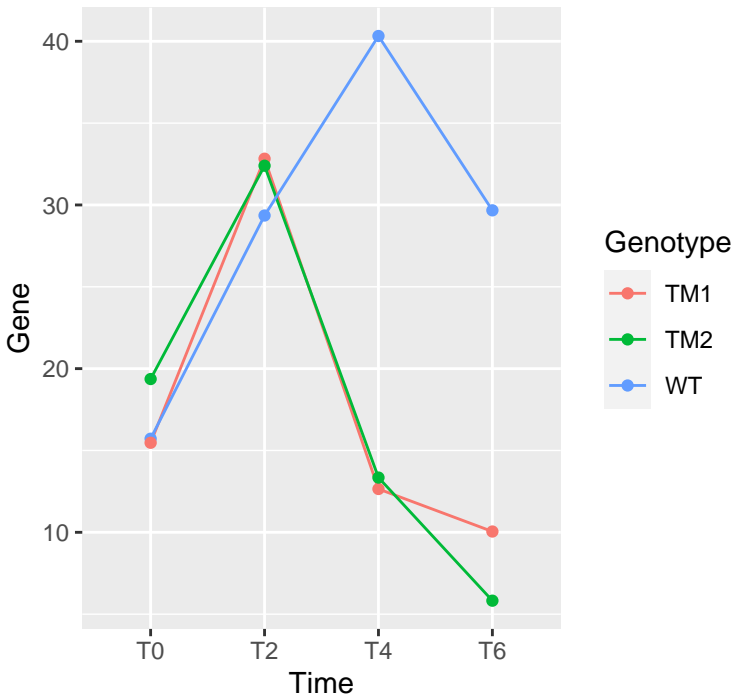

# AT2G23670

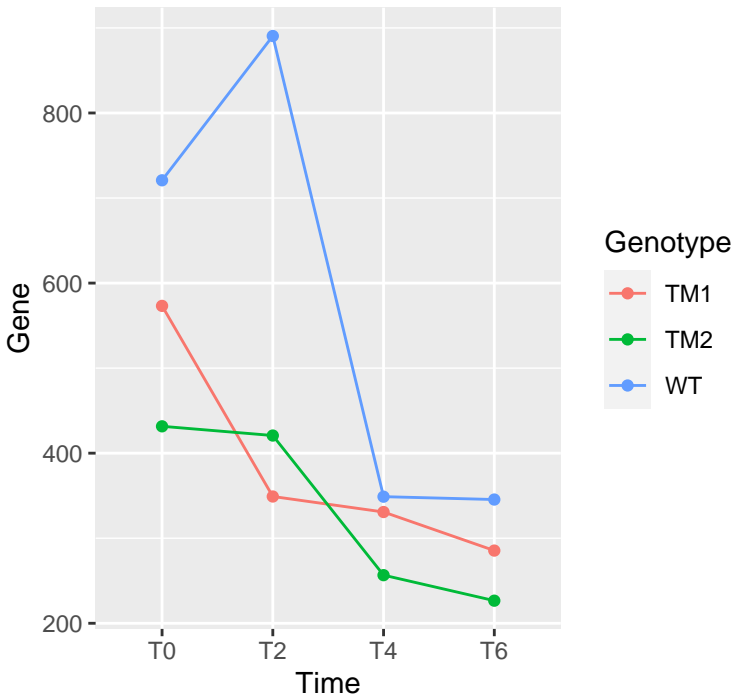

# AT2G24240

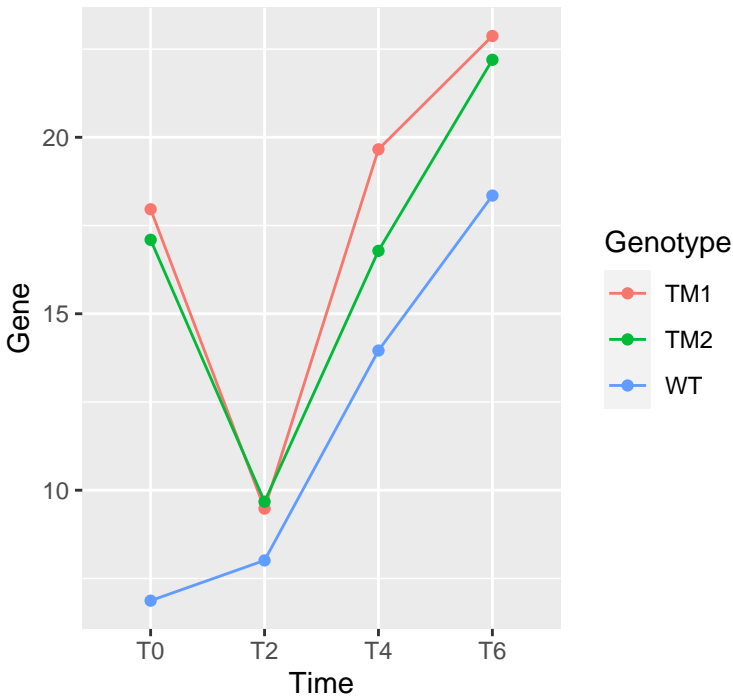

# AT2G25200

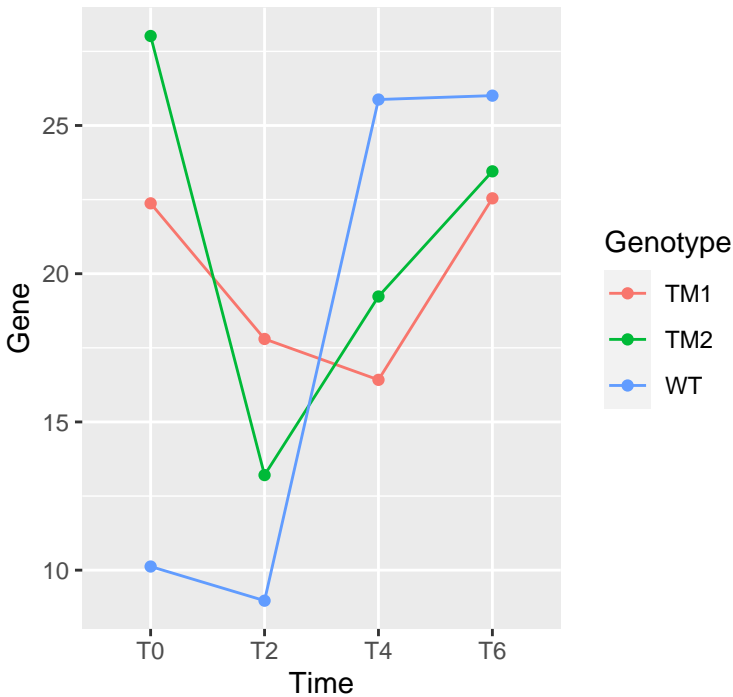



# AT2G26870

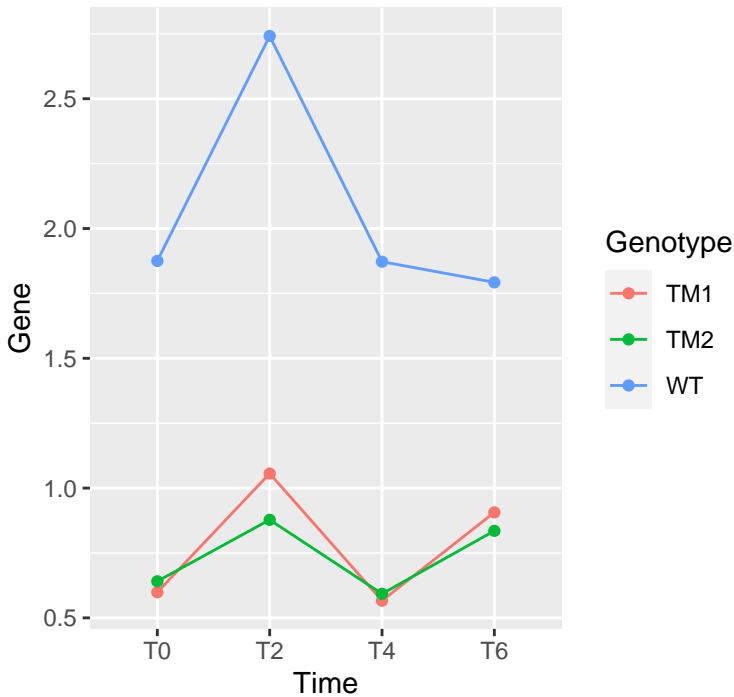

# AT2G27402

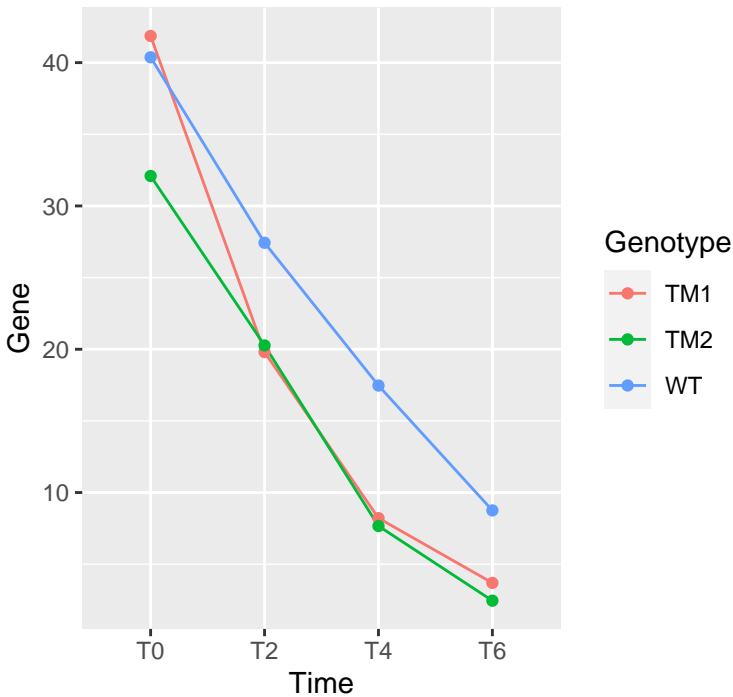

# AT2G27580

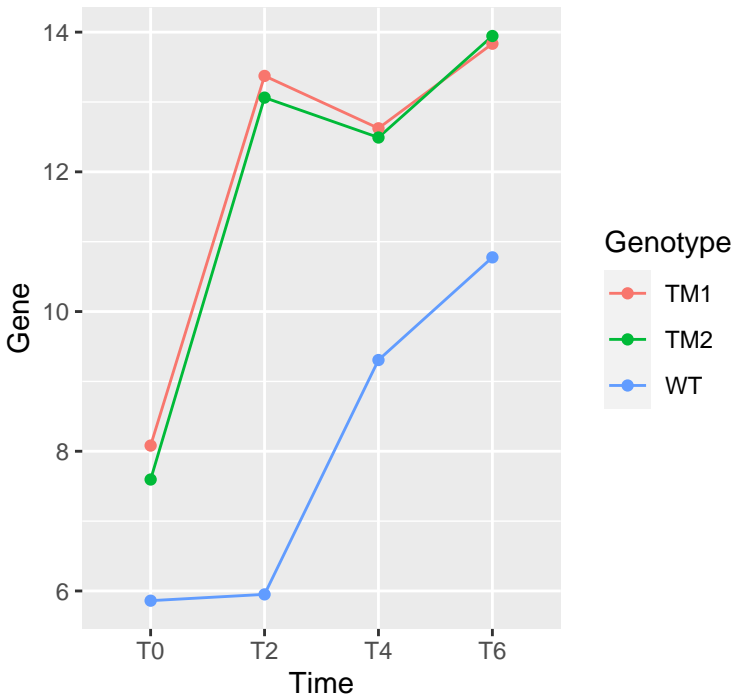

# AT2G28400

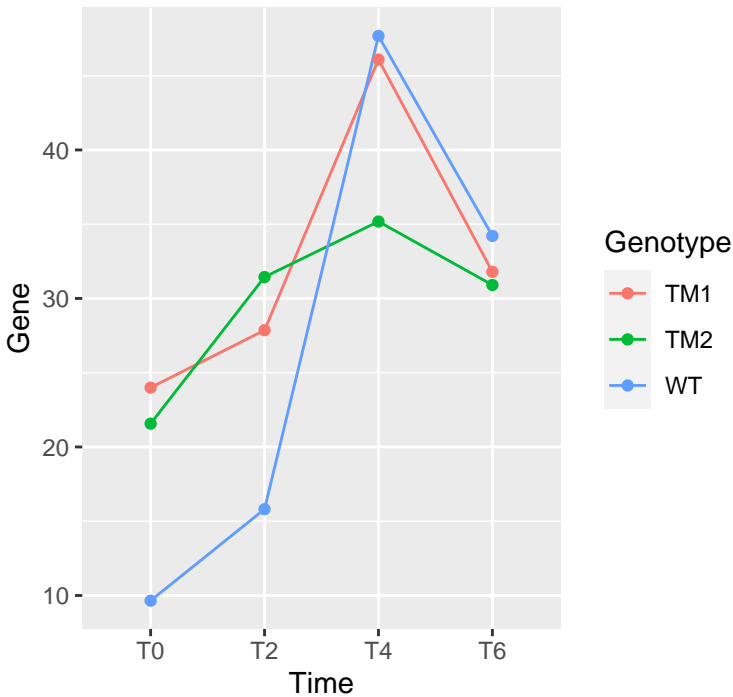

# AT2G29350

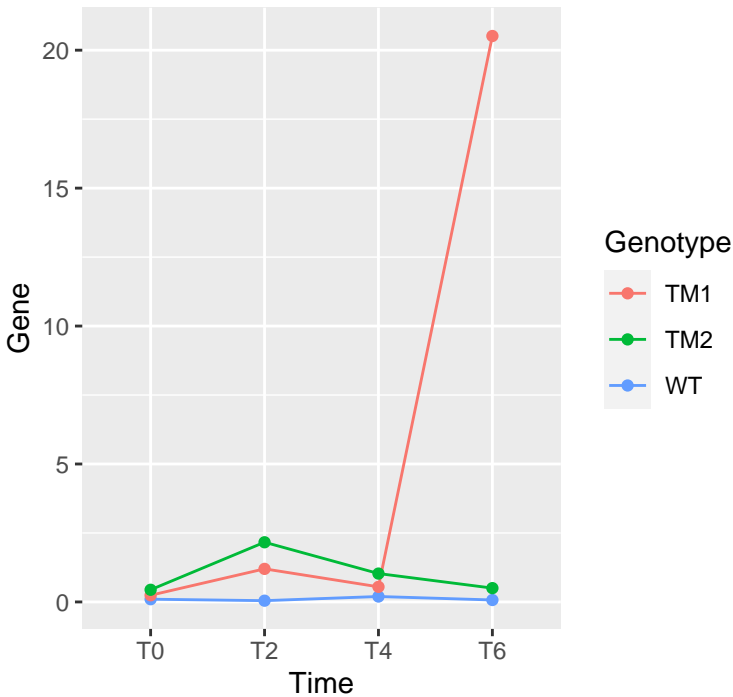

# AT2G29420

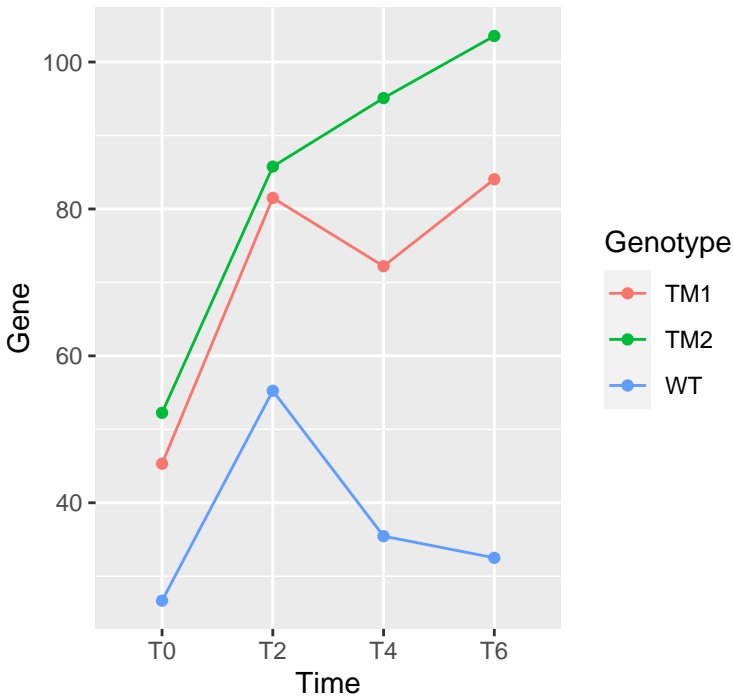

# AT2G30880

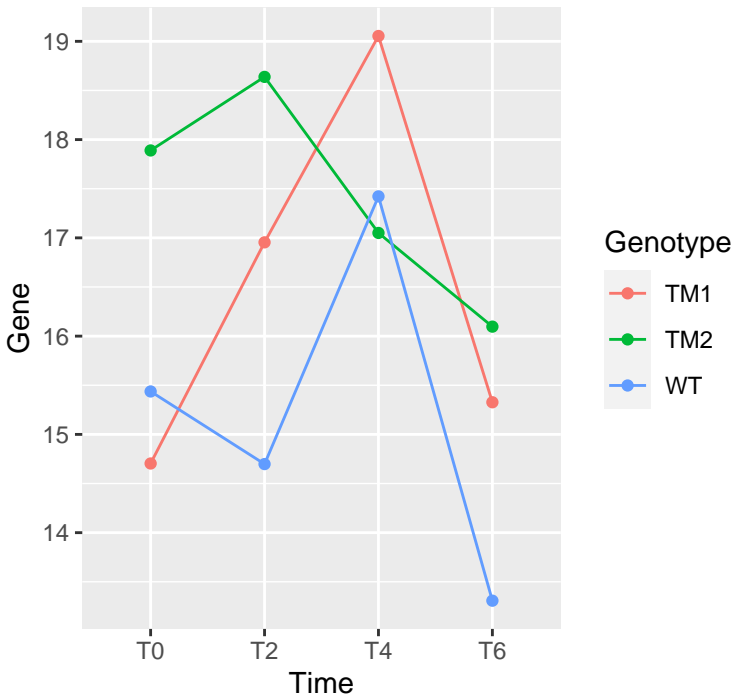

# AT2G32870

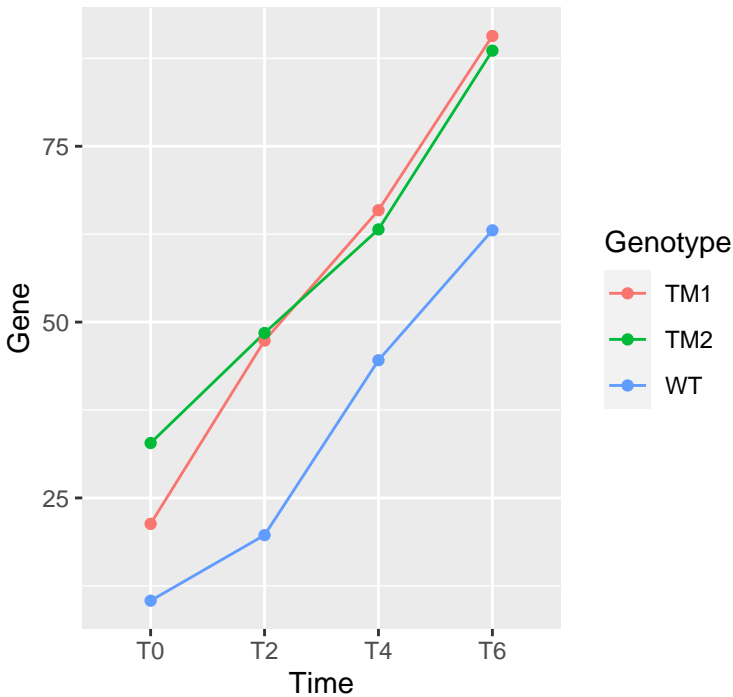



# AT2G34300

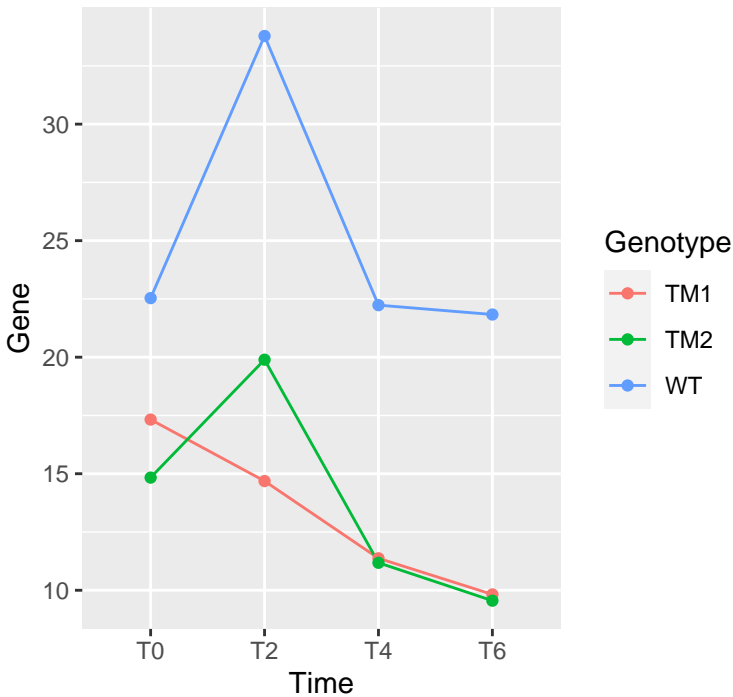

# AT2G34510

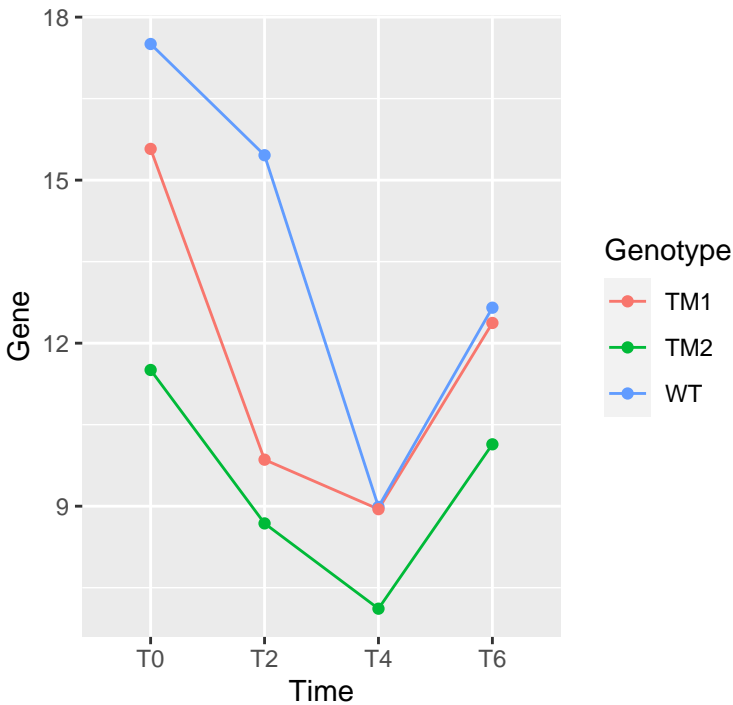

# AT2G35190

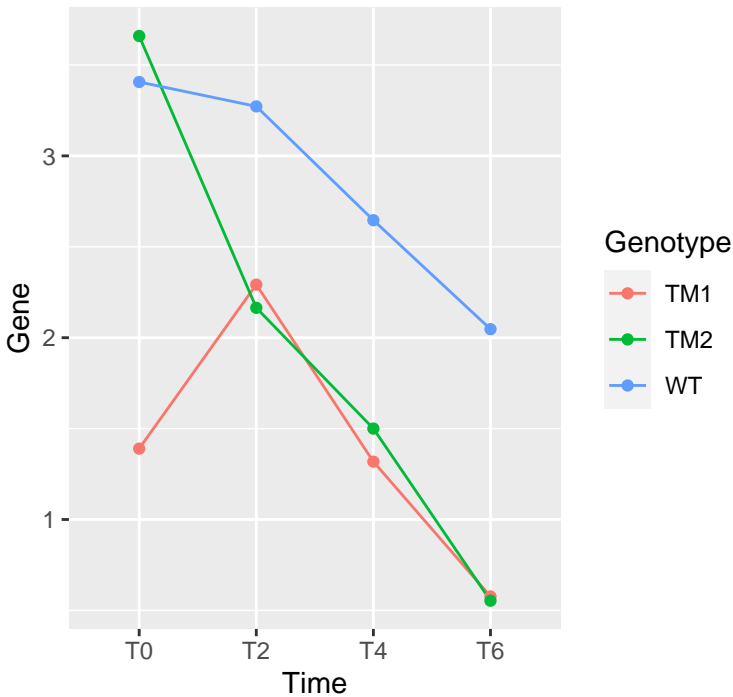

# AT2G36830

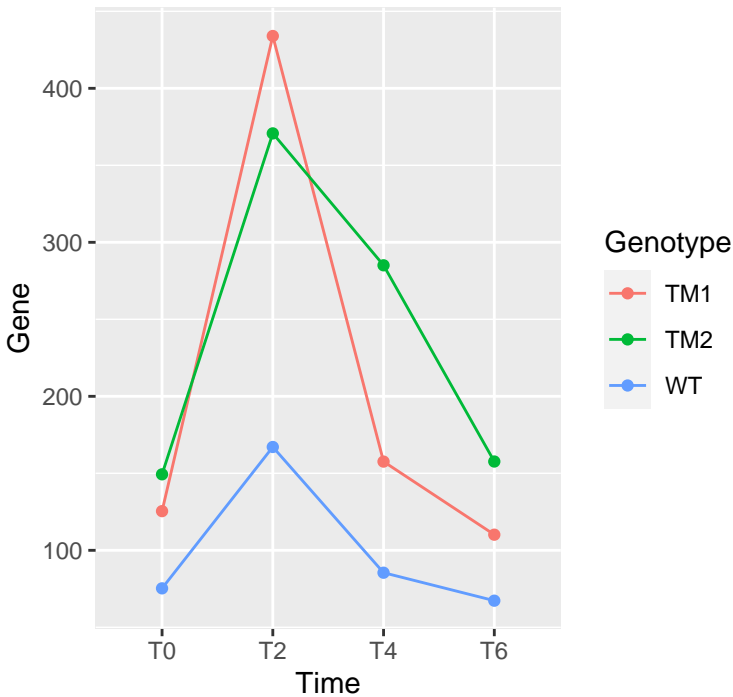

# AT2G37130

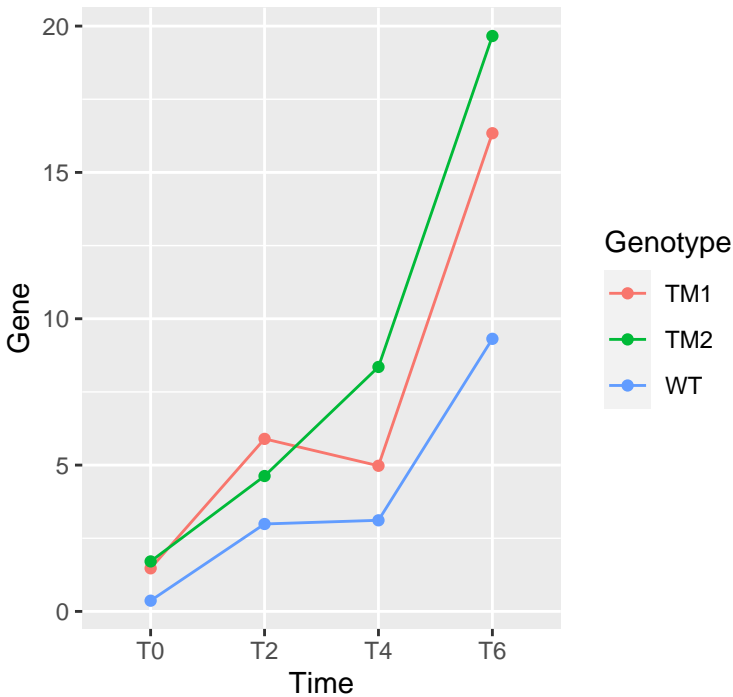

# AT2G37760

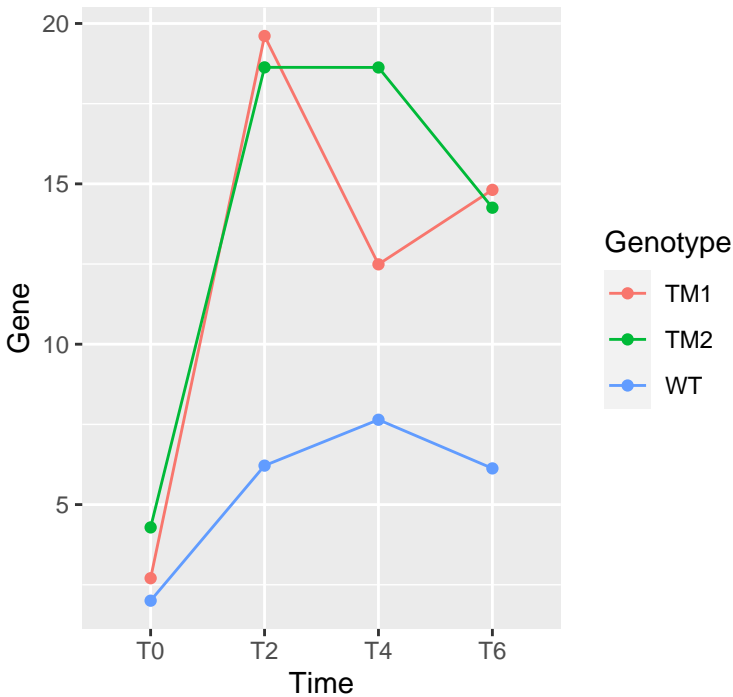

# AT2G37770

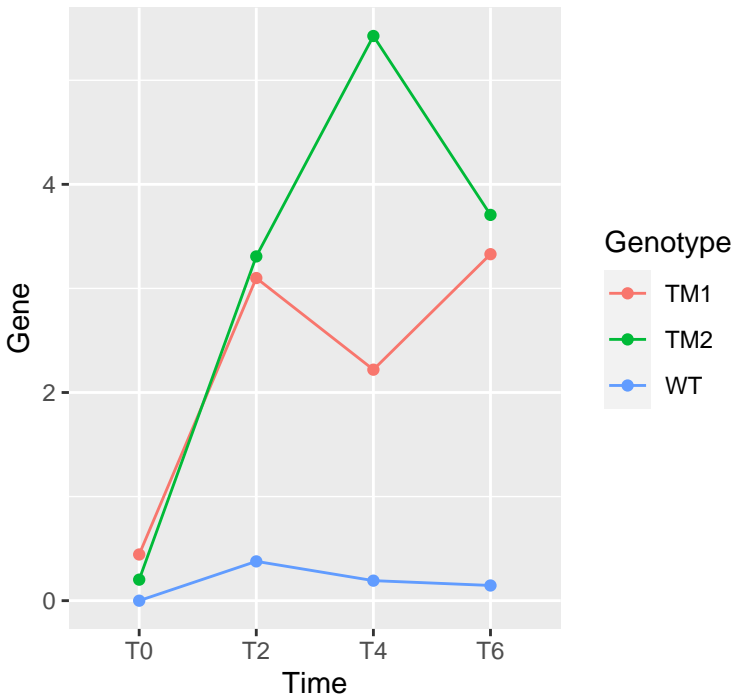

# AT2G37980

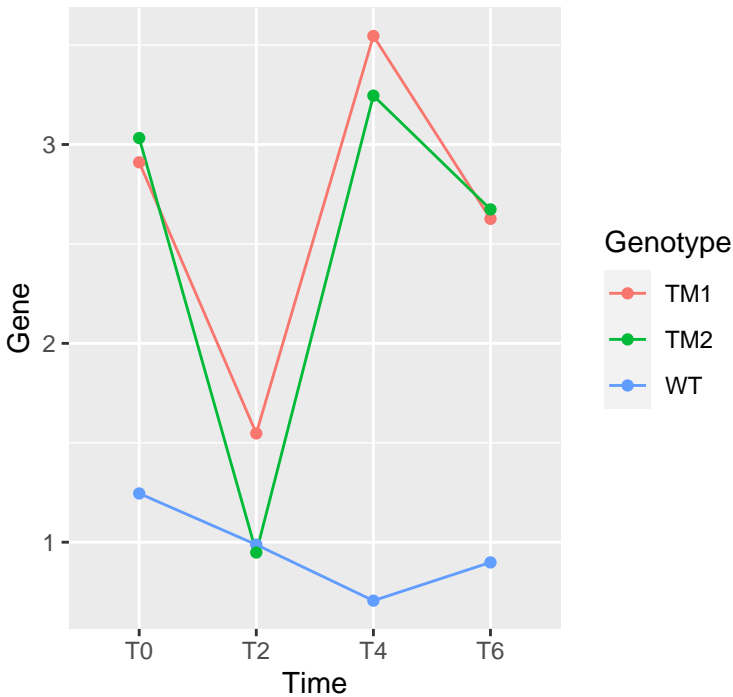



# AT2G38640

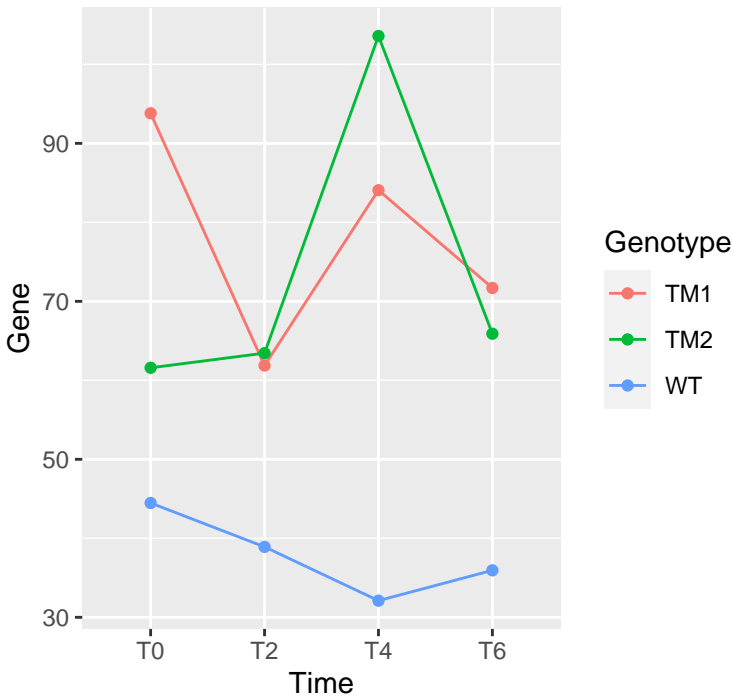

# AT2G38720

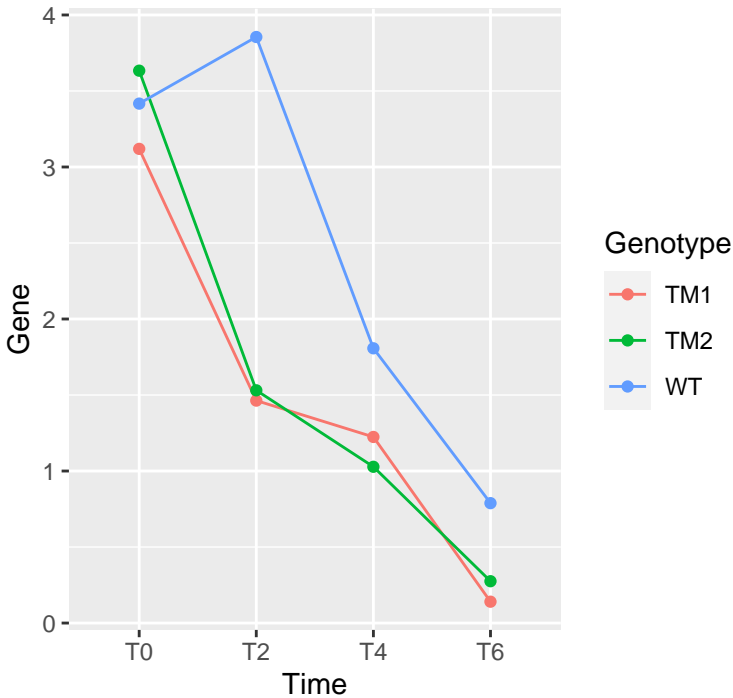

# AT2G39360

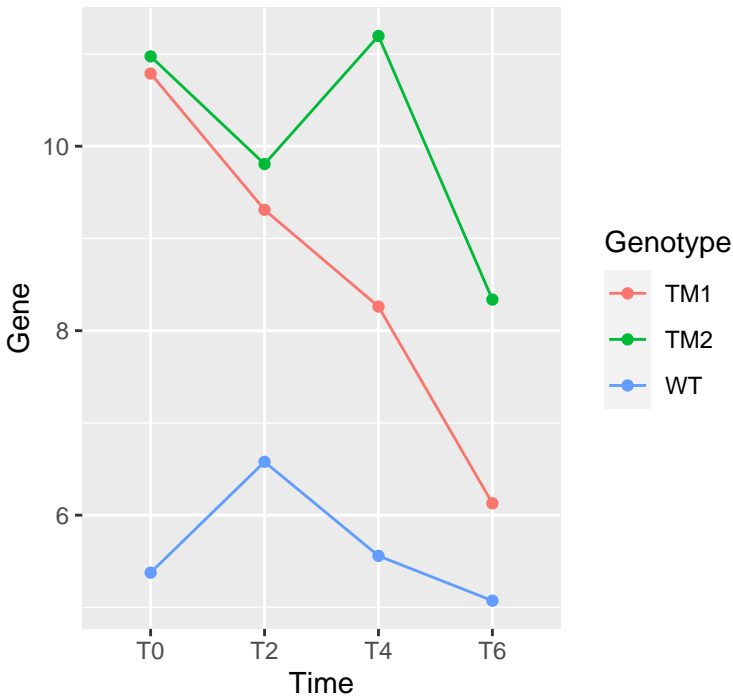

# AT2G40475

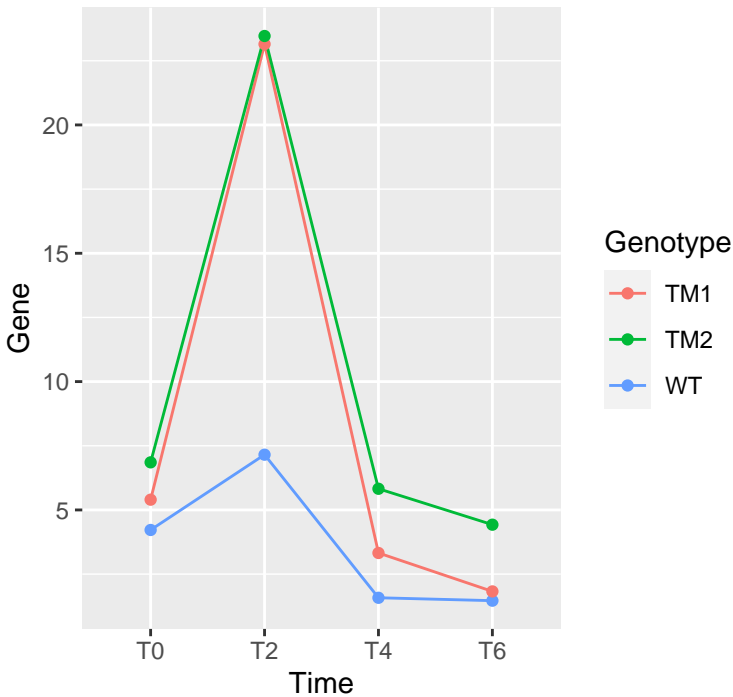

# AT2G40610

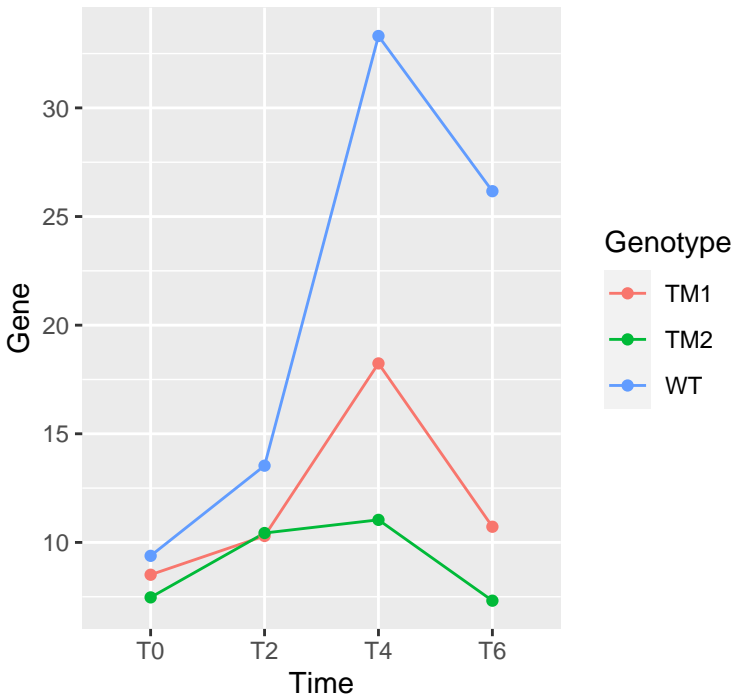

# AT2G40960

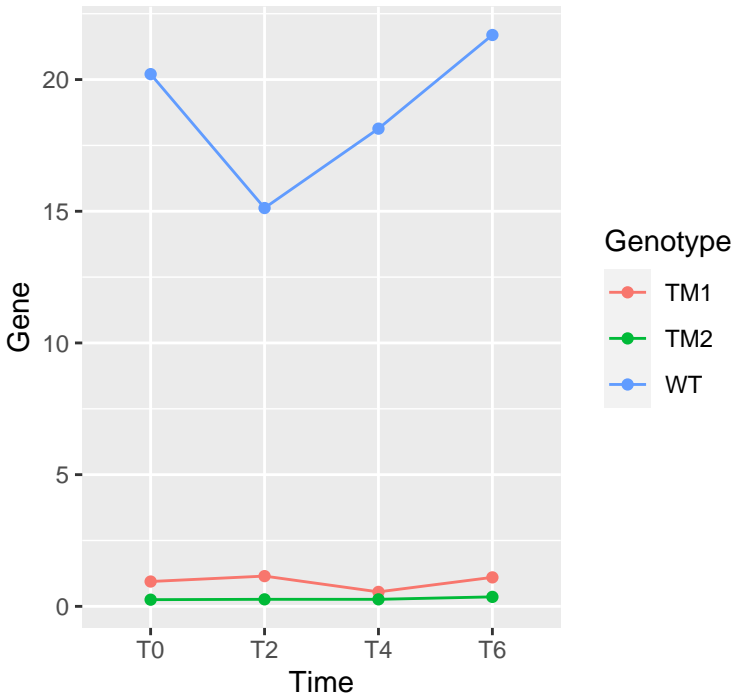

# AT2G41170

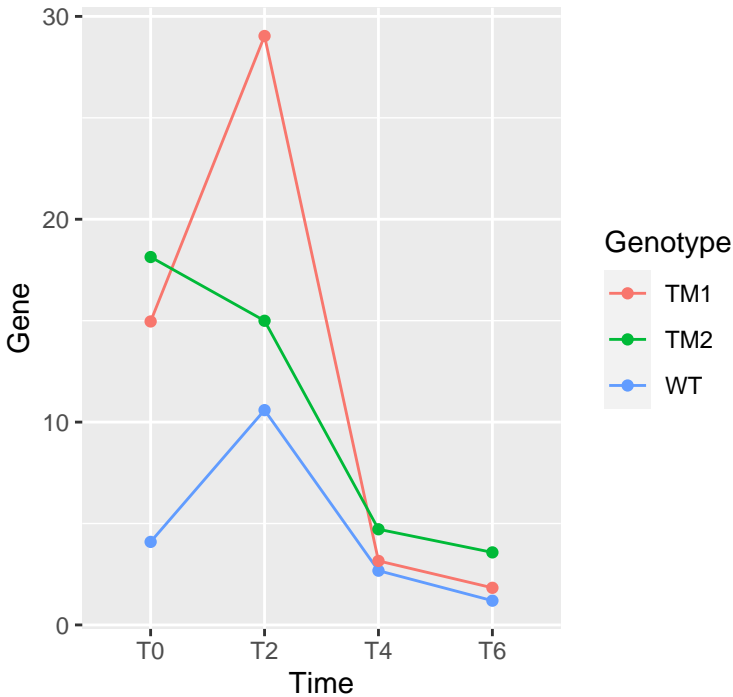

# AT2G41380

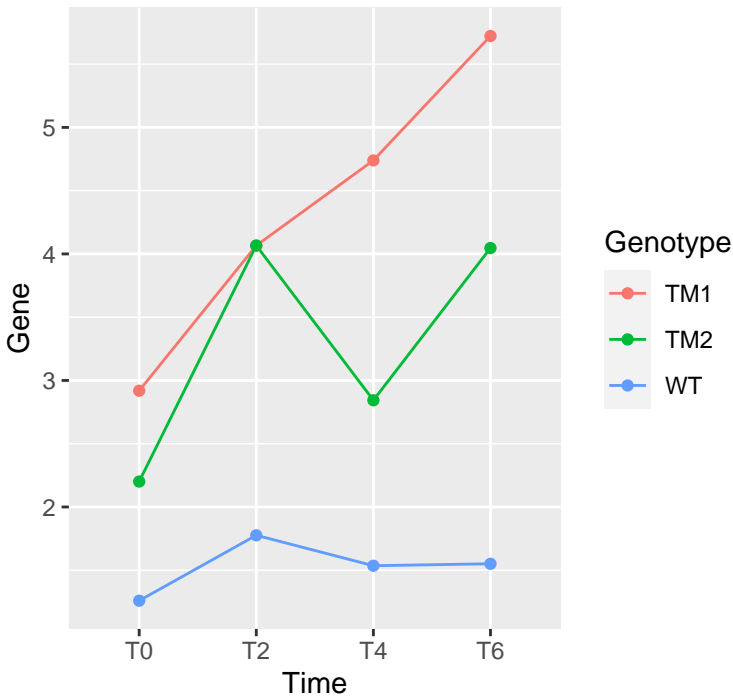



# AT2G42380

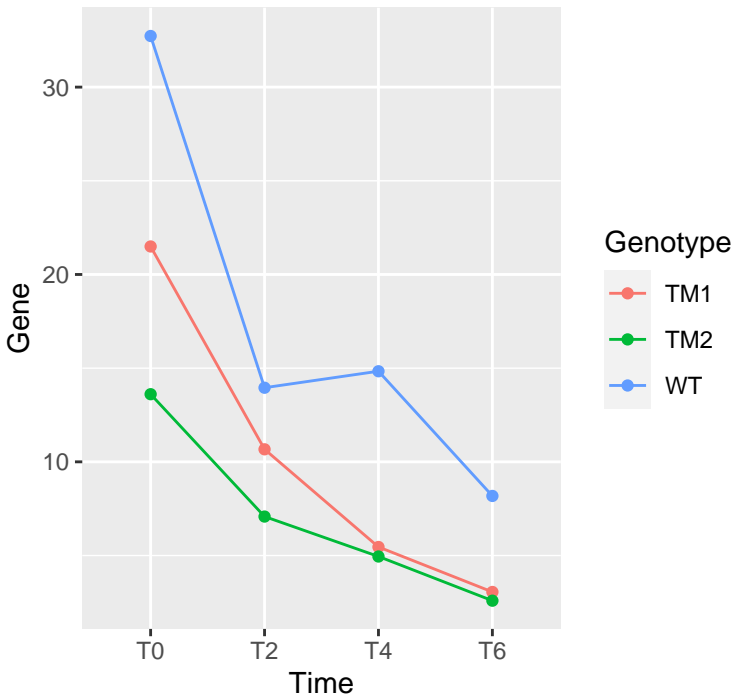

# AT2G42540

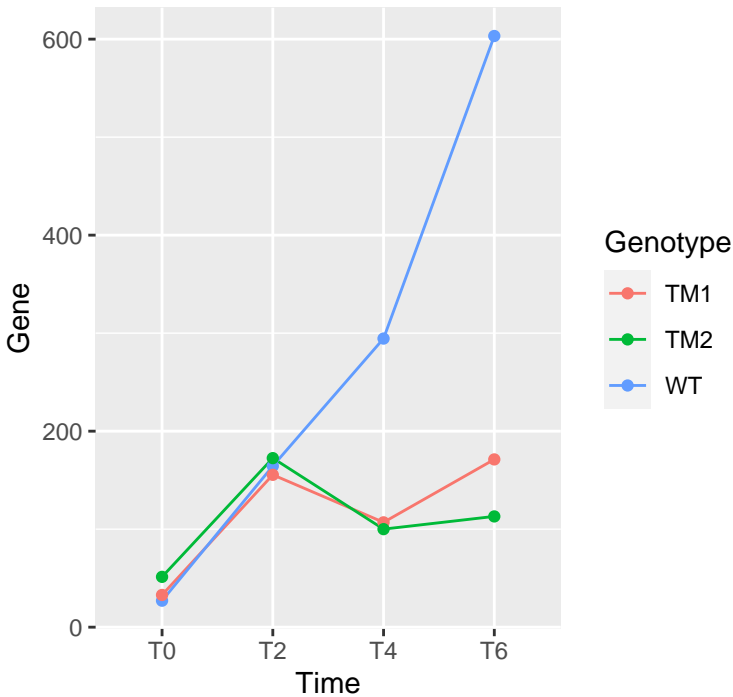

# AT2G42870

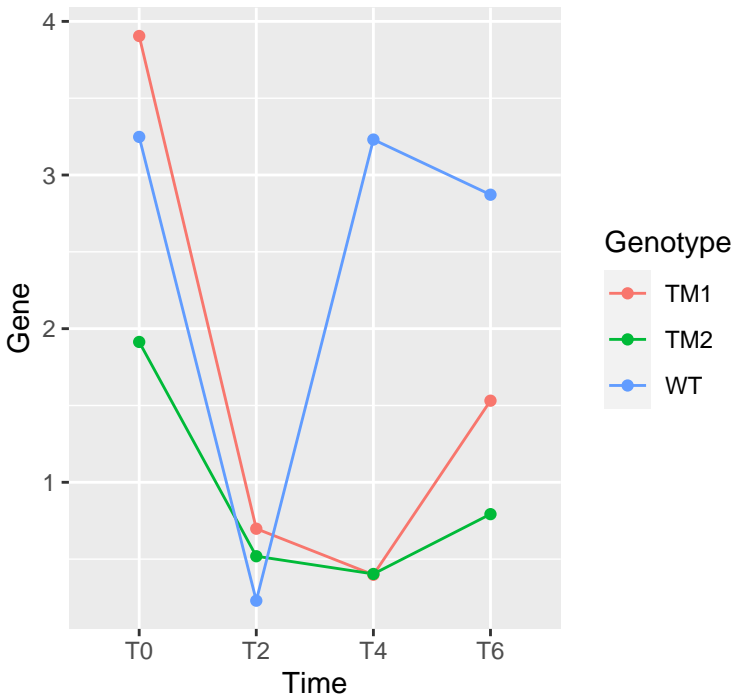

# AT2G43410

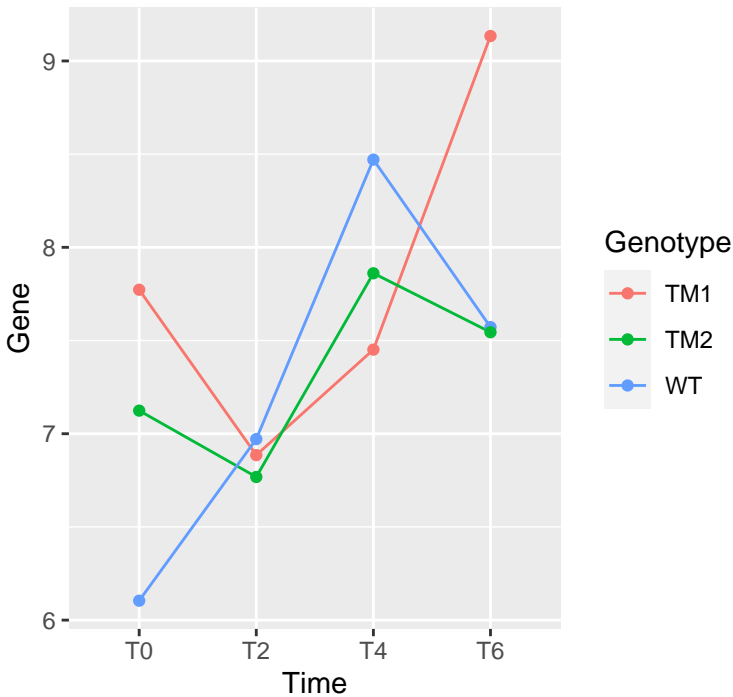

# AT2G43570

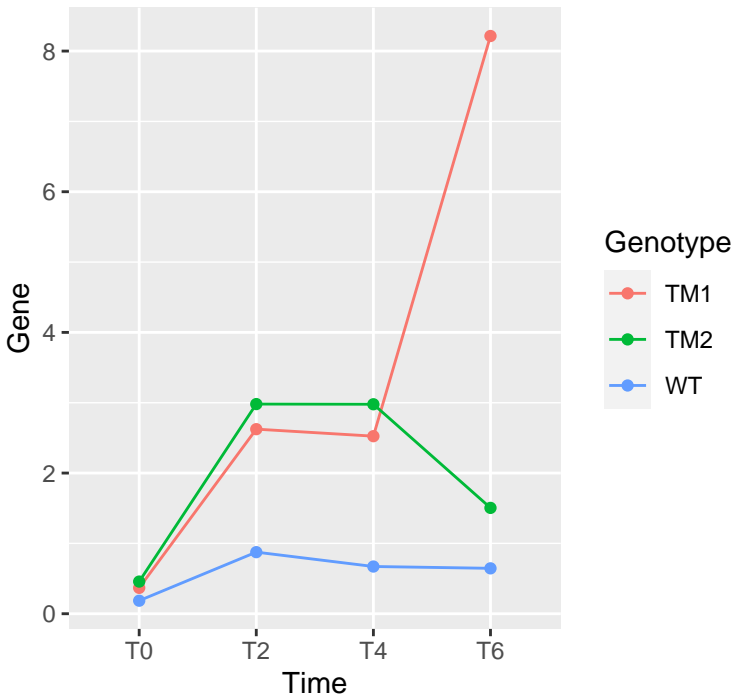

# AT2G44370

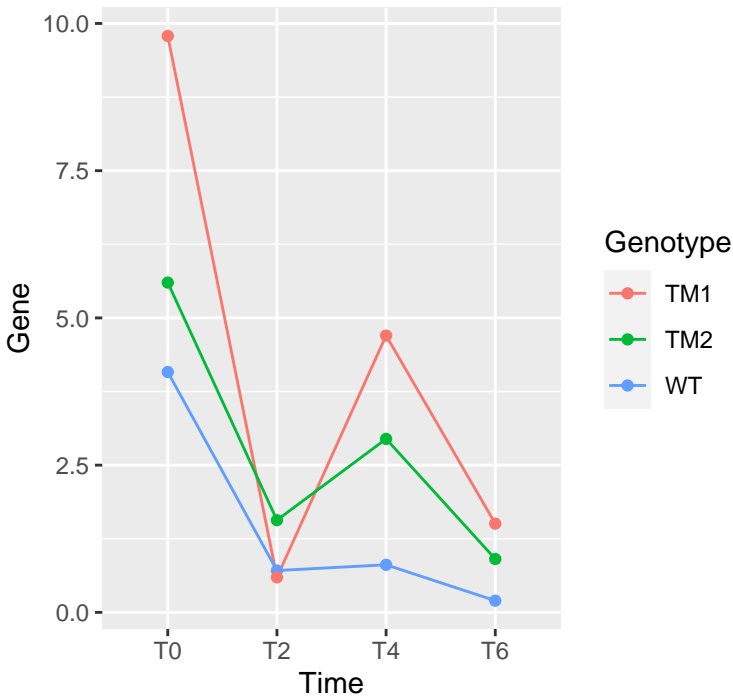

# AT2G45470

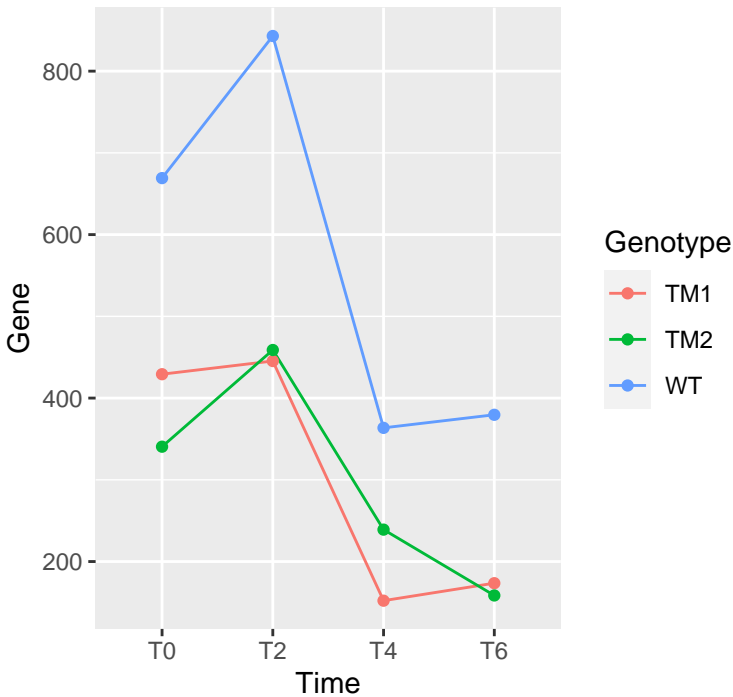

# AT2G45660

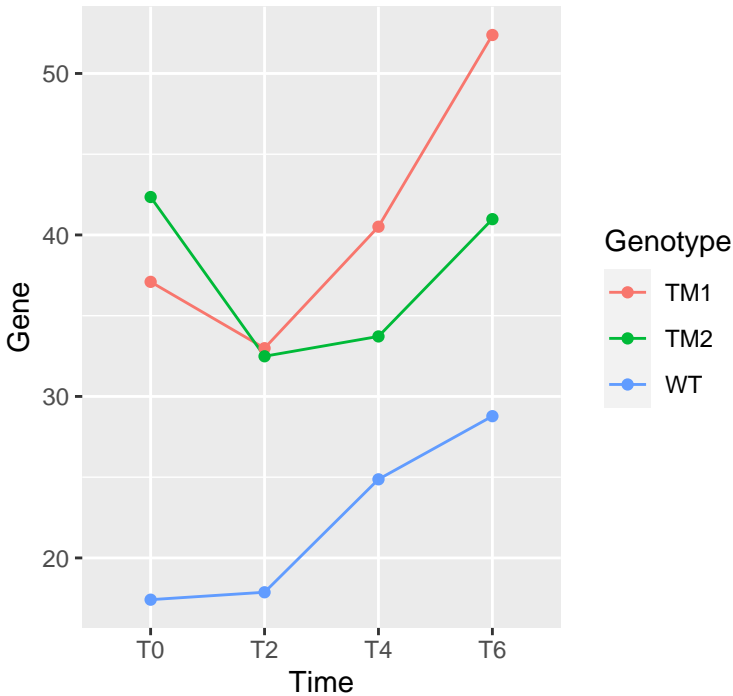



# AT2G46150

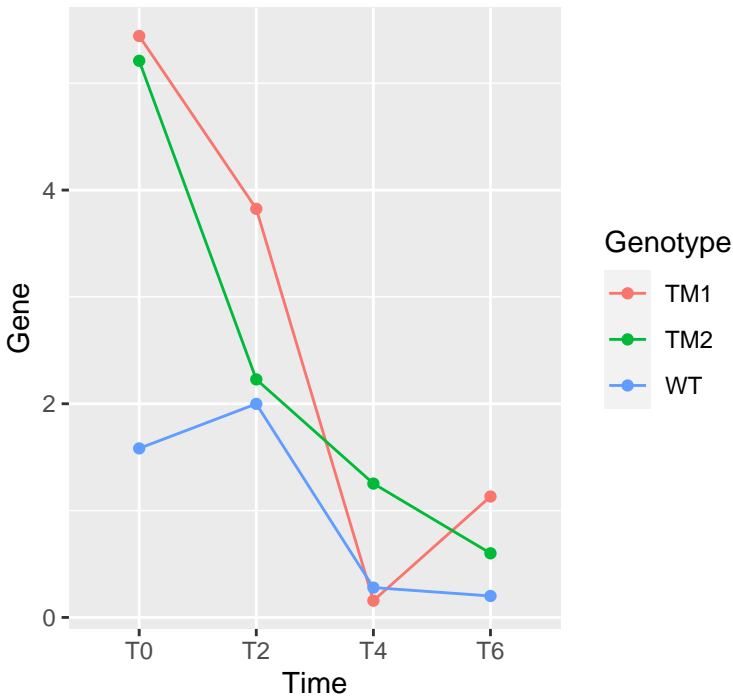

# AT2G46270

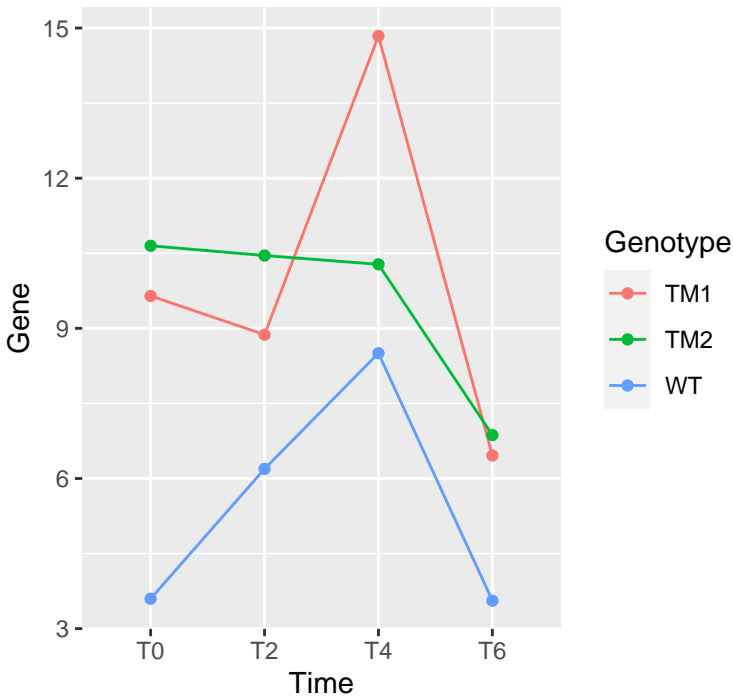

# AT2G46400

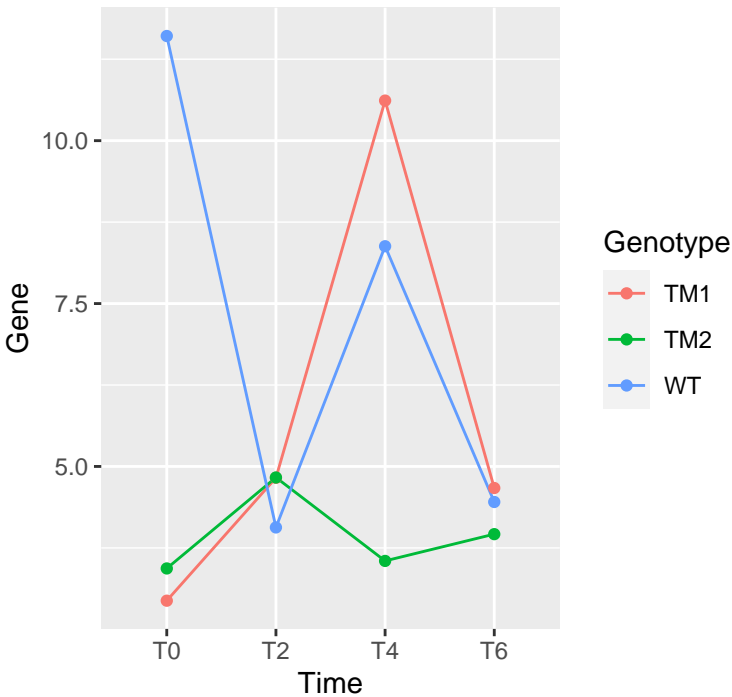

# AT2G47010

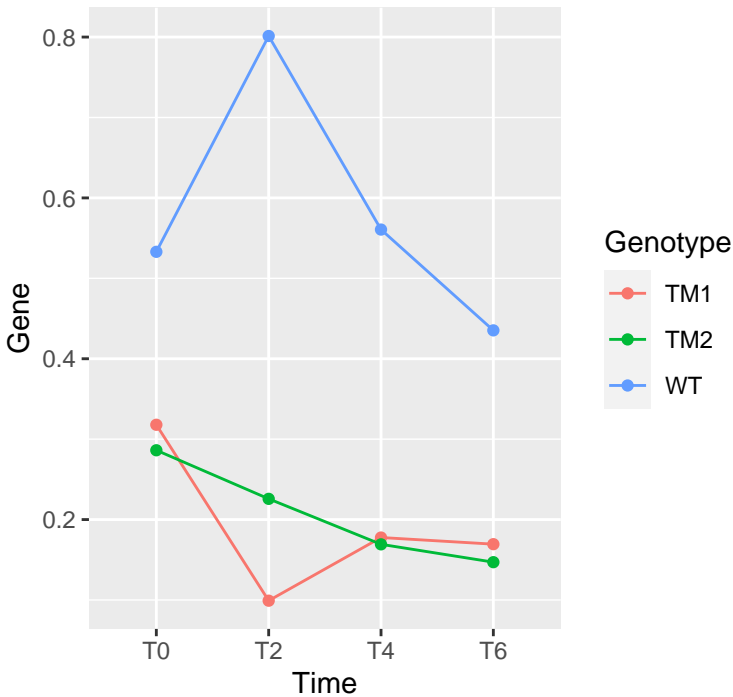

# AT2G47930

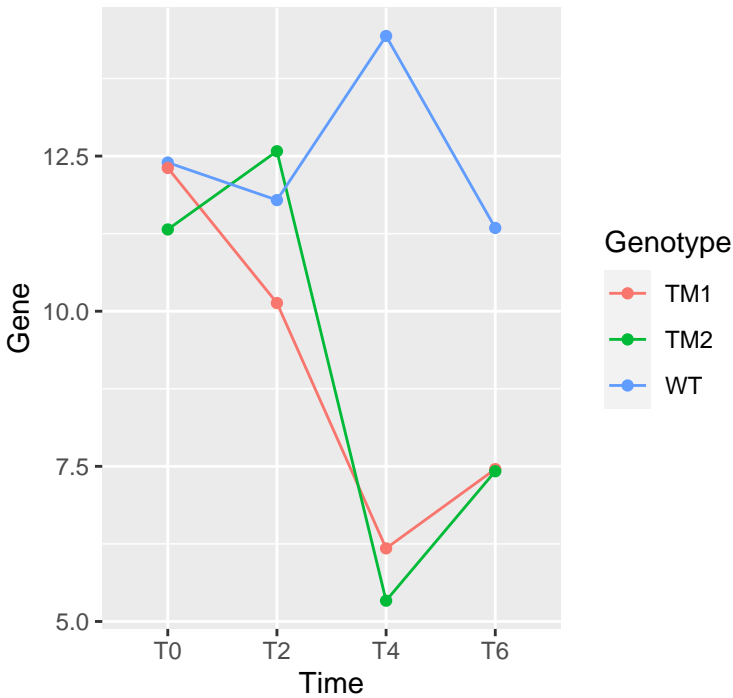

# AT3G01480

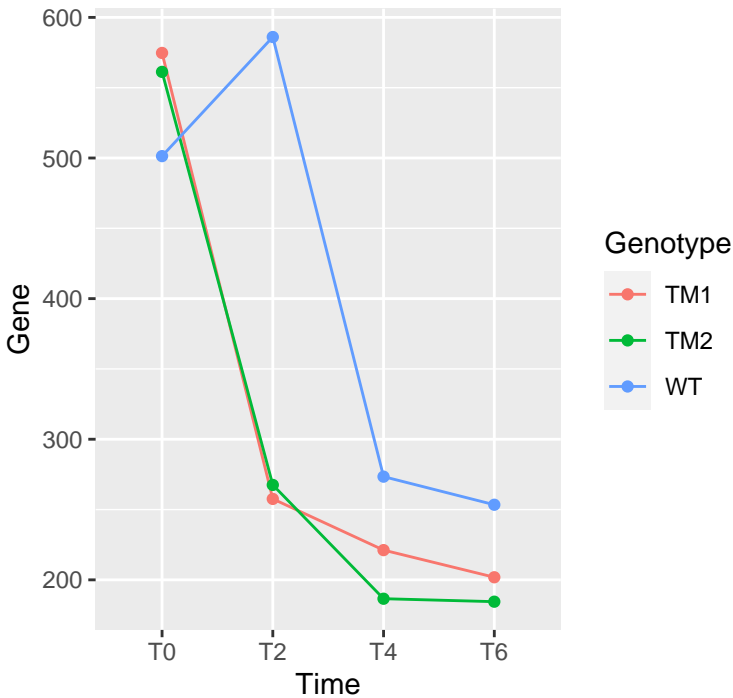

# AT3G01970

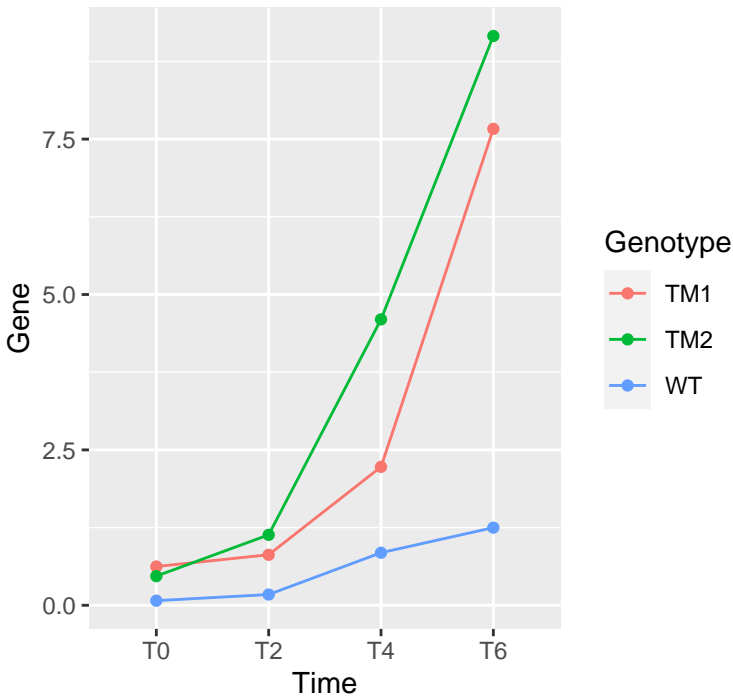

# AT3G02820

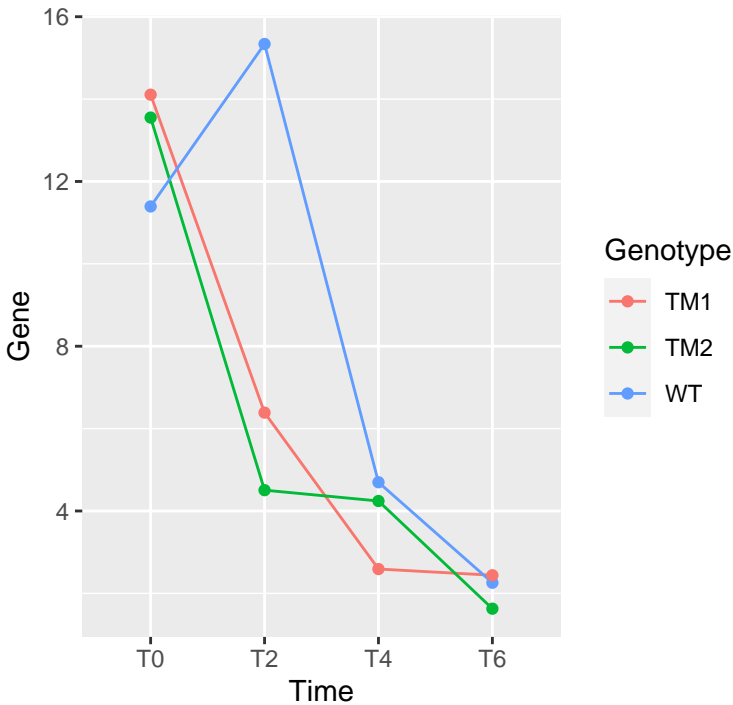



# AT3G03020

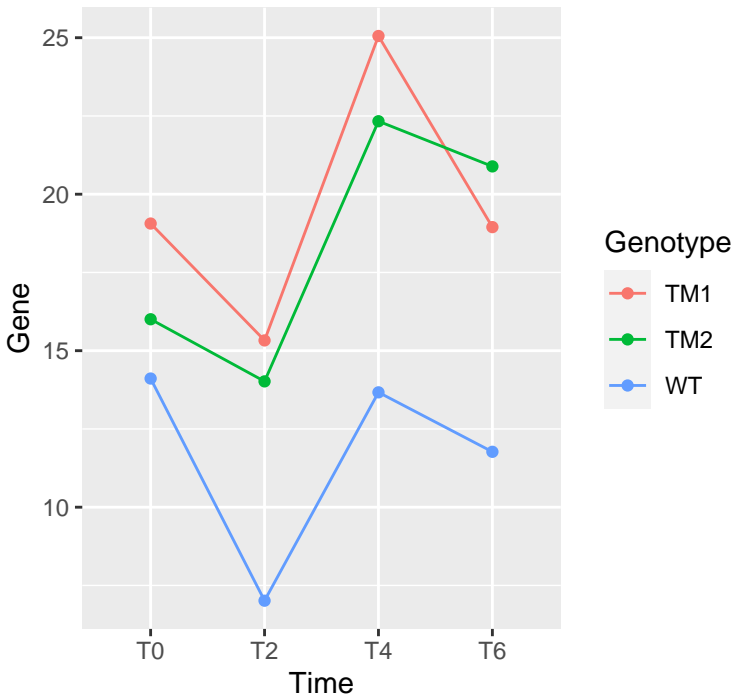

# AT3G03341

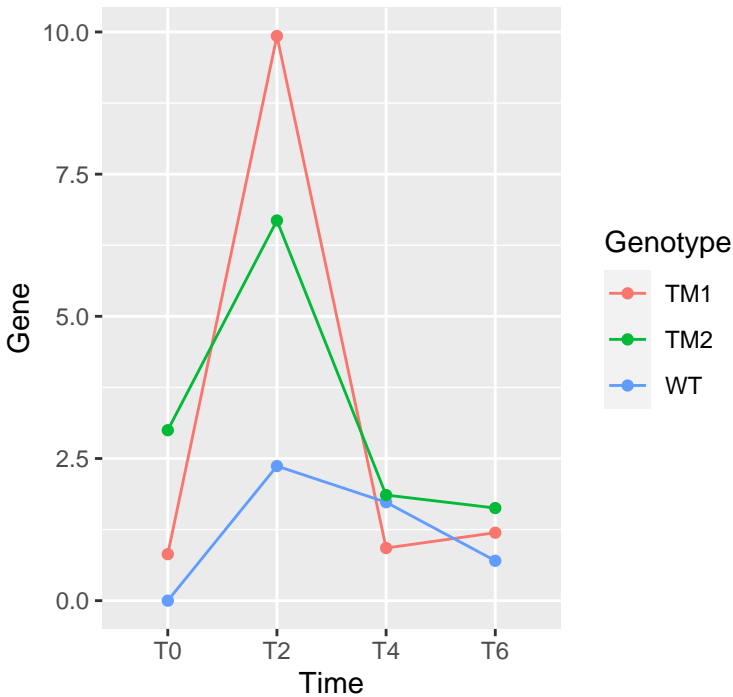

# AT3G03470

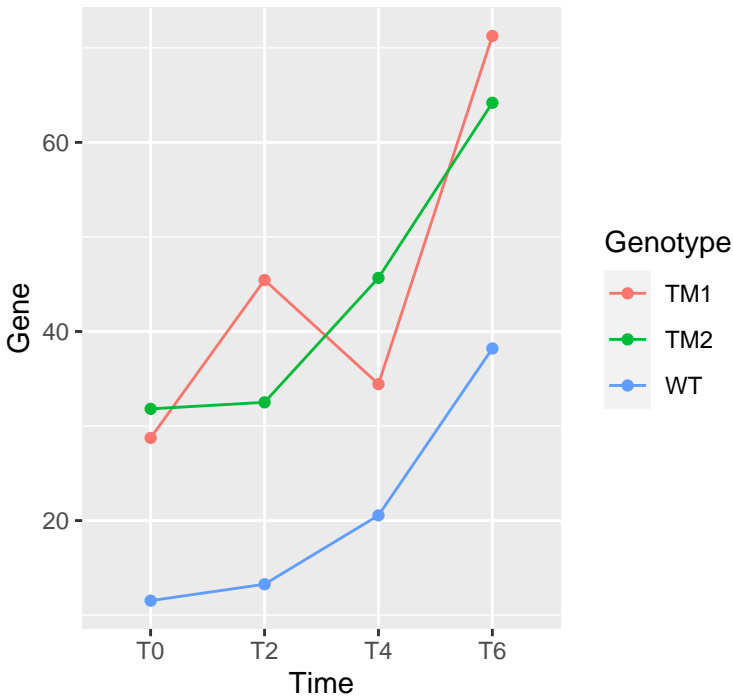

# AT3G04010

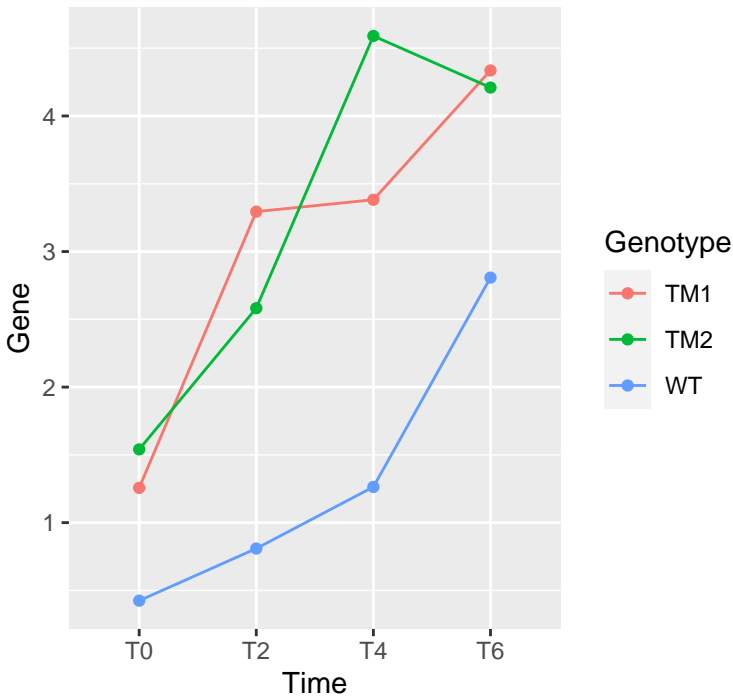

# AT3G04060

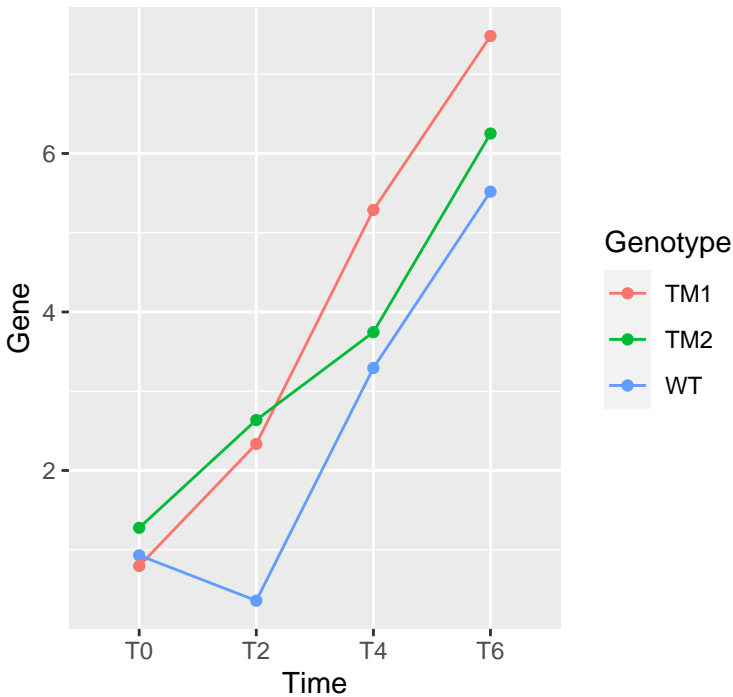

# AT3G04110

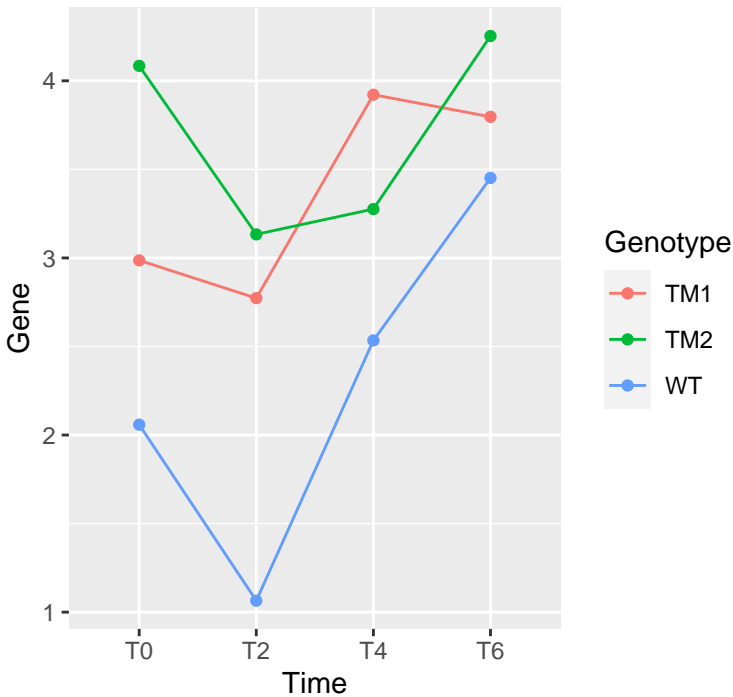

# AT3G05640

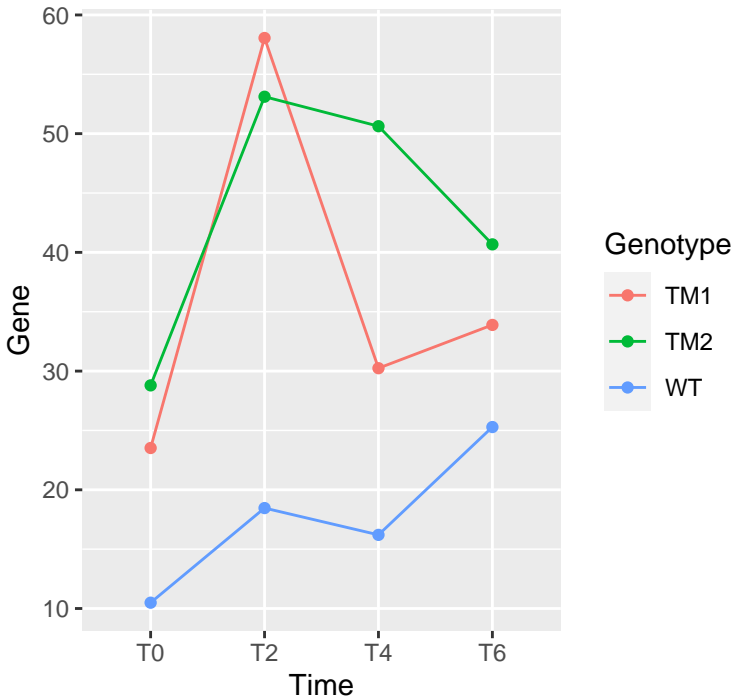

# AT3G05690

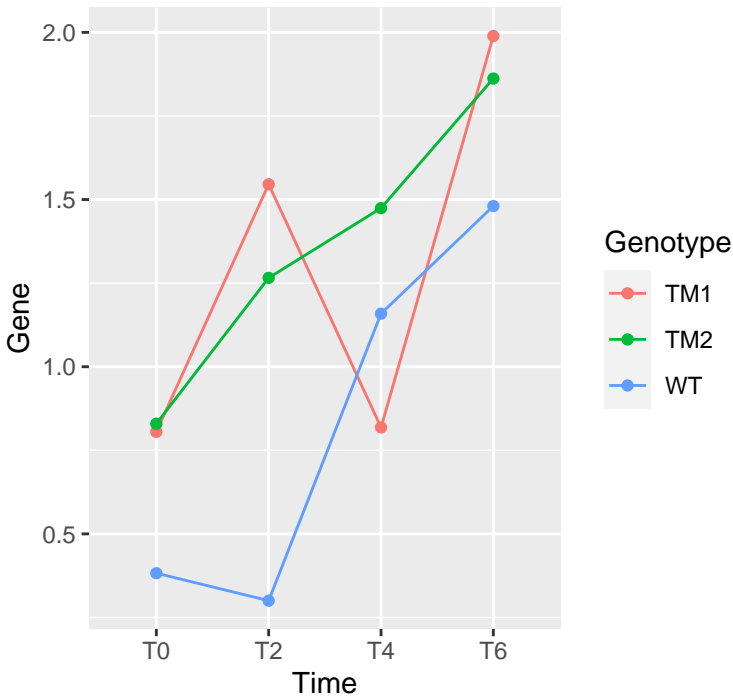



# AT3G06650

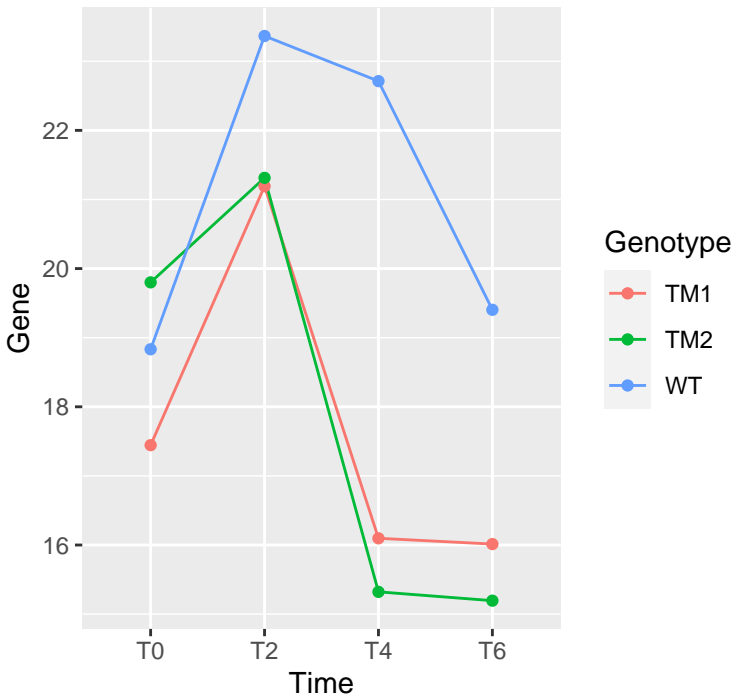

# AT3G06880

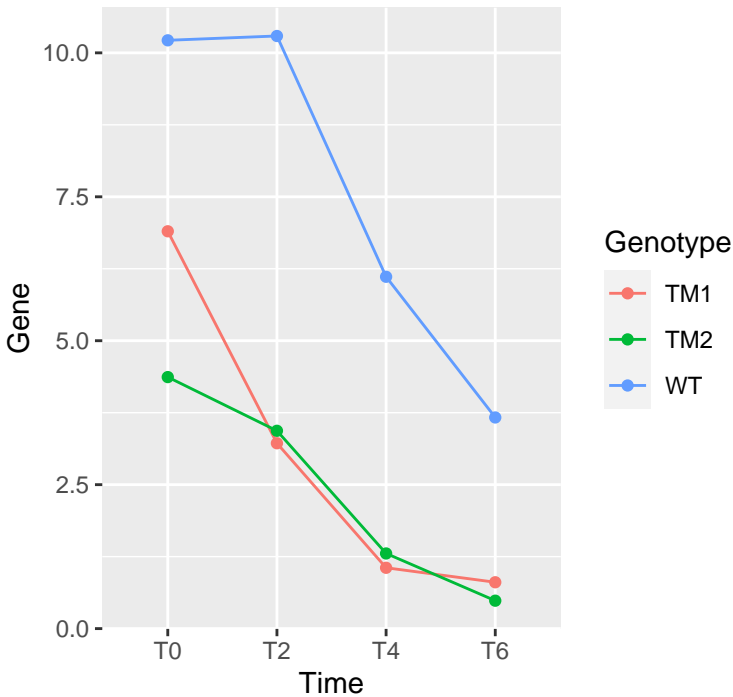

# AT3G07010

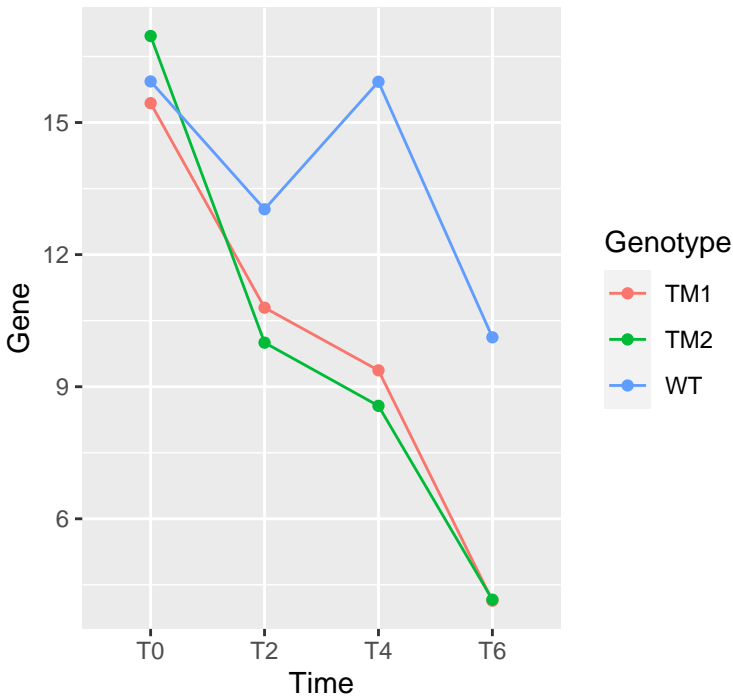

# AT3G10300

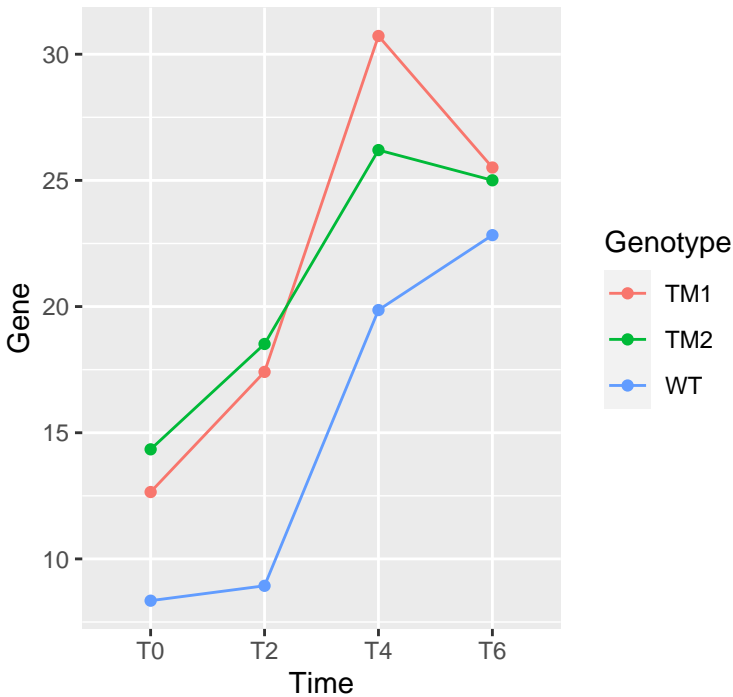

# AT3G10660

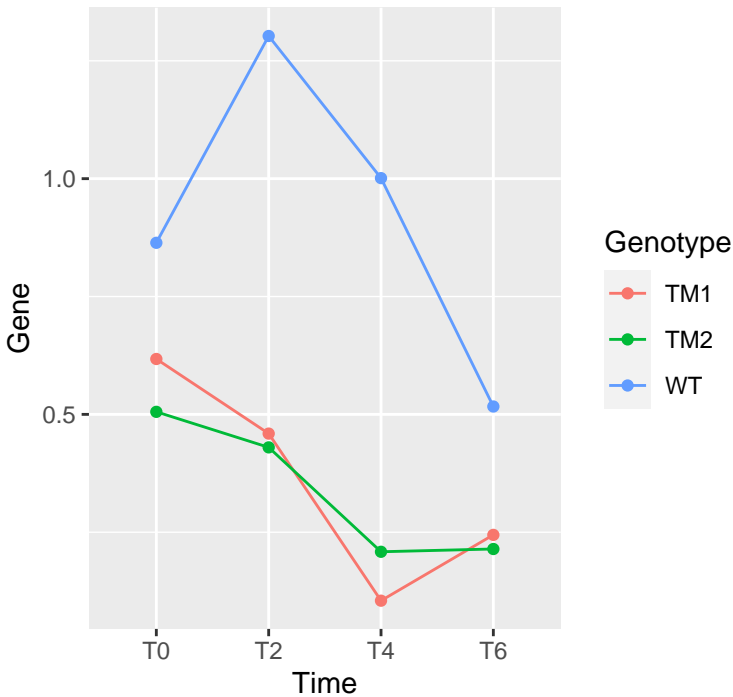

# AT3G10985

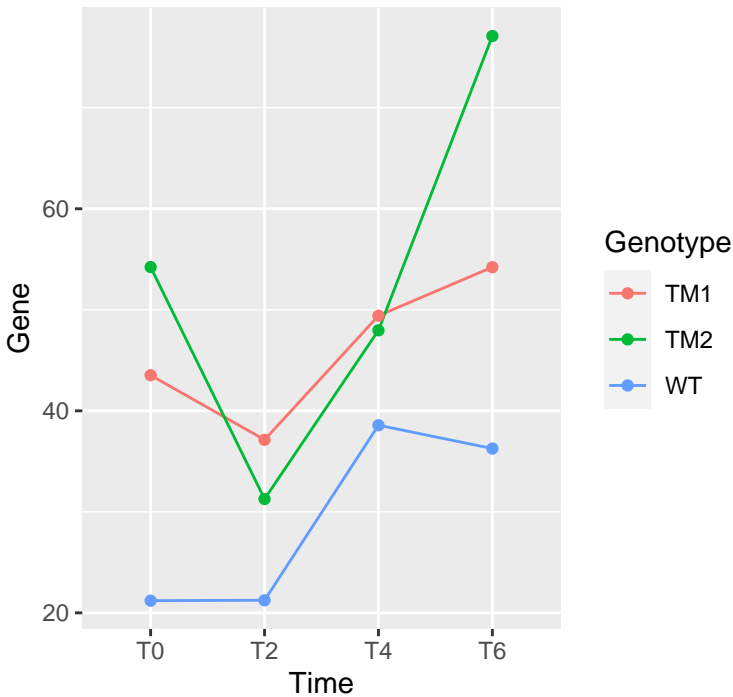

# AT3G11660

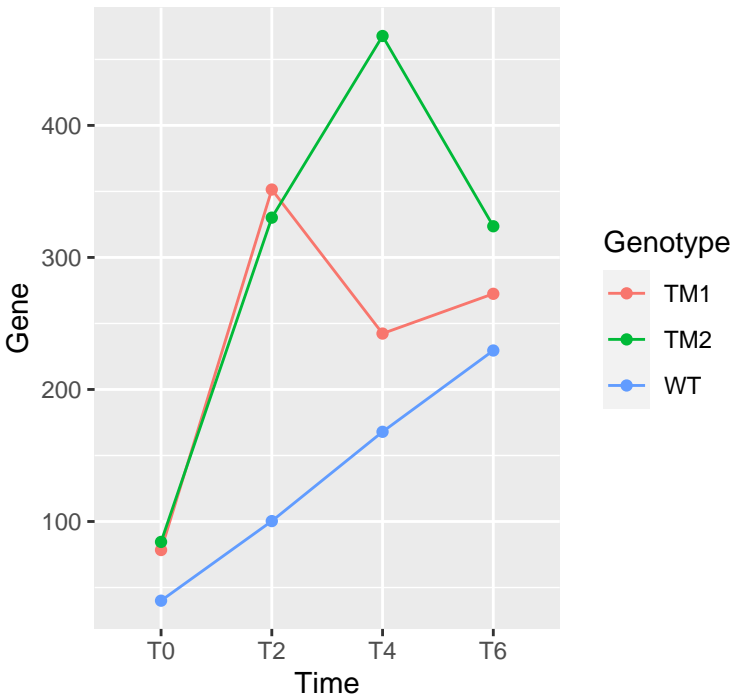

# AT3G12250

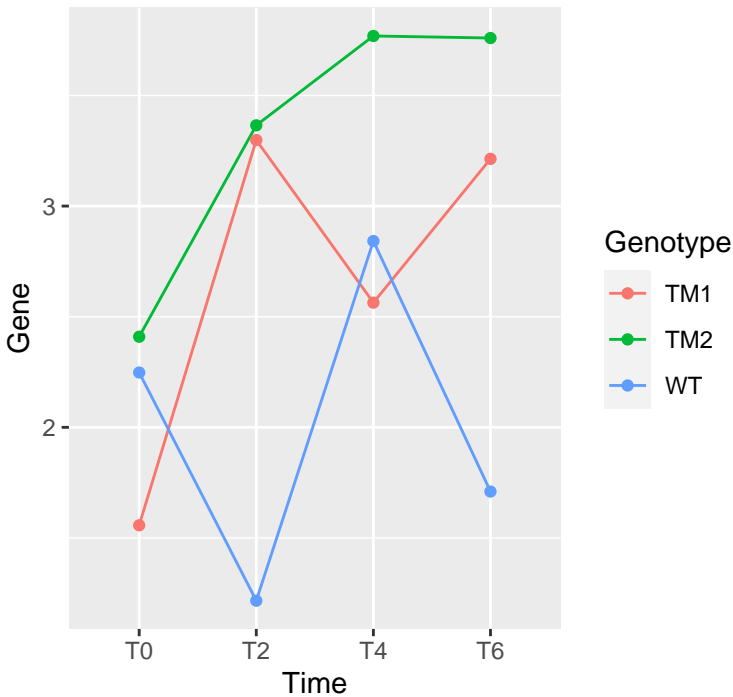



# AT3G12520

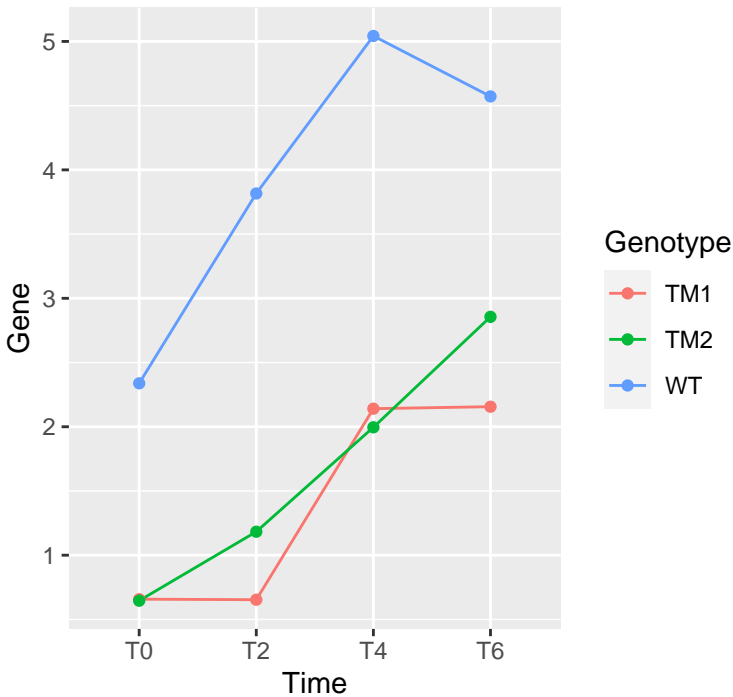

# AT3G12580

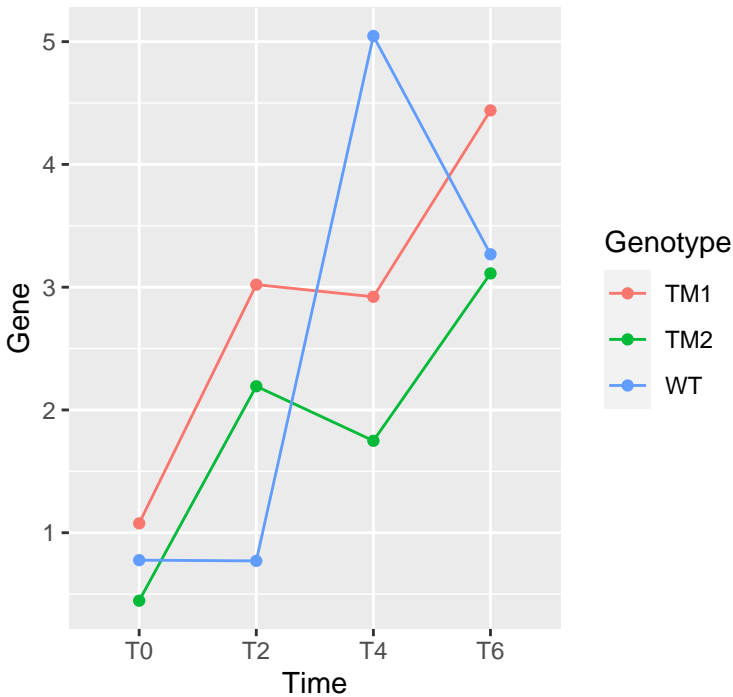

# AT3G12610

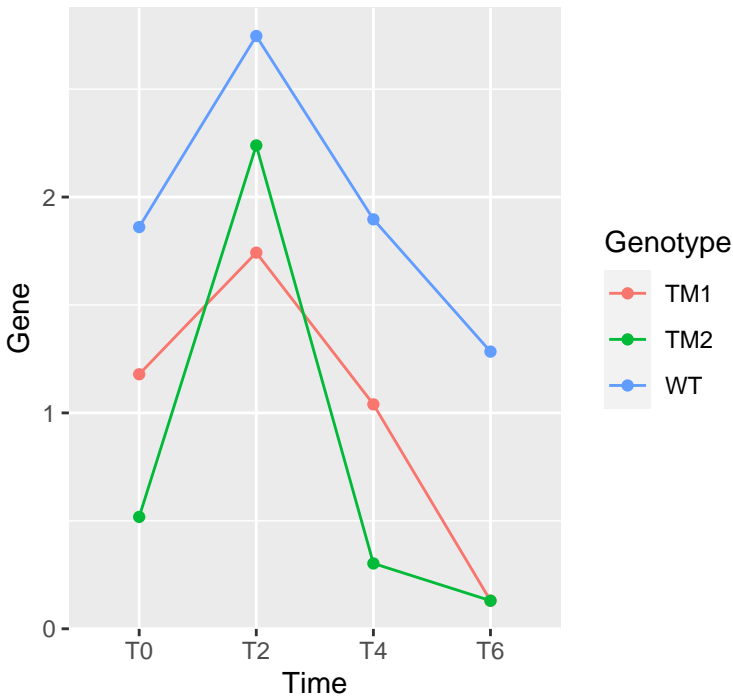

# AT3G12710

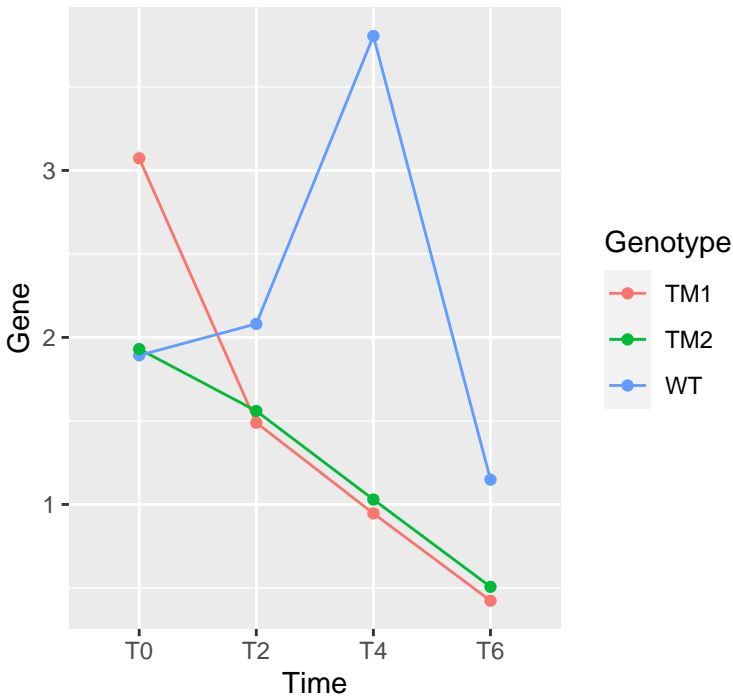

# AT3G13062

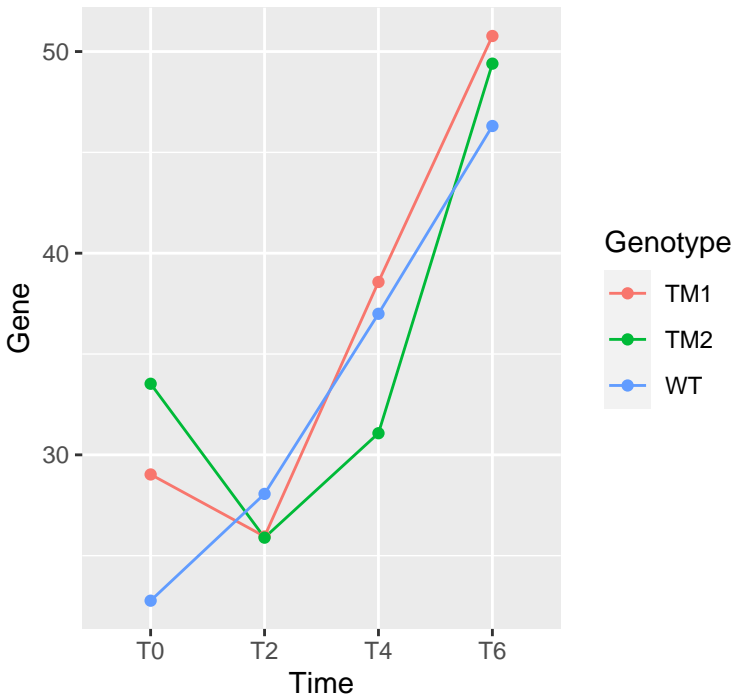

# AT3G13470

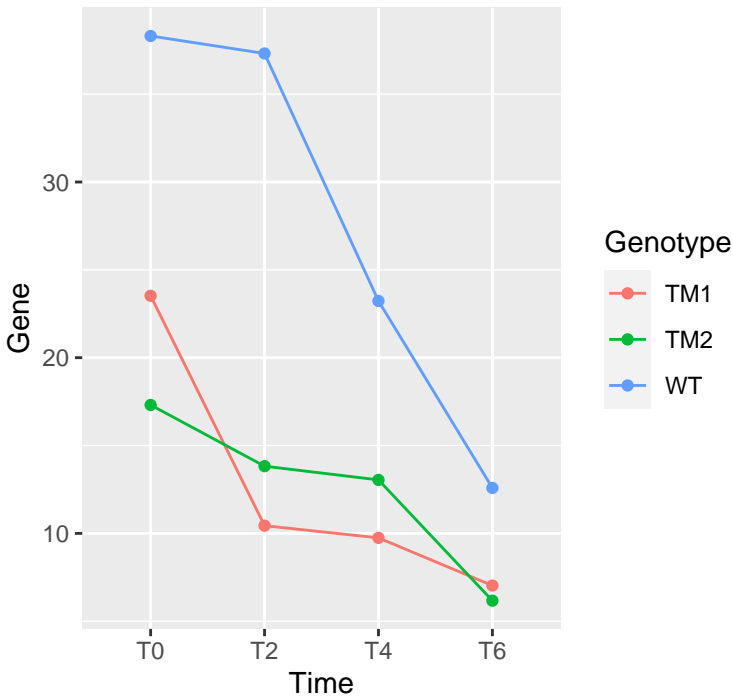

# AT3G14210

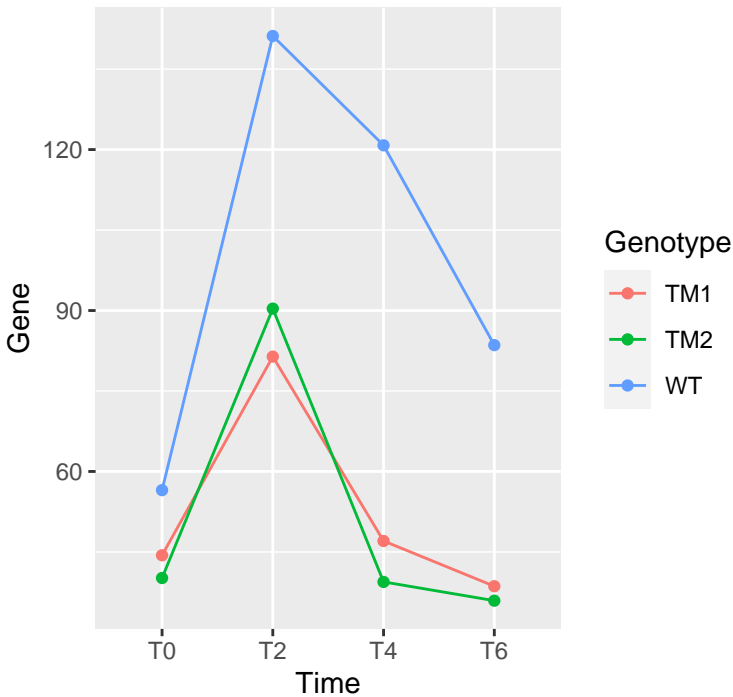

# AT3G15353

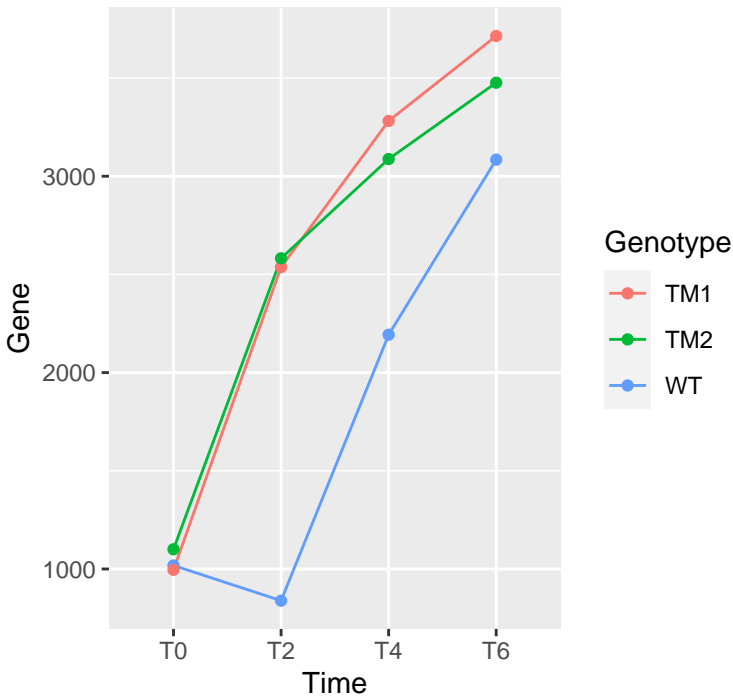



# AT3G15500

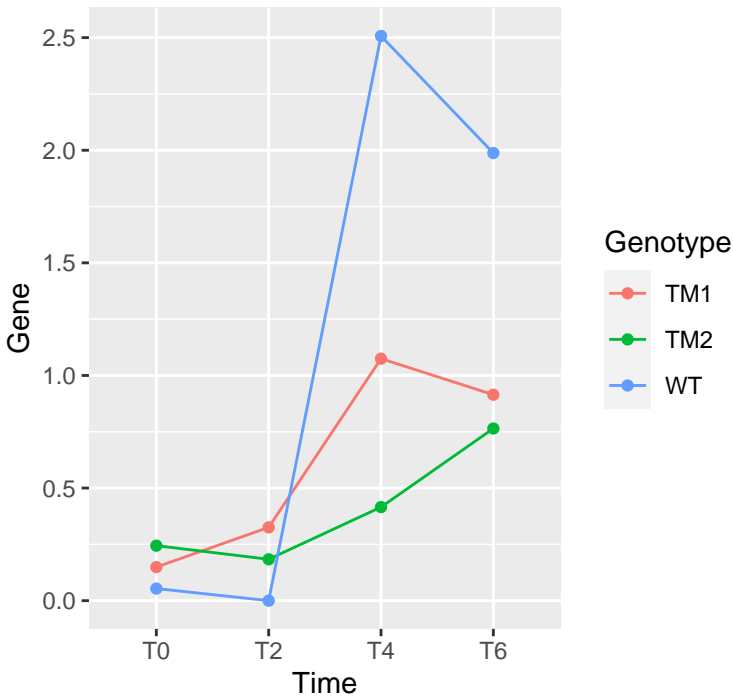

# AT3G17000

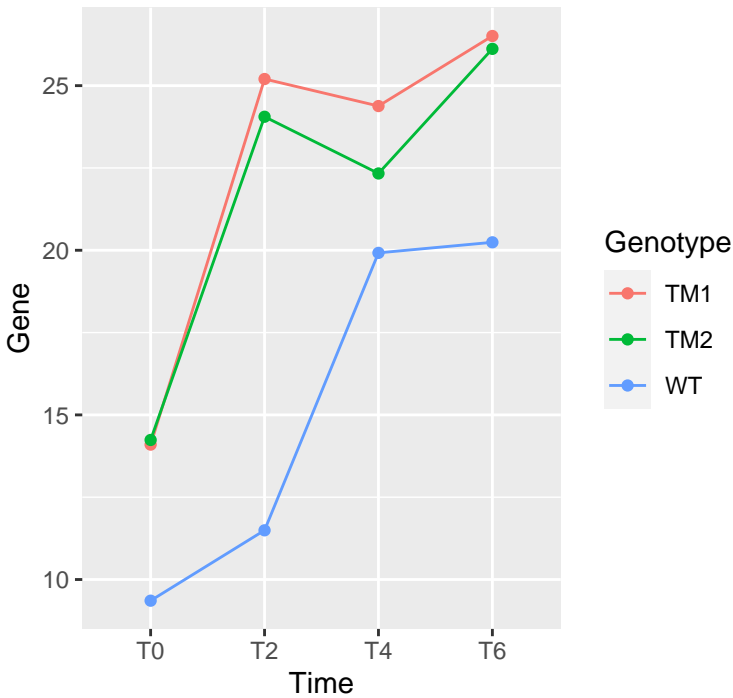

# AT3G17120

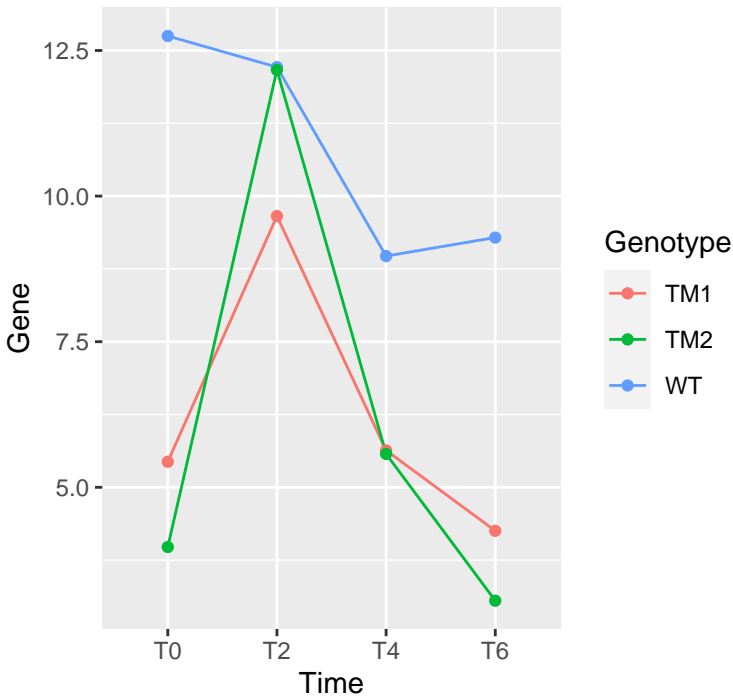

# AT3G17520

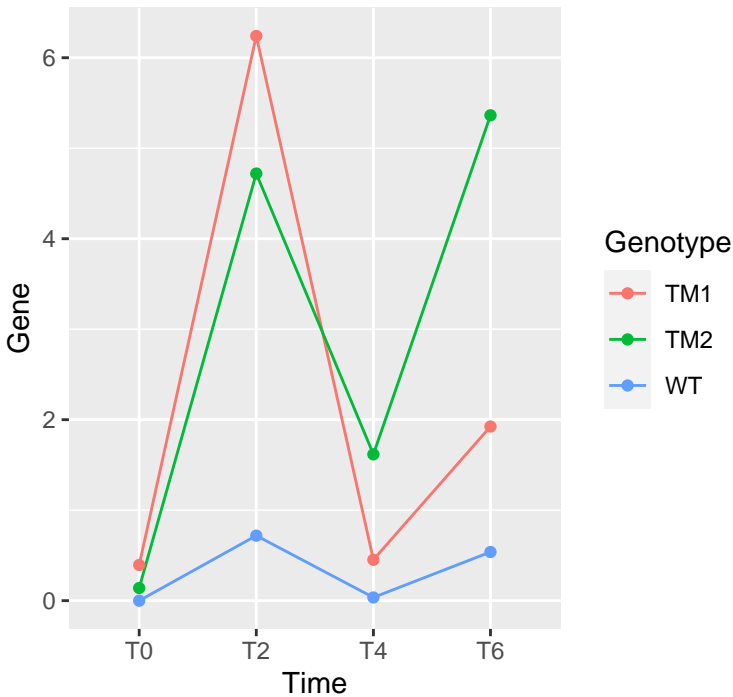

# AT3G17840

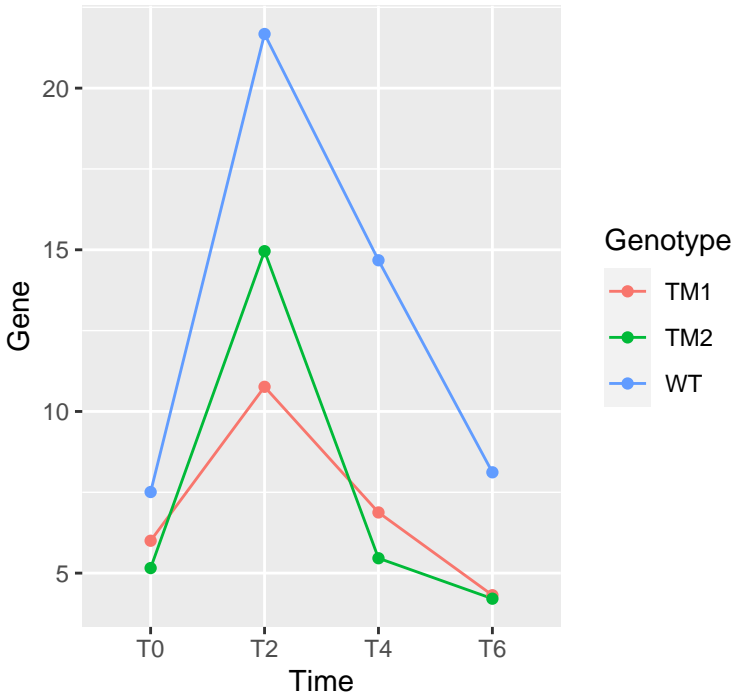

# AT3G19660

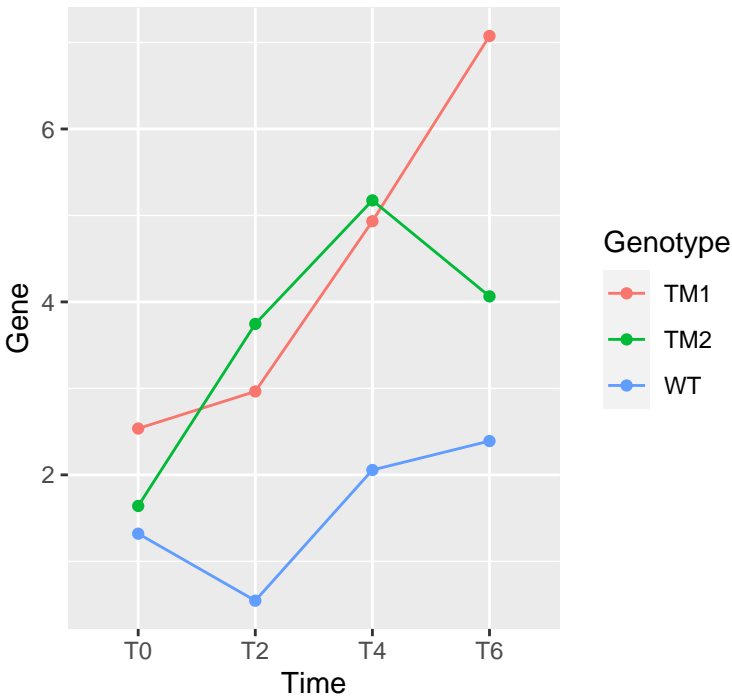

# AT3G19820

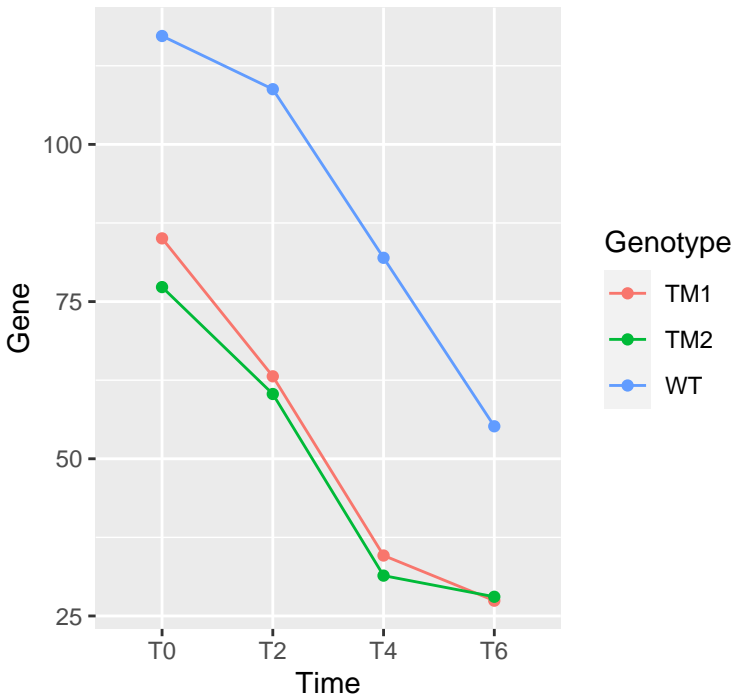

# AT3G20090

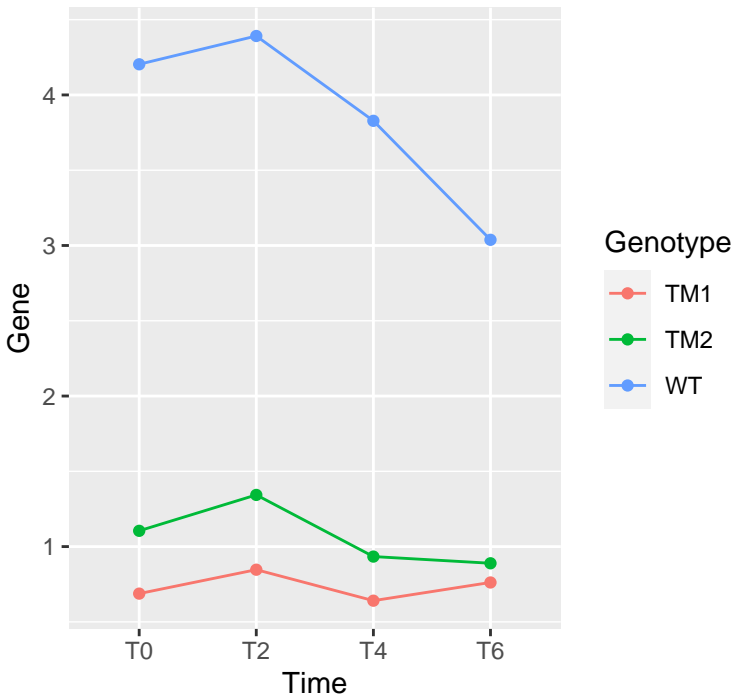



# AT3G20100

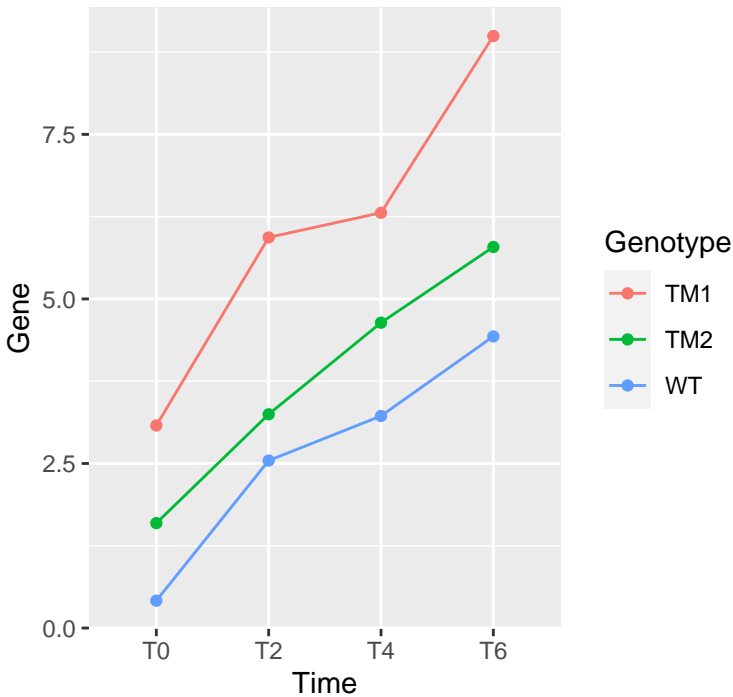

# AT3G20470

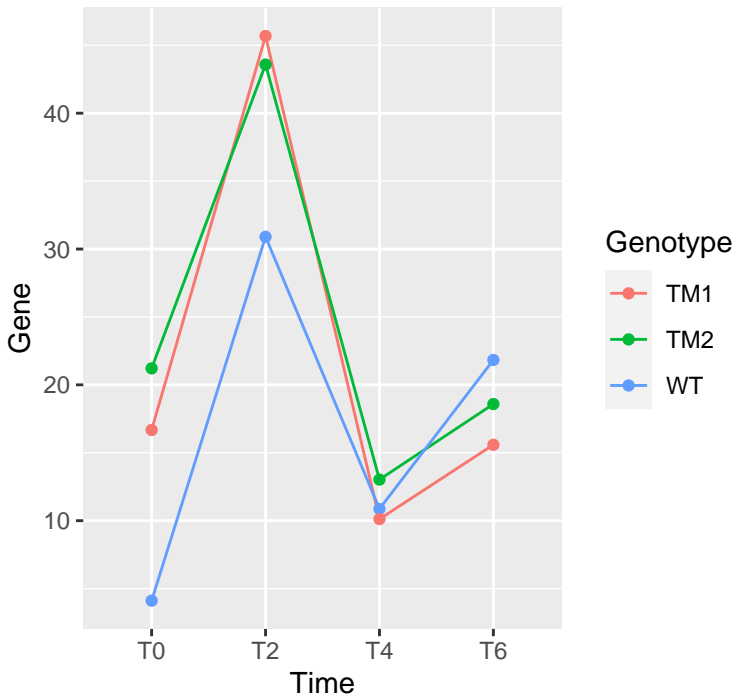

# AT3G20810

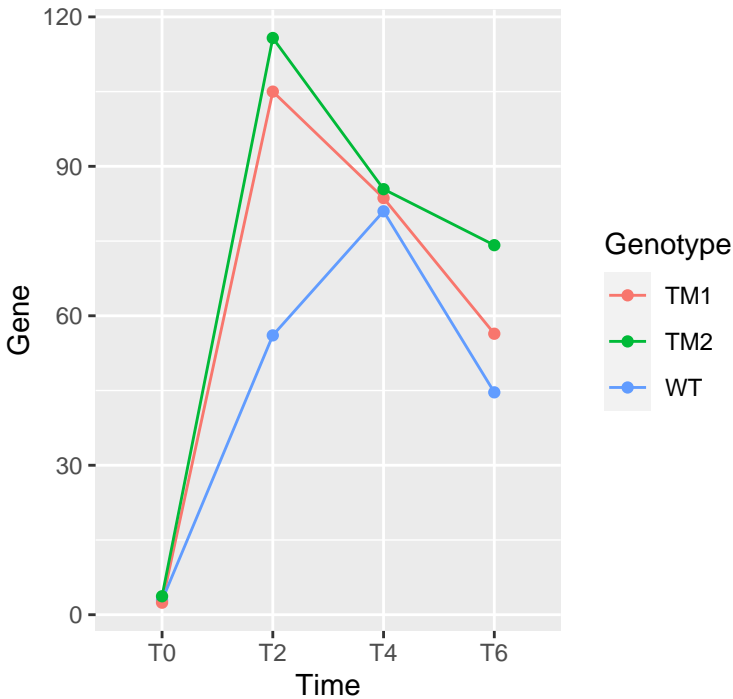

# AT3G20960

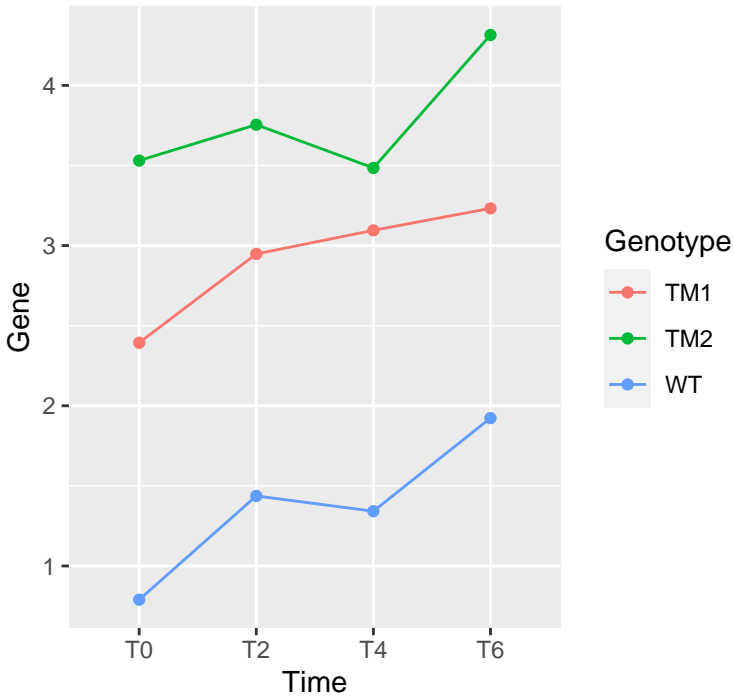

# AT3G22120

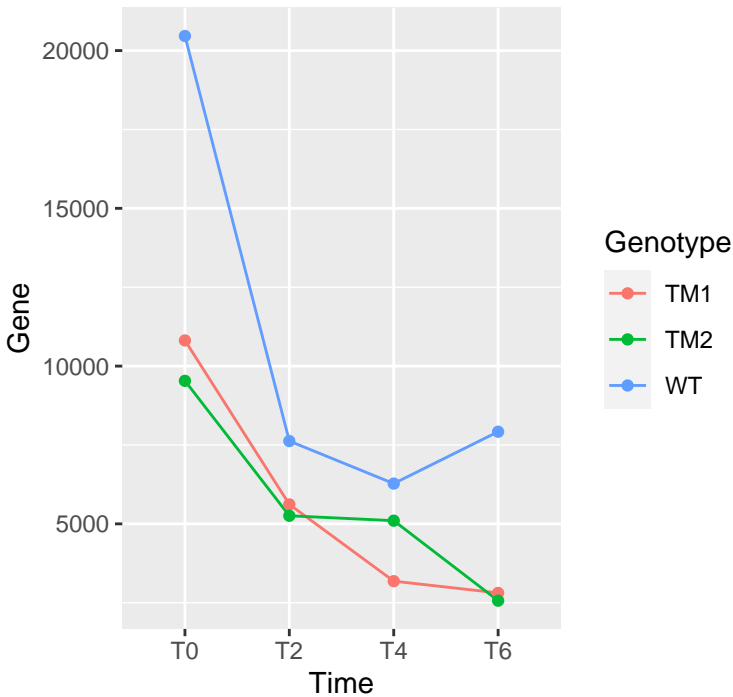

# AT3G22142

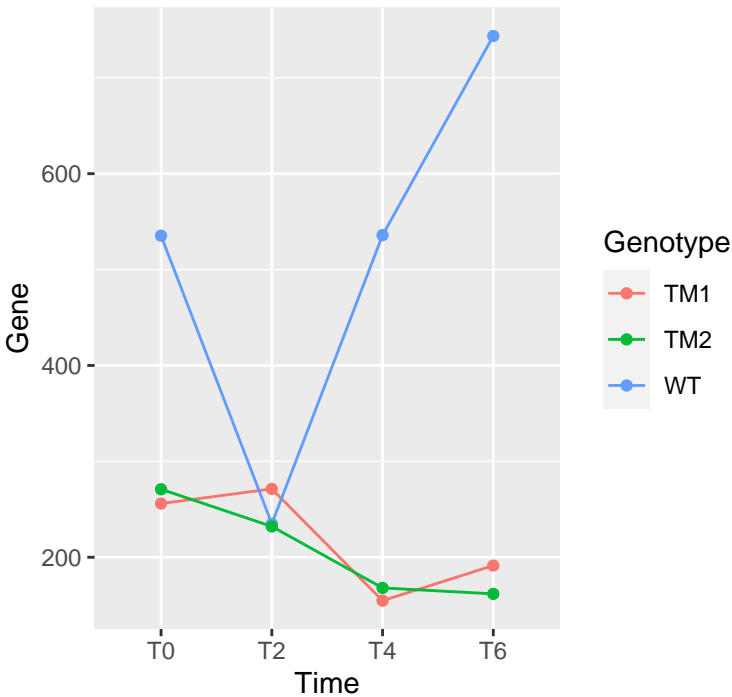

# AT3G22750

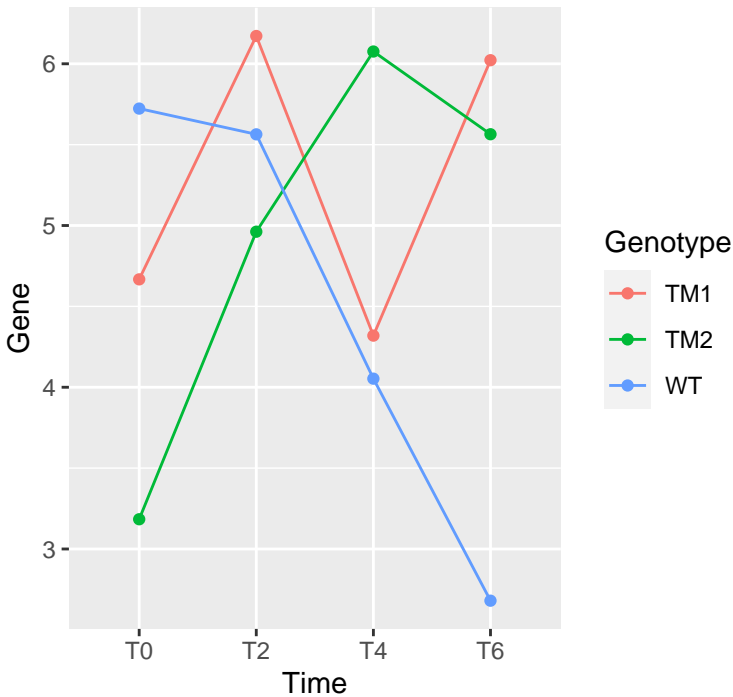

# AT3G25100

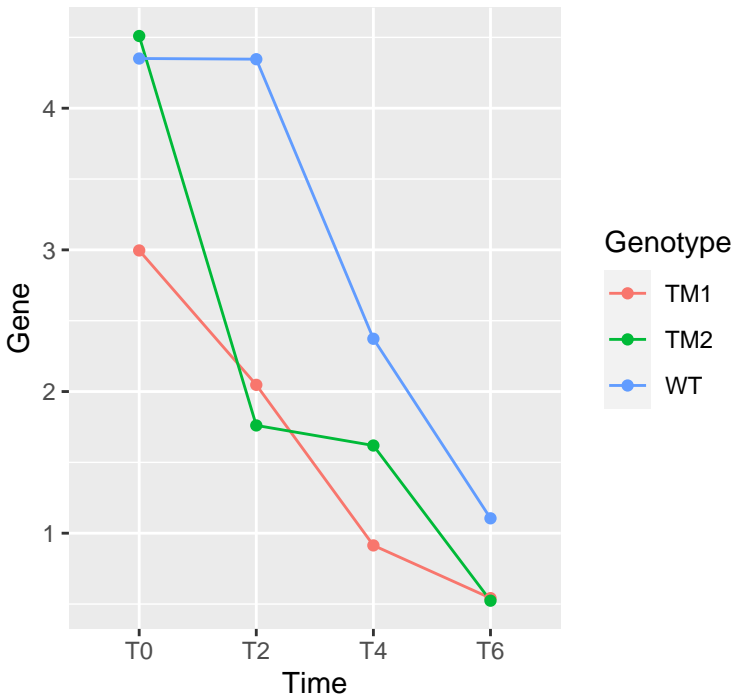



# AT3G25760

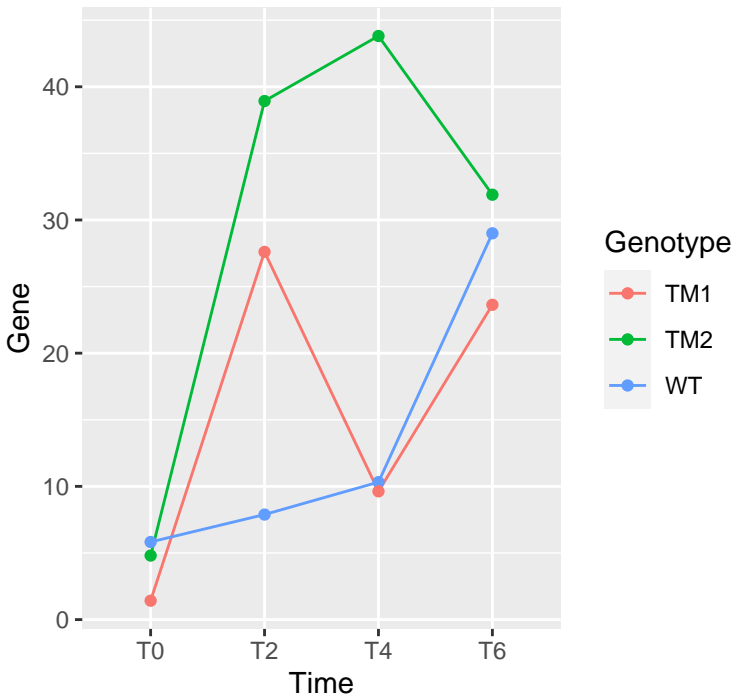

# AT3G26220

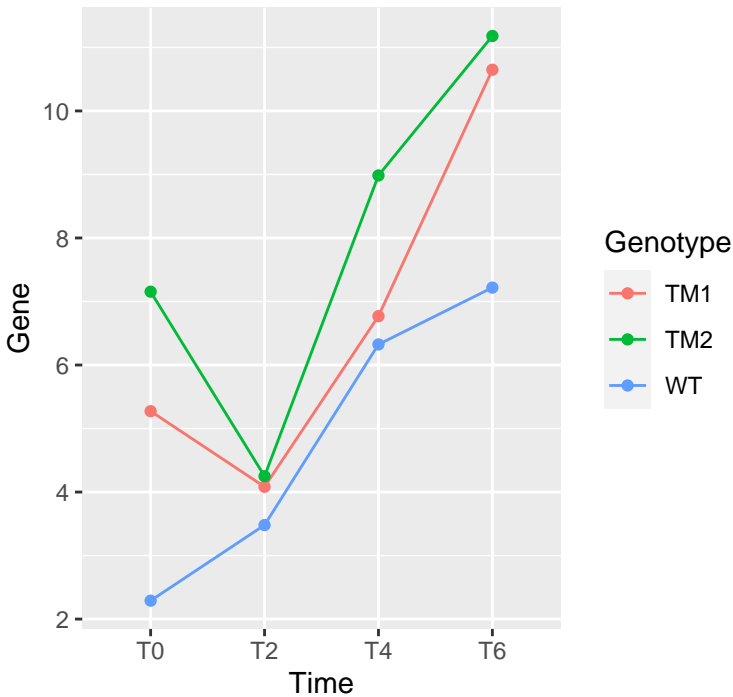

# AT3G27060

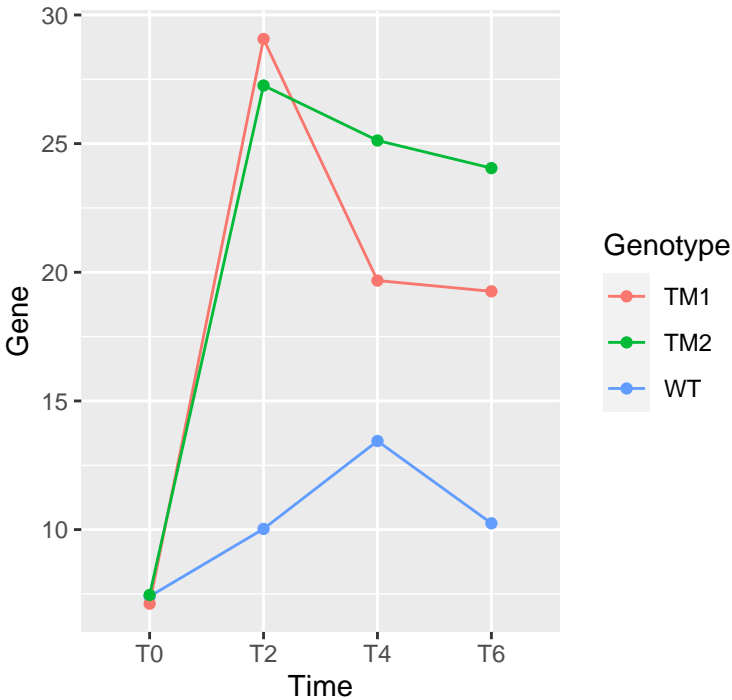

# AT3G28210

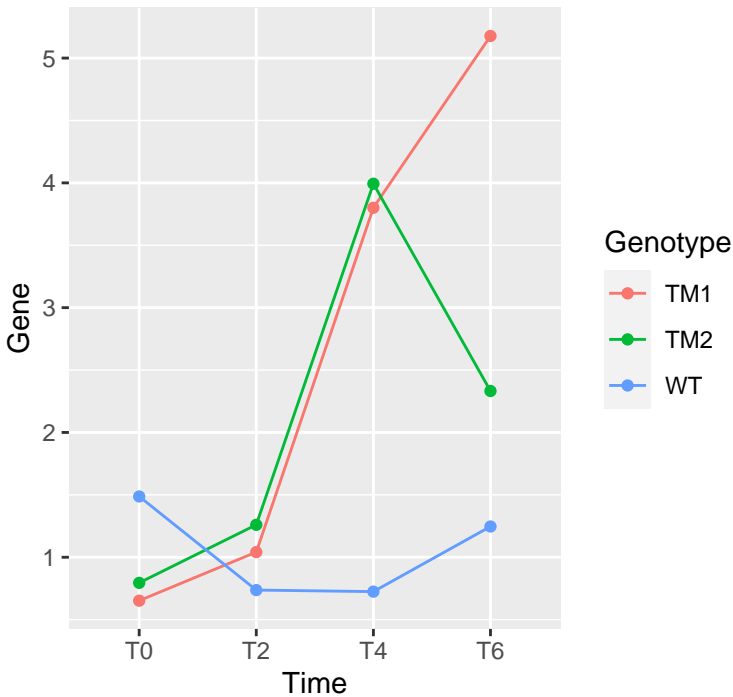

# AT3G28920

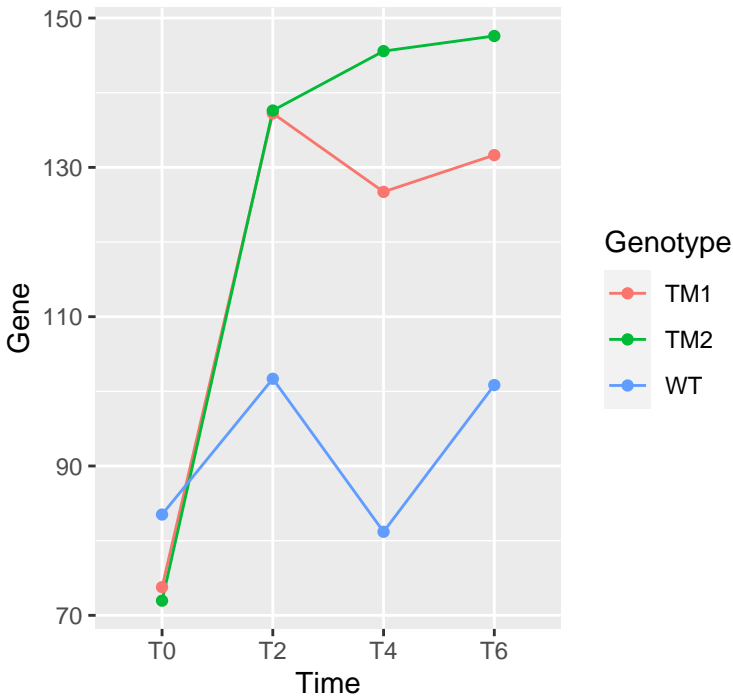

# AT3G29034

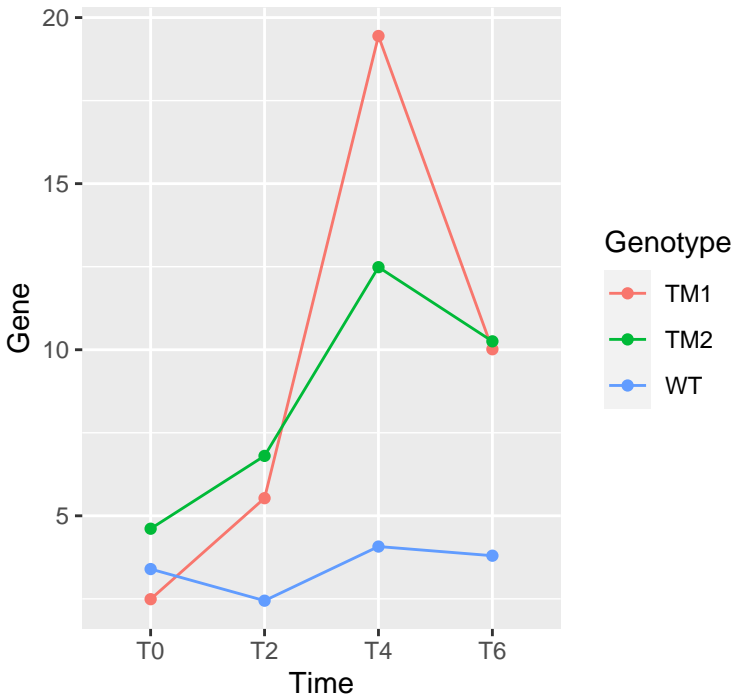

# AT3G46490

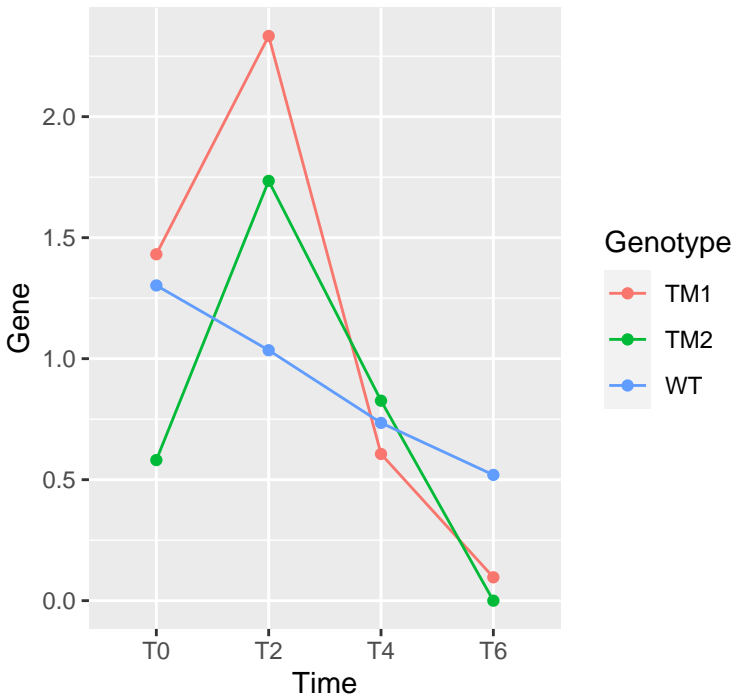

# AT3G47340

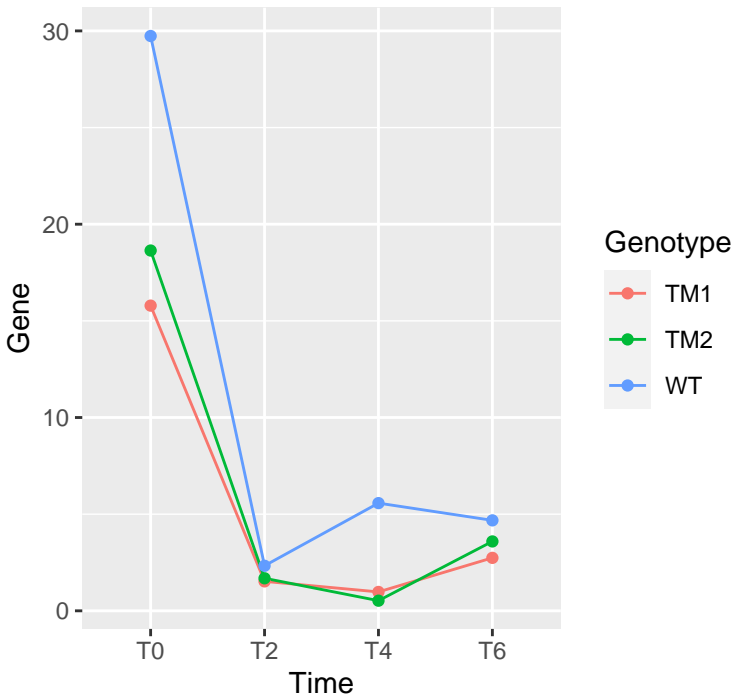



# AT3G47480

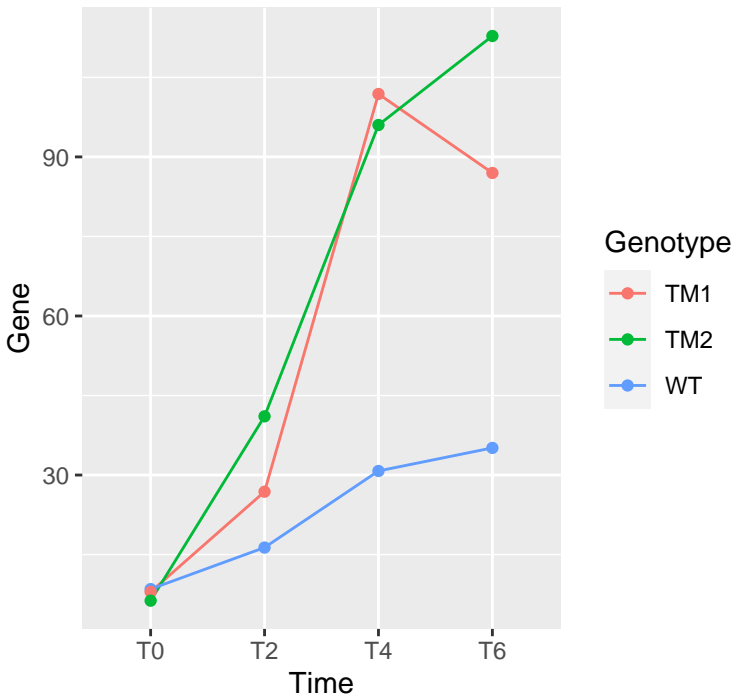

# AT3G49250

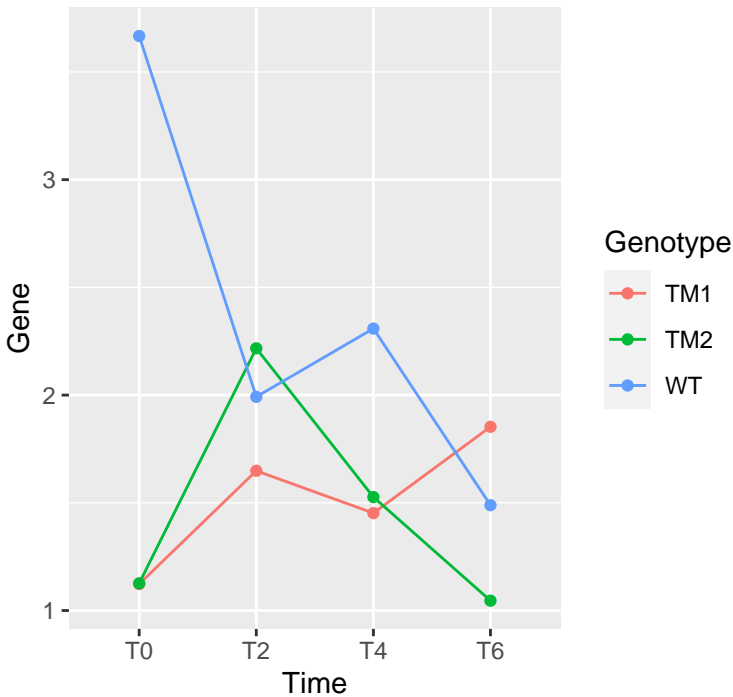

# AT3G49260

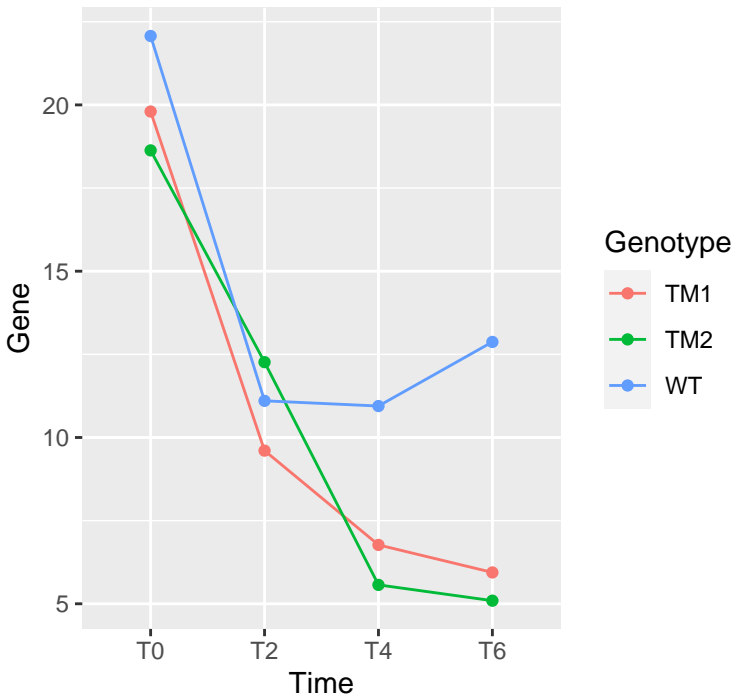

# AT3G49580

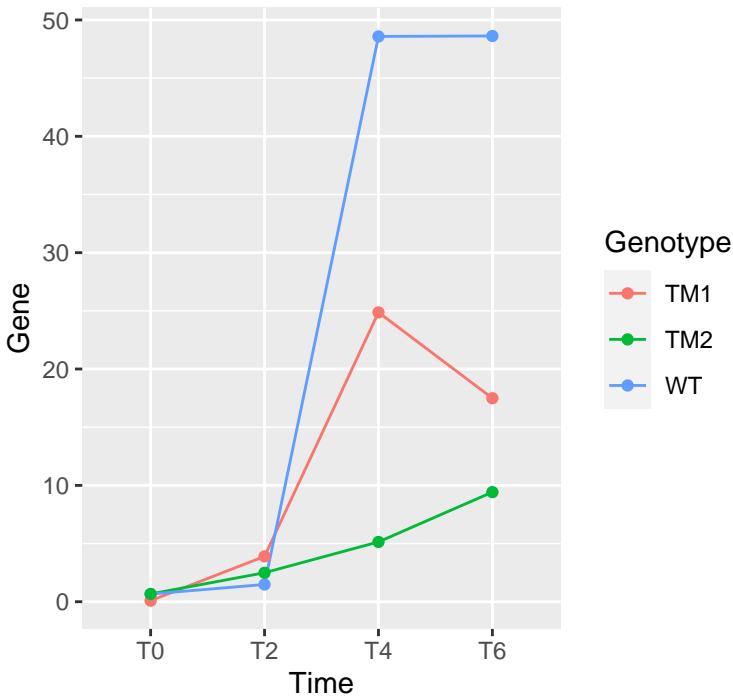

# AT3G49780

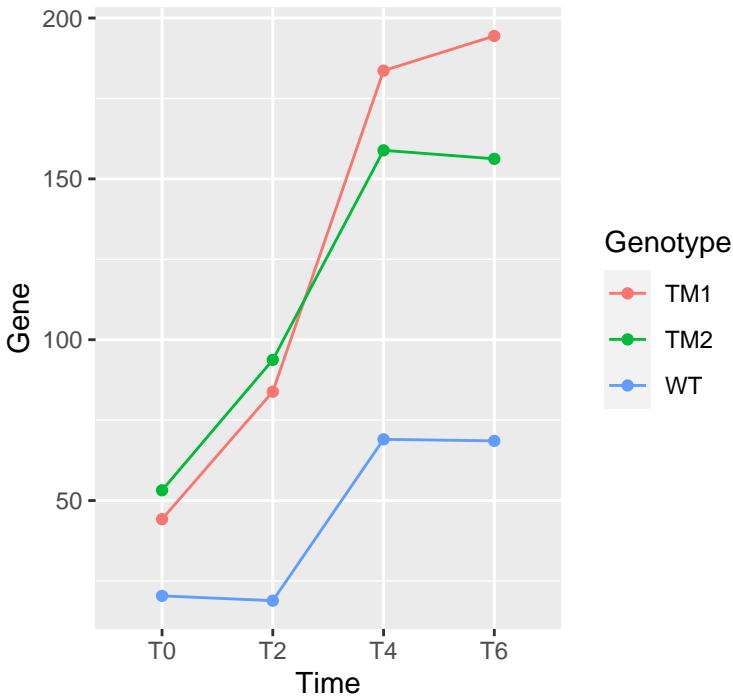

# AT3G50260

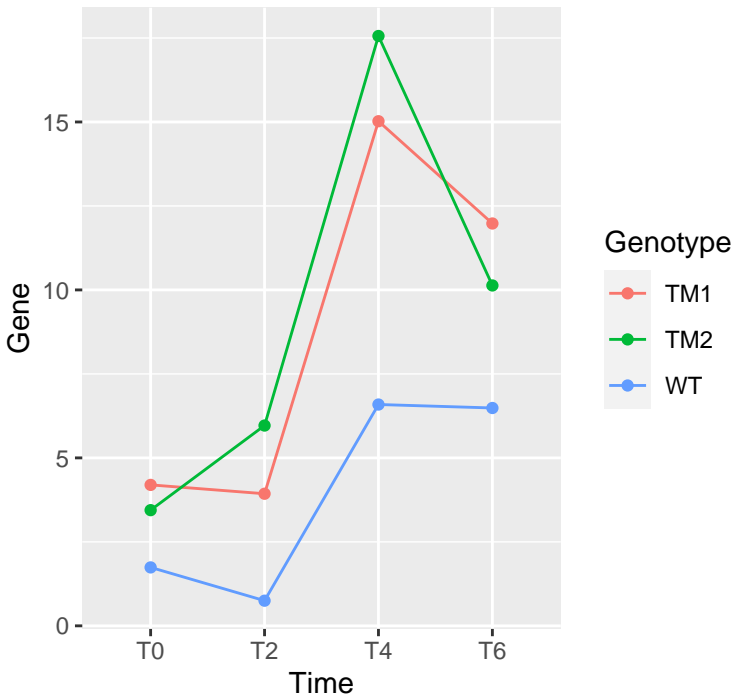

# AT3G50770

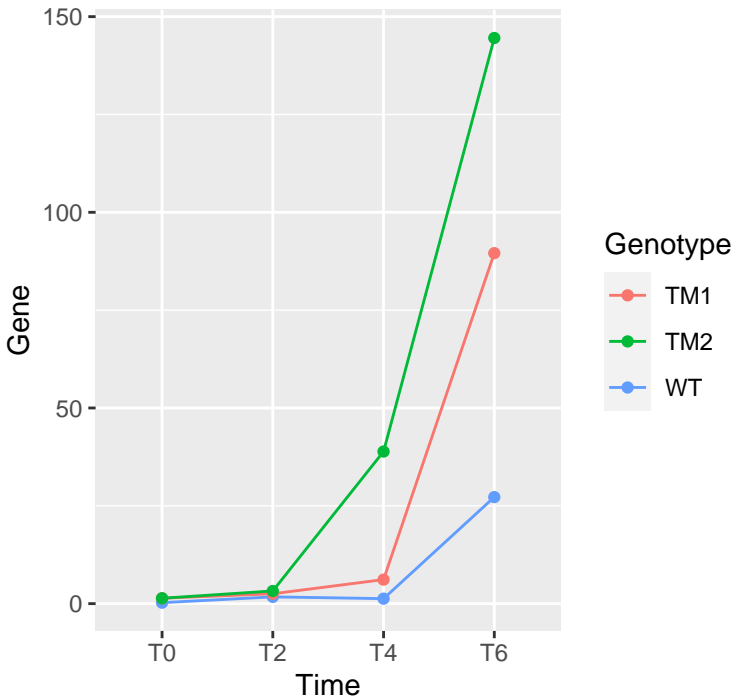

# AT3G51860

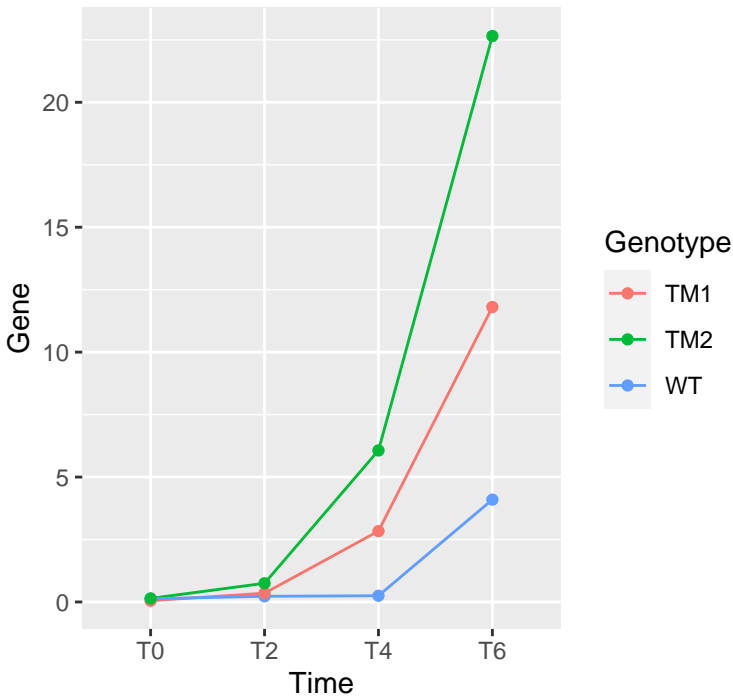



# AT3G53850

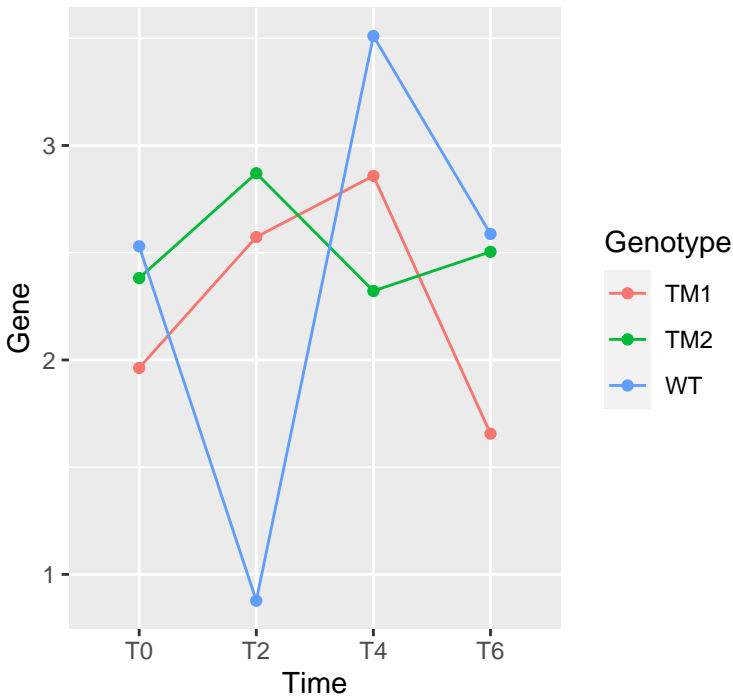

# AT3G54200

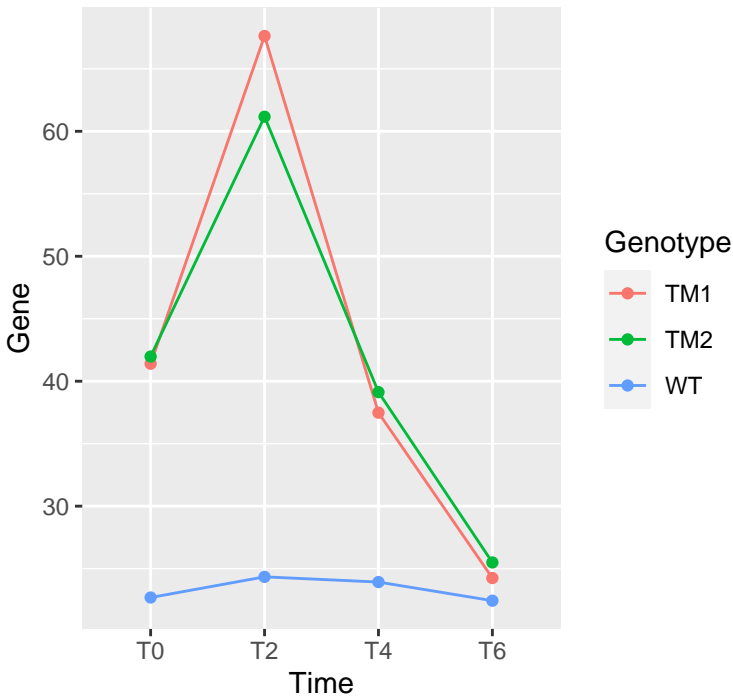

# AT3G55120

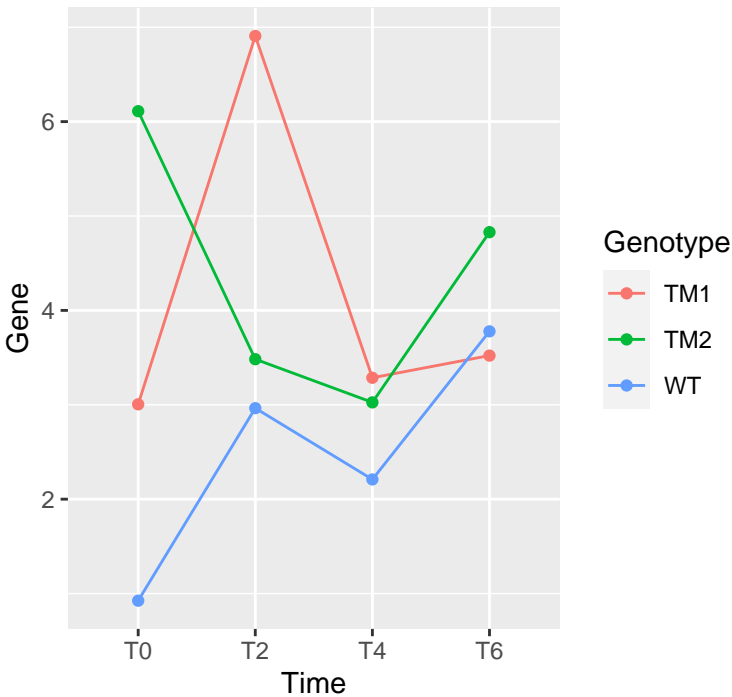

# AT3G55500

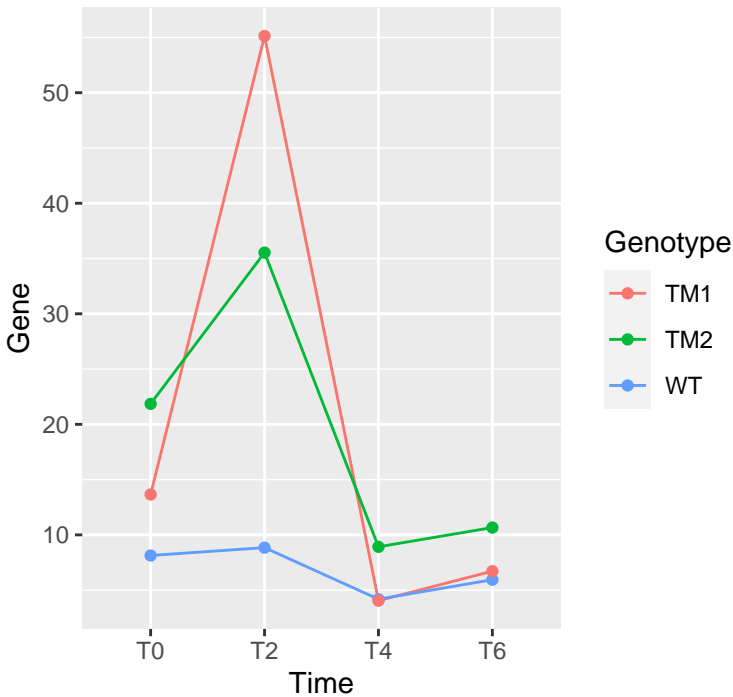

# AT3G56240

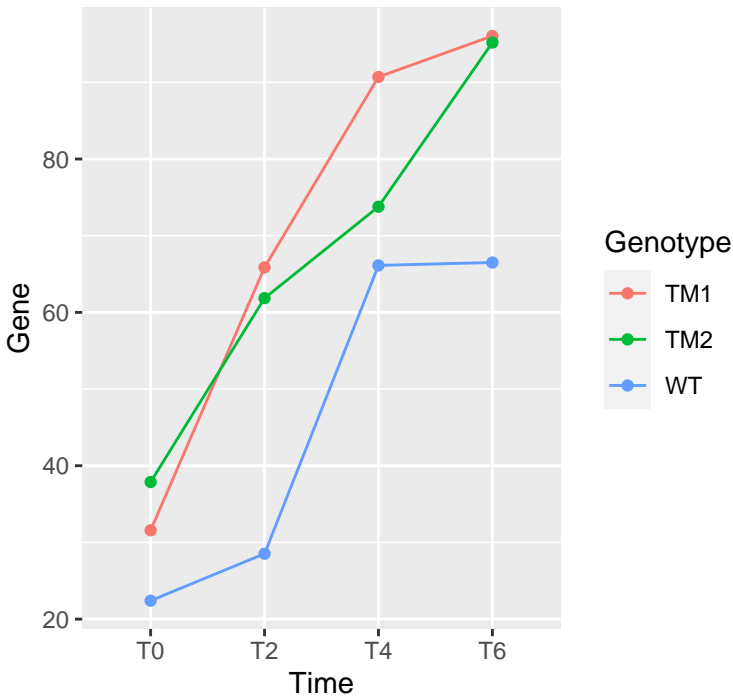

# AT3G56400

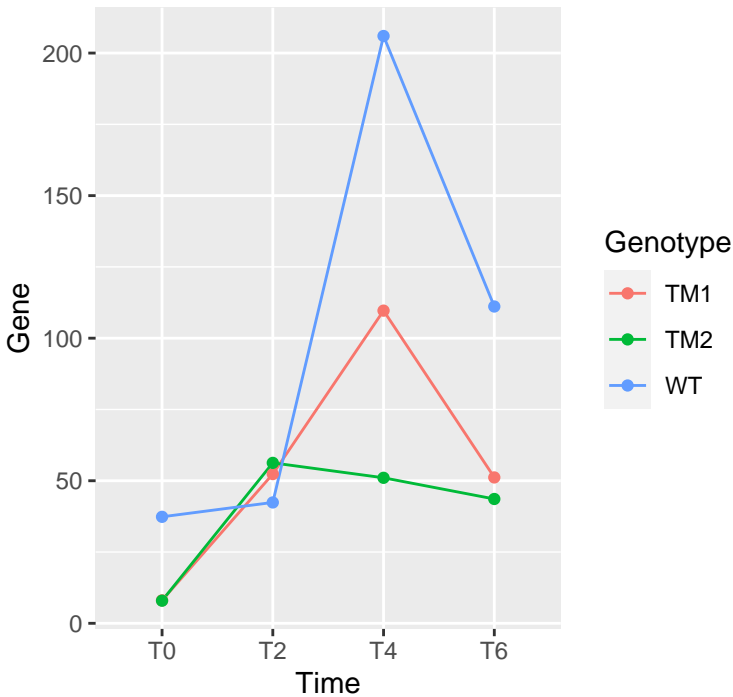

# AT3G56790

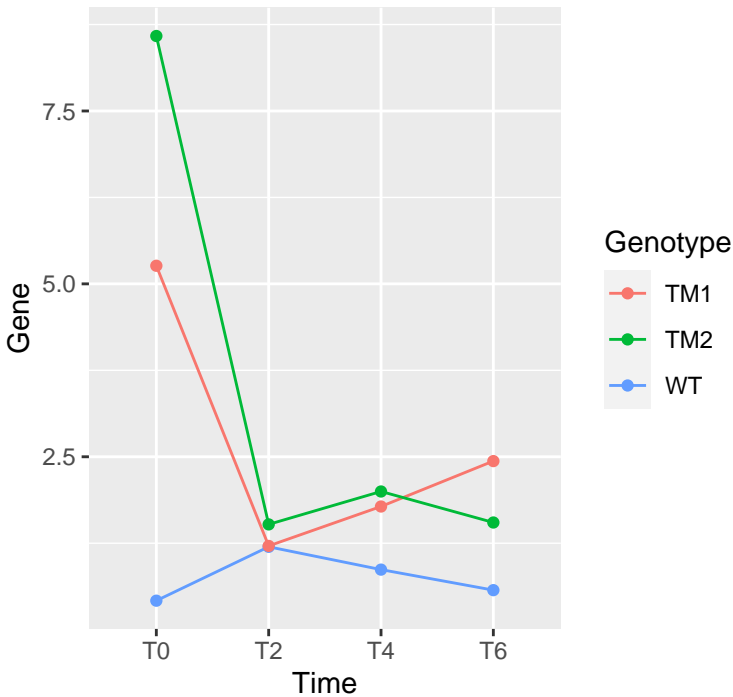

# AT3G57780

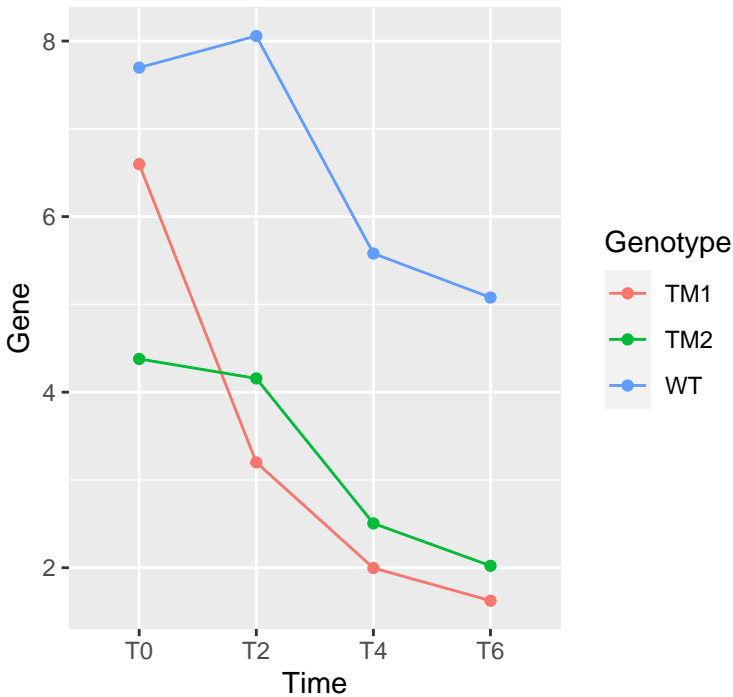



# AT3G58120

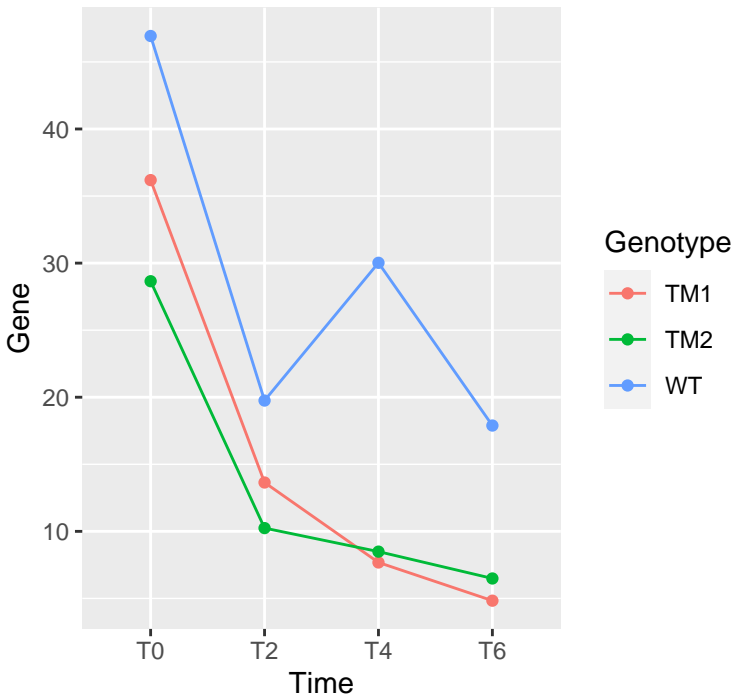

# AT3G58610

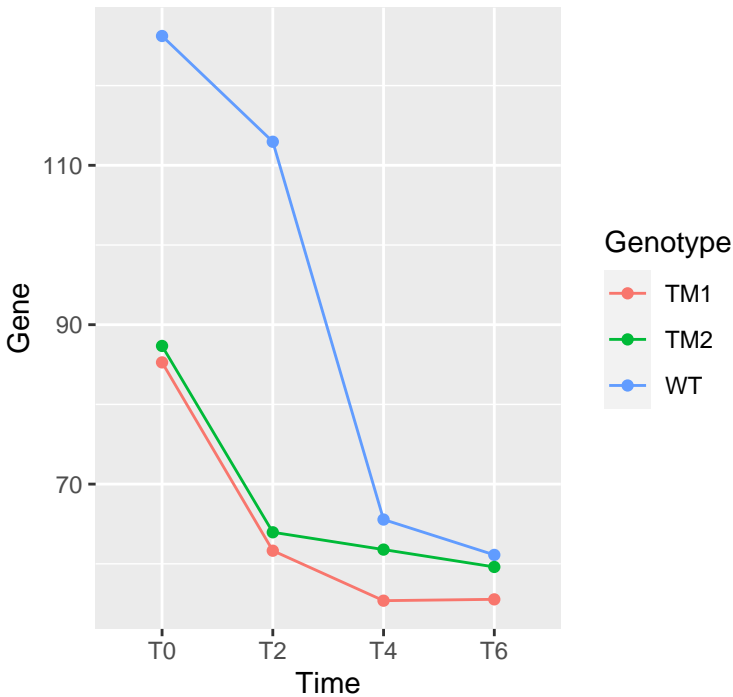

# AT3G59880

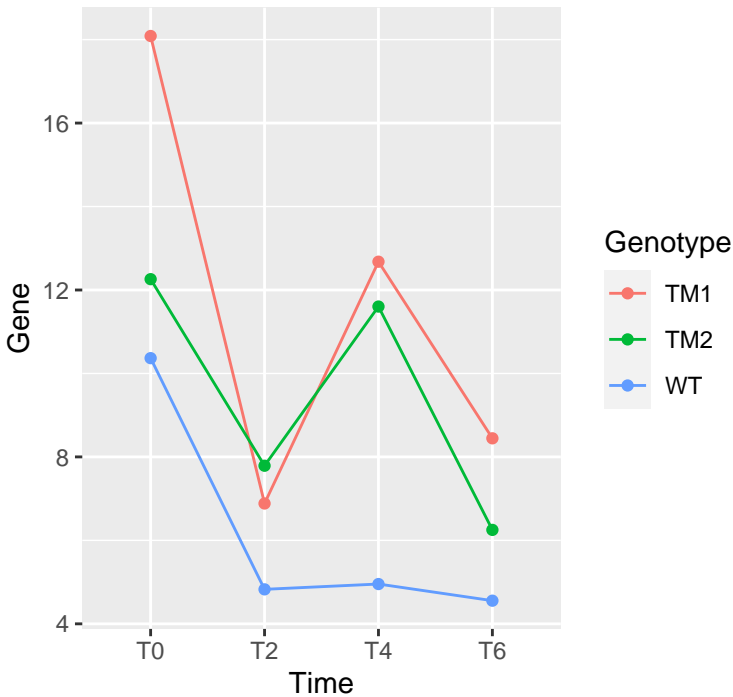

# AT3G60640

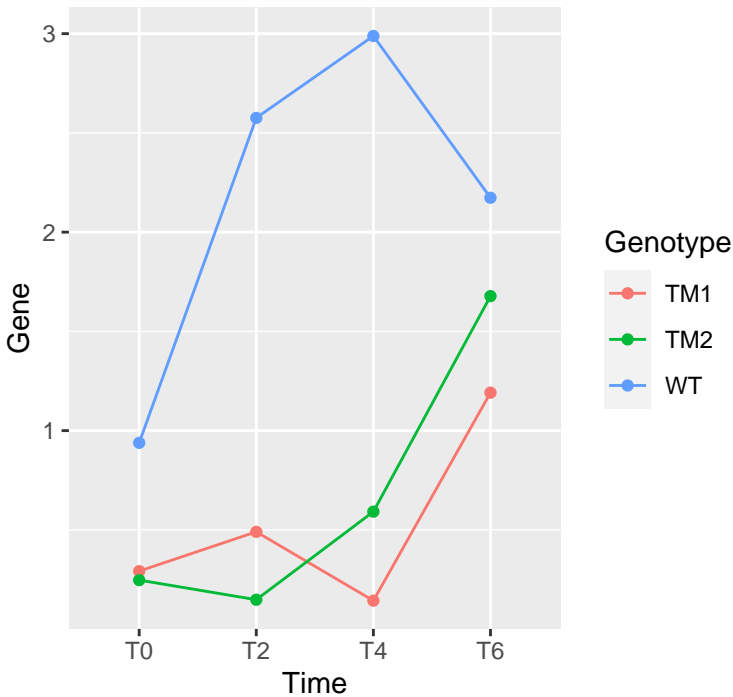

# AT3G60840

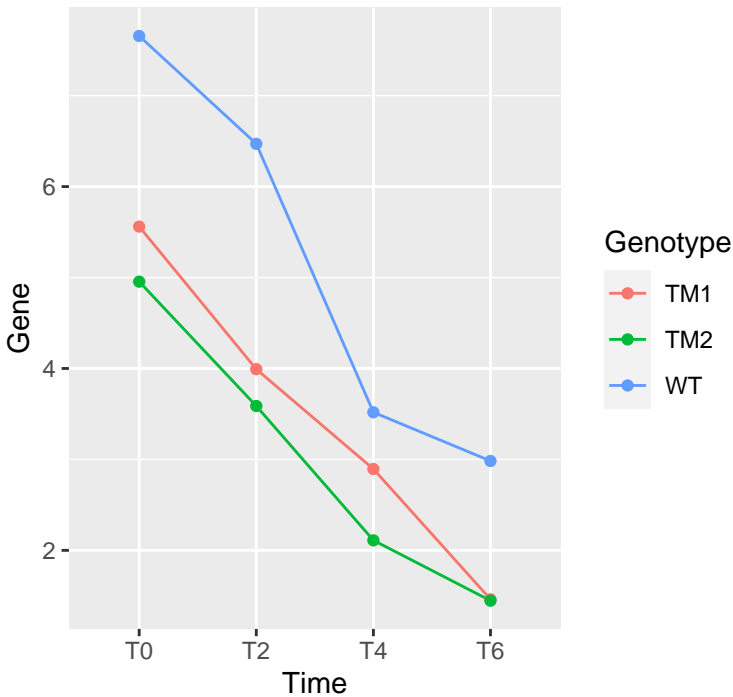

# AT3G62530

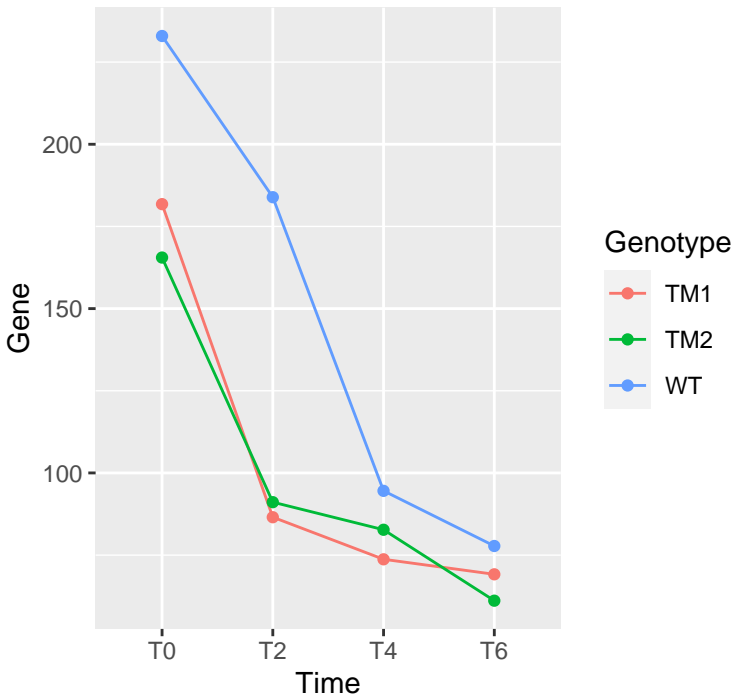

# AT3G62590

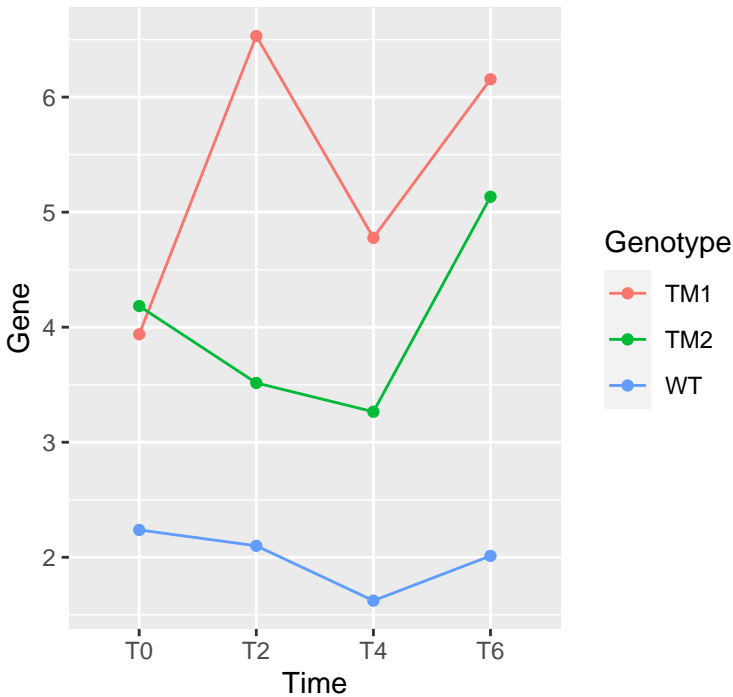

# AT3G62770

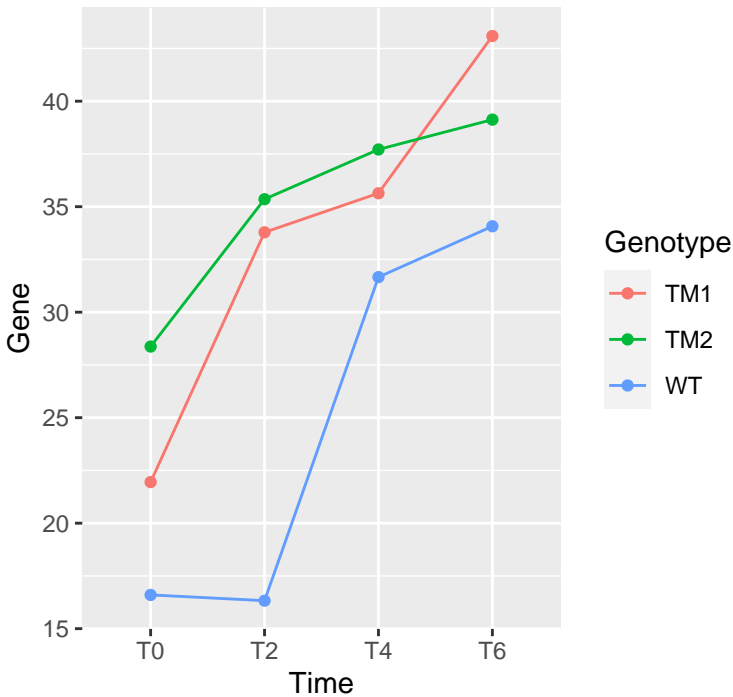



# AT3G63450

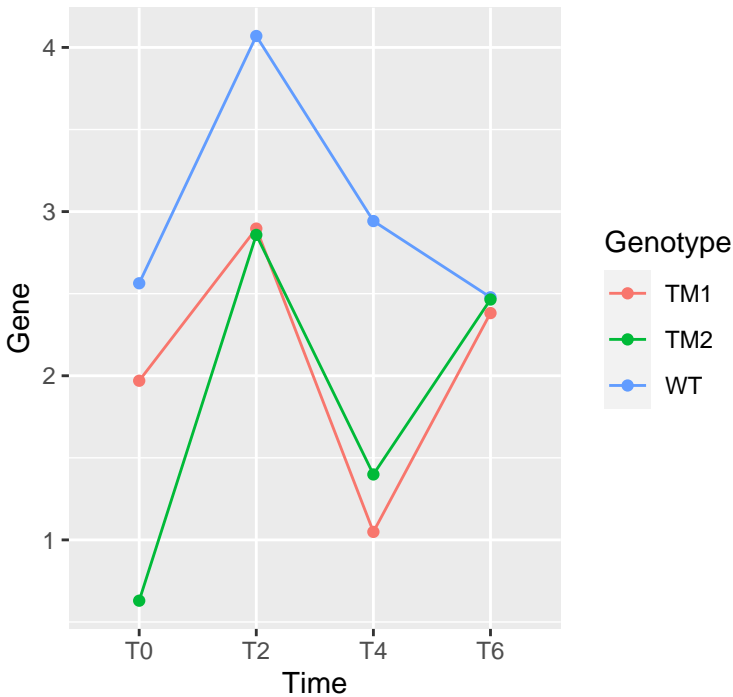

# AT4G00670

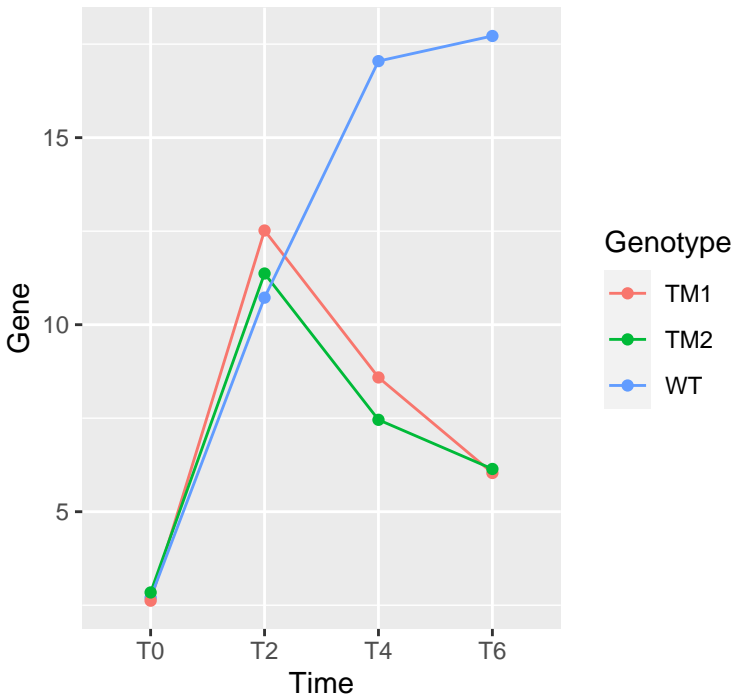

# AT4G00870

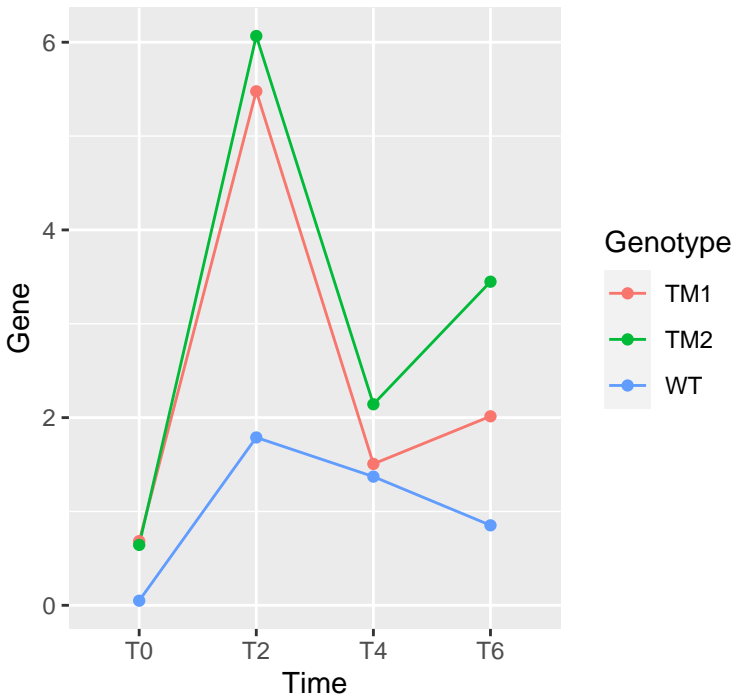

# AT4G00955

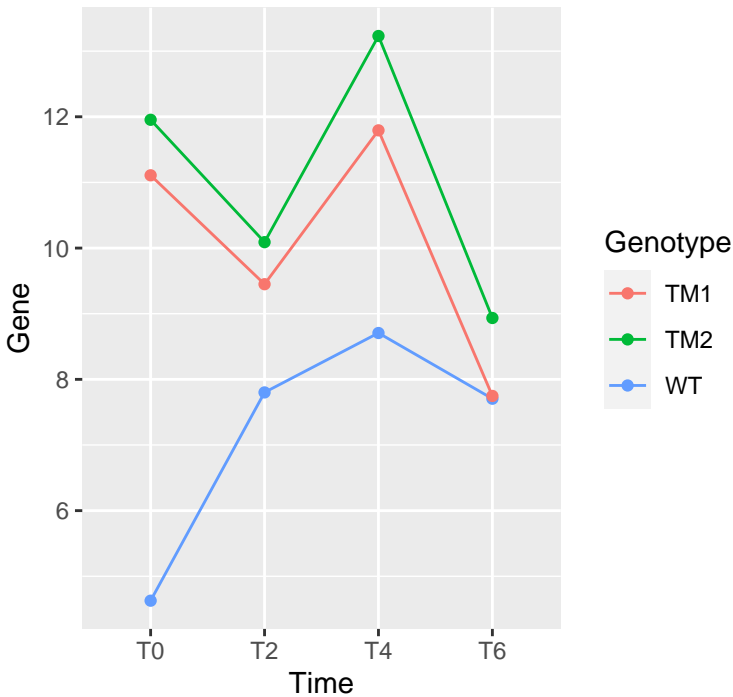

# AT4G01600

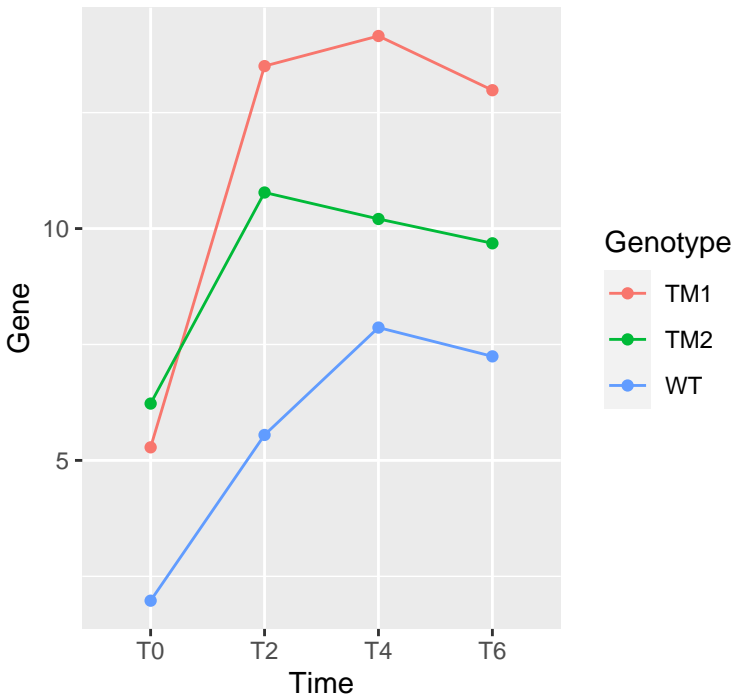

# AT4G01700

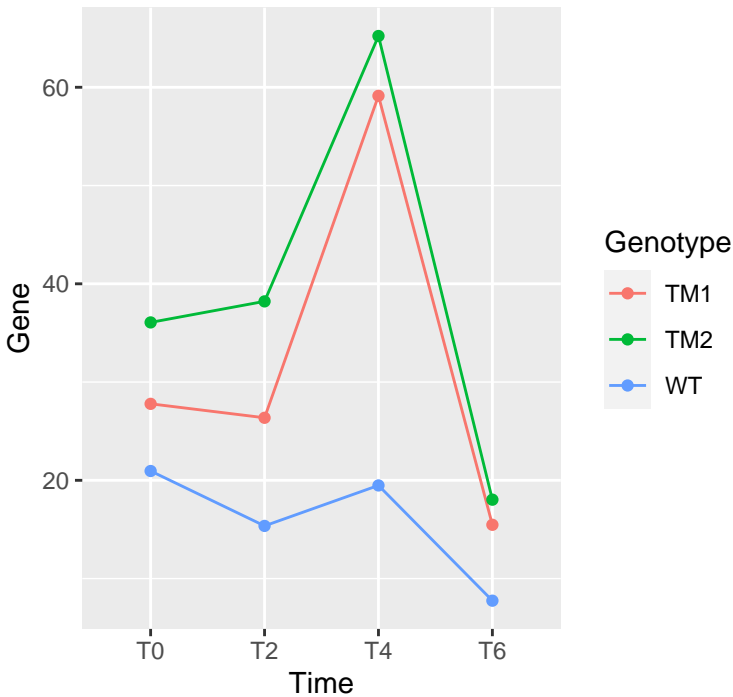

# AT4G01720

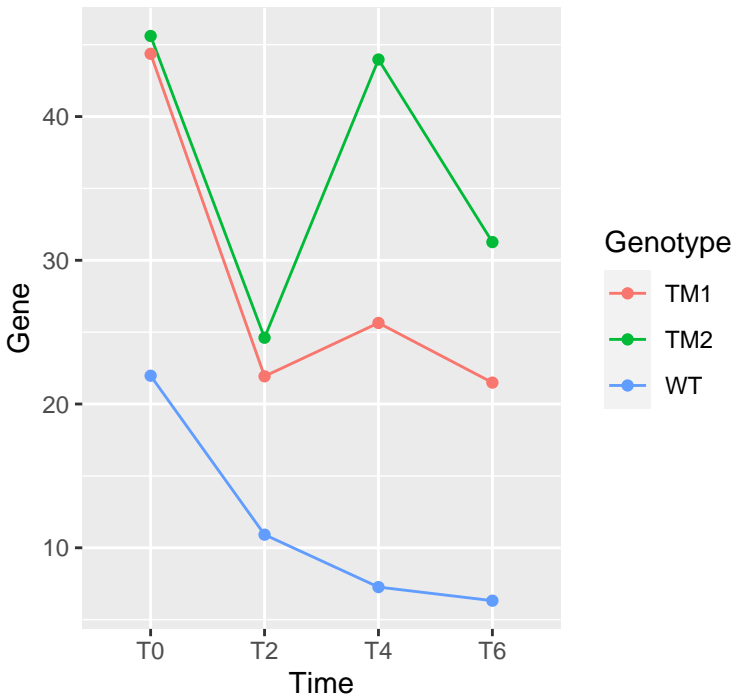

# AT4G02380

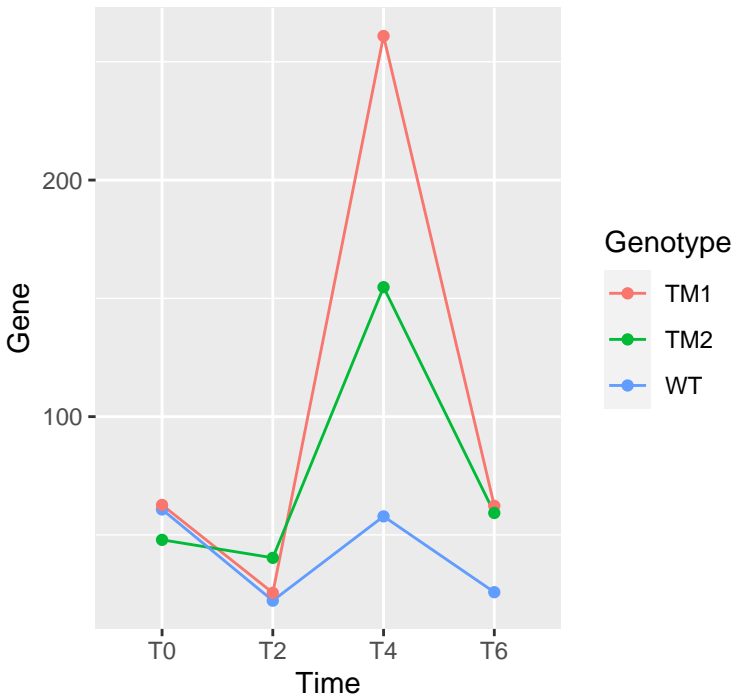



# AT4G05050

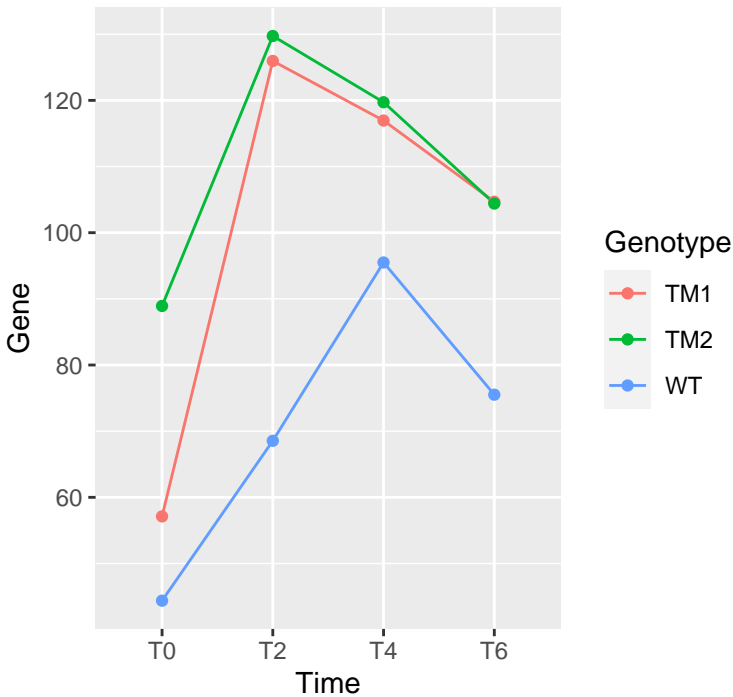

# AT4G08290

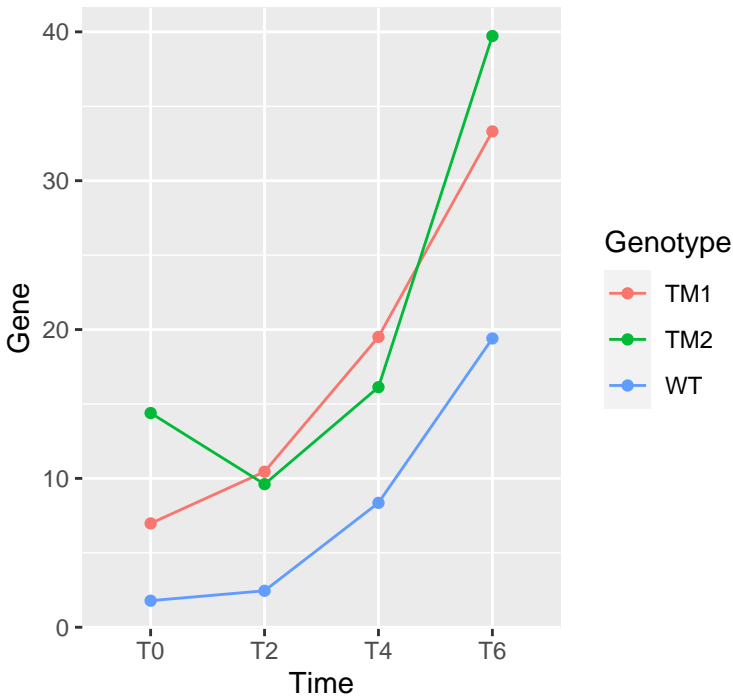

# AT4G12120

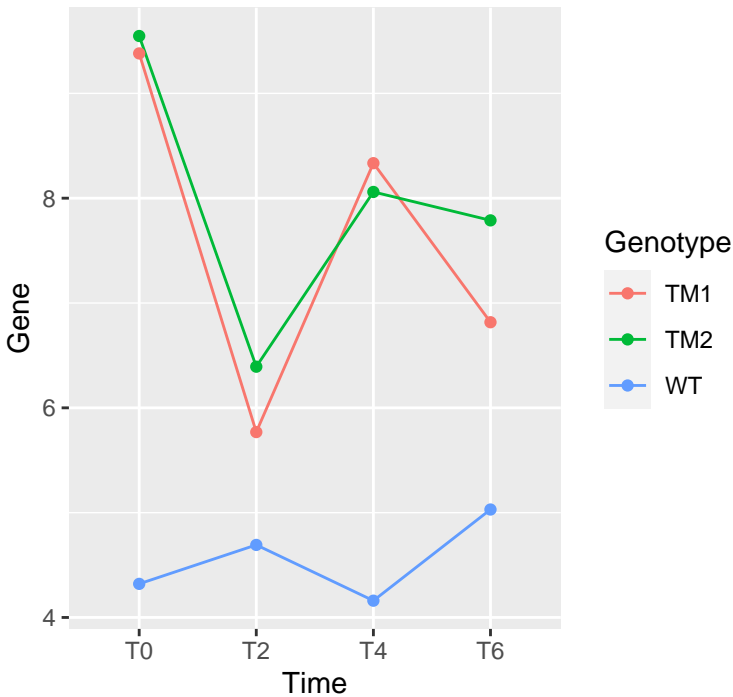

# AT4G12420

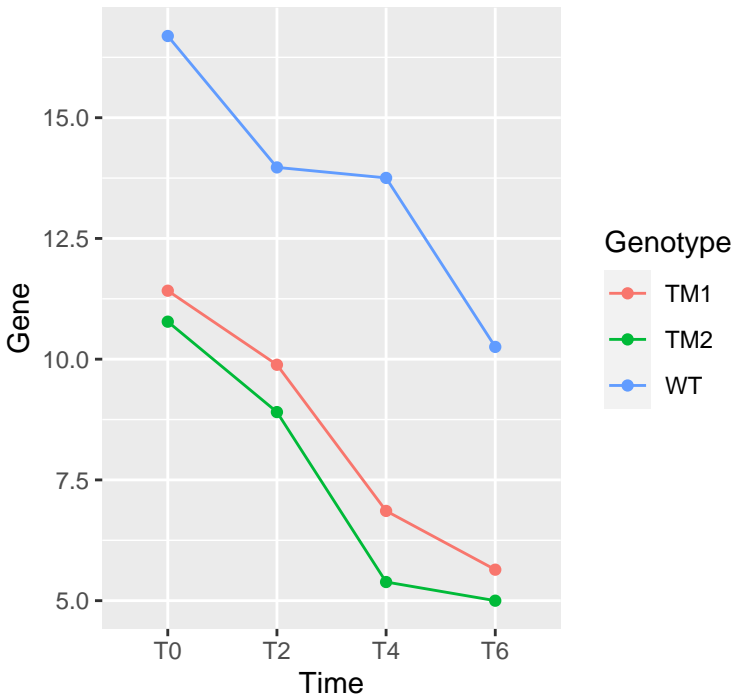

# AT4G12730

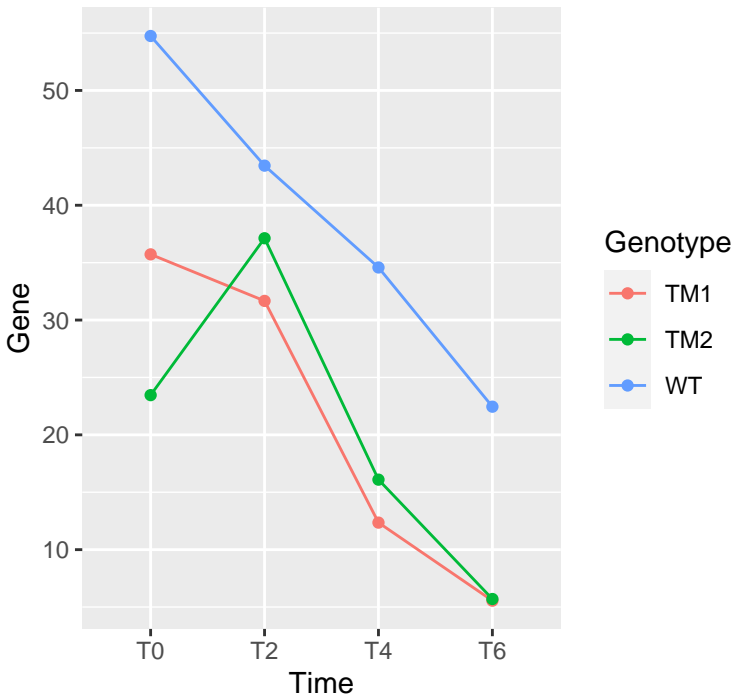

# AT4G12970

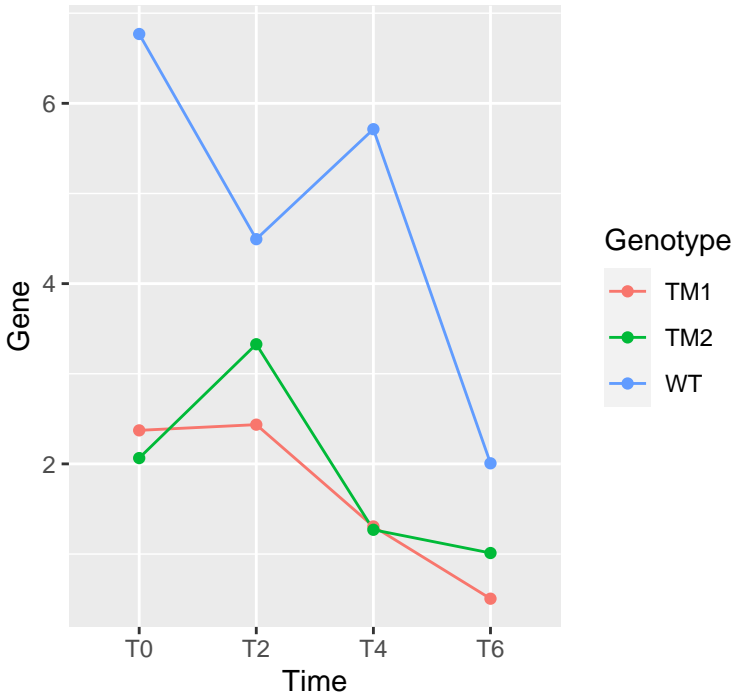

# AT4G14020

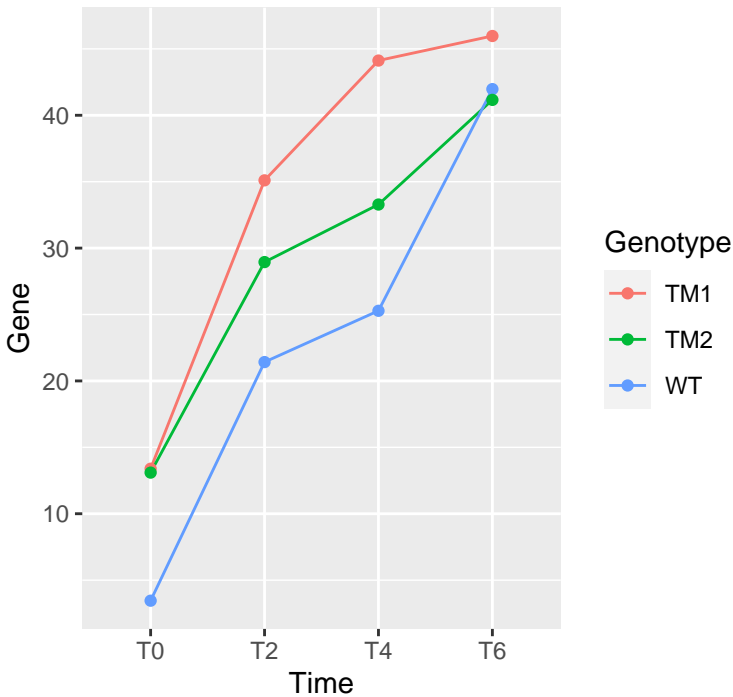

# AT4G14750

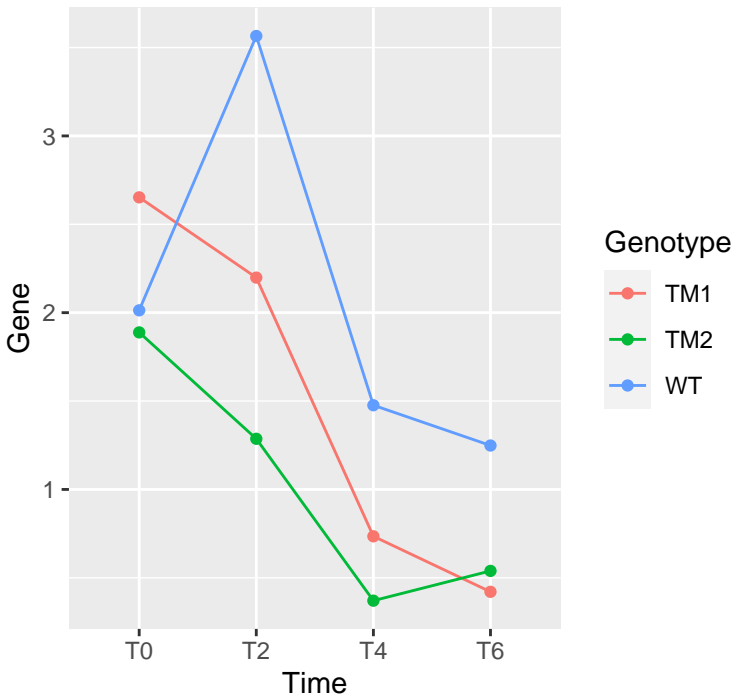



# AT4G15470

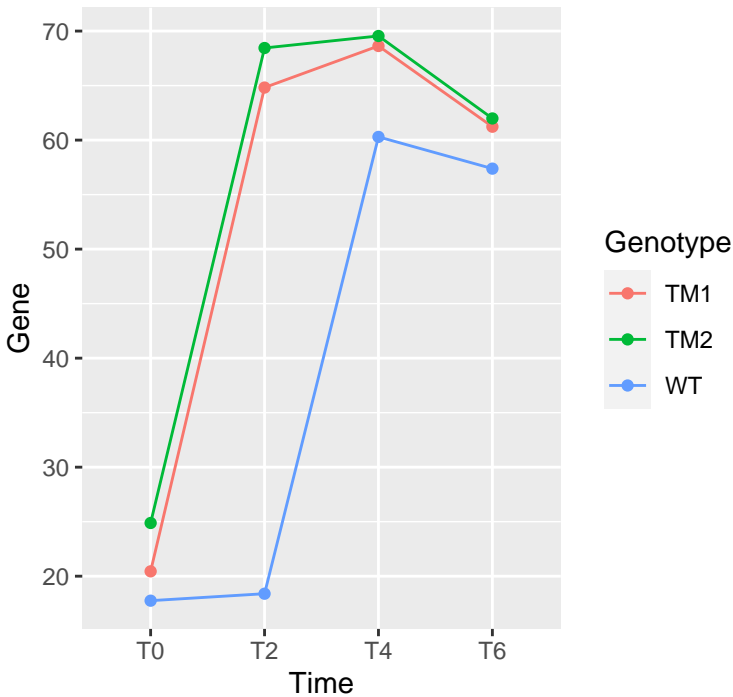

# AT4G16680

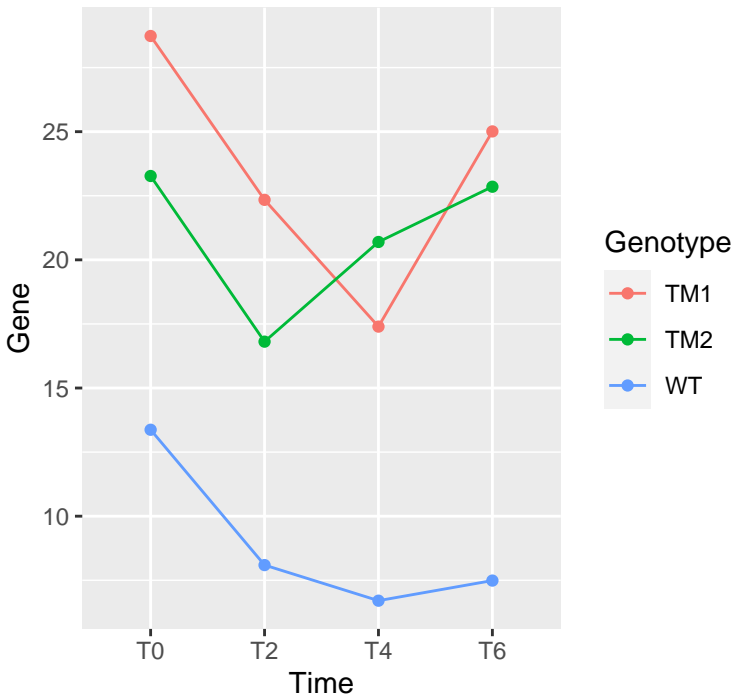

# AT4G16980

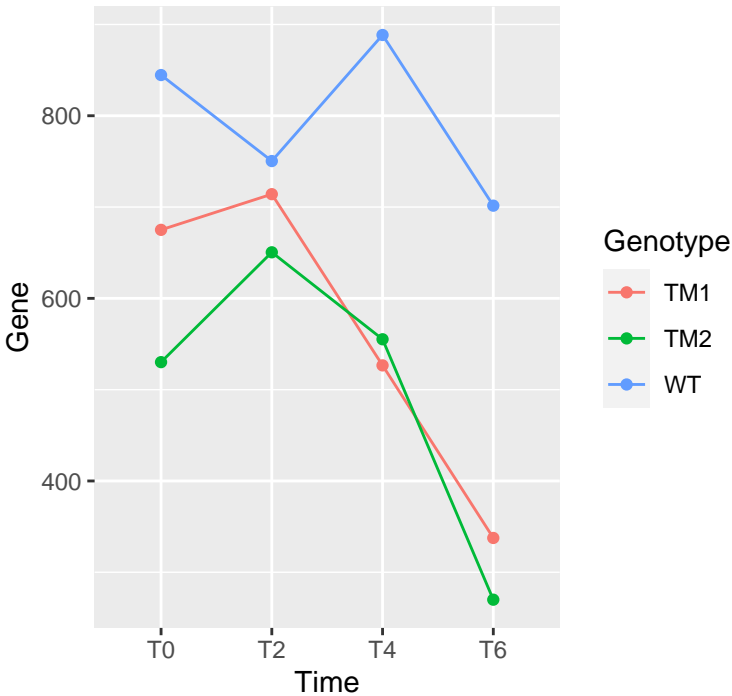

# AT4G18010

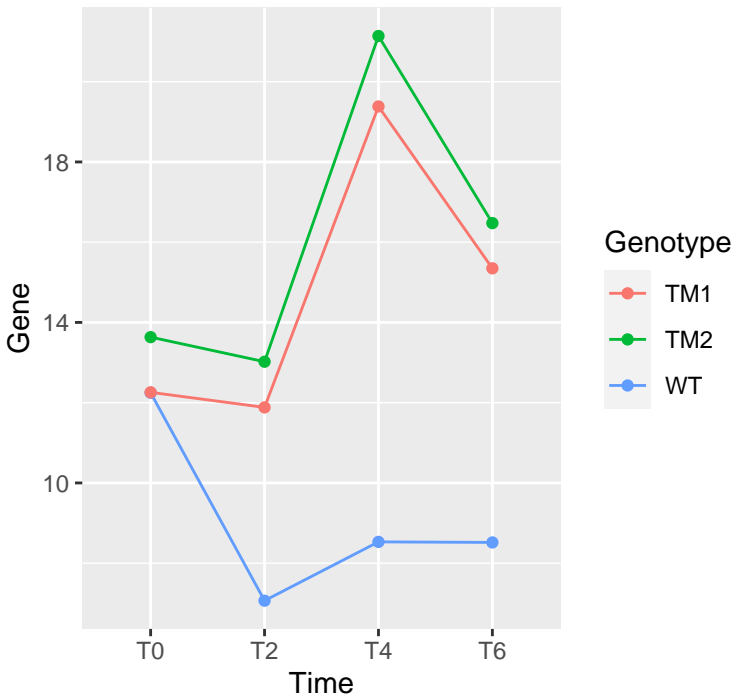

# AT4G18170

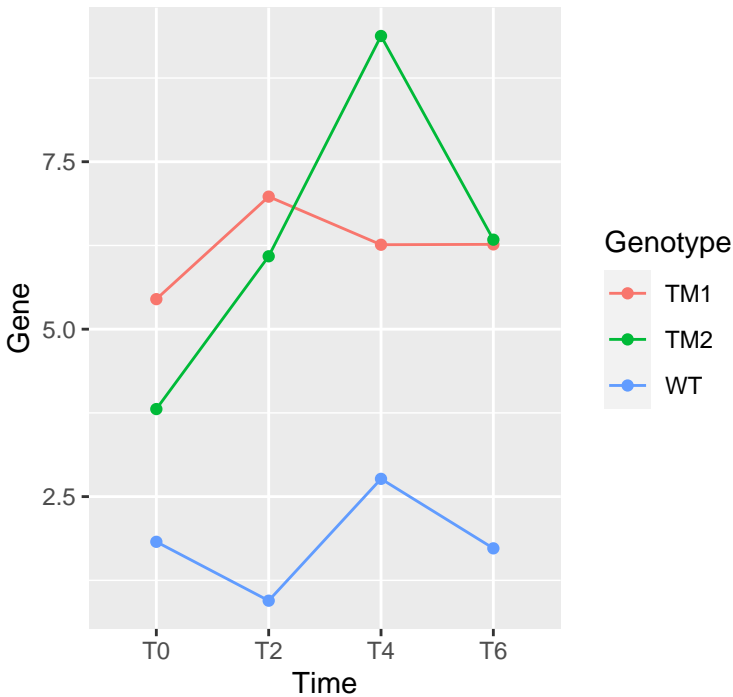

# AT4G18970

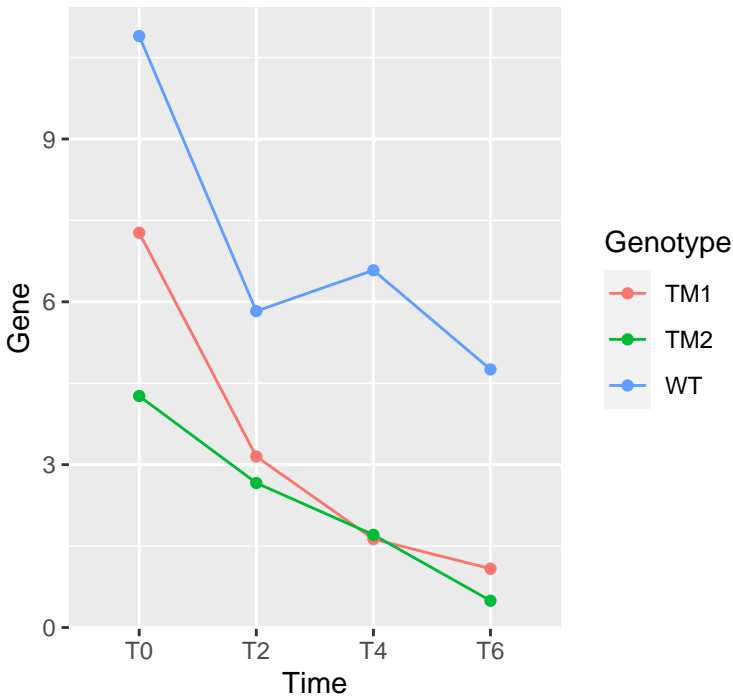

# AT4G19380

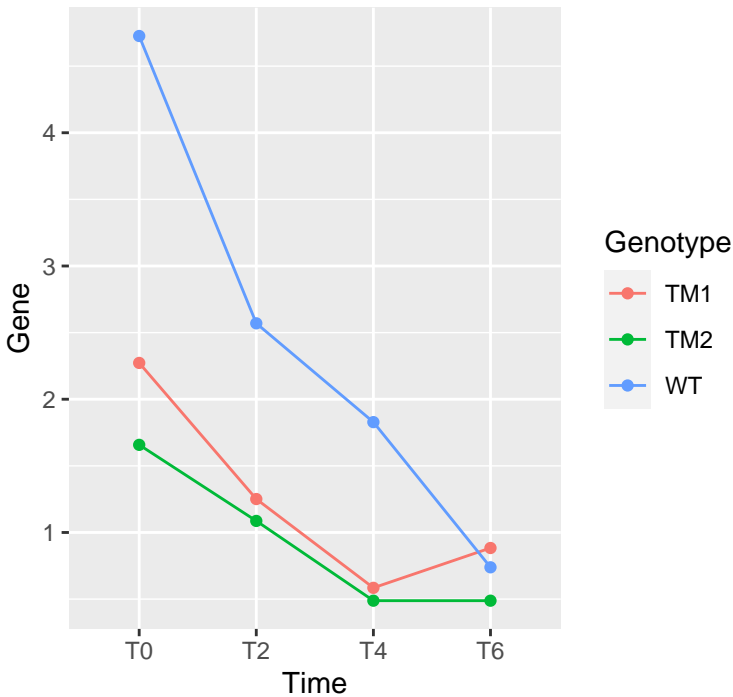

# AT4G19950

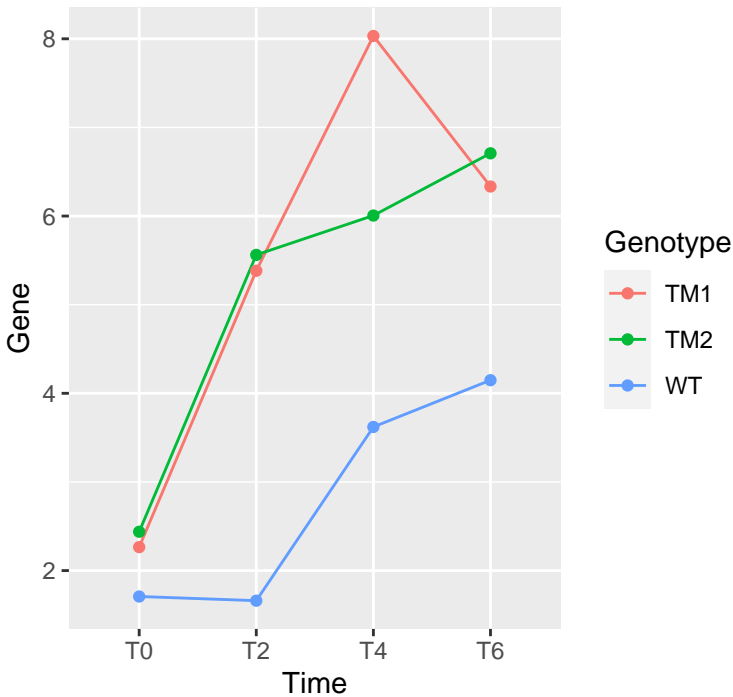



# AT4G20320

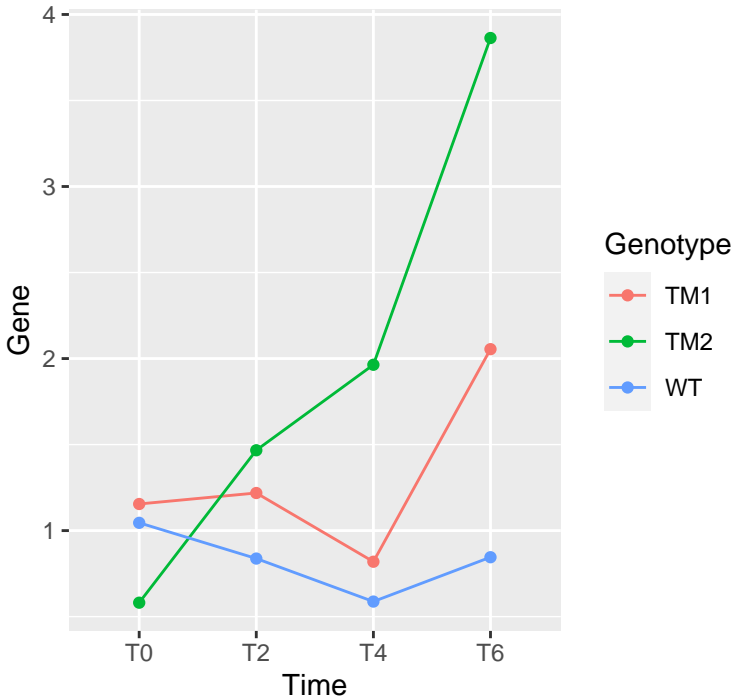

# AT4G23020

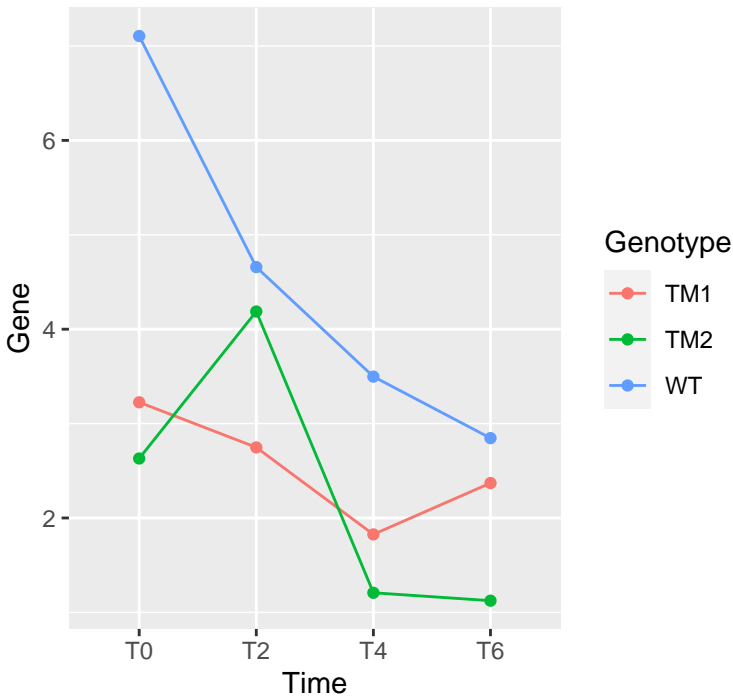

# AT4G23140

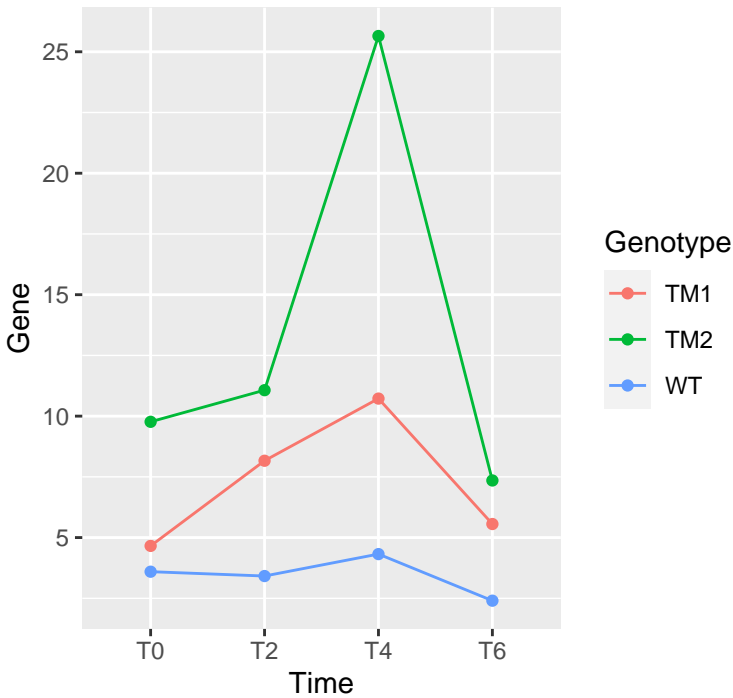

# AT4G23430

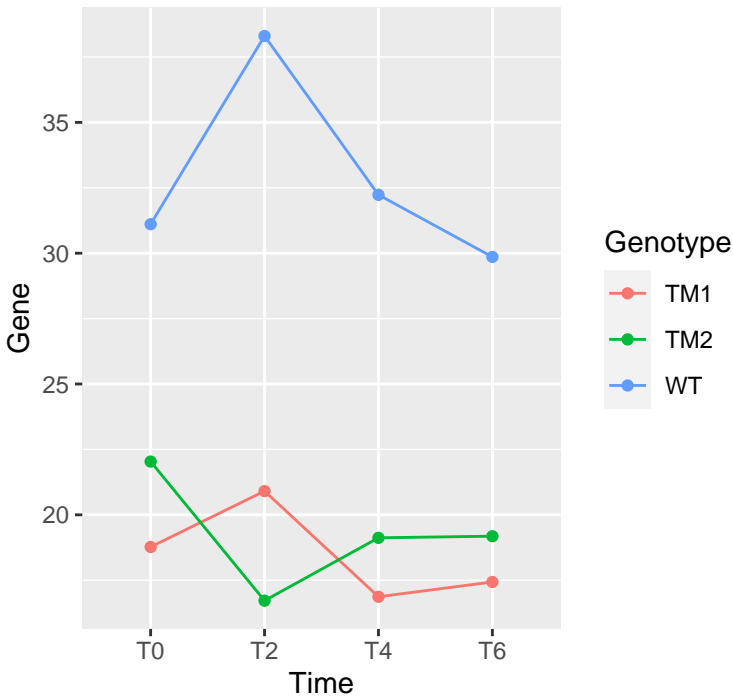

# AT4G23680

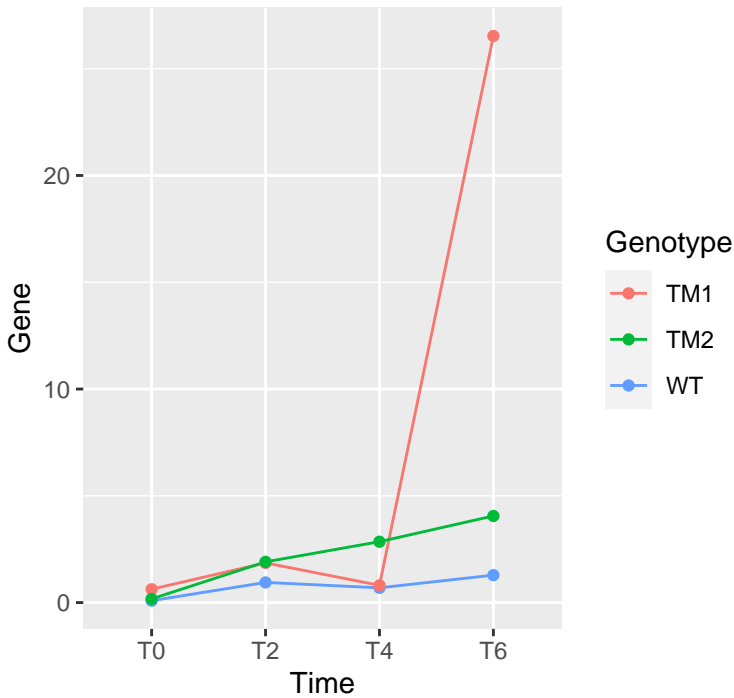

# AT4G23750

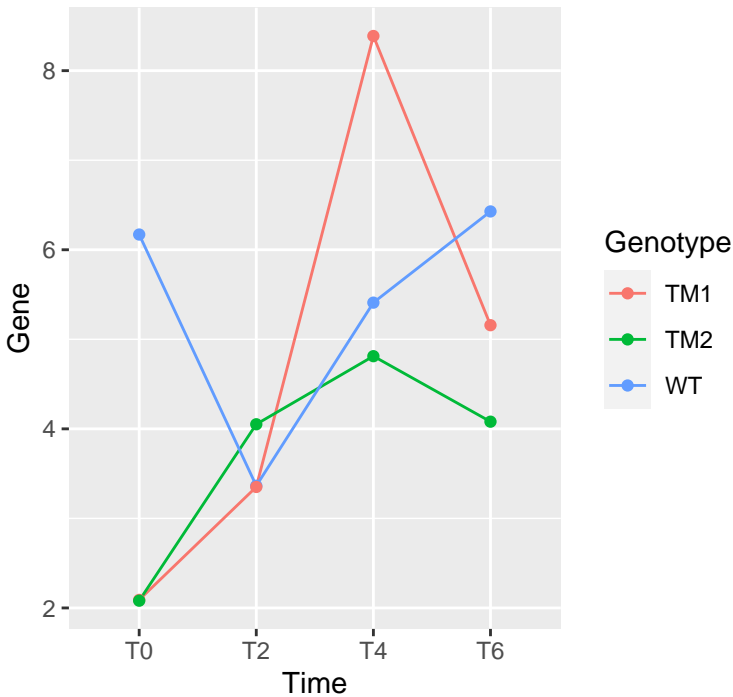

# AT4G24040

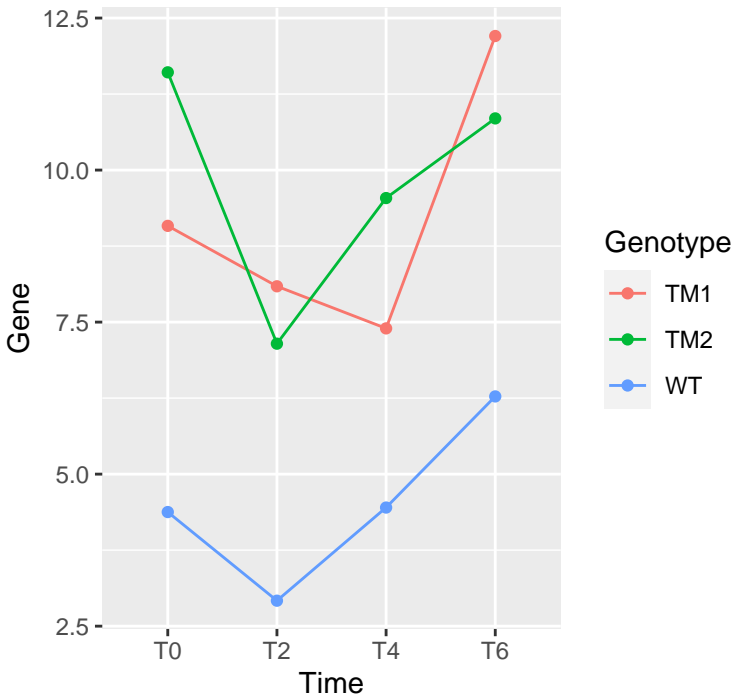

# AT4G26060

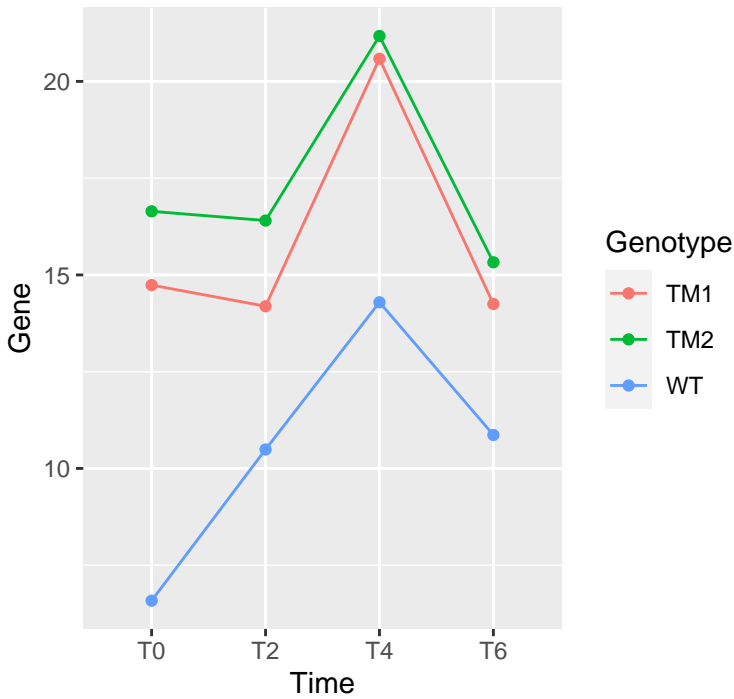



# AT4G27410

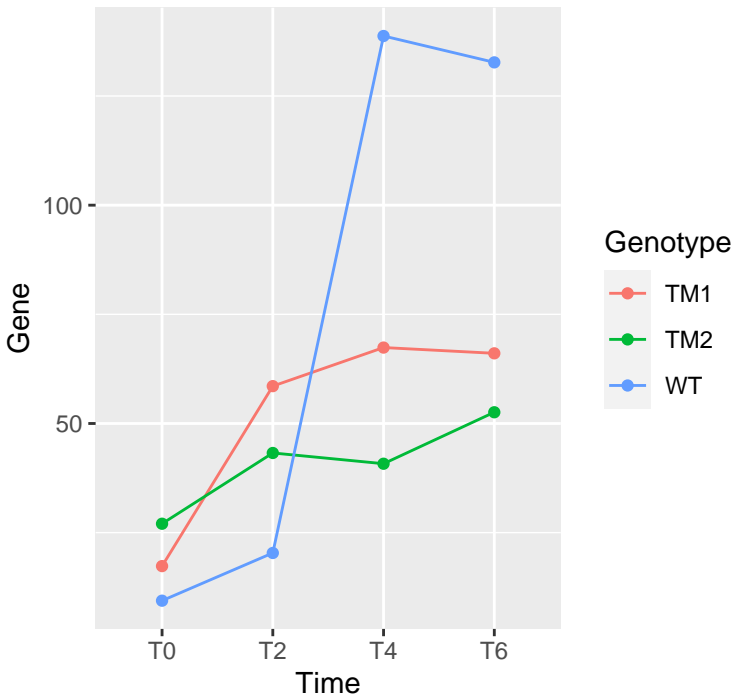

# AT4G27440

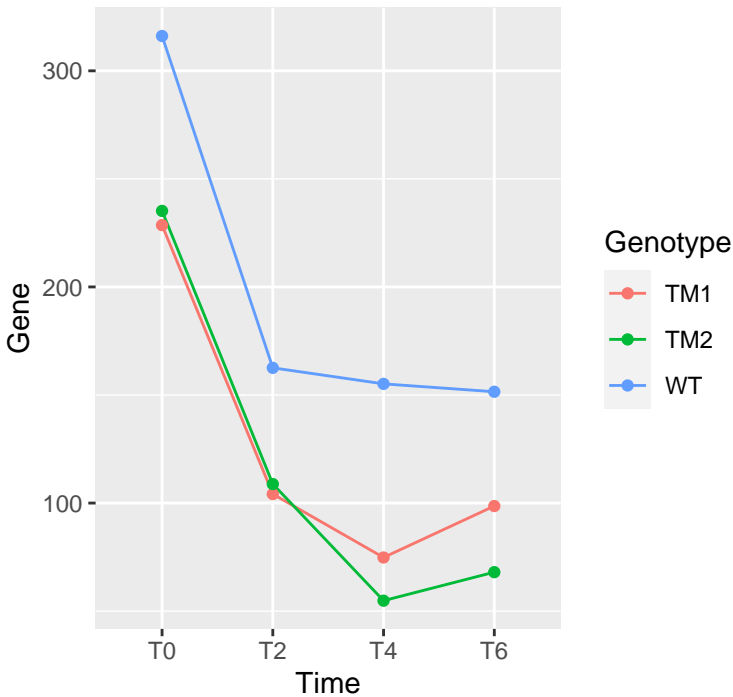

# AT4G28140

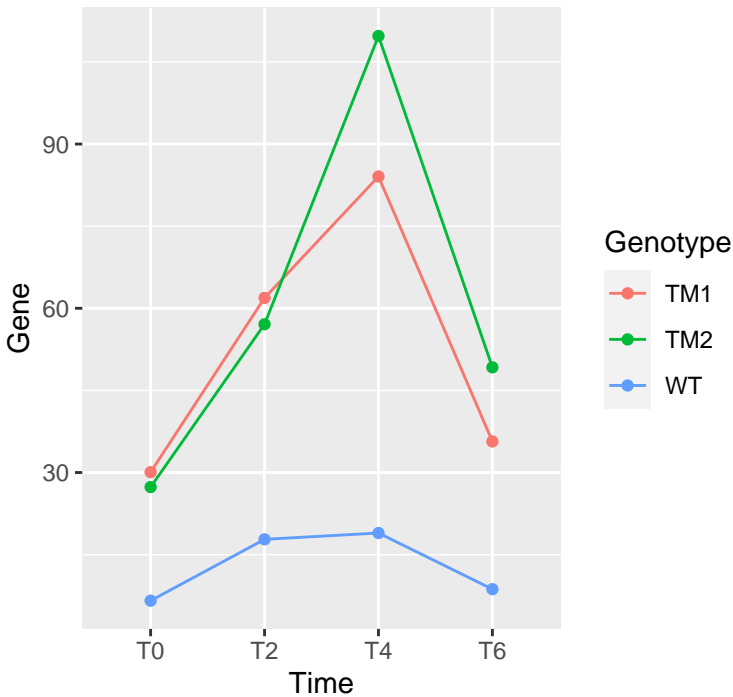

# AT4G28390

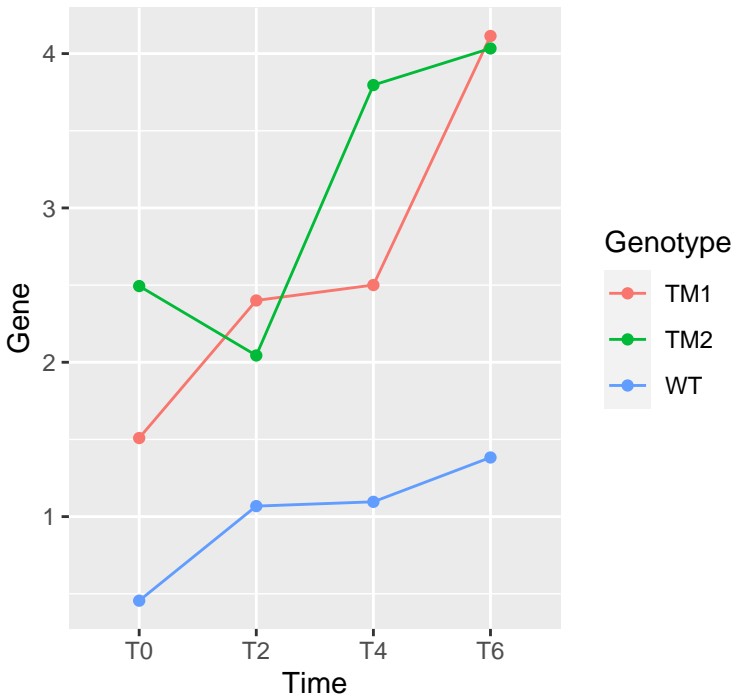

# AT4G28490

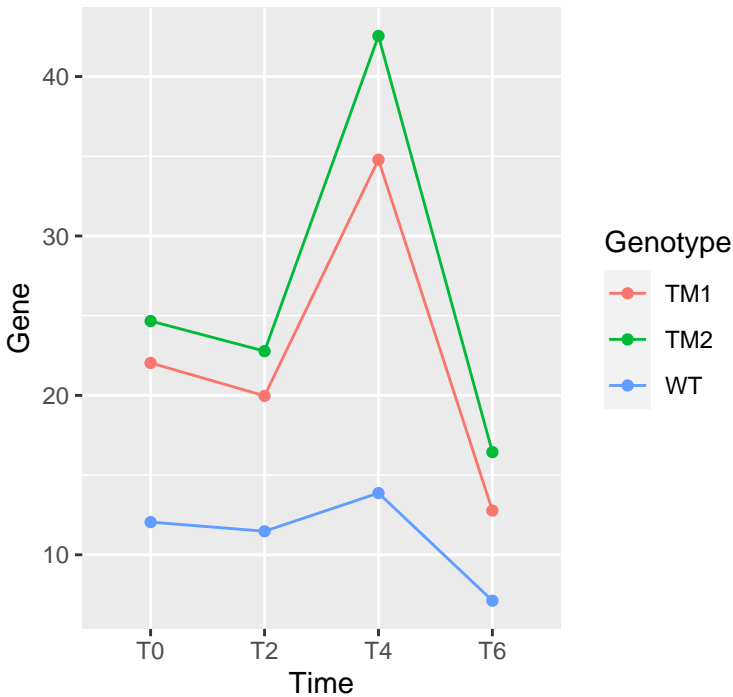

# AT4G30020

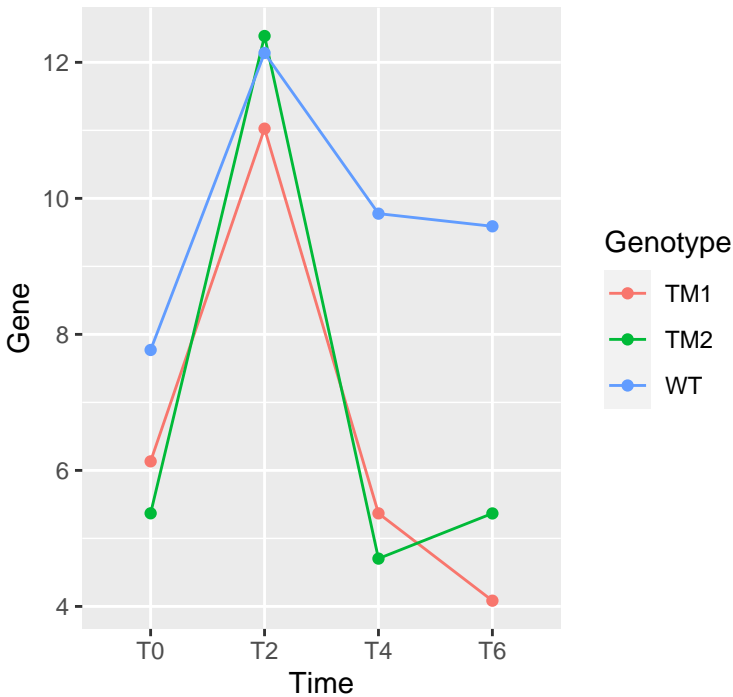

# AT4G30470

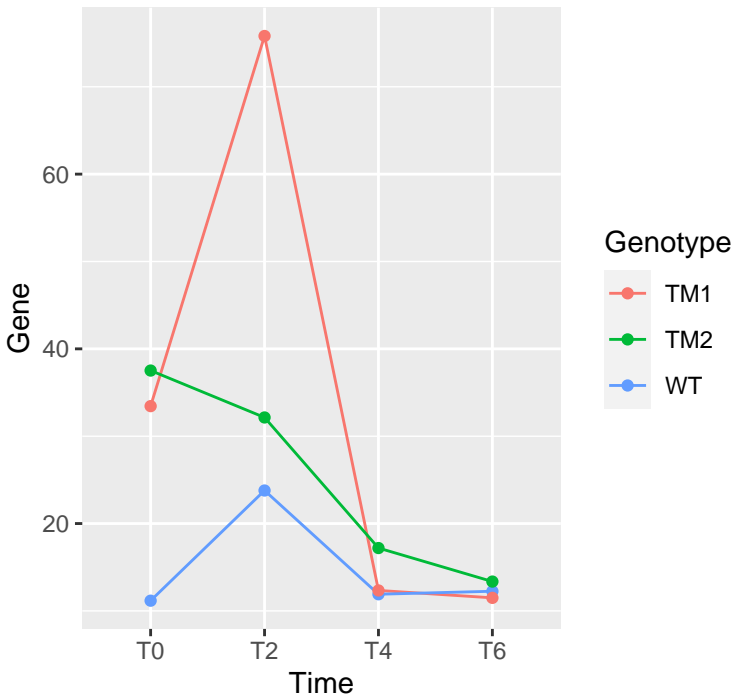

# AT4G30650

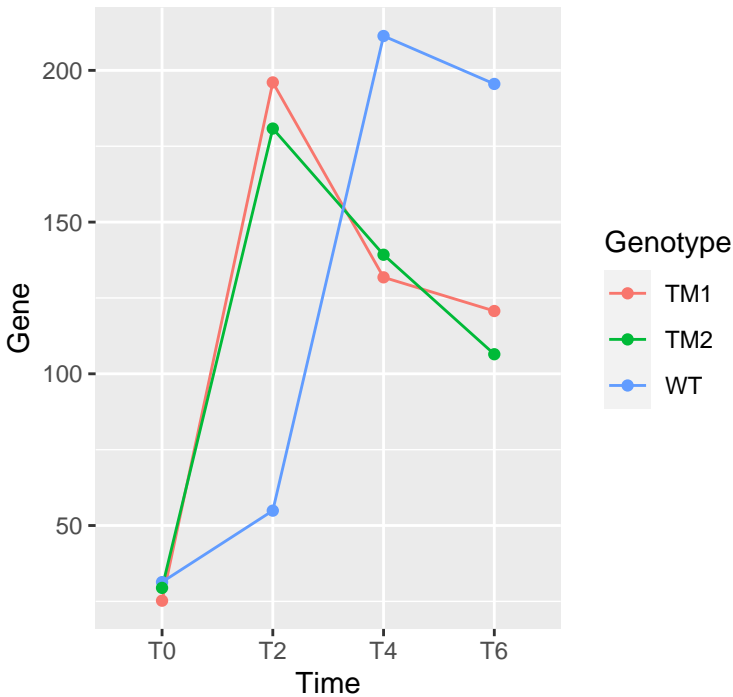



# AT4G31590

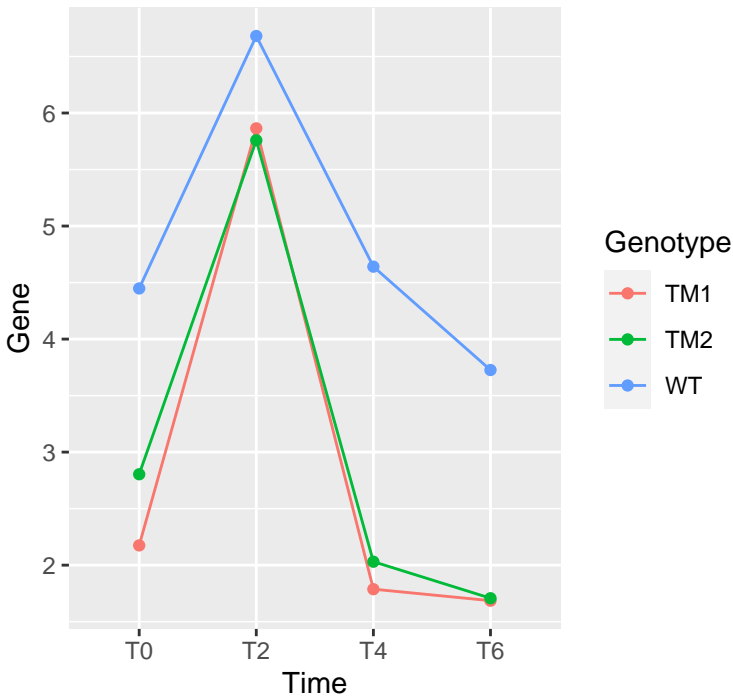

# AT4G31890

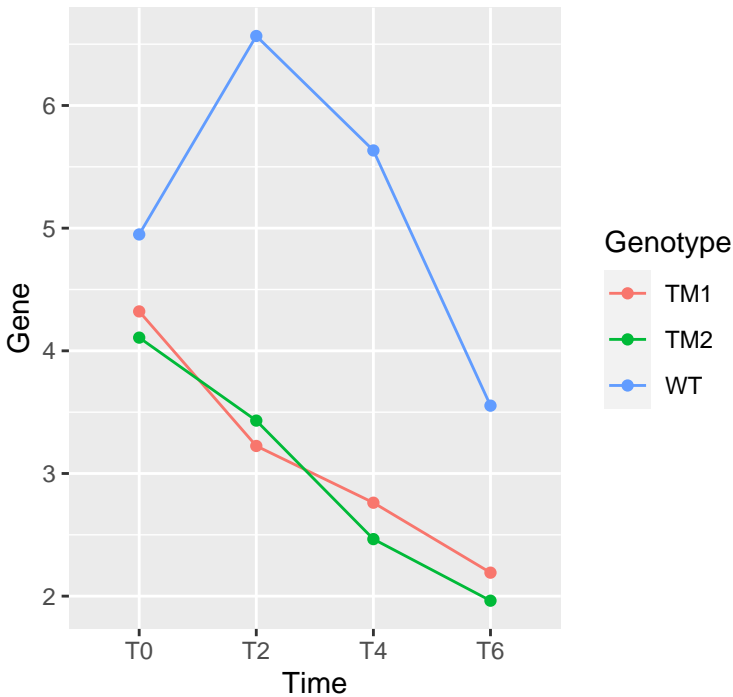

# AT4G32480

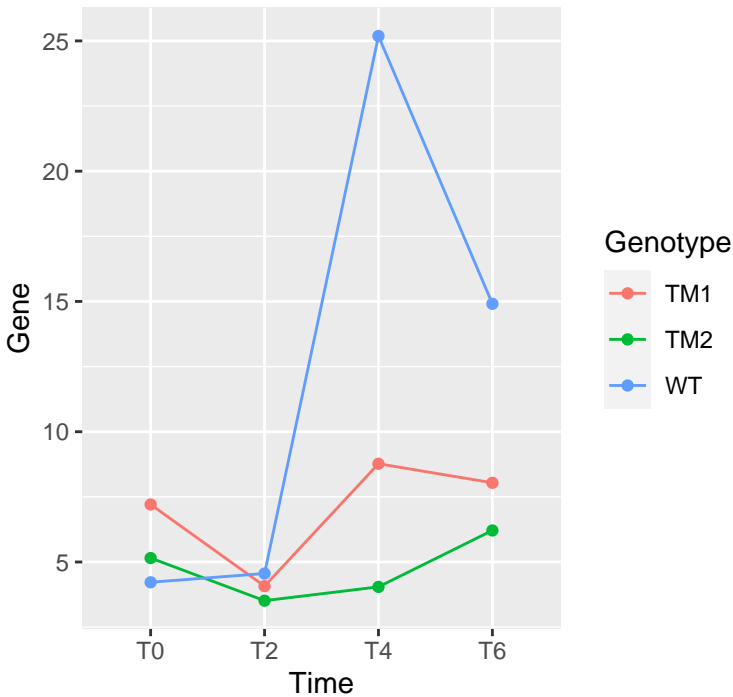

# AT4G32940

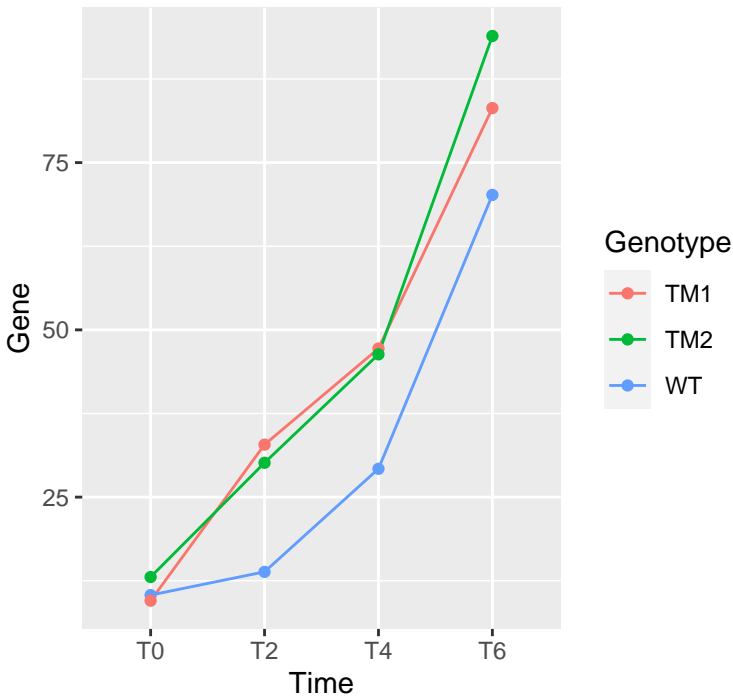

# AT4G33467

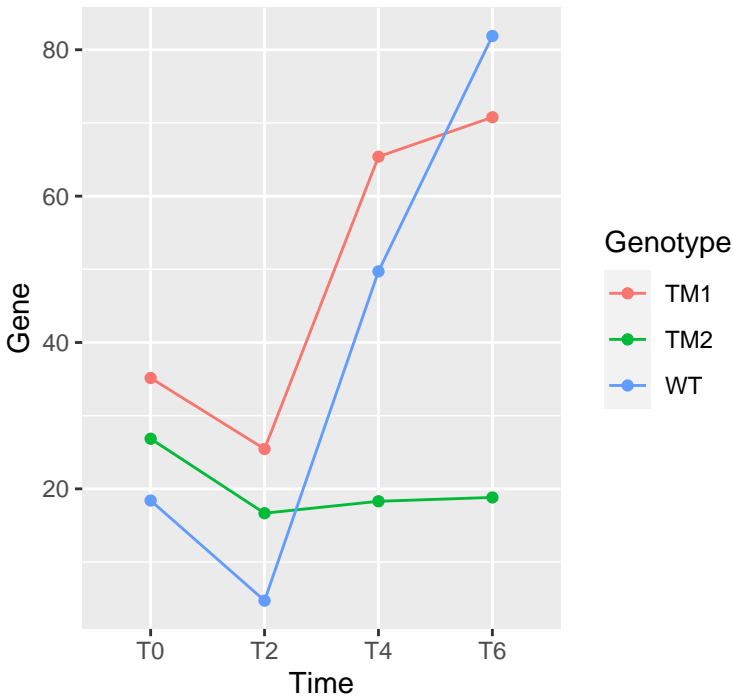

# AT4G34120

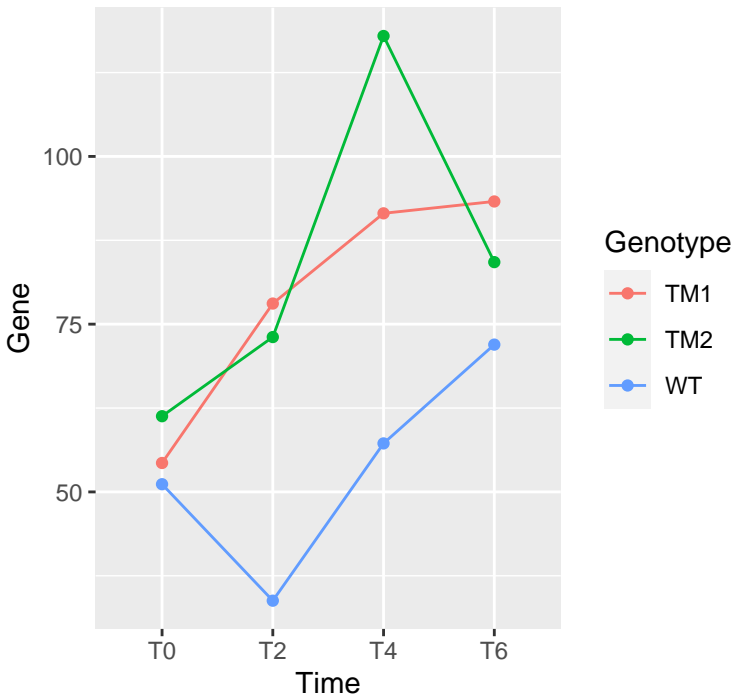

# AT4G34131

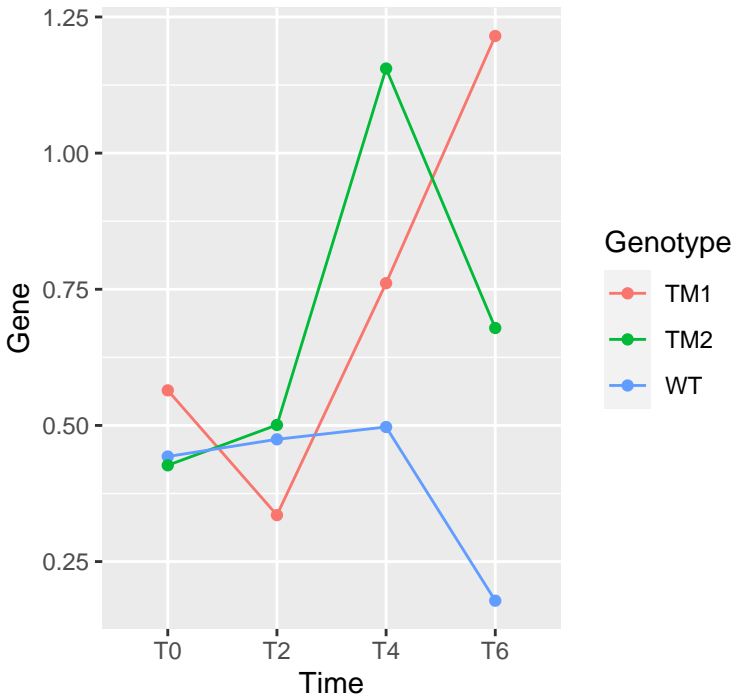

# AT4G34135

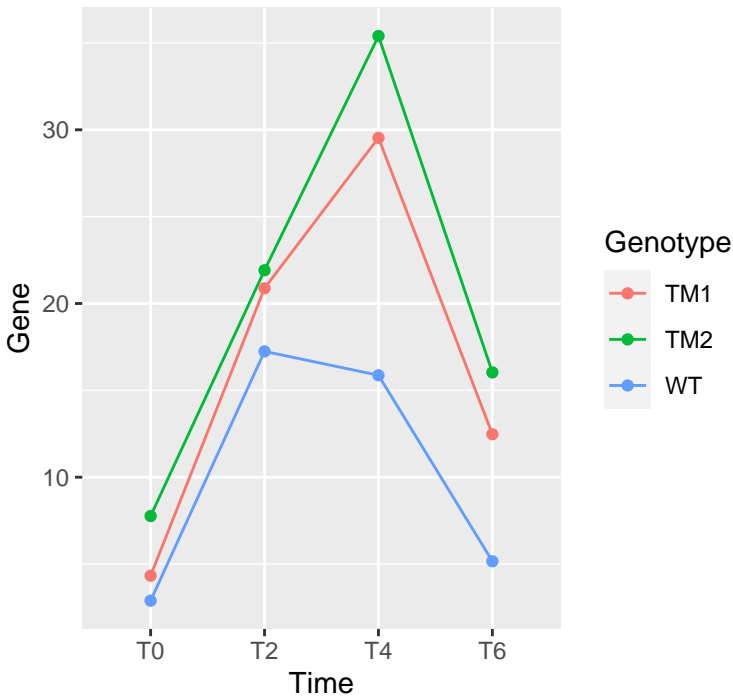



# AT4G34230

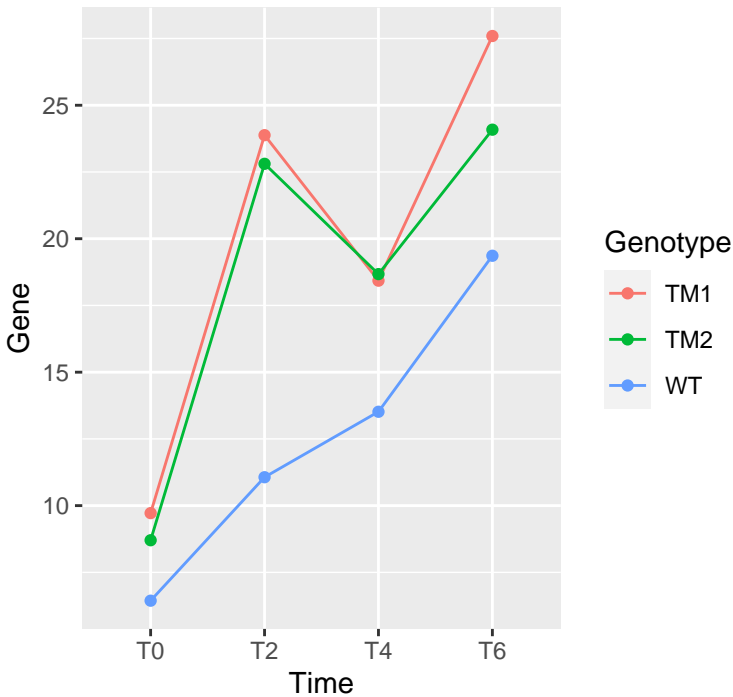

# AT4G34250

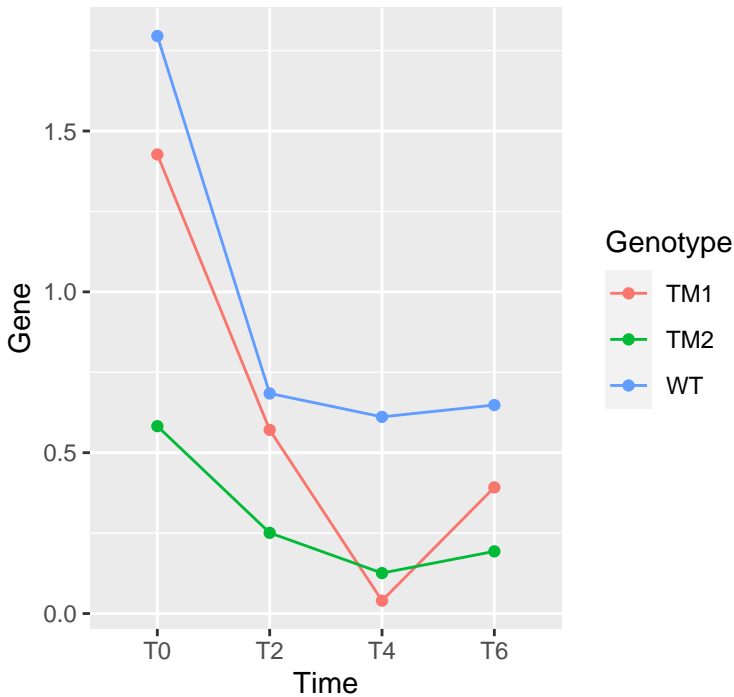

# AT4G34710

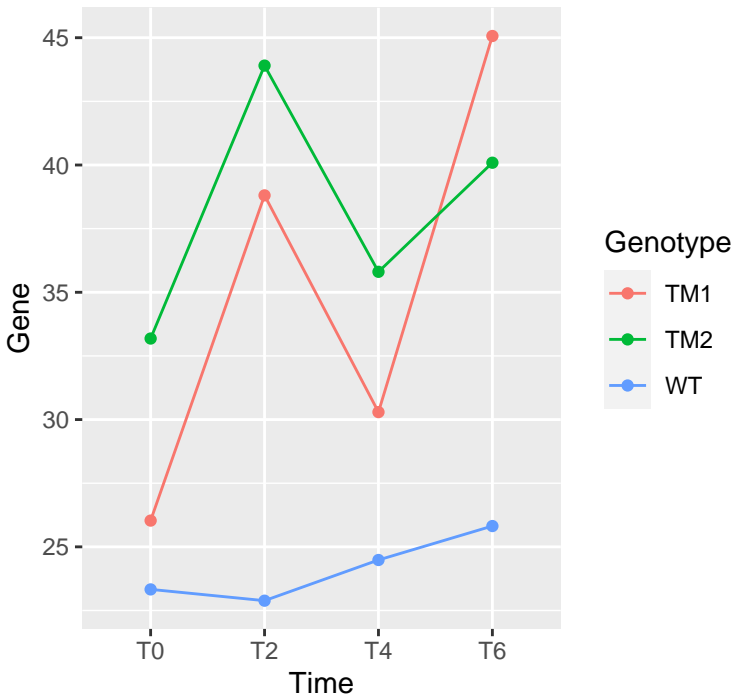

# AT4G34760

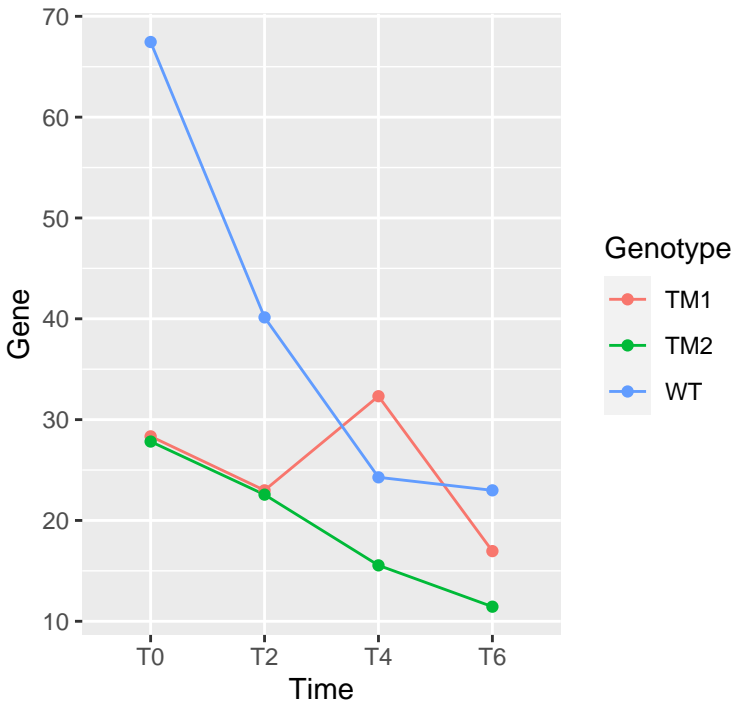

# AT4G34830

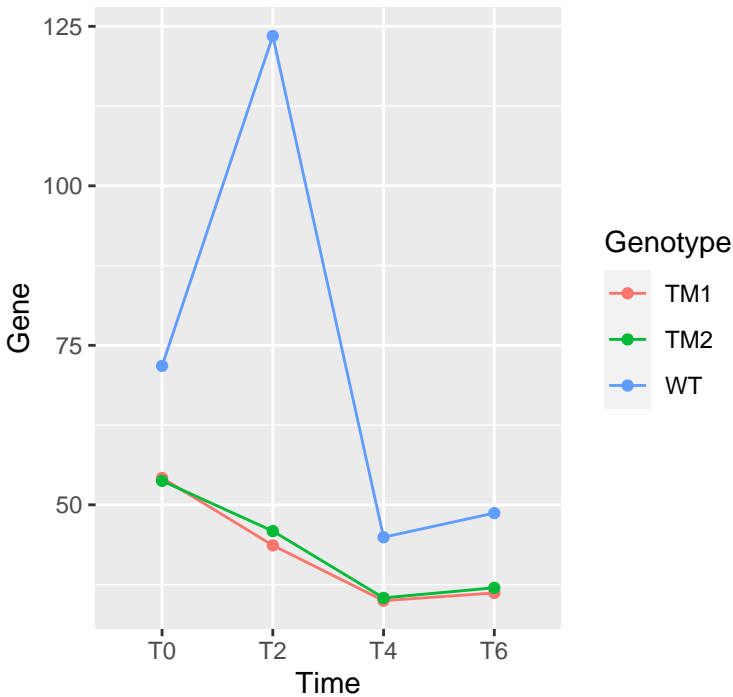

# AT4G35100

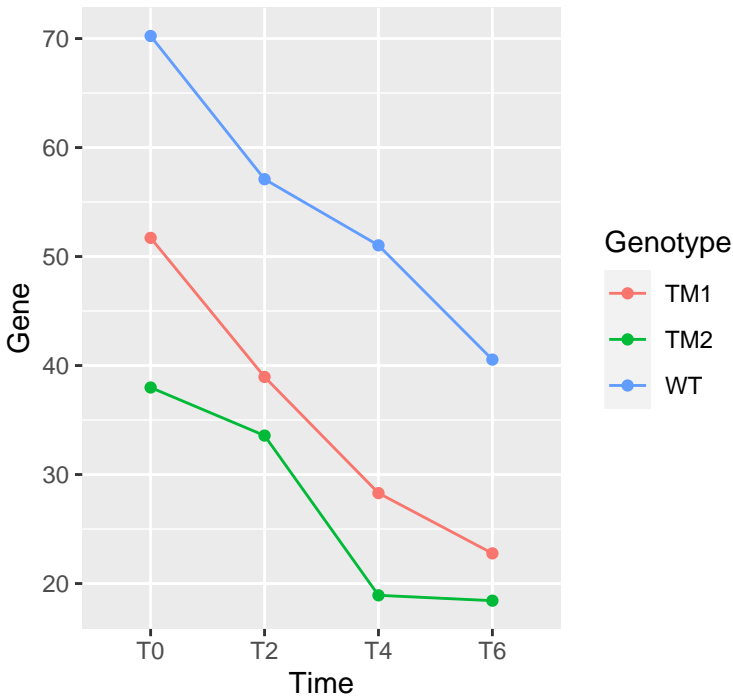

# AT4G35770

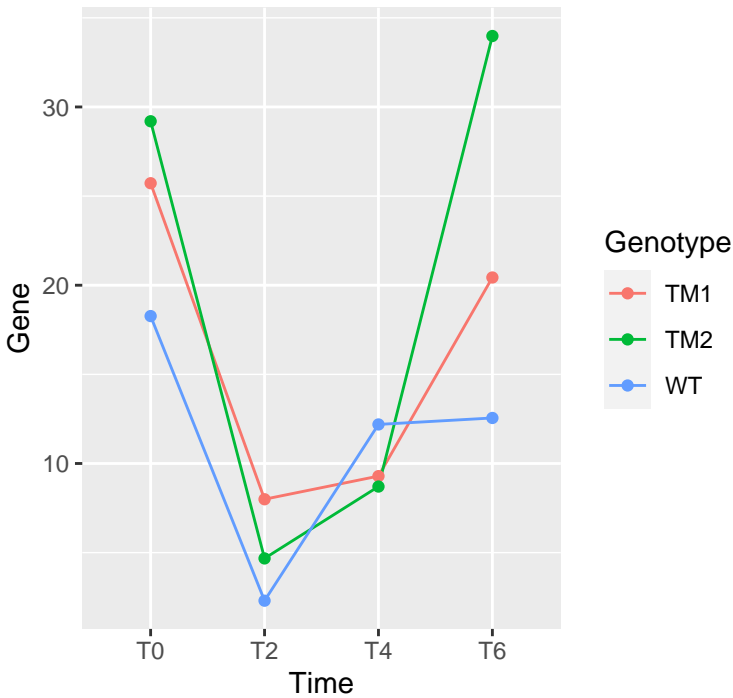

# AT4G36010

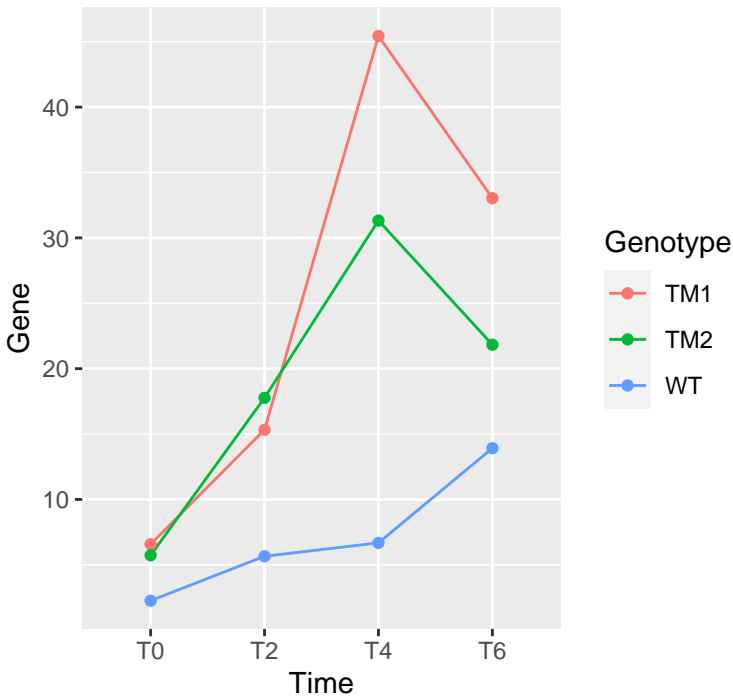



# AT4G37080

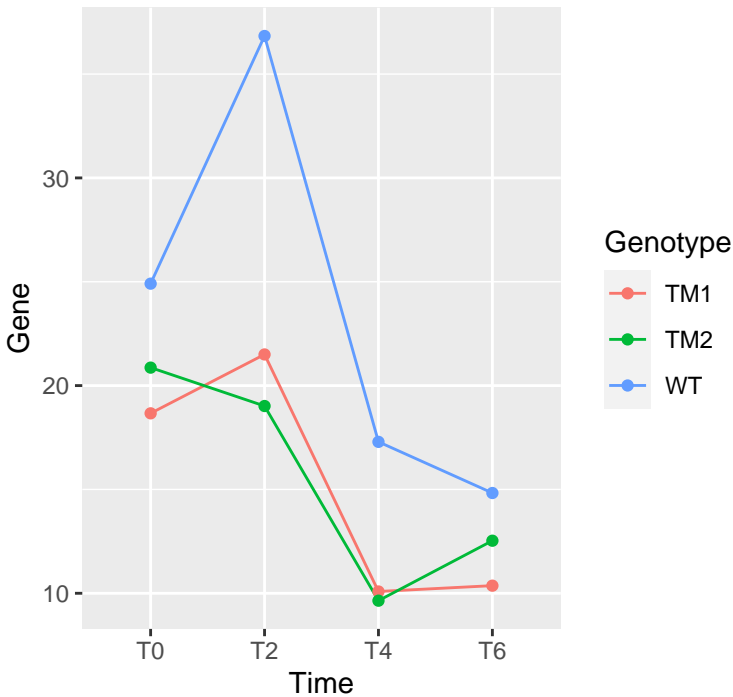

# AT4G37750

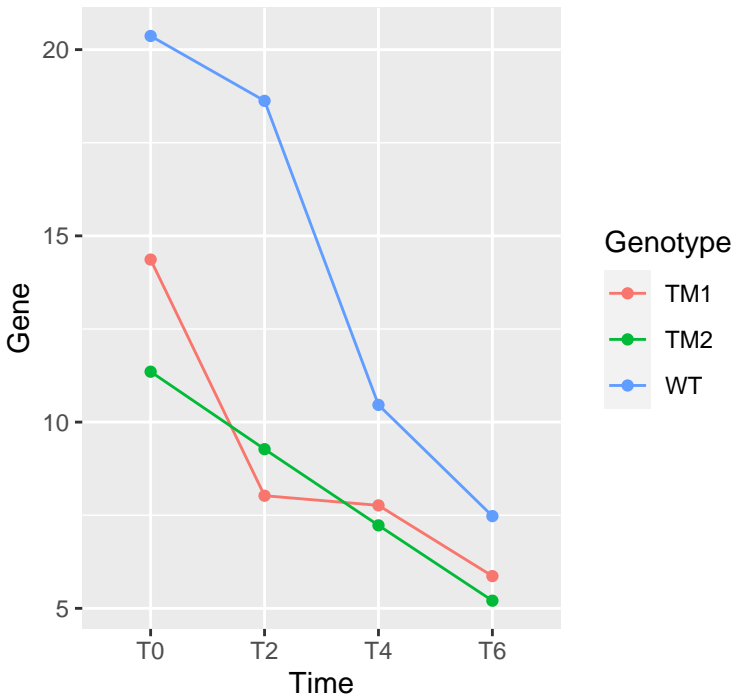

# AT4G38340

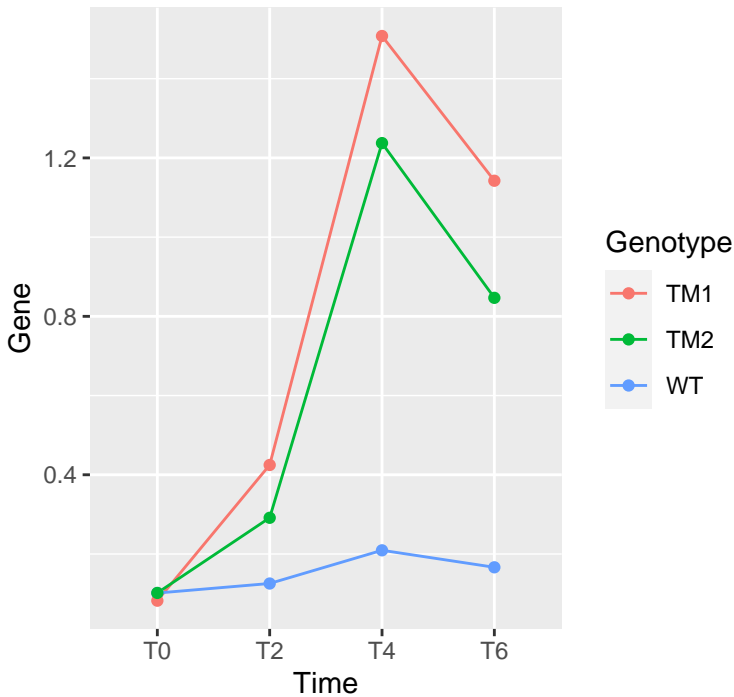

# AT4G38770

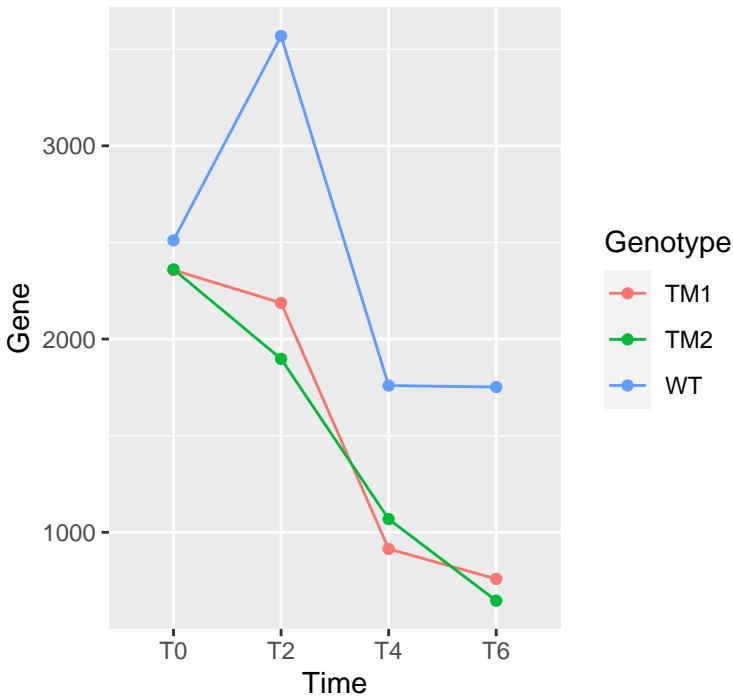

# AT4G39330

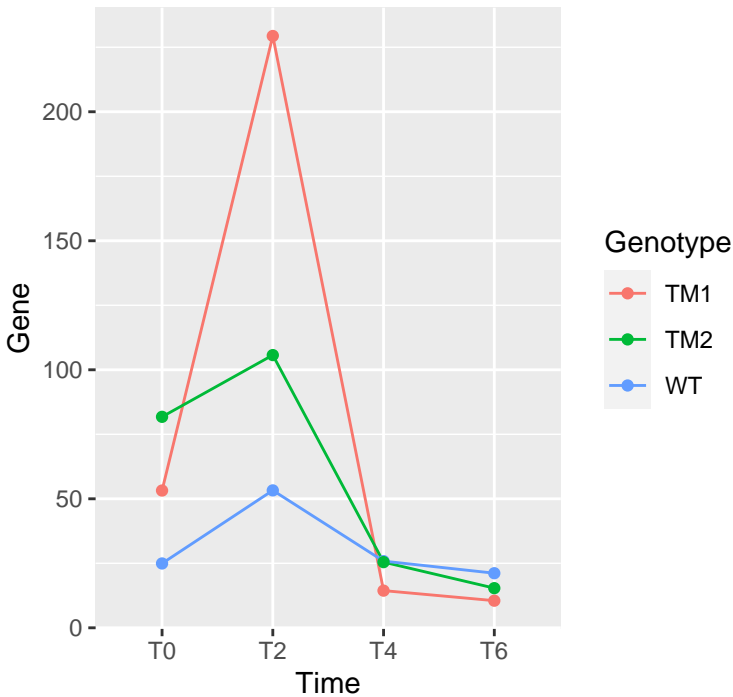

# AT5G01015

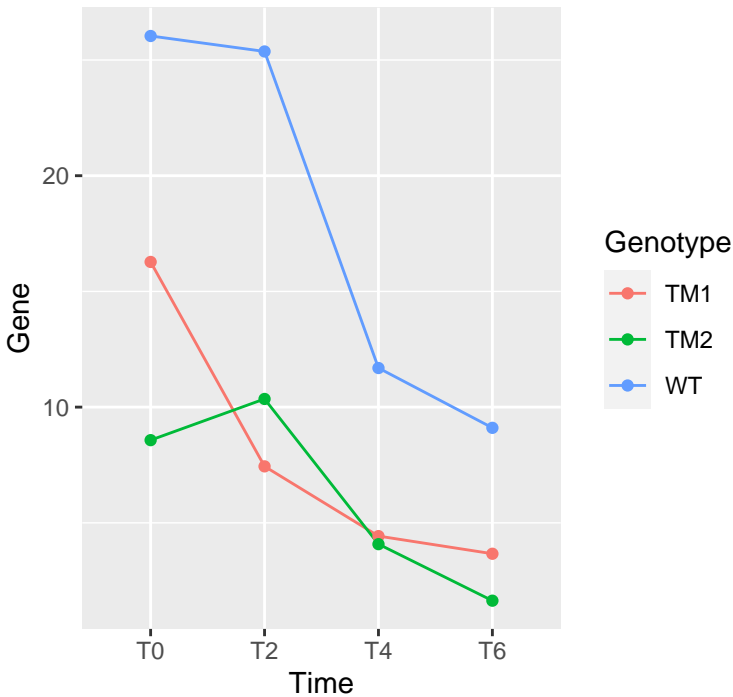

# AT5G01075

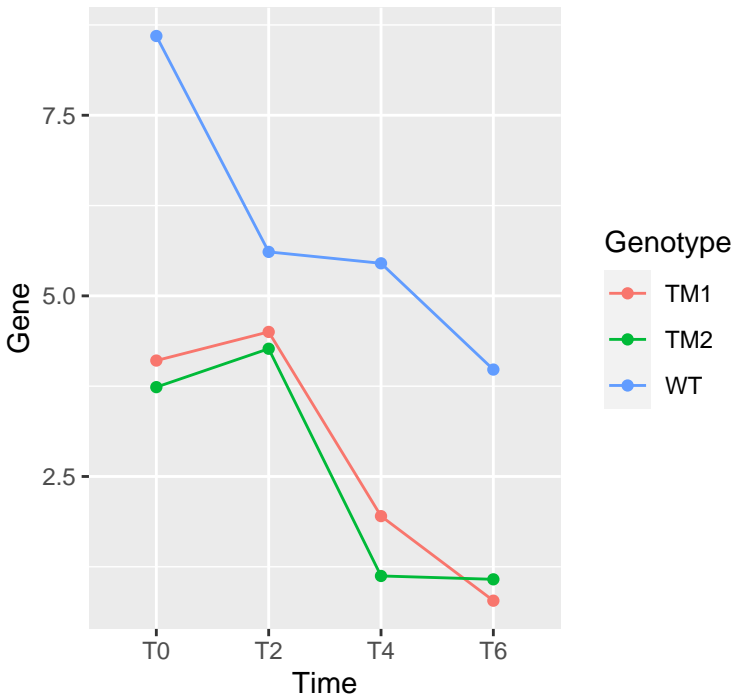

# AT5G01550

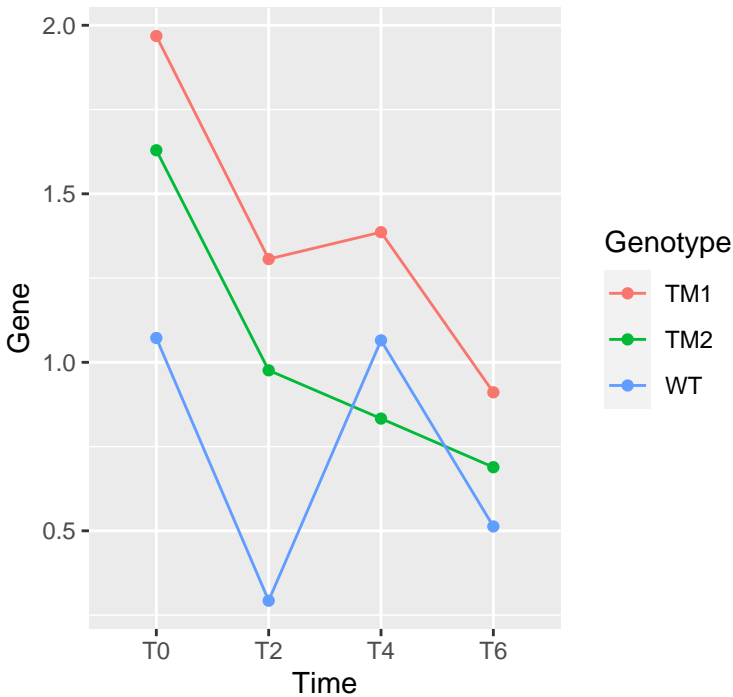



# AT5G01790

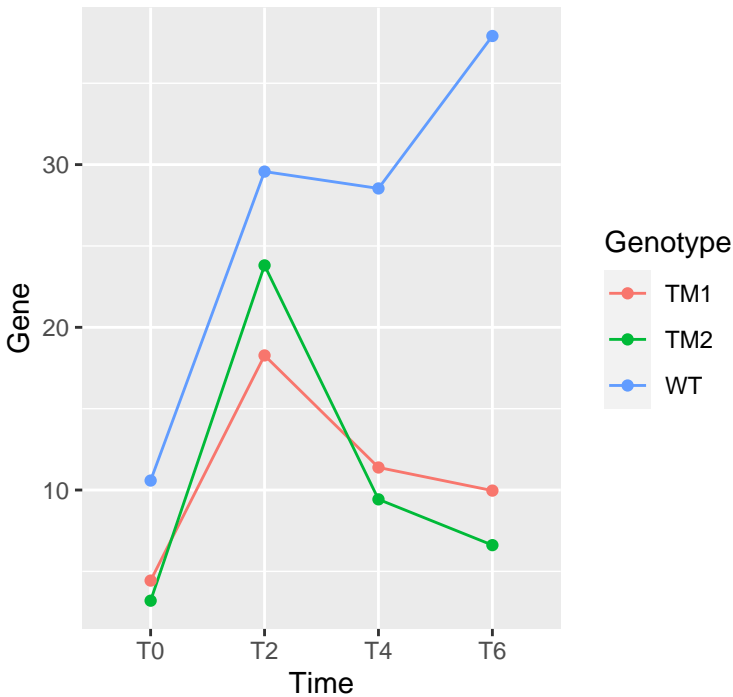

# AT5G01800

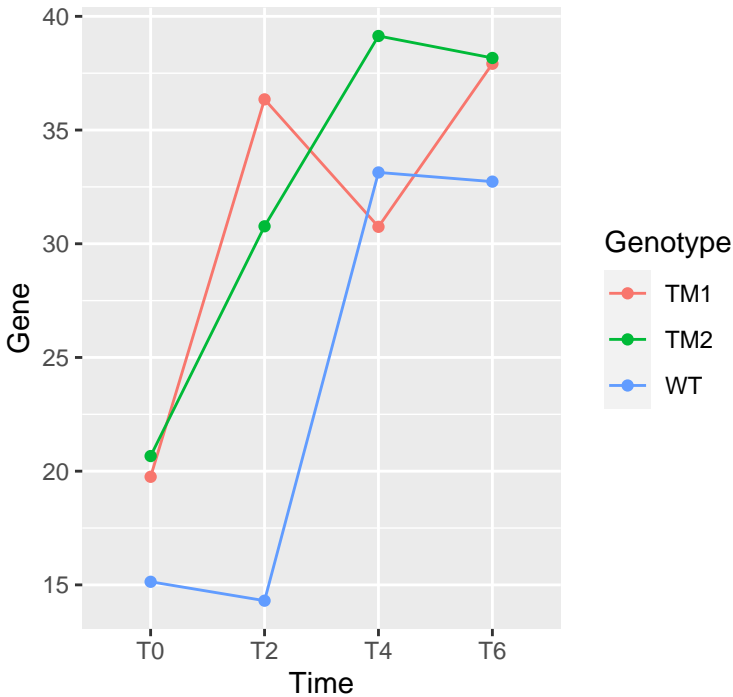

# AT5G02020

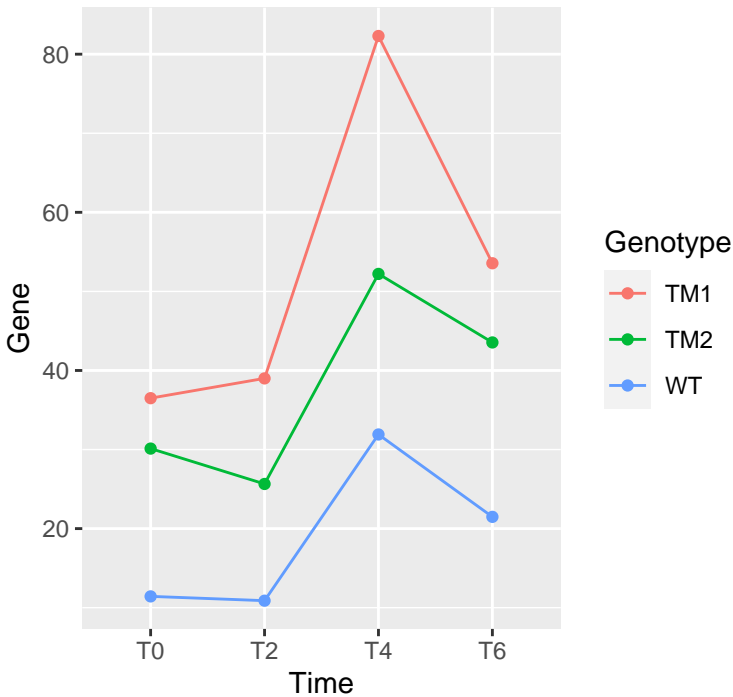

# AT5G02190

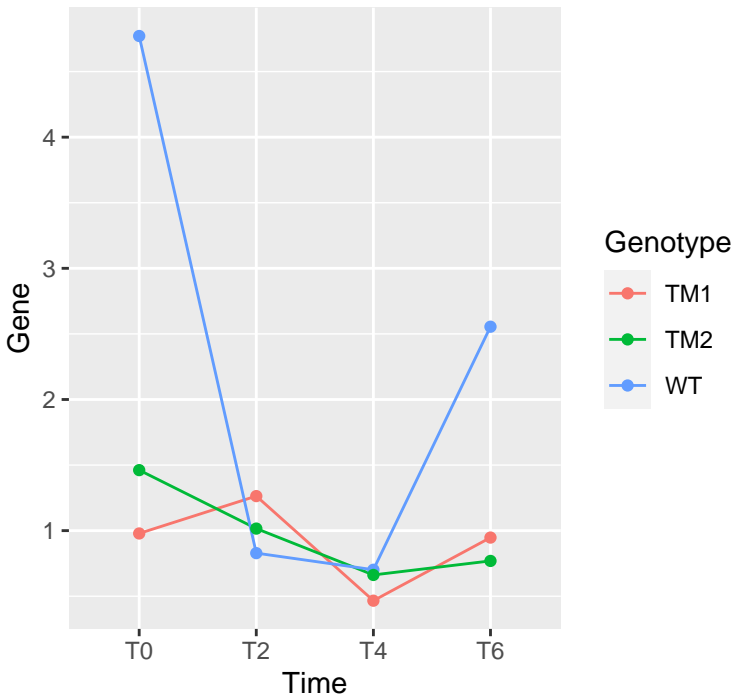

# AT5G02540

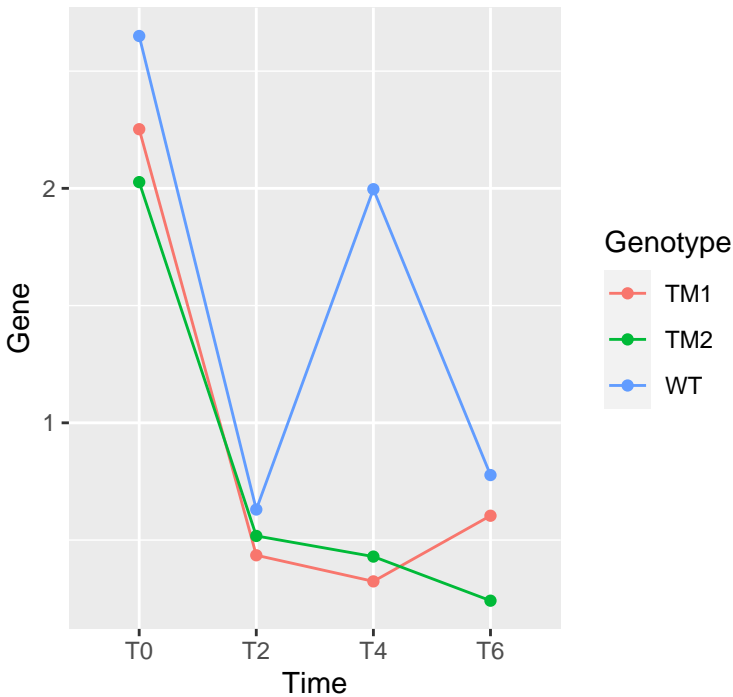

# AT5G02760

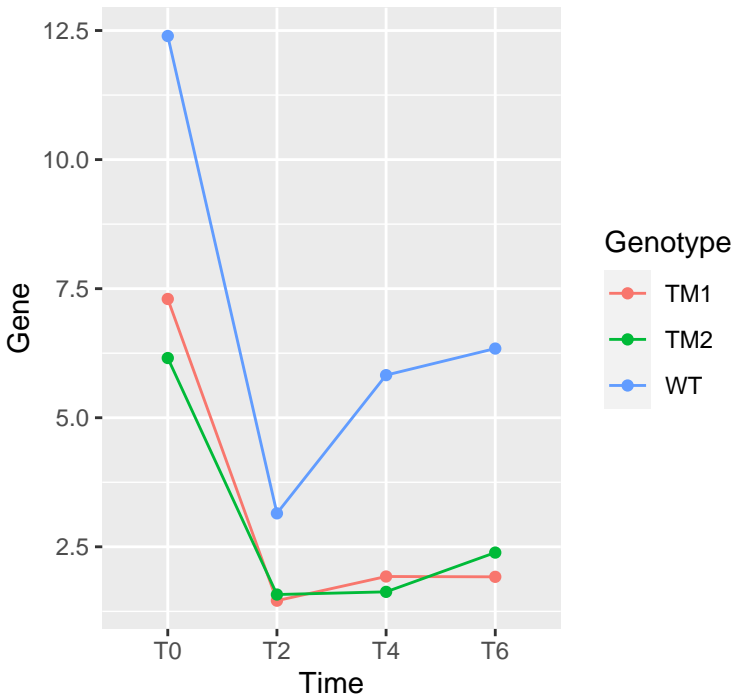

# AT5G03230

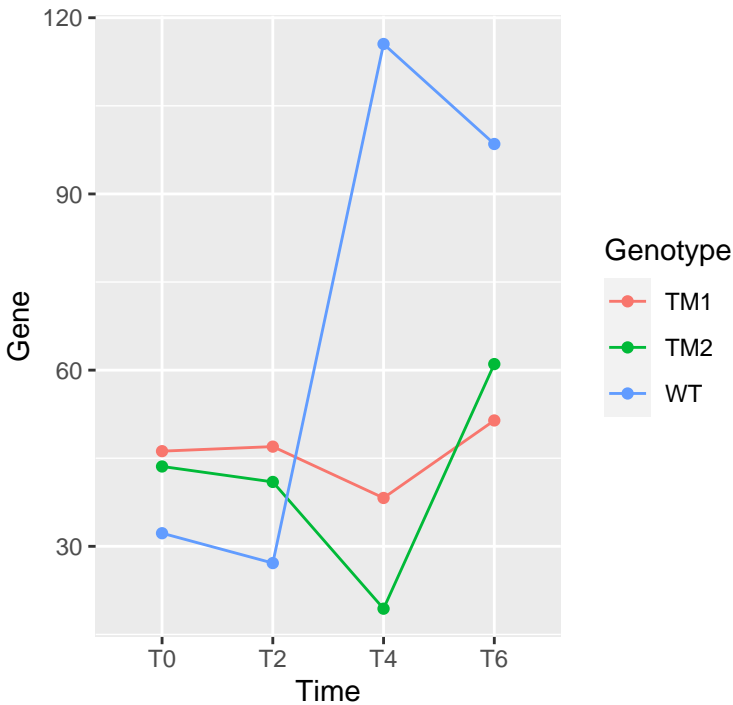

# AT5G04340

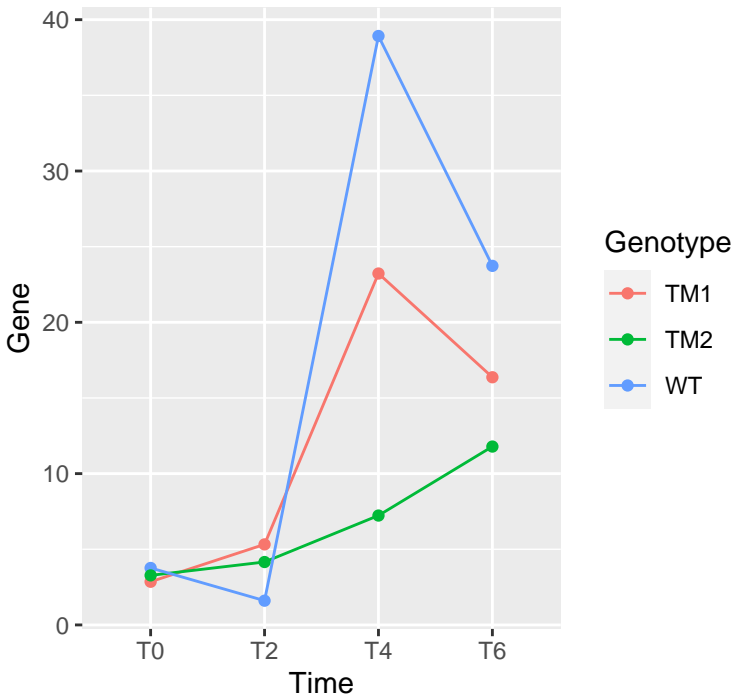



# AT5G04850

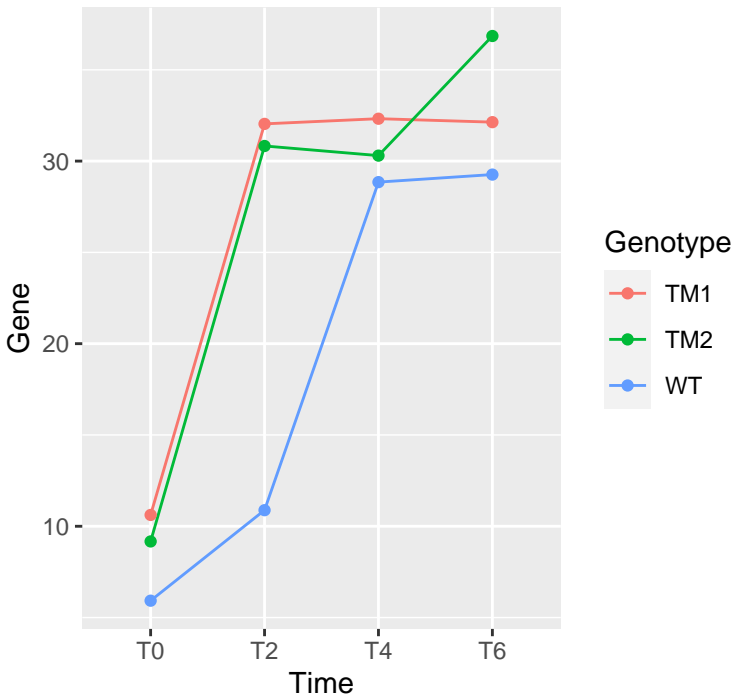

# AT5G04950

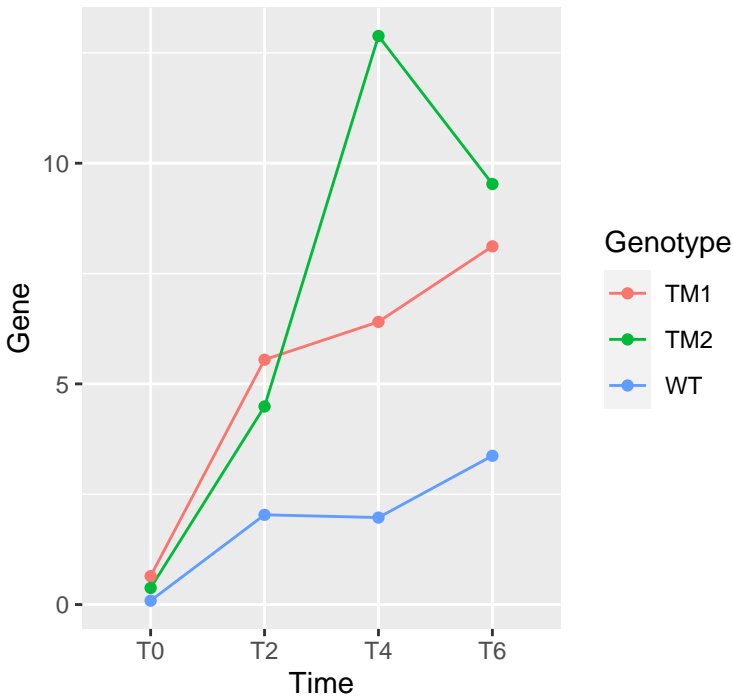

# AT5G06530

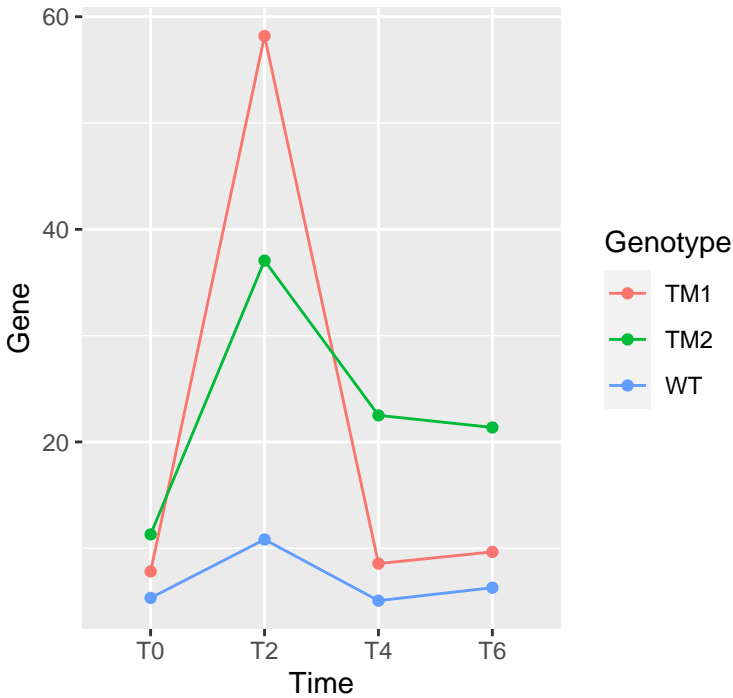

# AT5G07030

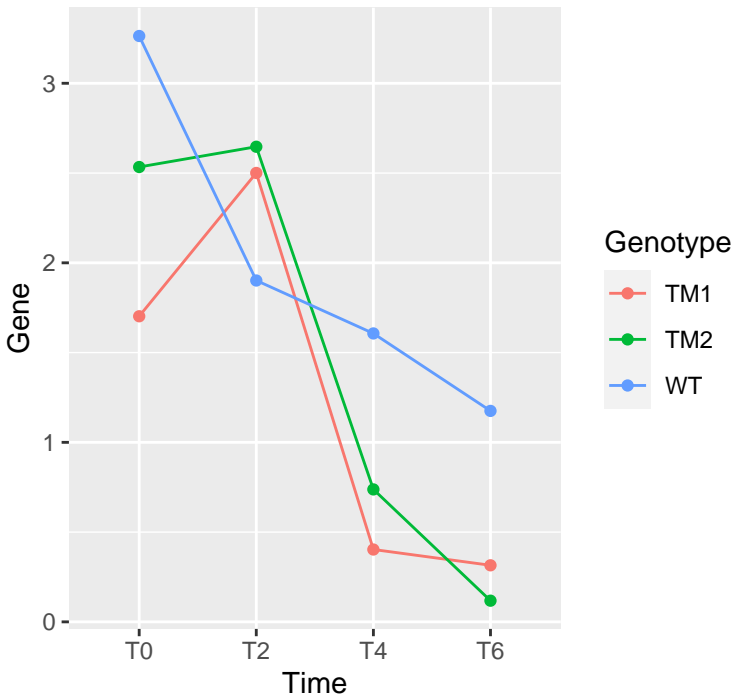

# AT5G07100

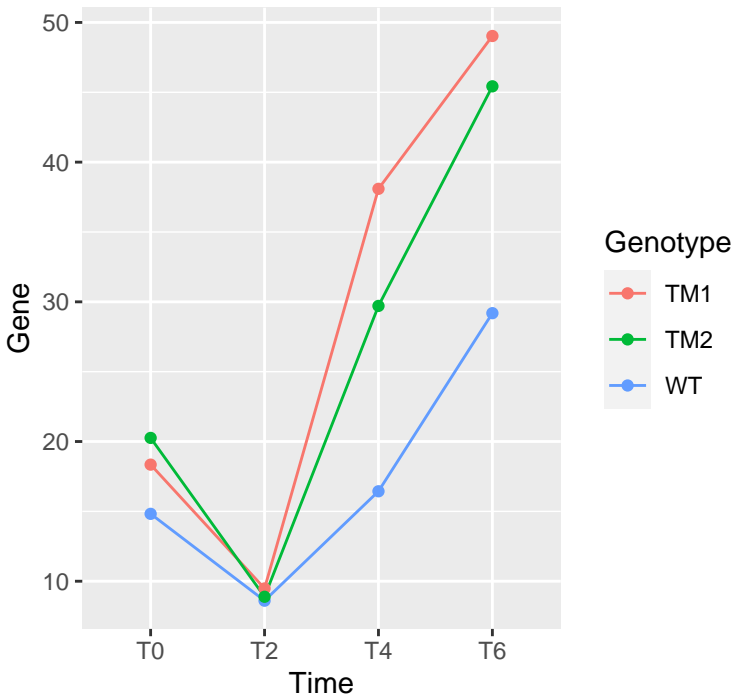

# AT5G09220

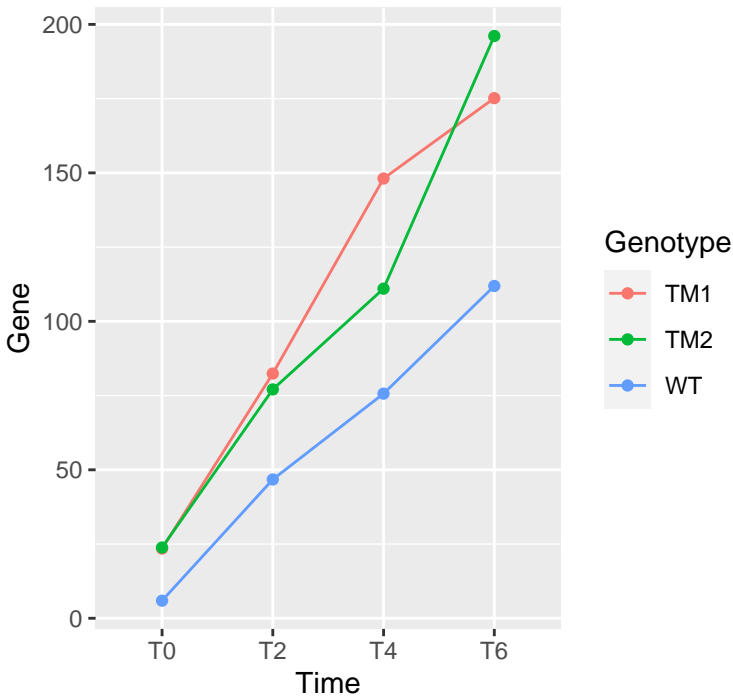

# AT5G09440

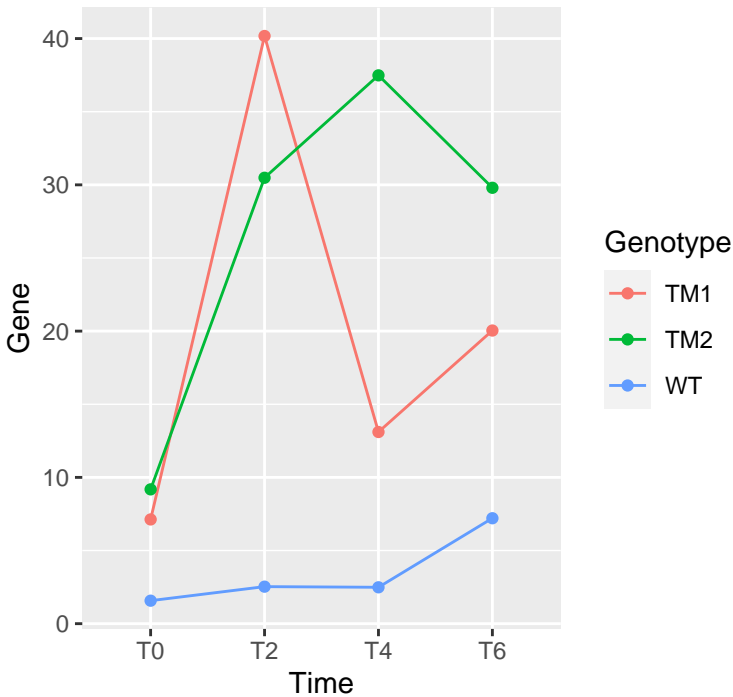

# AT5G10930

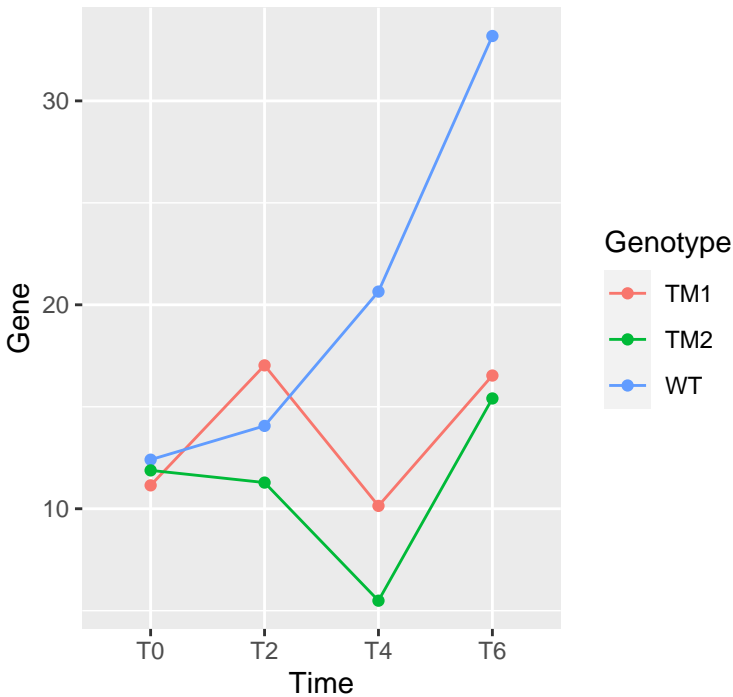



# AT5G11970

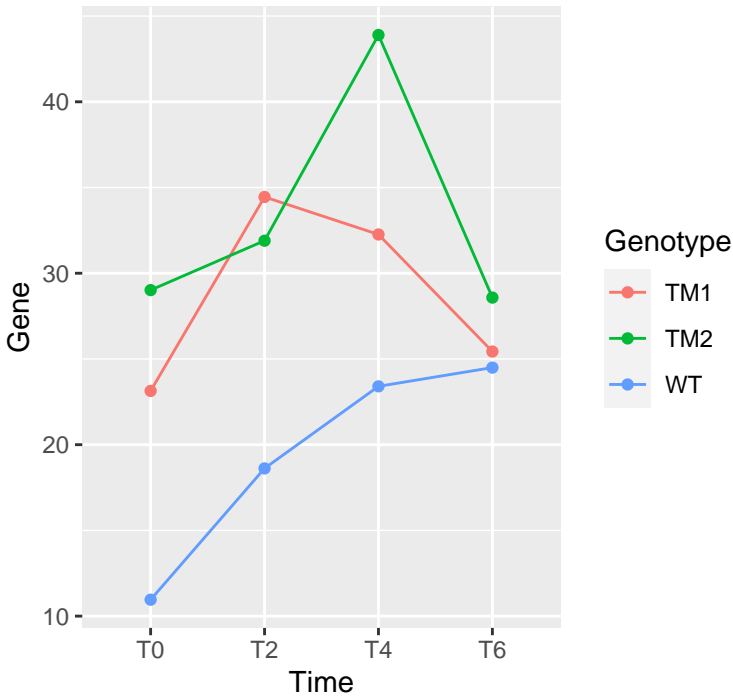

# AT5G12940

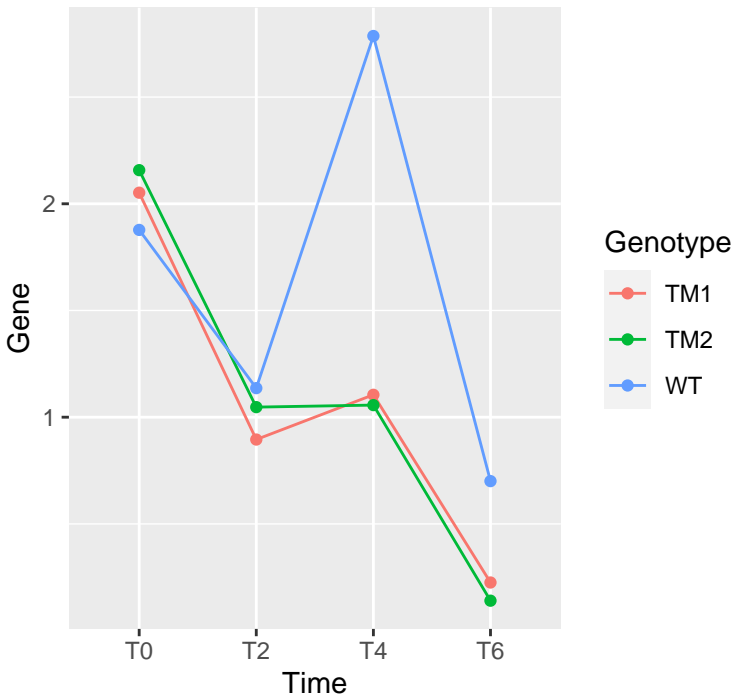

# AT5G13460

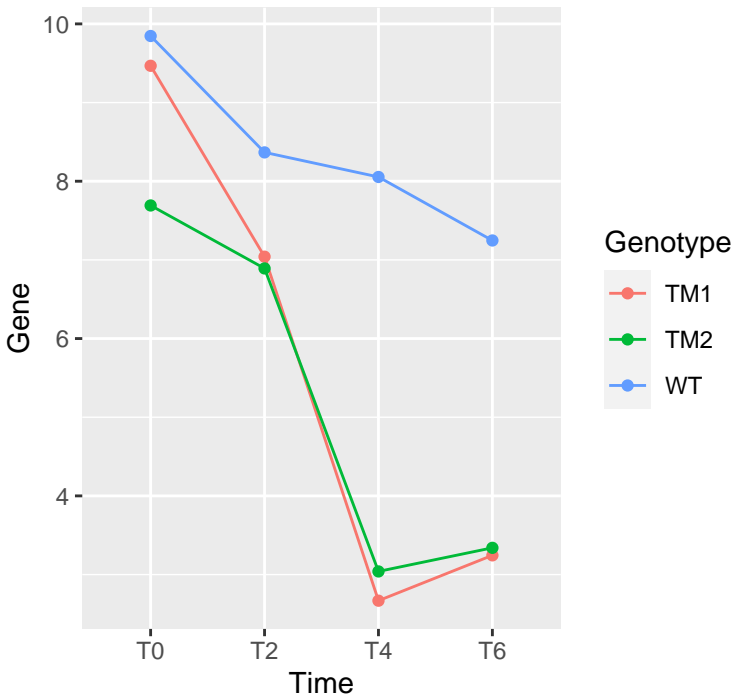

# AT5G15230

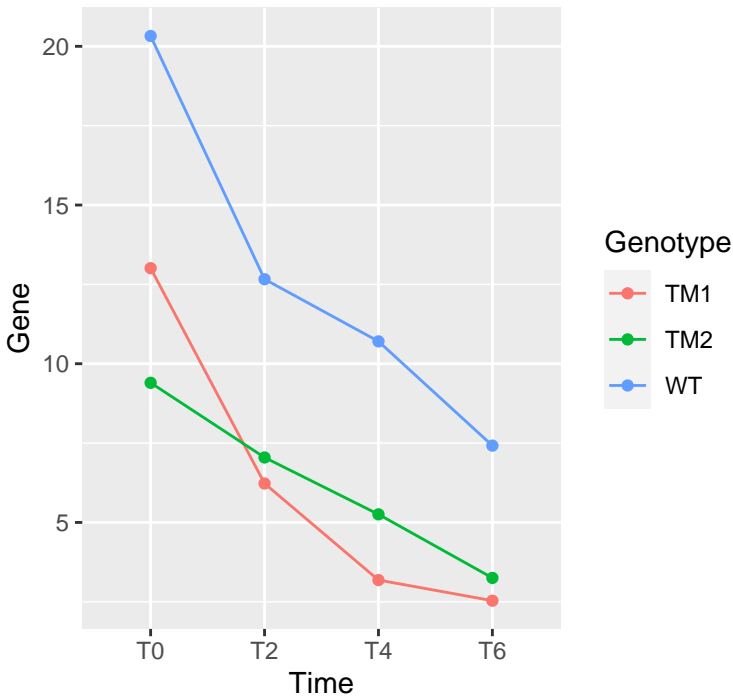

# AT5G15780

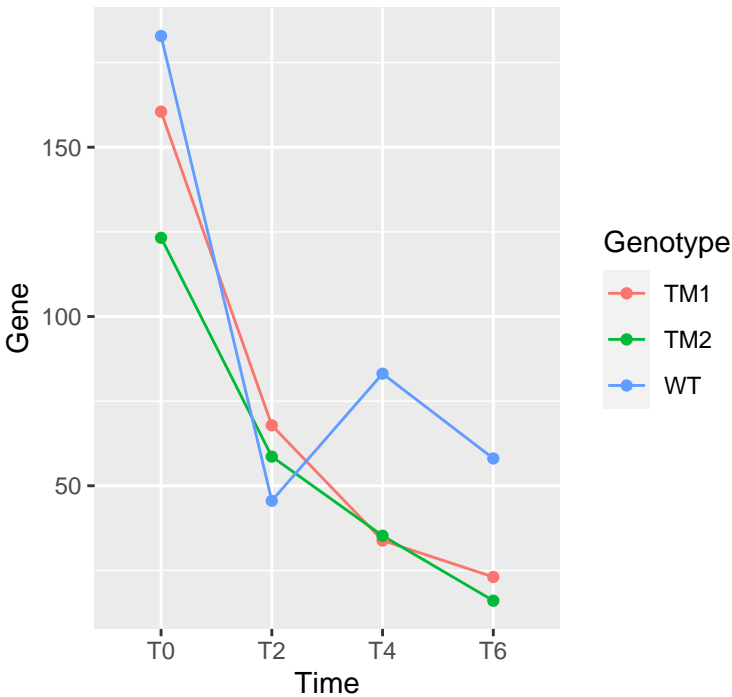

# AT5G15800

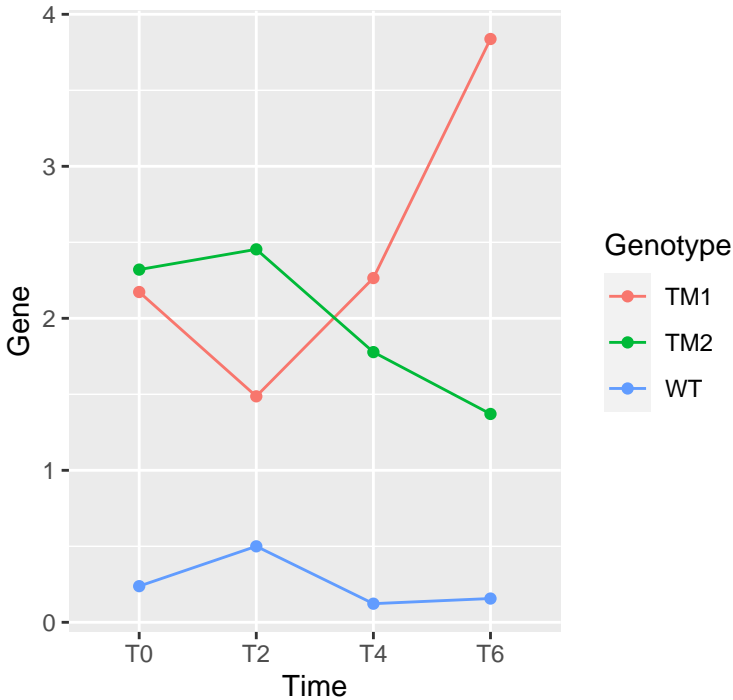

# AT5G15950

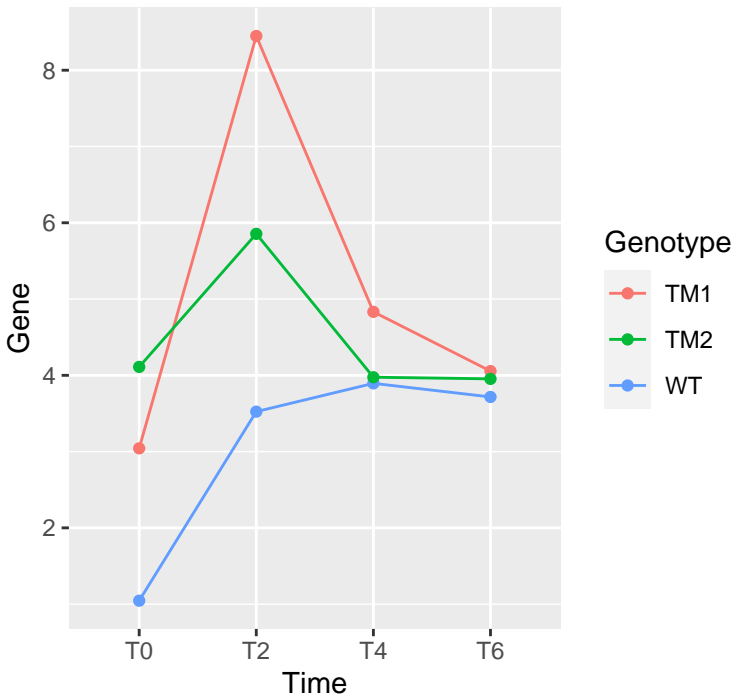

# AT5G16790

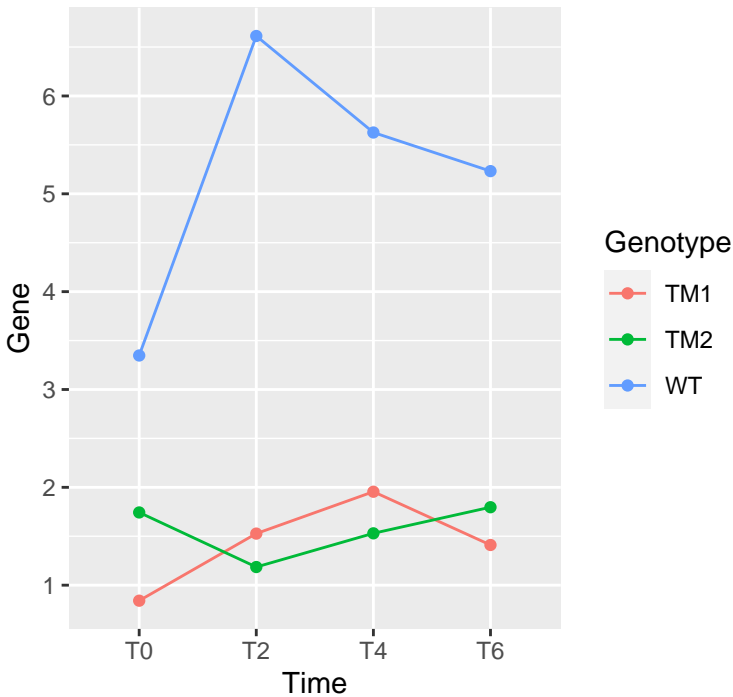



# AT5G16880

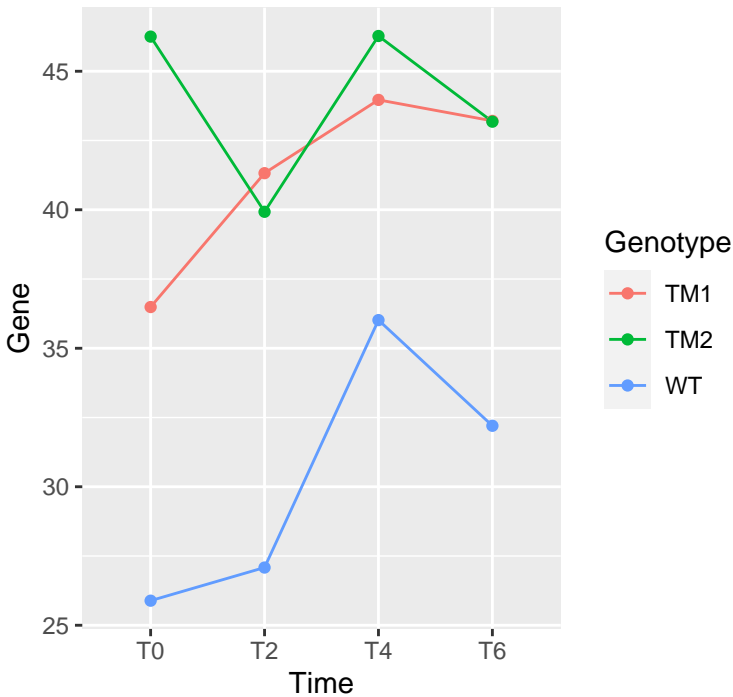

# AT5G17000

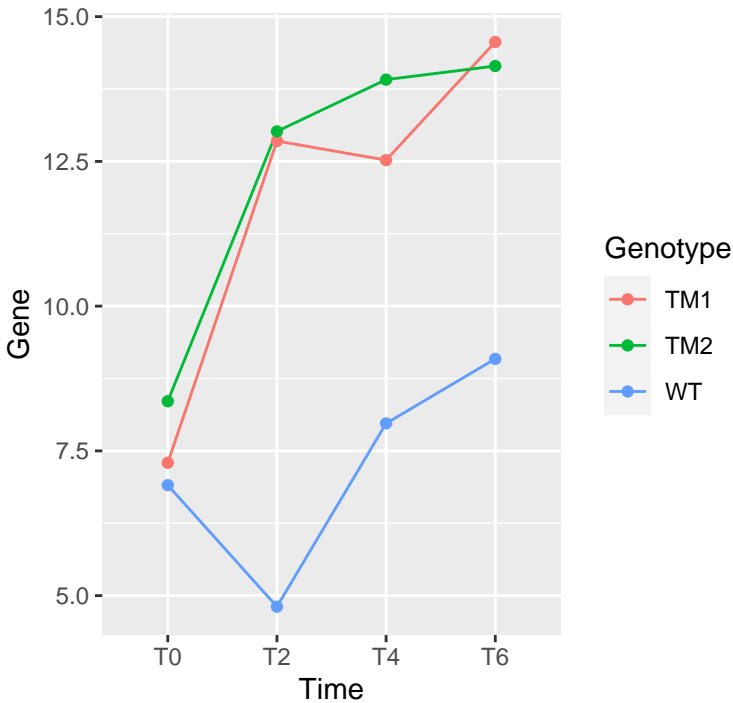

# AT5G18060

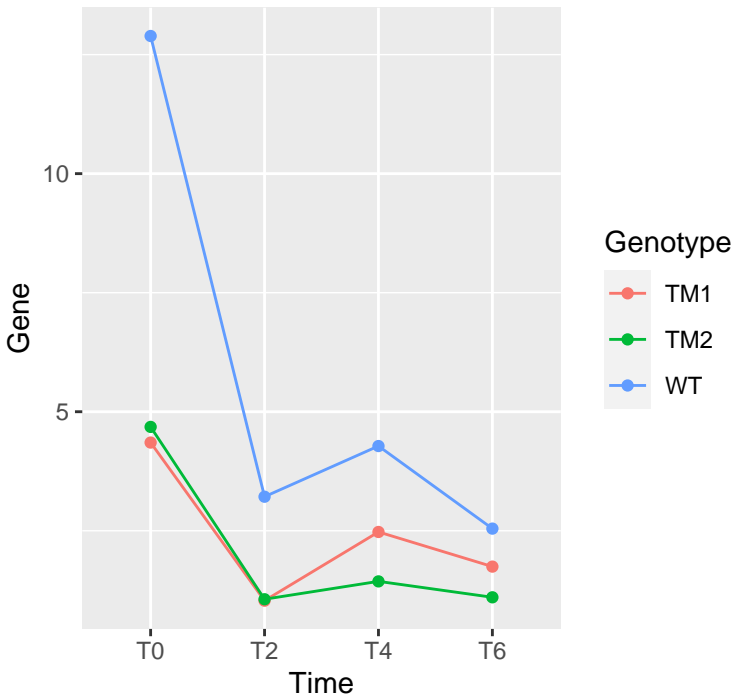

# AT5G18340

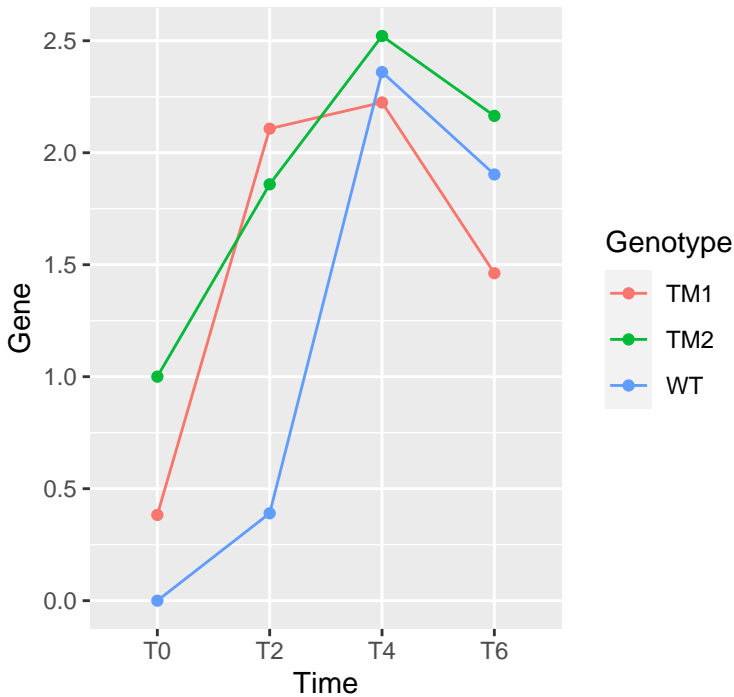

# AT5G20630

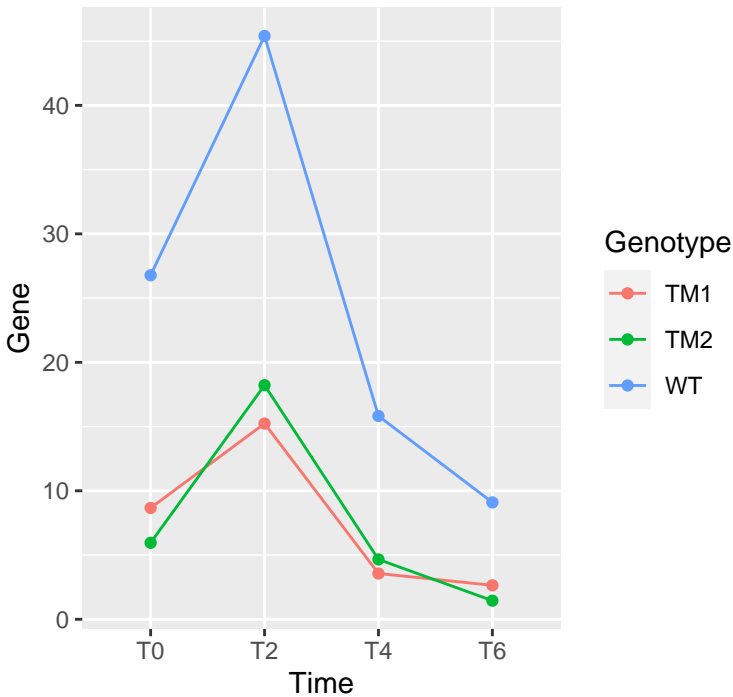

# AT5G21940

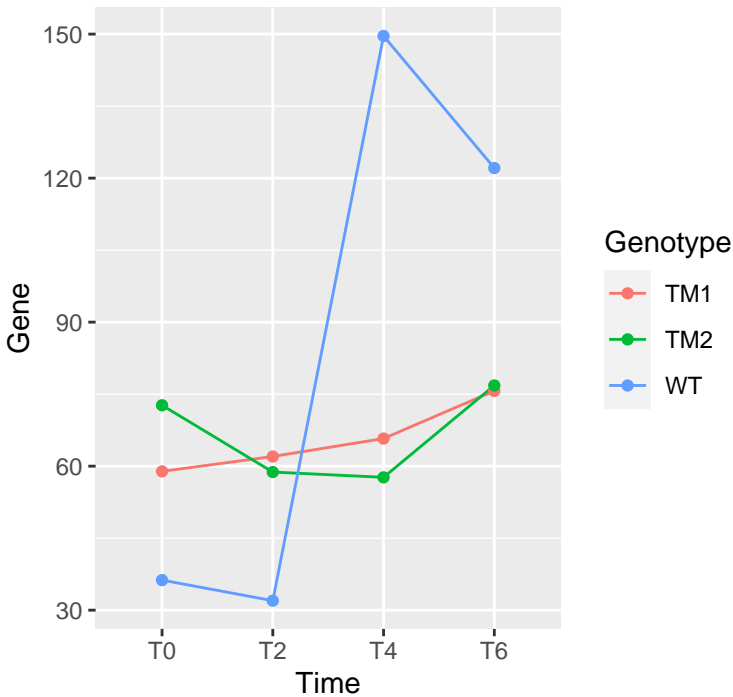

# AT5G22580

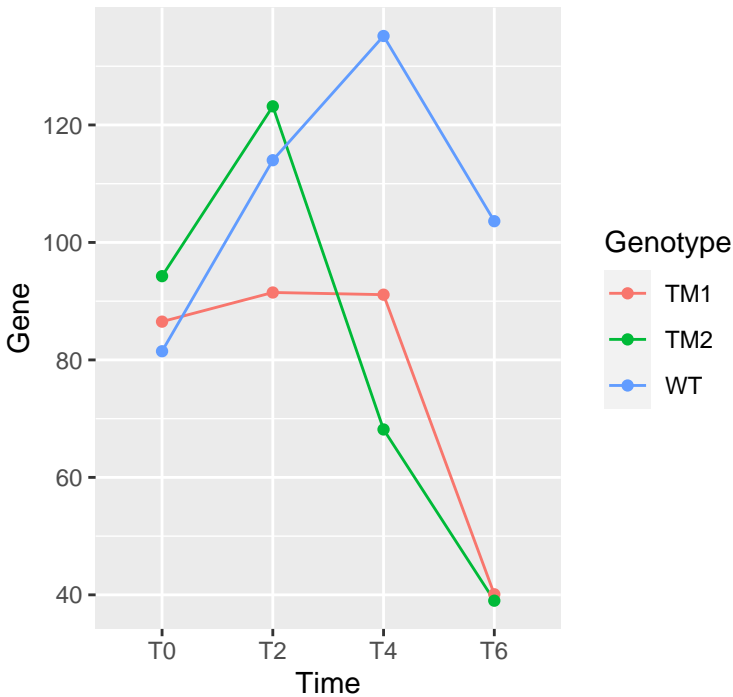

# AT5G23050

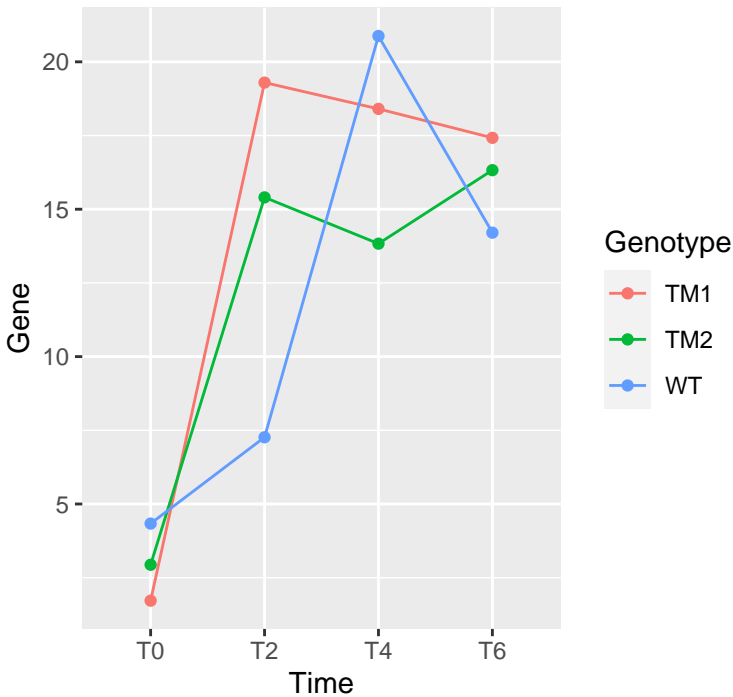



# AT5G23860

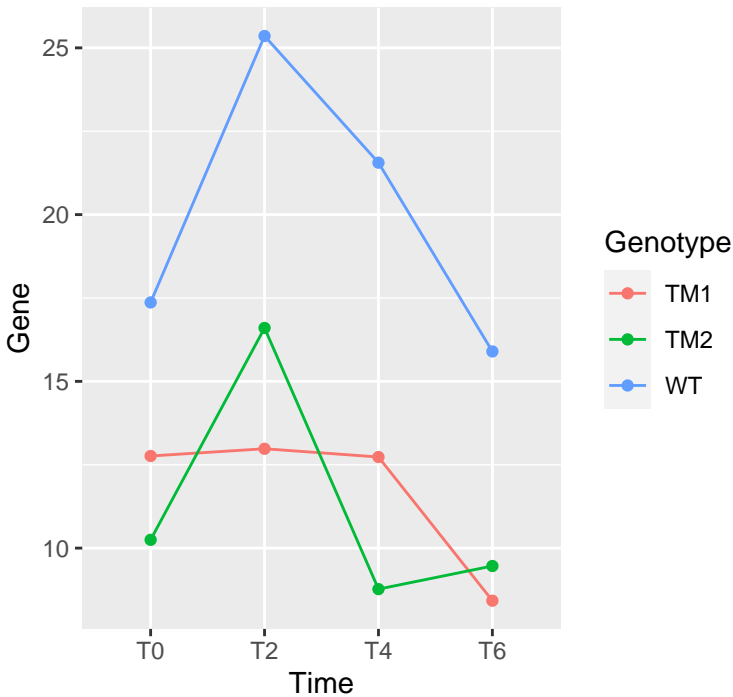

# AT5G24080

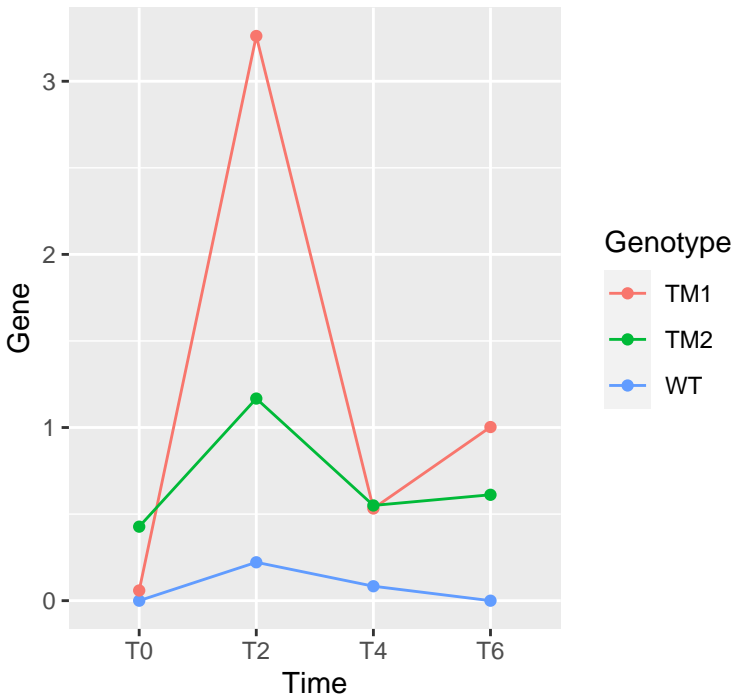

# AT5G24300

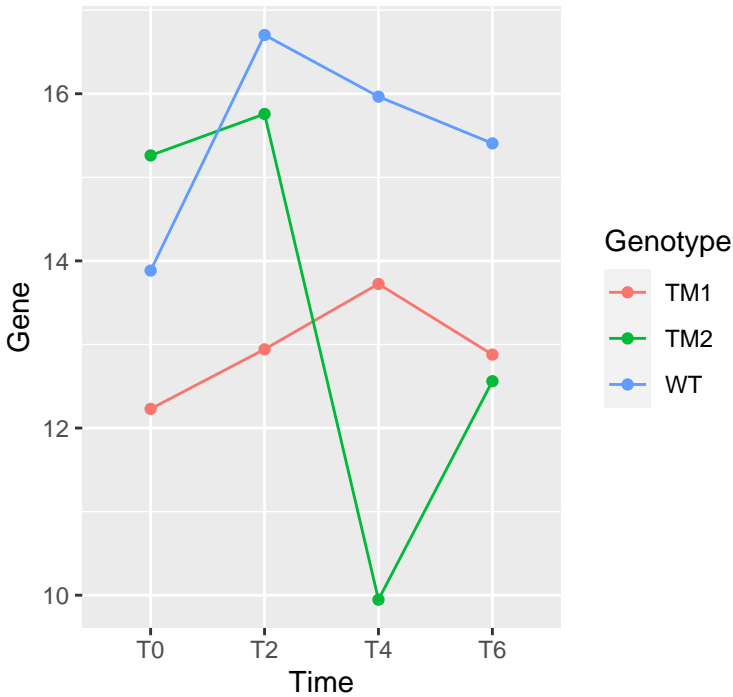

# AT5G24750

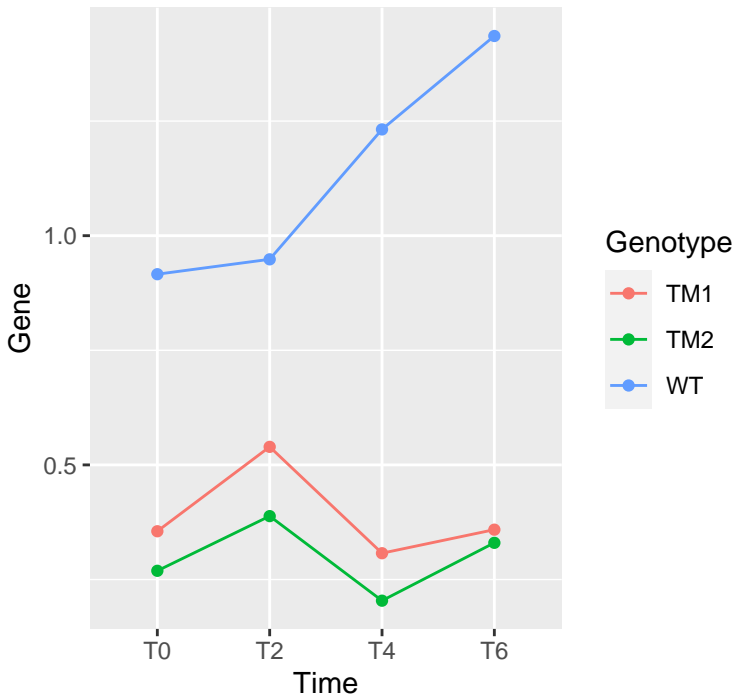

# AT5G25190

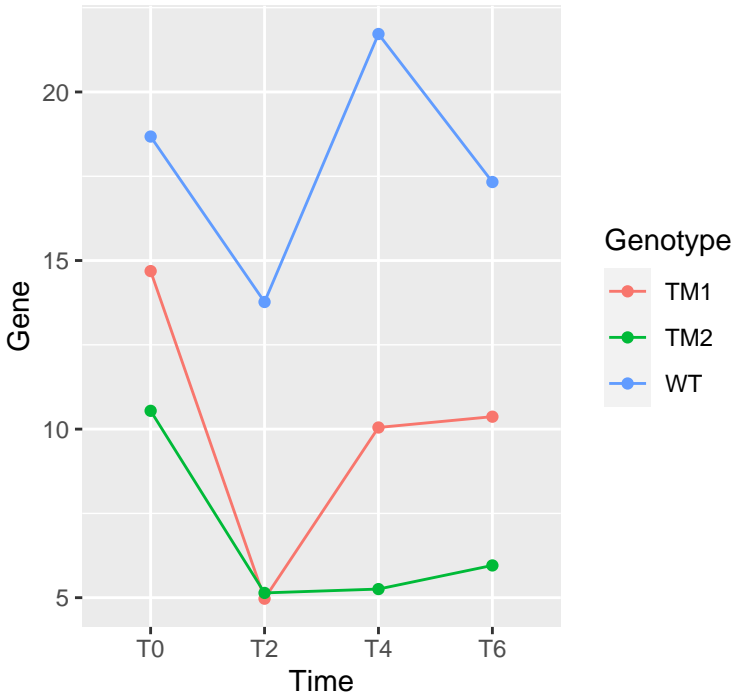

# AT5G25980

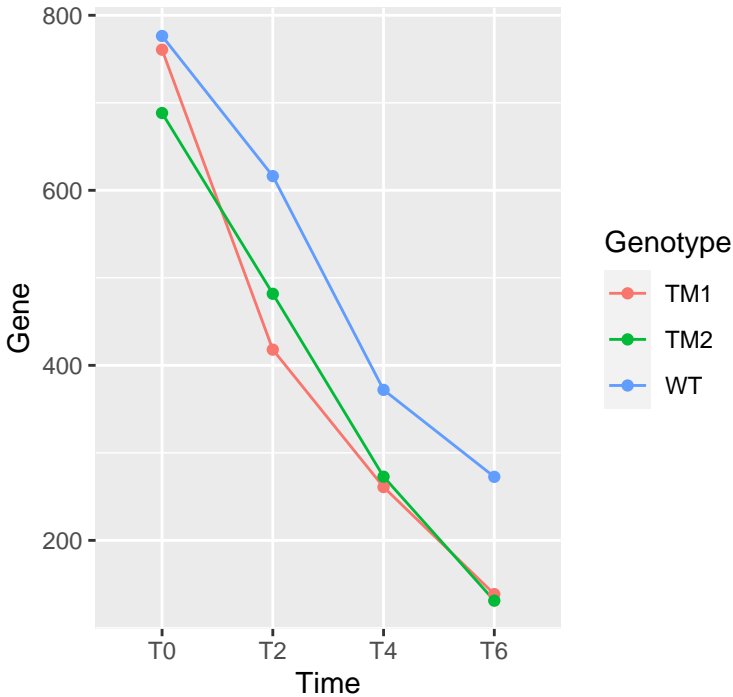

# AT5G26000

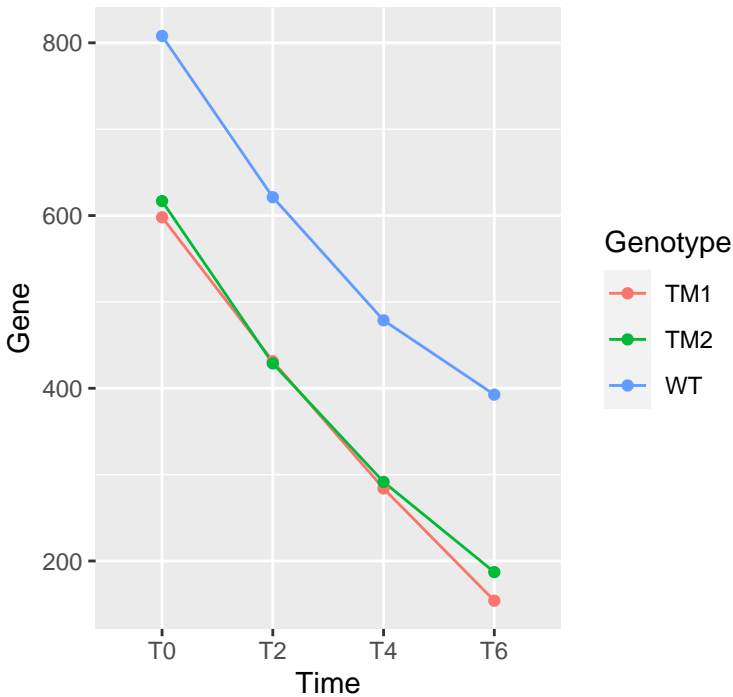

# AT5G26670

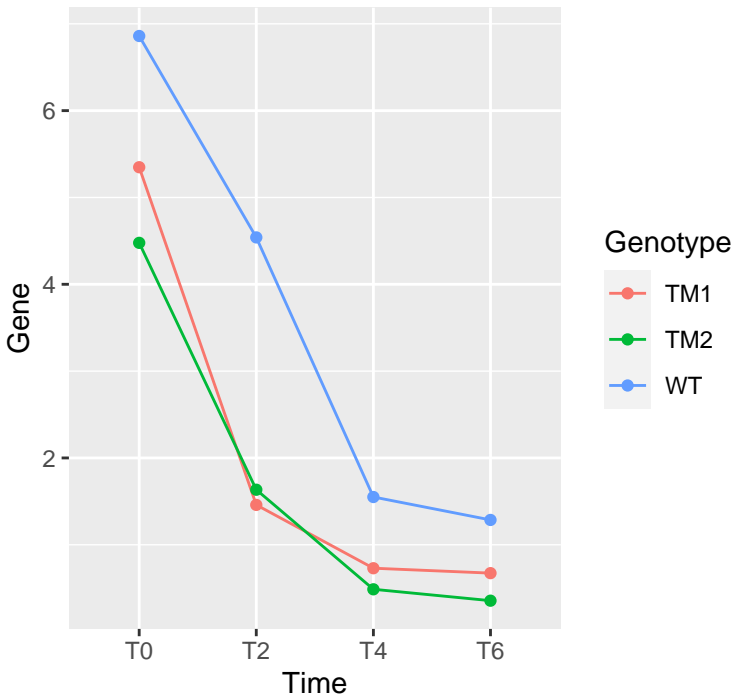



# AT5G27760

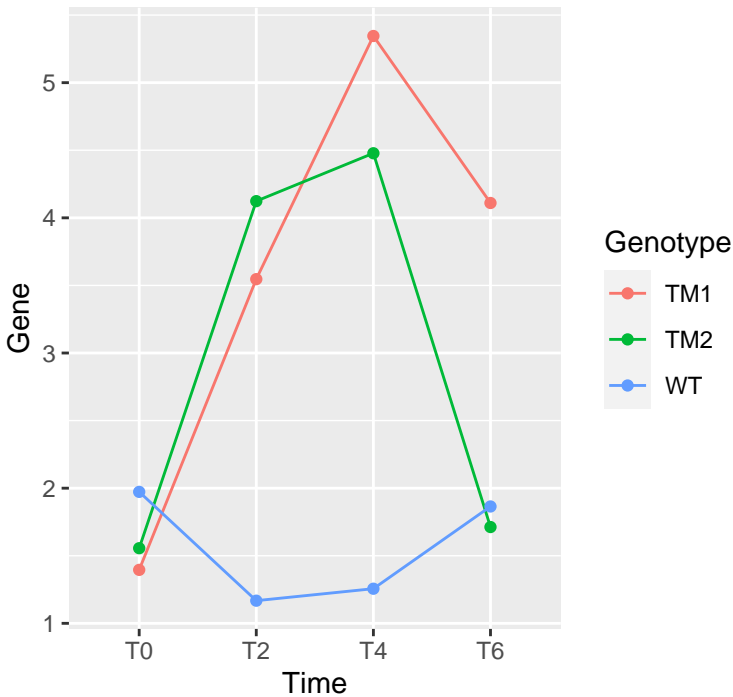

# AT5G38710

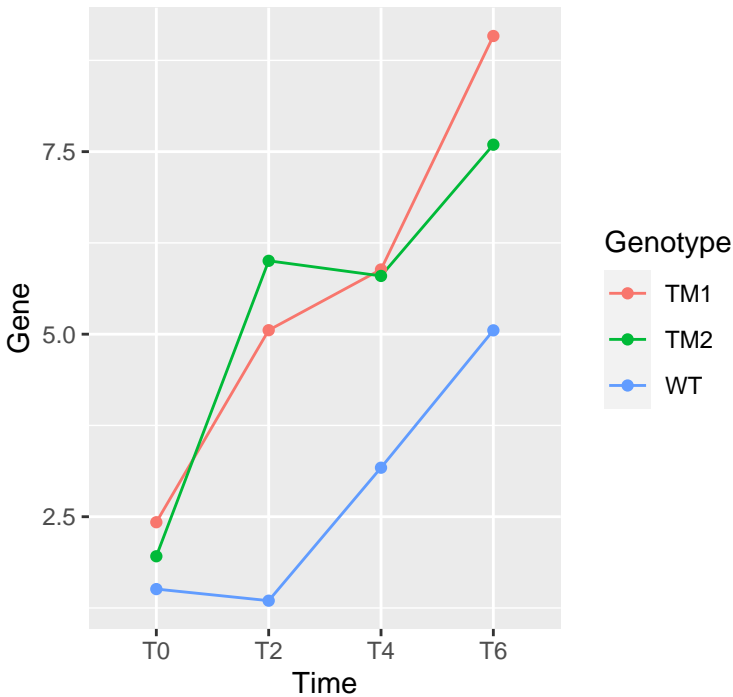

# AT5G39050

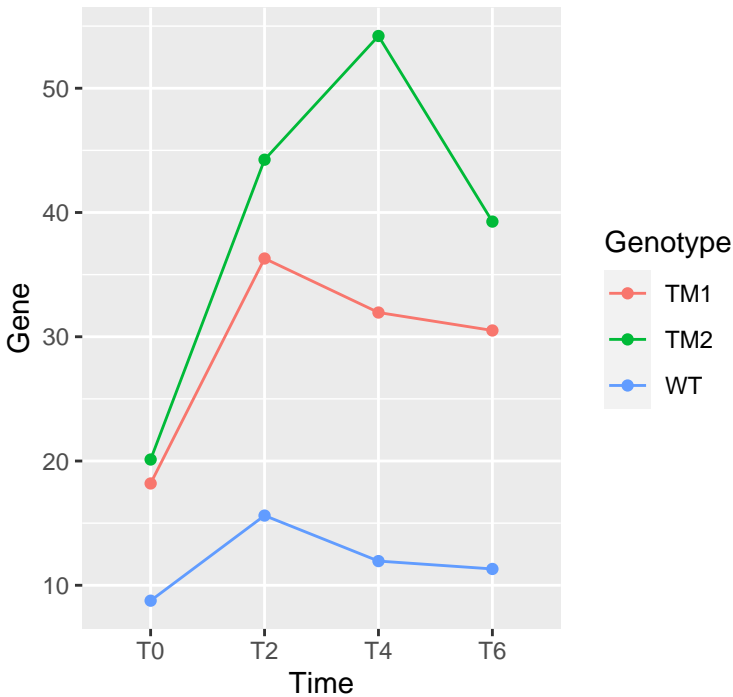

# AT5G39090

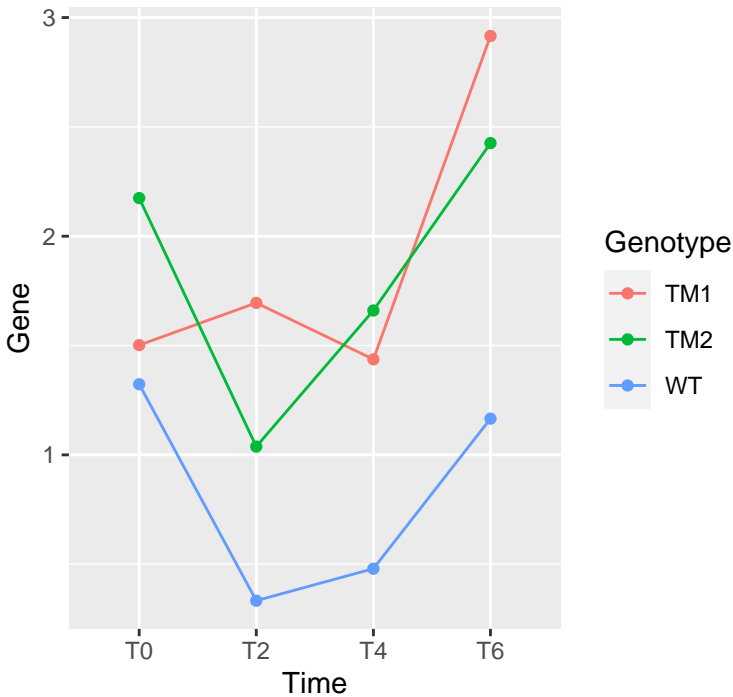

# AT5G39610

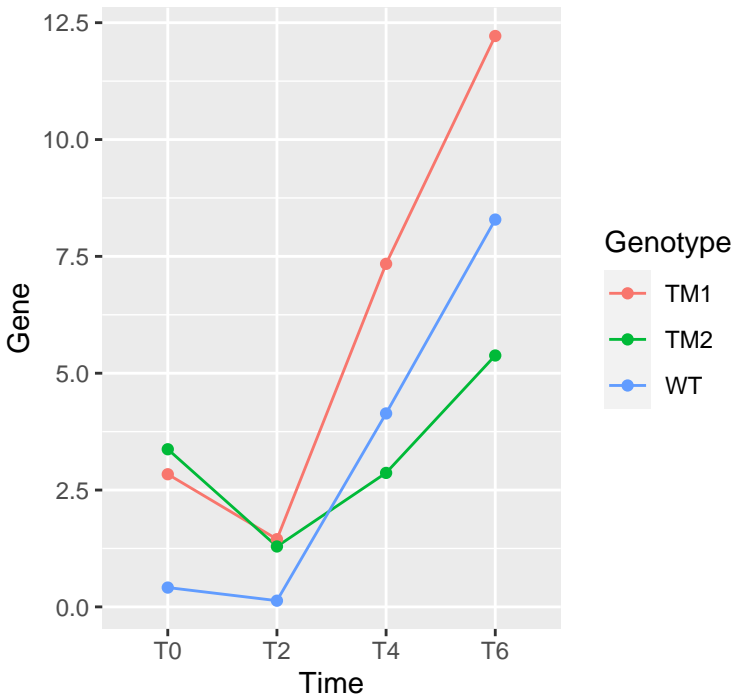

# AT5G43260

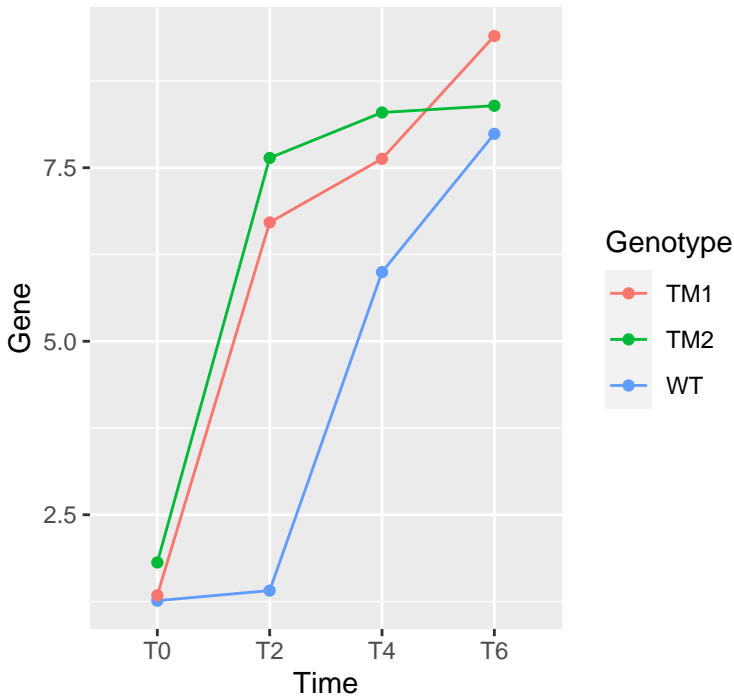

# AT5G45670

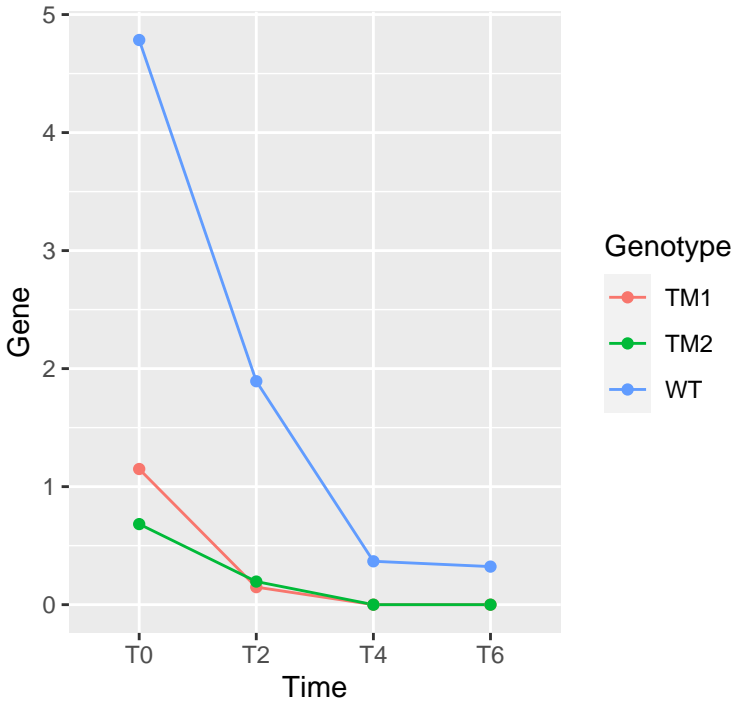

# AT5G45950

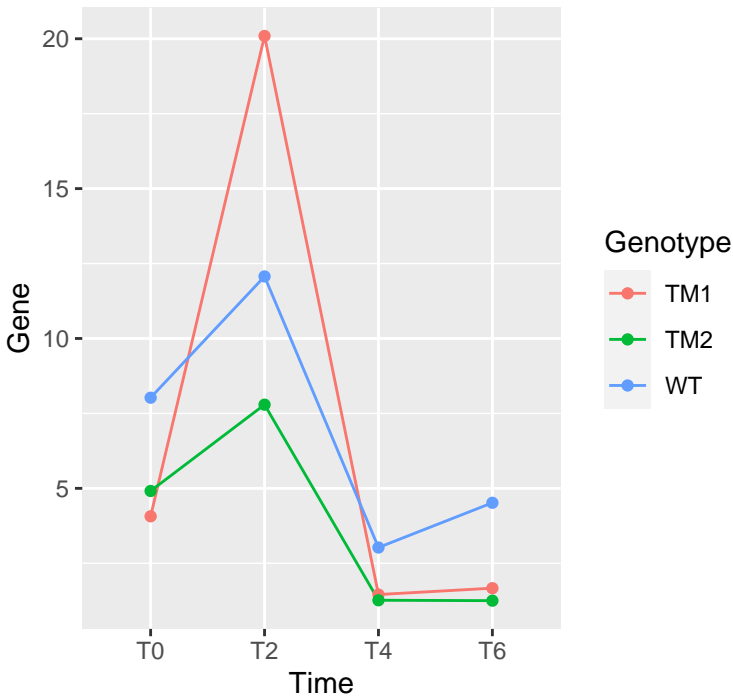



# AT5G46295

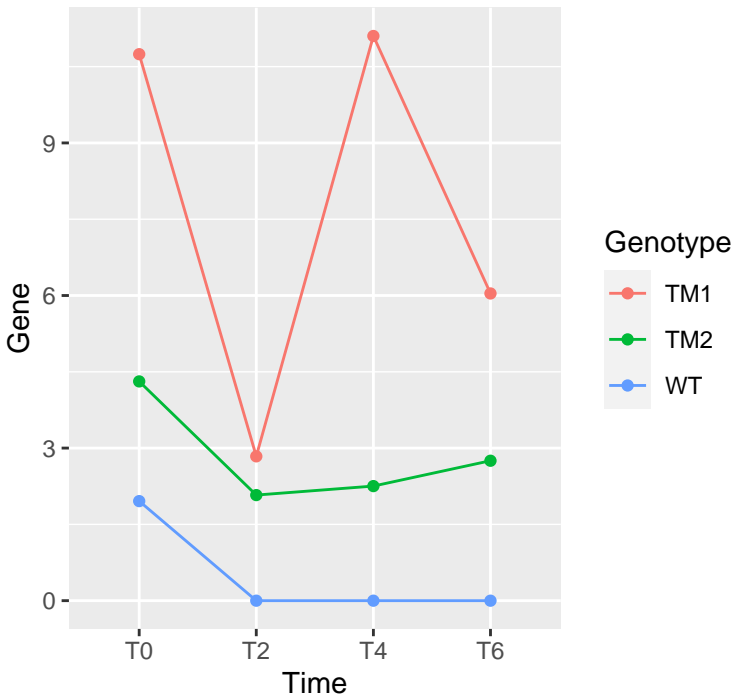

# AT5G46710

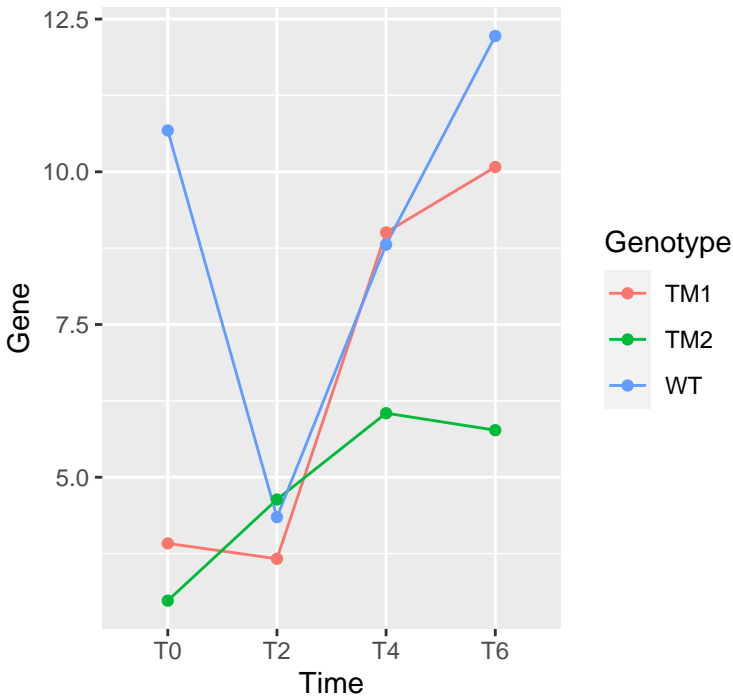

# AT5G47120

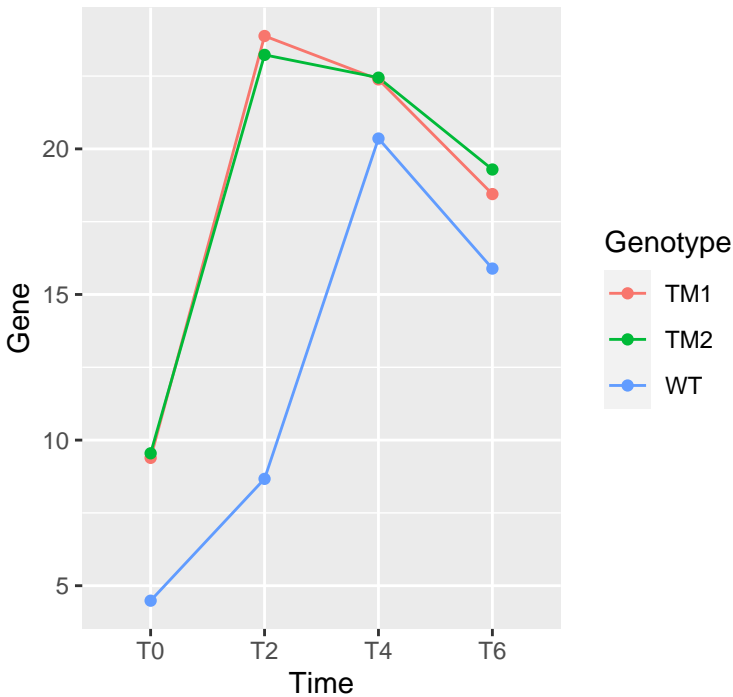

# AT5G48900

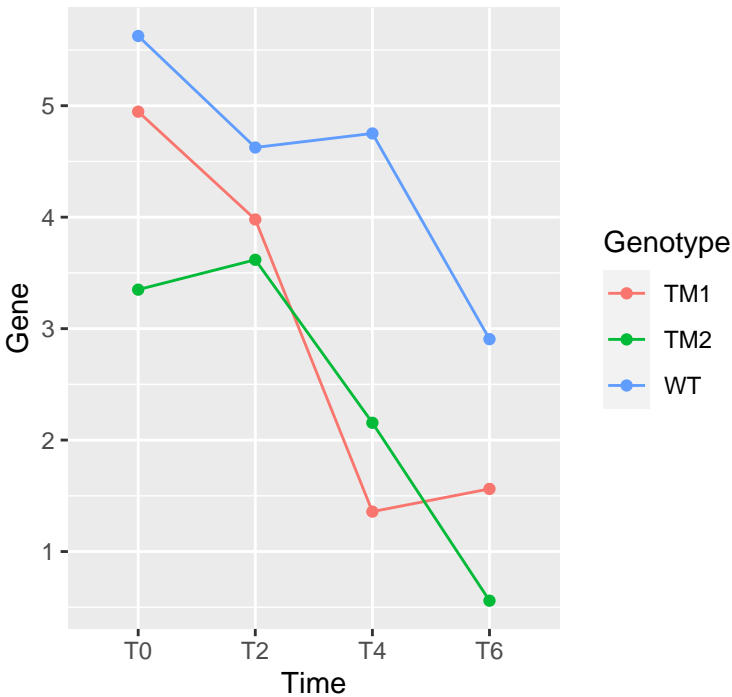

# AT5G49160

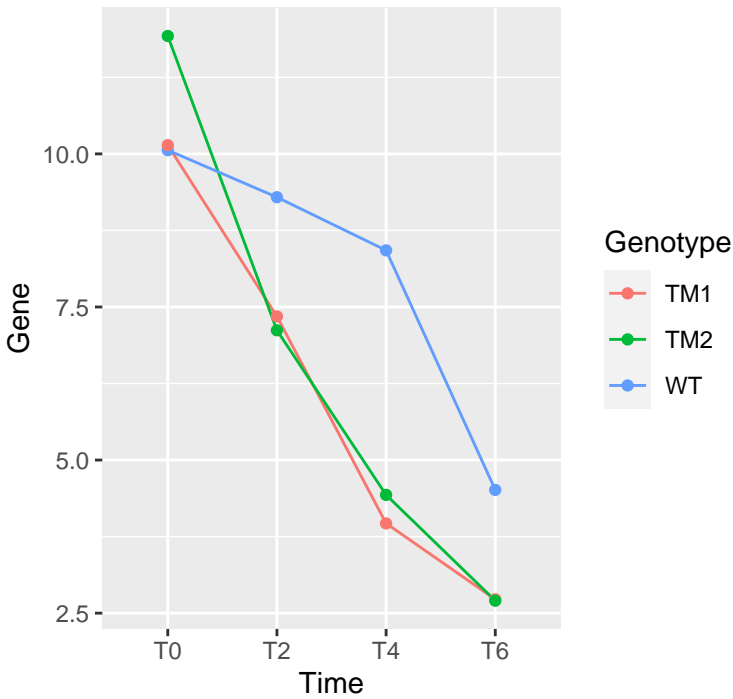

# AT5G49480

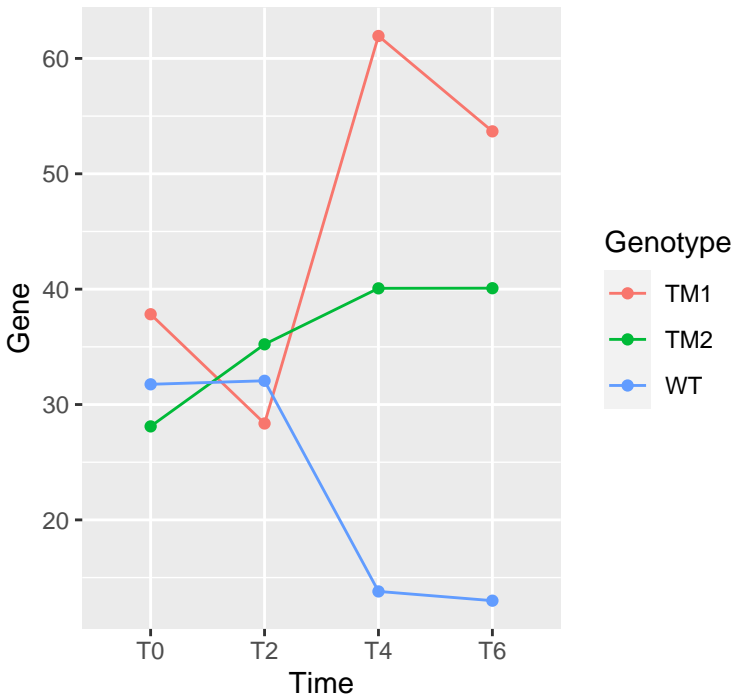

# AT5G49520

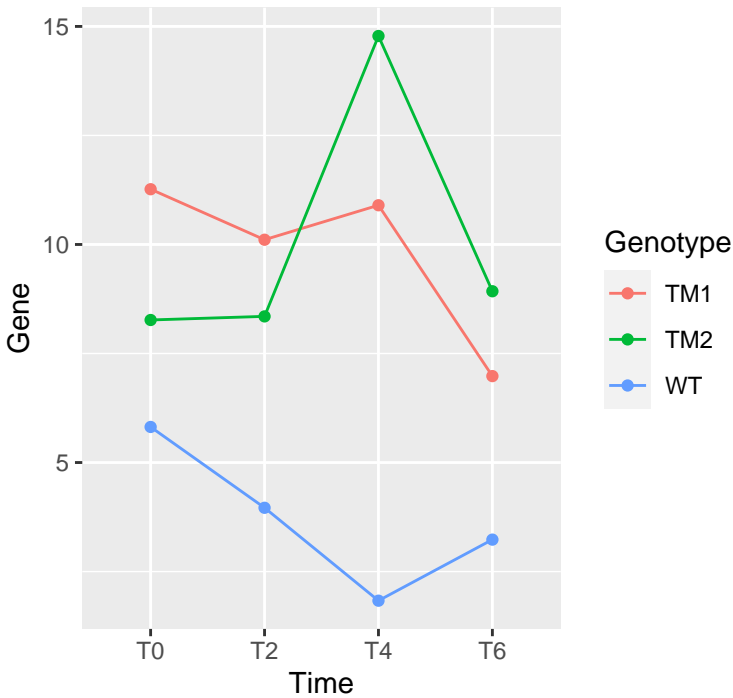

# AT5G50200

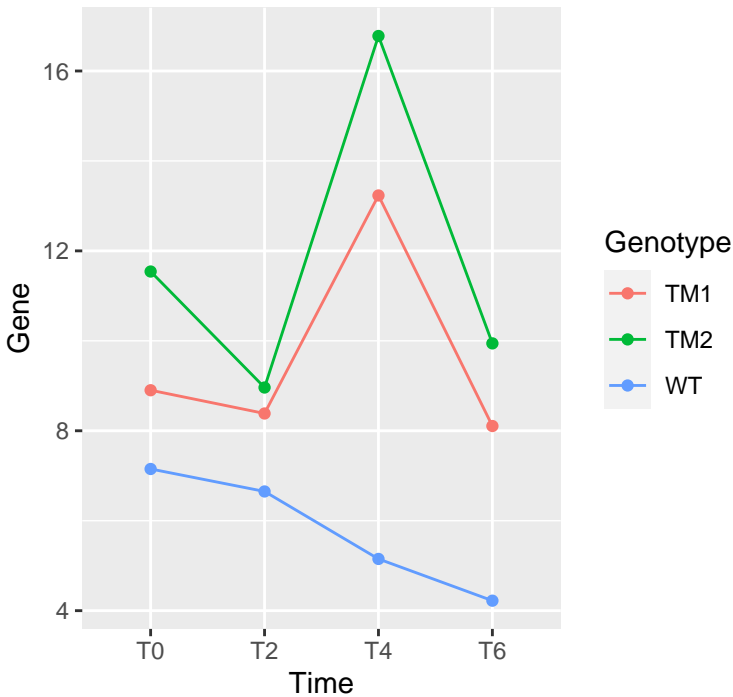



# AT5G50360

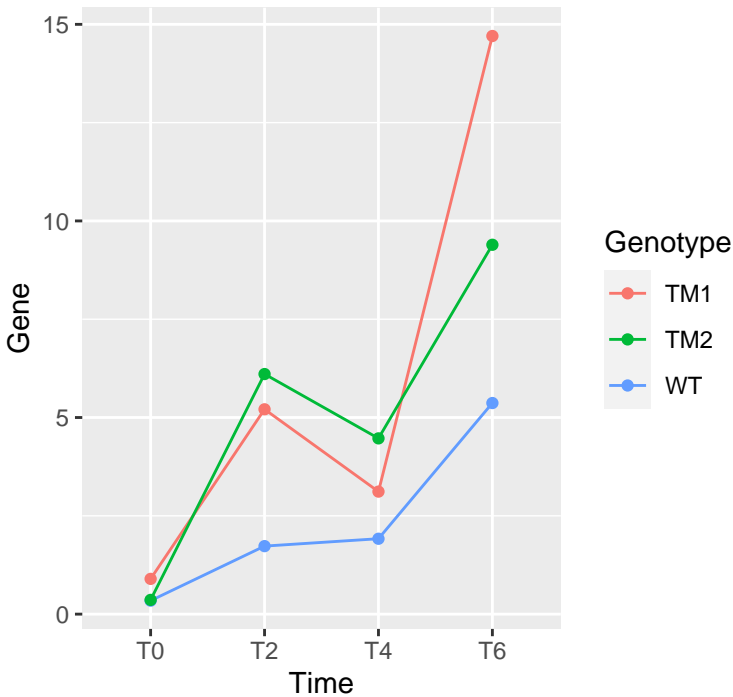

# AT5G51750

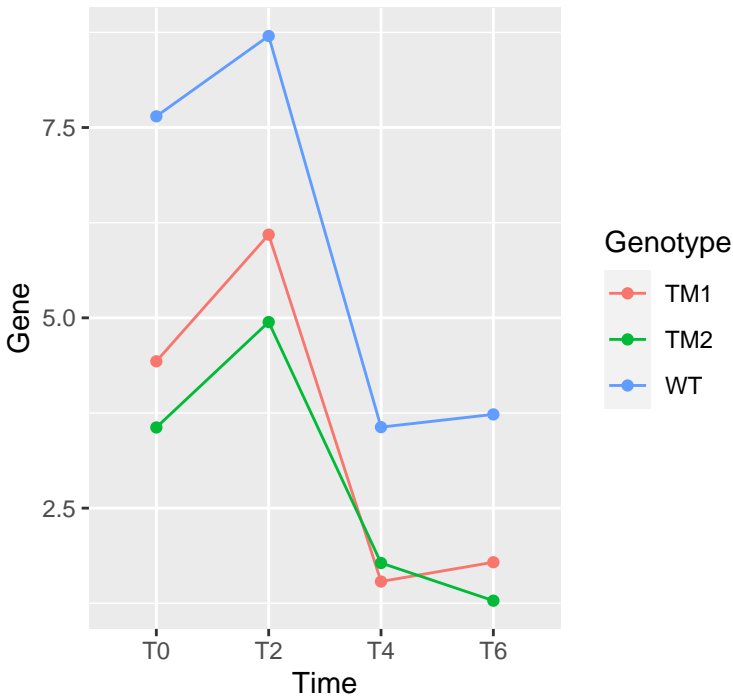

# AT5G52050

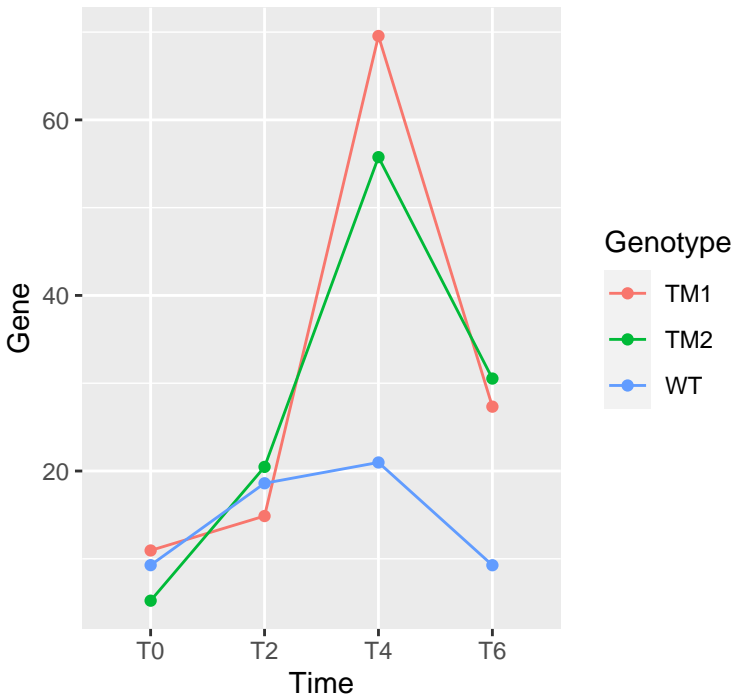

# AT5G52540

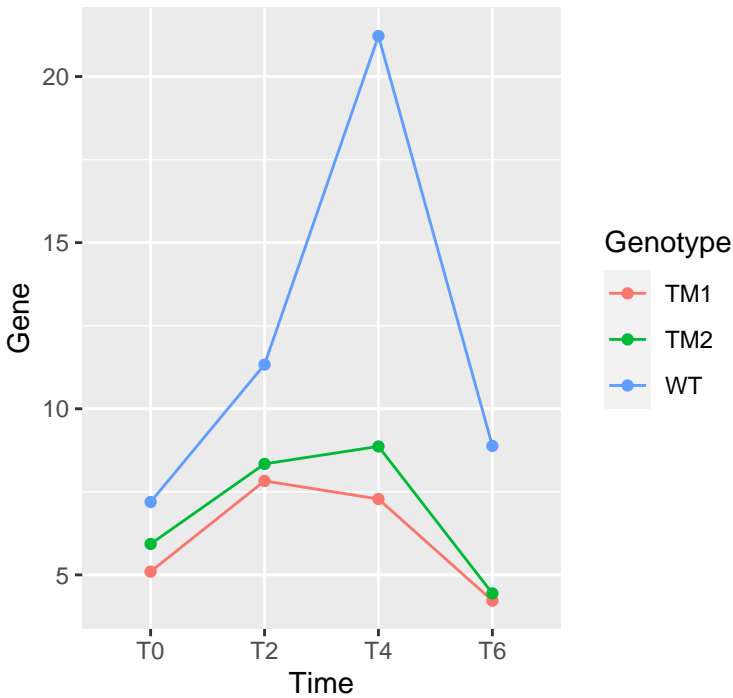

# AT5G55730

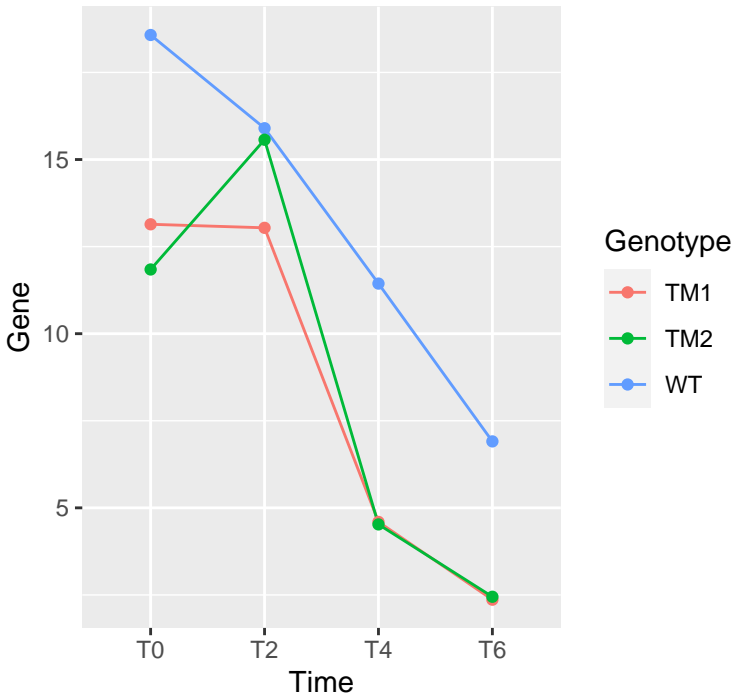

# AT5G57180

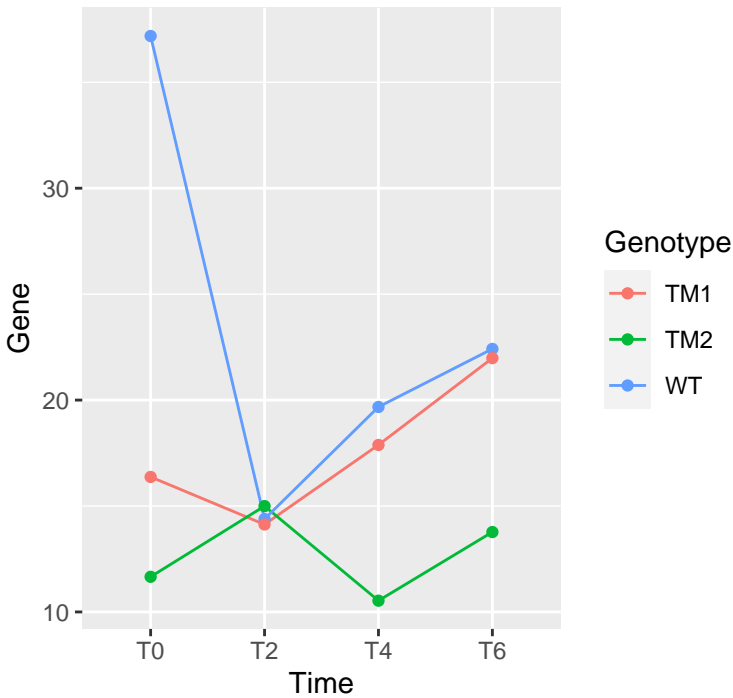

# AT5G57320

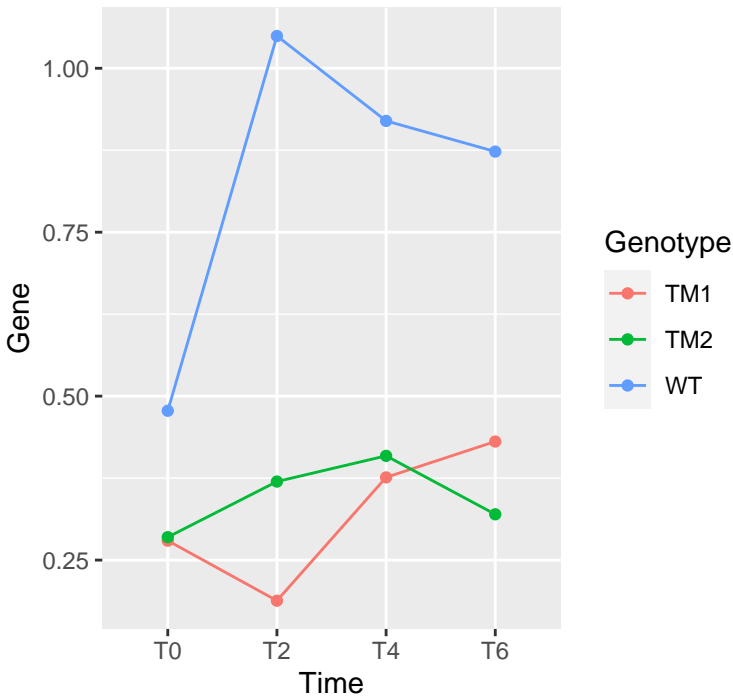

# AT5G57970

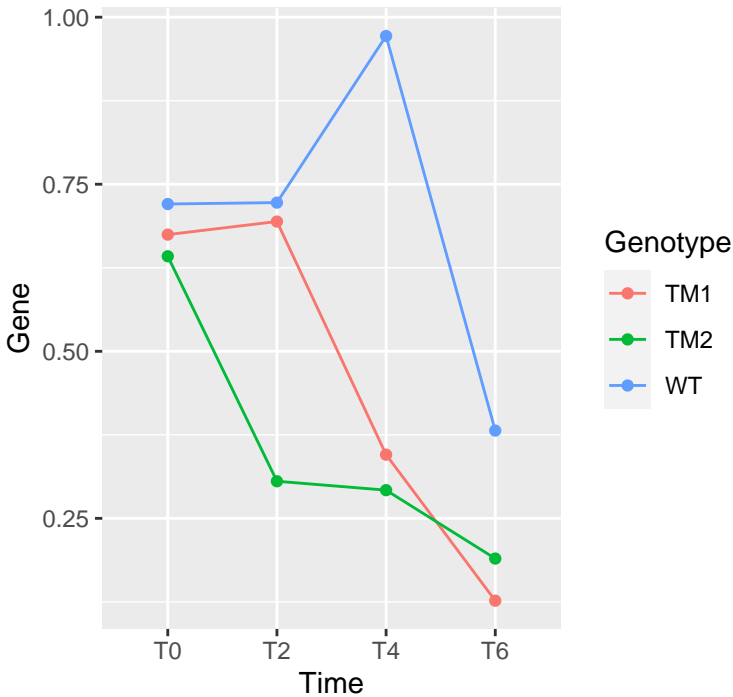



# AT5G58160

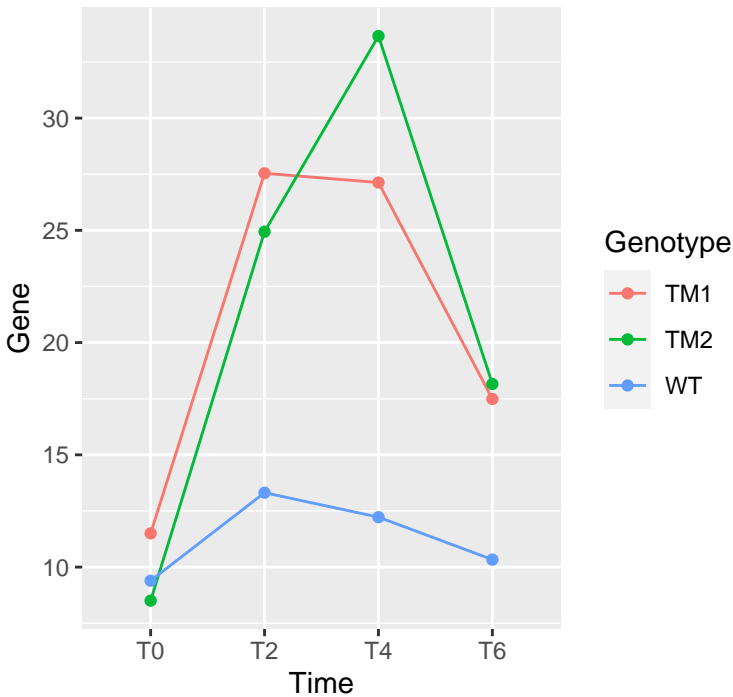

# AT5G59080

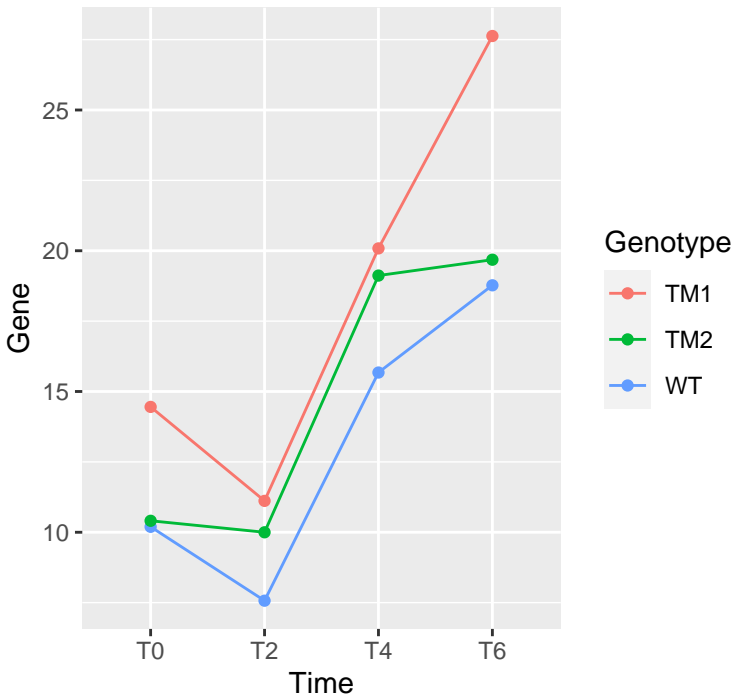

# AT5G59220

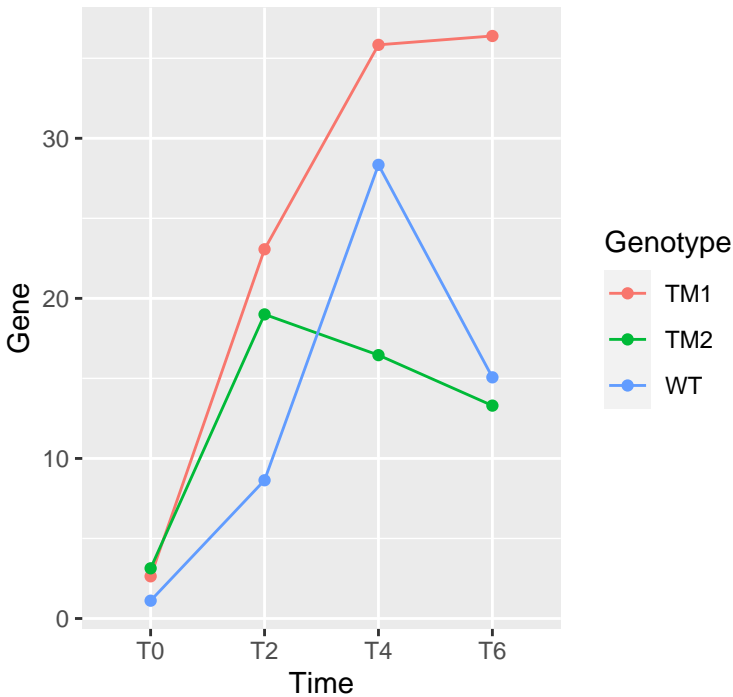

# AT5G59340

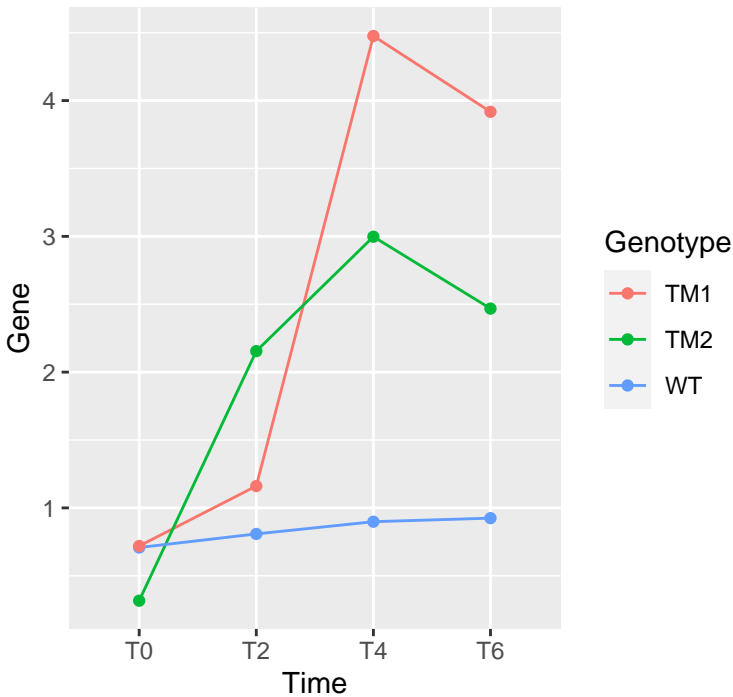

# AT5G59760

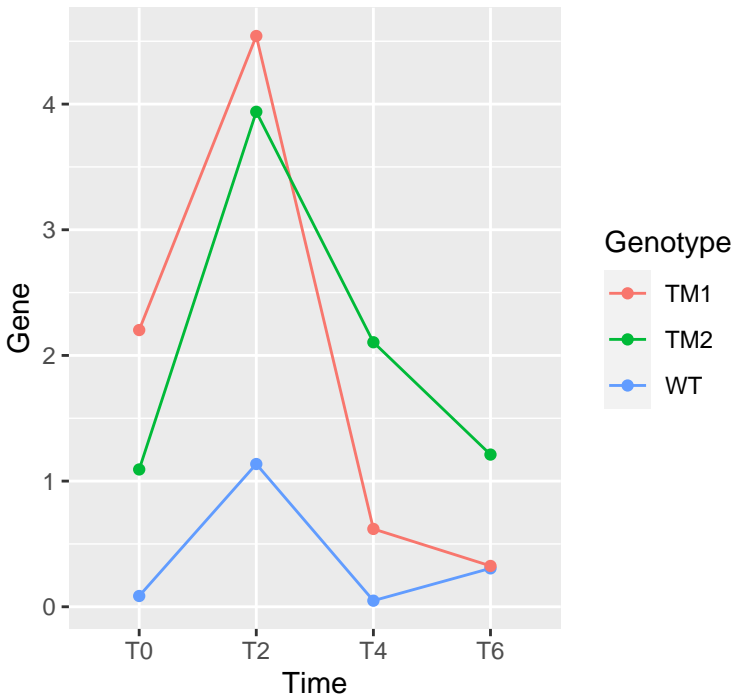

# AT5G59780

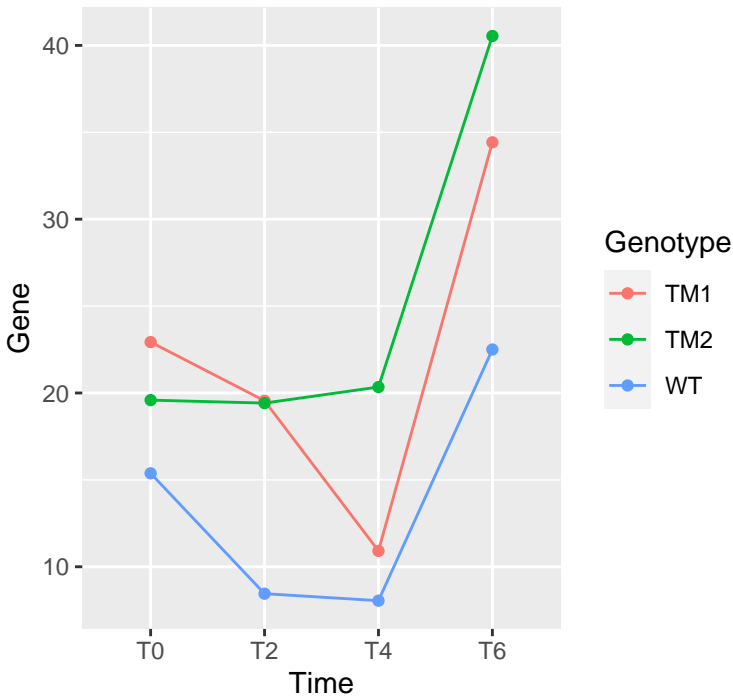

# AT5G59990

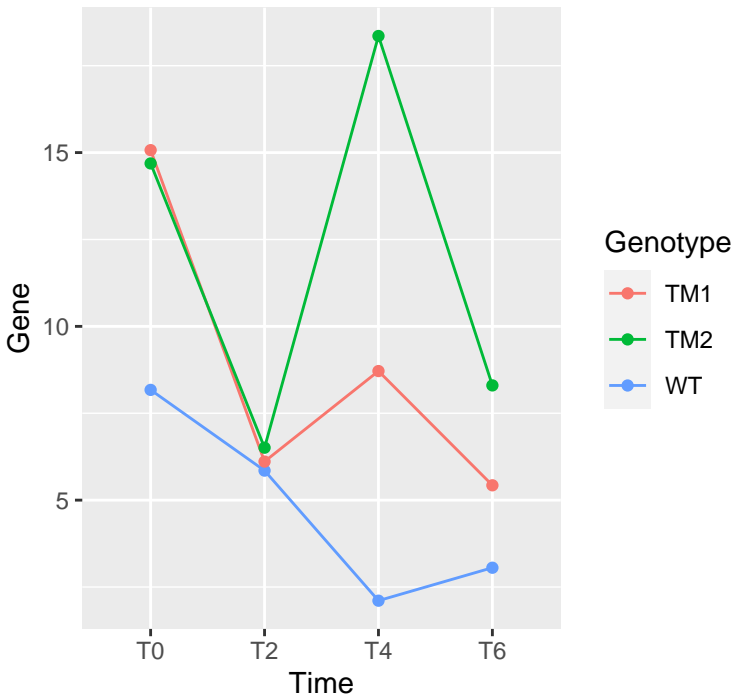

# AT5G60020

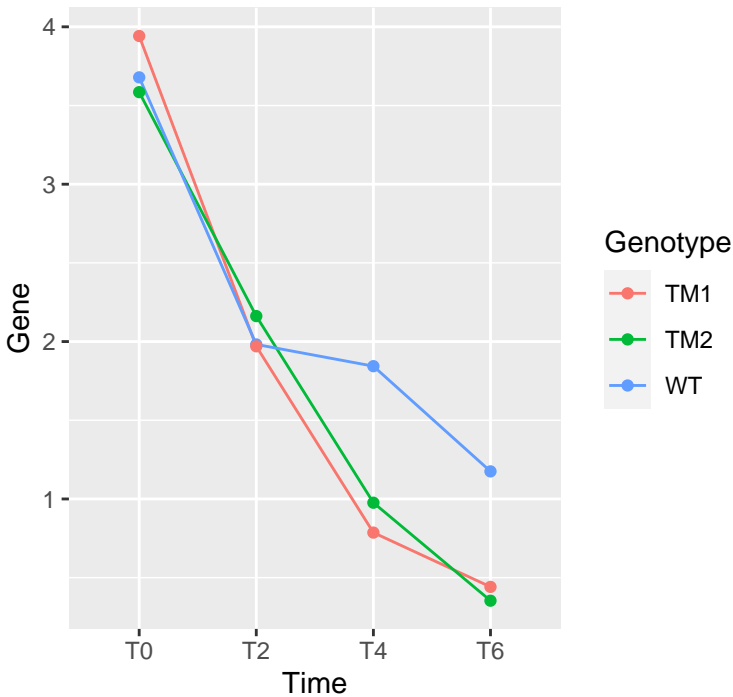



# AT5G60250

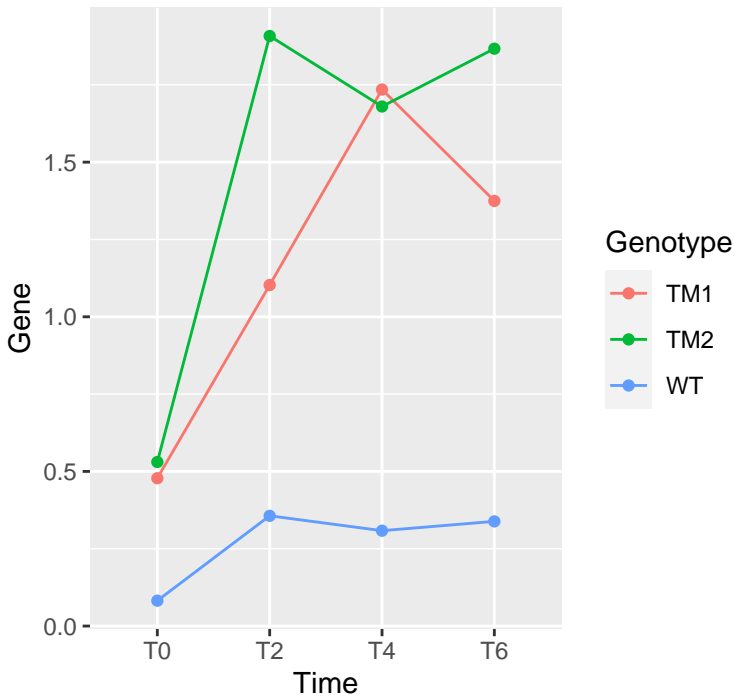

# AT5G60460

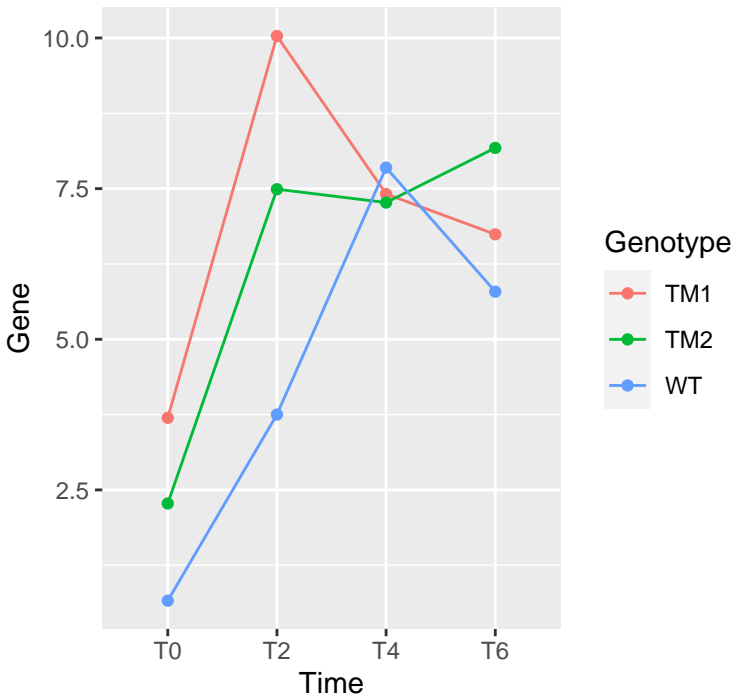

# AT5G60910

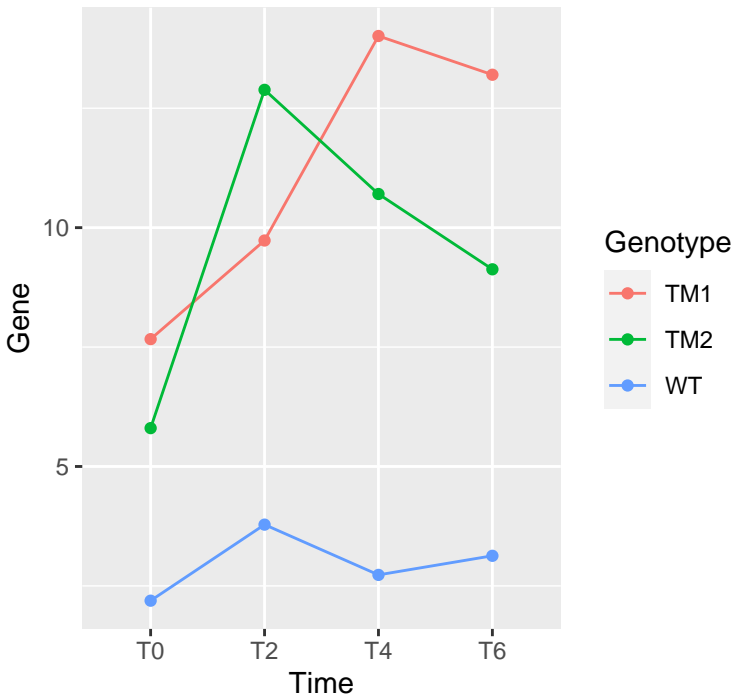

# AT5G61412

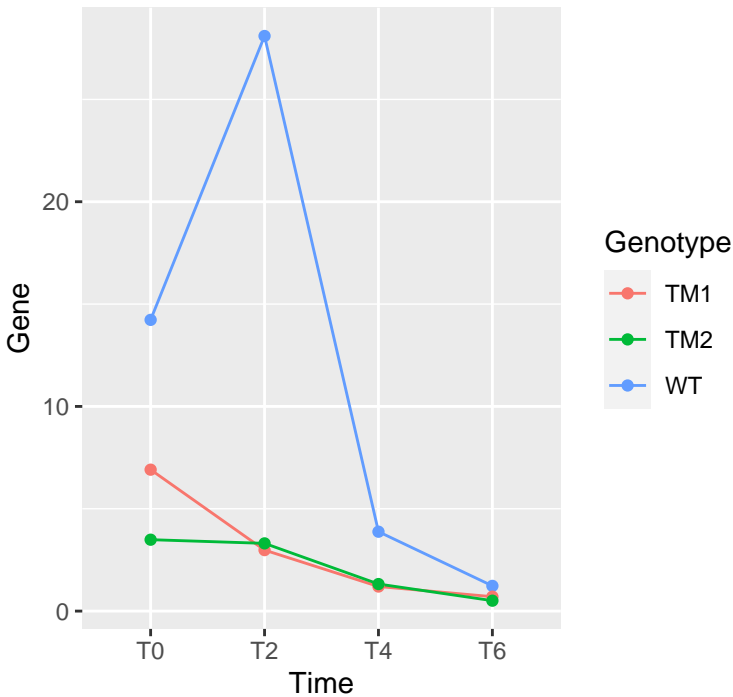

# AT5G62040

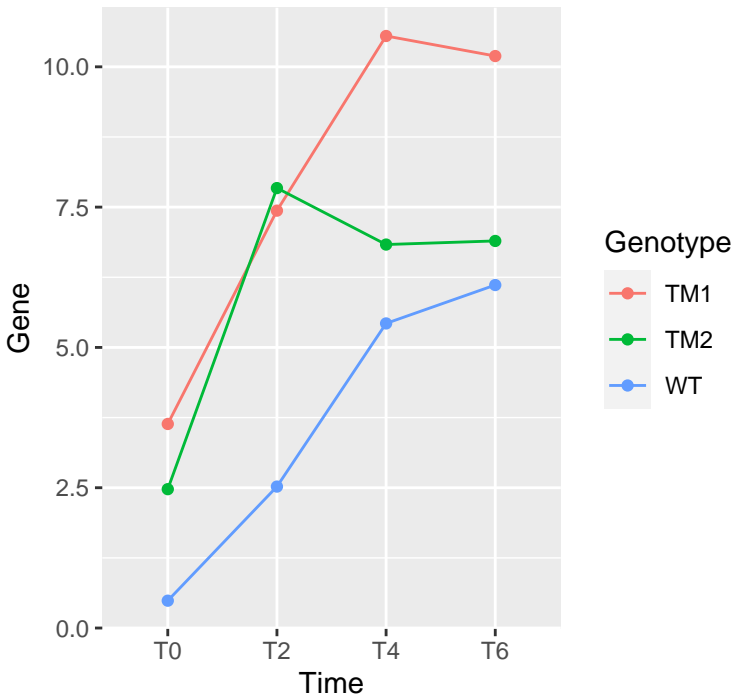

# AT5G62670

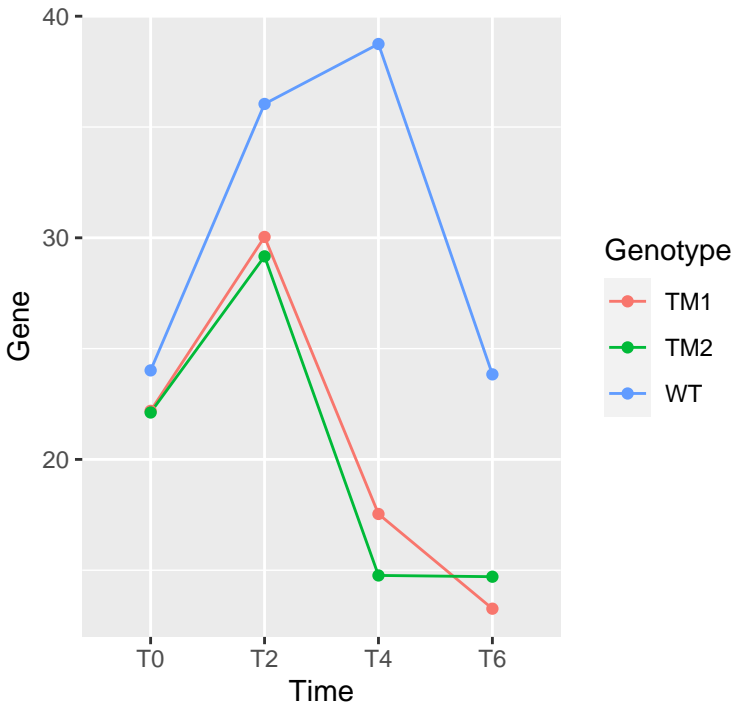

# AT5G62920

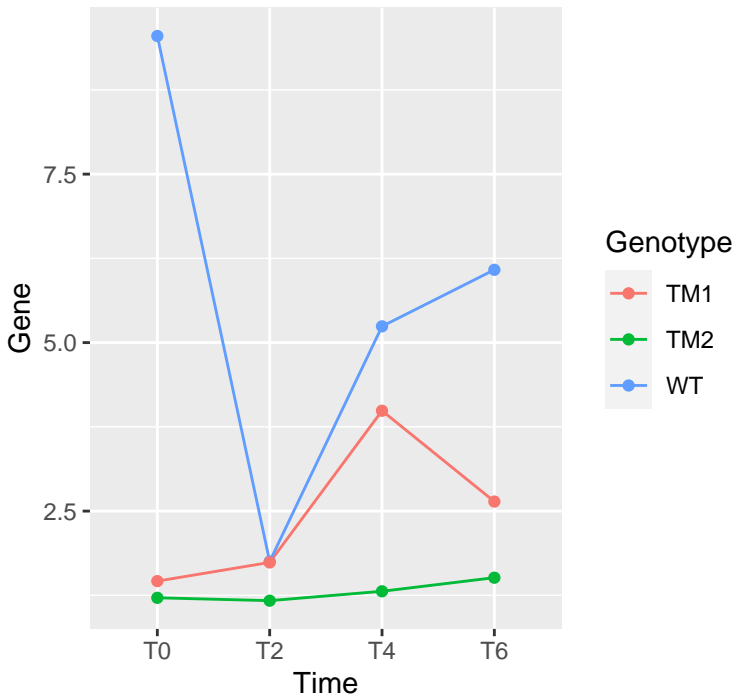

# AT5G63370

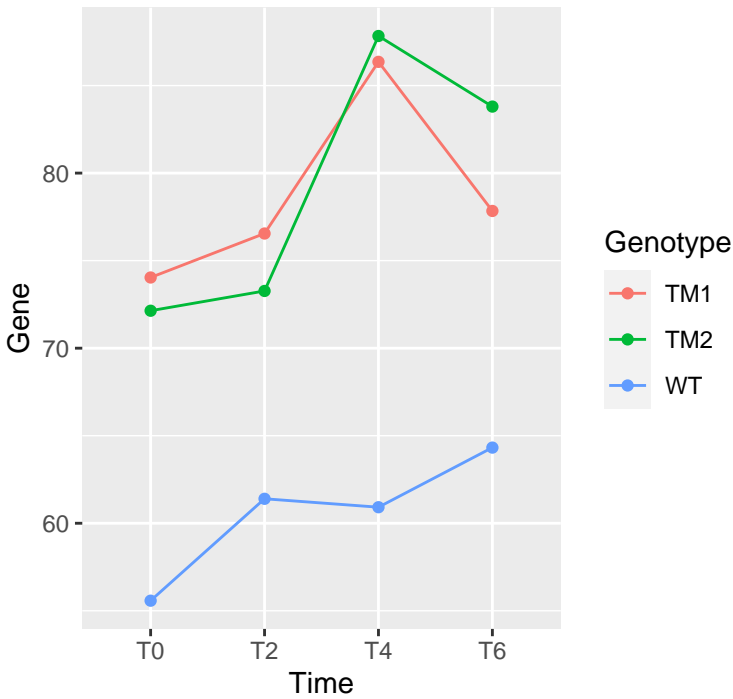



# AT5G63760

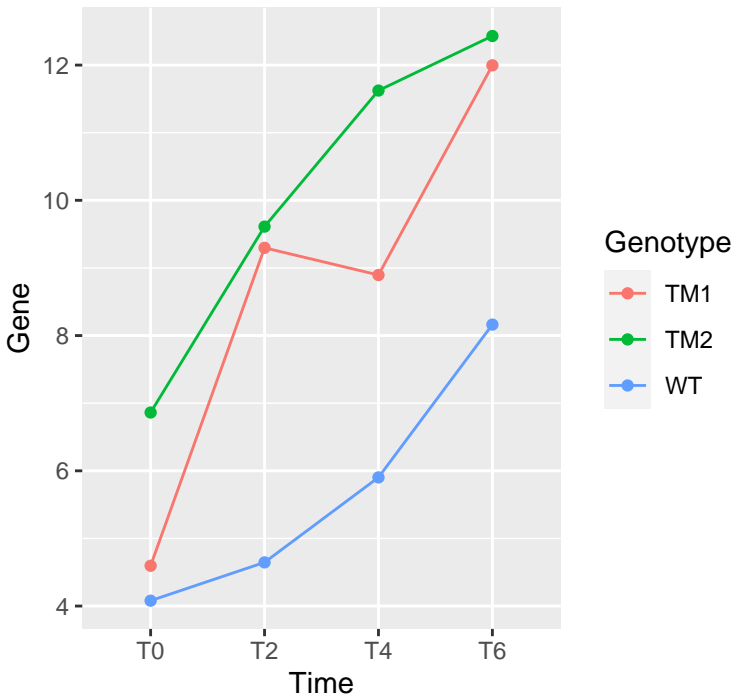

# AT5G64260

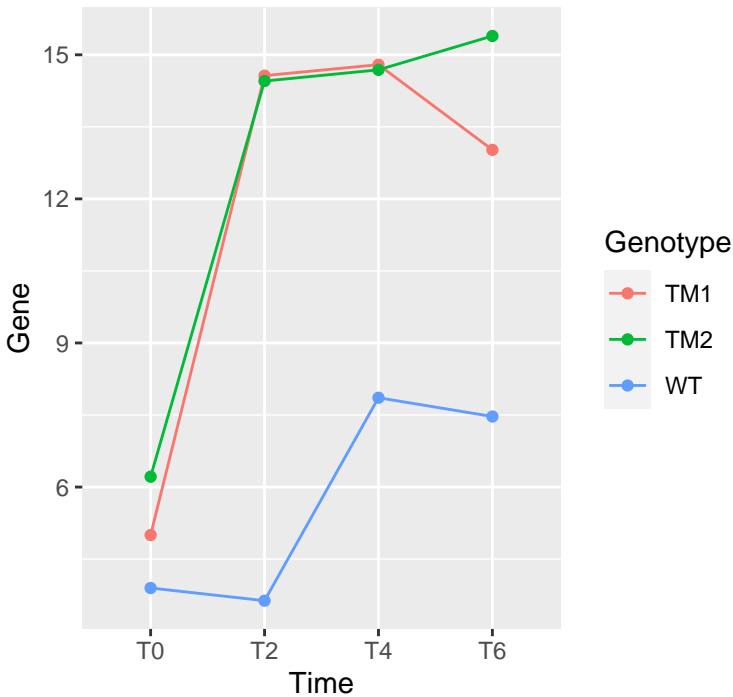

# AT5G66530

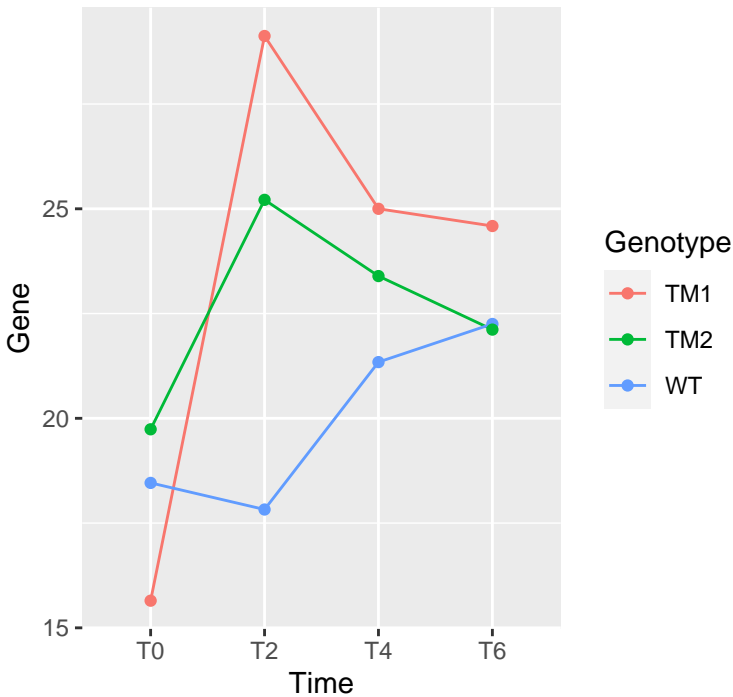

# AT5G66650

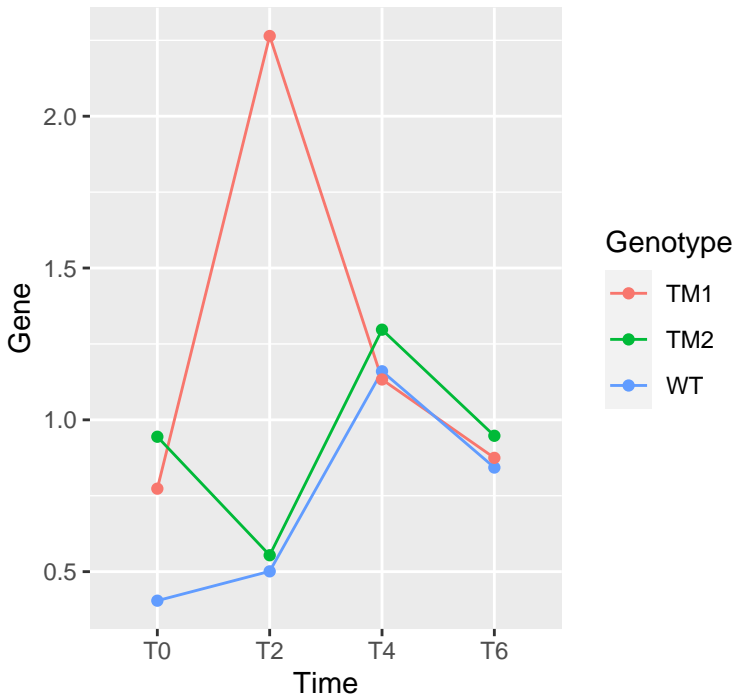

# AT5G67600

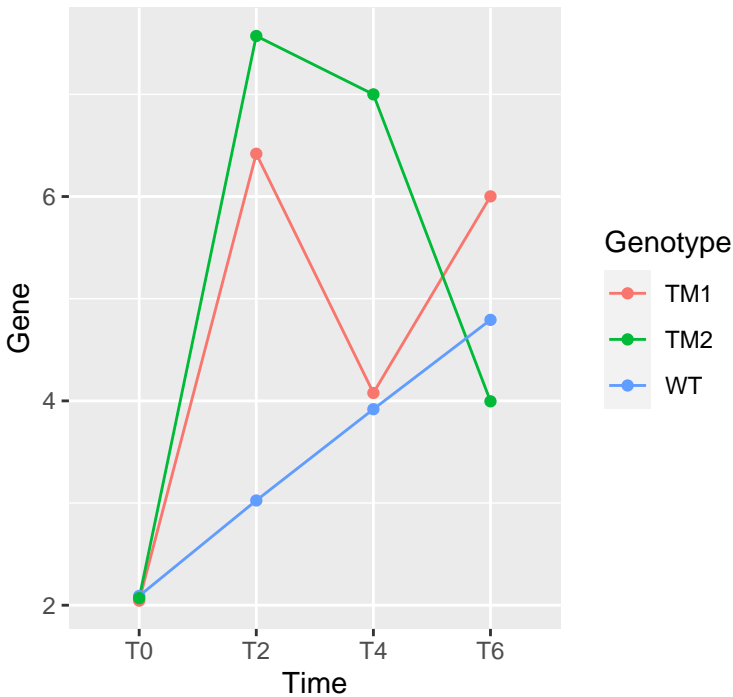

# AT5G67620

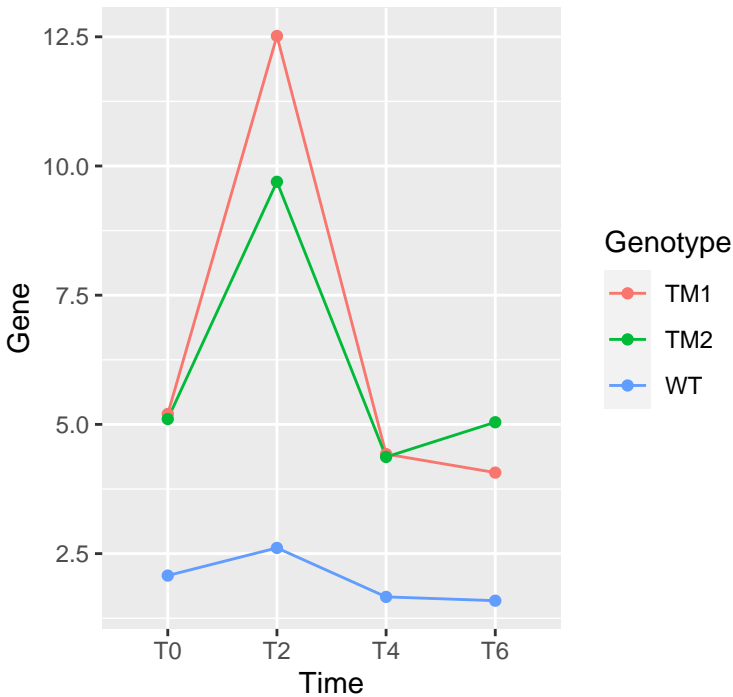

Supplement: PLD3-4-e00279-s007.pdf [file PLD3-4-e00279-s007.pdf]
